# Supplementary material for: Rhodaelectro-catalyzed chemo-divergent C–H activations with alkylidenecyclopropanes for selective cyclopropylations
Source: Royal Society of Chemistry journal article supplement (doi:10.1039/d0cc08123j), 2021-01-01

## Supporting Information

### **Rhodaelectro-catalyzed Chemo-Divergent C–H Activations with Alkylidenecyclopropanes for Selective Cyclopropylations**

Zhigao Shen, Isaac Maksso, Rositha Kuniyil, Torben Rogge, and Lutz Ackermann\*

Institut für Organische und Biomolekulare Chemie and  
Wöhler Research Institute for Sustainable Chemistry  
Georg-August-Universität Göttingen  
Tammannstraße 2, D-37077 Göttingen (Germany)  
Fax: +49/ 551-39-6777  
E-mail: Lutz.Ackermann@chemie.uni-goettingen.de

## Table of contents

|                                                                      |              |
|----------------------------------------------------------------------|--------------|
| <b>1. General Remarks .....</b>                                      | <b>S-2</b>   |
| <b>2. Optimization of the Dienylation and Cyclopropylation .....</b> | <b>S-3</b>   |
| <b>3. General Procedures .....</b>                                   | <b>S-9</b>   |
| <b>4. Characterization Data of Products .....</b>                    | <b>S-10</b>  |
| <b>5. Derivatization of 3aa.....</b>                                 | <b>S-53</b>  |
| <b>6. Mechanistic Studies .....</b>                                  | <b>S-55</b>  |
| <b>7. X-Ray Crystallographic Analysis.....</b>                       | <b>S-60</b>  |
| <b>8. Computational Data .....</b>                                   | <b>S-62</b>  |
| <b>9. Proposed Mechanism.....</b>                                    | <b>S-102</b> |
| <b>10. References .....</b>                                          | <b>S-104</b> |
| <b>11. NMR Spectra .....</b>                                         | <b>S-106</b> |

## 1. General Remarks

All organic solvents were distilled prior to their use. The following starting materials were synthesized according to previously described methods: **1**,<sup>[1]</sup> **2**<sup>[2]</sup> and **4**.<sup>[2]</sup> Other substrates were obtained from commercial sources and were used without further purification. Platinum (Pt) electrodes (10 mm × 15 mm × 0.25 mm, 99.9%; obtained from ChemPur, Karlsruhe, Germany) and graphite felt (GF) electrodes (thickness of 6 mm, SIGRACELL<sup>®</sup> GFA 6 EA, obtained from SGL Carbon, Wiesbaden, Germany) were connected using stainless steel adapters. Electrocatalysis was conducted using a Keysight E36104A or an AXIOMET AX-3003P potentiostat. Yields refer to isolated compounds, estimated to be >95% pure as determined by <sup>1</sup>H NMR spectroscopy. Chromatography was carried out on Merck silica gel 60 (40–63 μm). NMR spectra were recorded on a Varian Mercury VX 300, Inova 500 or Bruker Avance III 300, Avance III 400 and Avance III HD 500 in the solvent indicated; chemical shifts (δ) are given in ppm relative to the residual solvent peak. All IR spectra were recorded on a Bruker FT-IR Alpha-P device. EI-MS was recorded on Jeol AccuTOF at 70eV, ESI-MS on Bruker MicroTOF and maXis. GC-MS was recorded on Agilent 7890B and Agilent 5977B. Gel permeation chromatography (GPC) was performed on a Japan Analytical Industries (JAI) LC-92XX II NEXT system equipped with a JAIGEL 2.5HR or JAIGEL 2HH column. Chloroform was used as solvent. M.p.: Stuart melting point apparatus SMP3, Barloworld Scientific, values are uncorrected.

## 2. Optimization of the Dienylation and Cyclopropylation

Table S-1: Screening of the bases.<sup>[a]</sup>

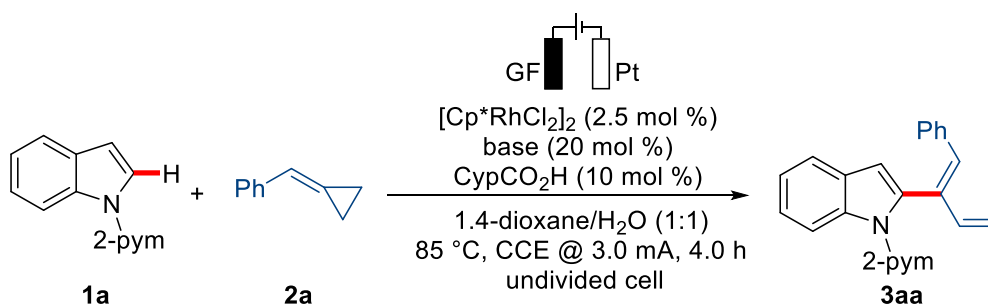

| Entry    | Base                              | Yield (%) | Z/E          |
|----------|-----------------------------------|-----------|--------------|
| 1        | NaOAc                             | 72        | 3.9/1        |
| 2        | NaOPiv                            | 78        | 3.5/1        |
| 3        | NaO <sub>2</sub> CMes             | 60        | 4.0/1        |
| 4        | NaO <sub>2</sub> CPh              | 82        | 3.6/1        |
| <b>5</b> | <b>NaO<sub>2</sub>CAd</b>         | <b>85</b> | <b>4.5/1</b> |
| 6        | NaO <sub>2</sub> CCF <sub>3</sub> | 72        | 3.5/1        |
| 7        | NaO <sub>3</sub> SCF <sub>3</sub> | trace     | n.d.         |

[a] Undivided cell, graphite felt anode (GF), platinum plate cathode (Pt), **1a** (0.10 mmol) **2a** (0.16 mmol), [Cp\*RhCl<sub>2</sub>]<sub>2</sub> (2.5 mol %), base (20 mol %), CypCO<sub>2</sub>H (10 mol %), 1,4-dioxane/H<sub>2</sub>O (1:1) 4.0 mL, 85 °C, CCE @ 3.0 mA, under air, 4.0 h, yield of isolated product, Z/E ratio determined by <sup>1</sup>H NMR spectroscopy, CypCO<sub>2</sub>H = cyclopentanecarboxylic acid.



**Table S-2:** Screening of acids.<sup>[a]</sup>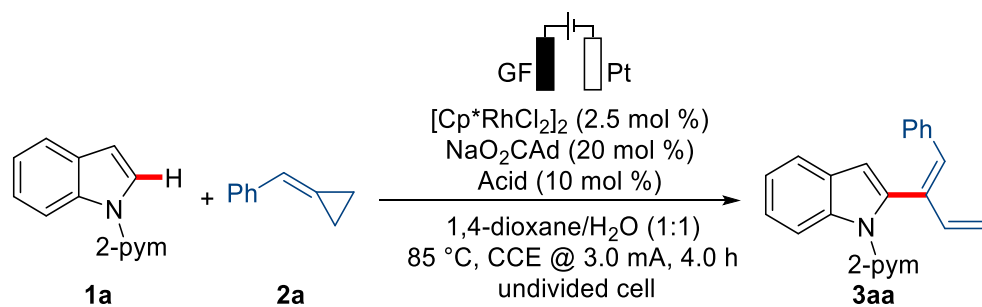

| Entry | Acid                 | Yield (%) | Z/E   |
|-------|----------------------|-----------|-------|
| 1     | CpCO <sub>2</sub> H  | 85        | 4.5/1 |
| 2     | AcOH                 | 76        | 3.6/1 |
| 3     | PivOH                | 82        | 3.3/1 |
| 4     | AdCO <sub>2</sub> H  | 82        | 4.0/1 |
| 5     | PhCO <sub>2</sub> H  | 79        | 3.7/1 |
| 6     | MesCO <sub>2</sub> H | 78        | 3.8/1 |
| 7     | --                   | 72        | 2.0/1 |

[a] Undivided cell, graphite felt anode (GF), platinum plate cathode (Pt), **1a** (0.10 mmol) **2a** (0.16 mmol),  $[\text{Cp}^*\text{RhCl}_2]_2$  (2.5 mol %),  $\text{NaO}_2\text{CAd}$  (20 mol %), acid (10 mol %), 1,4-dioxane/ $\text{H}_2\text{O}$  (1:1) 4.0 mL,  $85^\circ\text{C}$ , CCE @ 3.0 mA, under air, 4.0 h, yield of isolated product, Z/E ratio determined by  $^1\text{H}$  NMR spectroscopy.

**Table S-3:** Optimization of solvents.<sup>[a]</sup>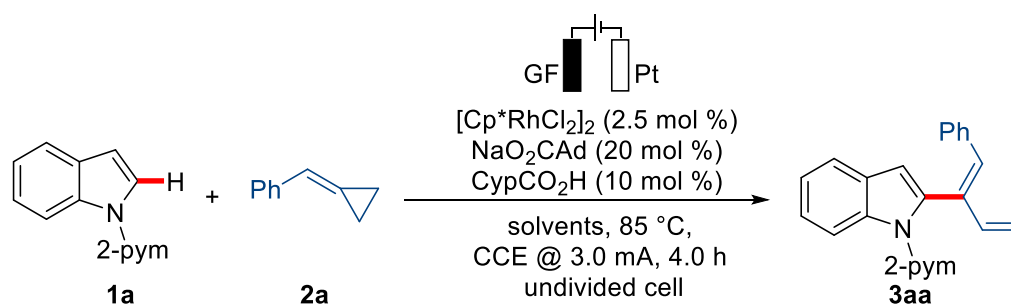

| Entry | Solvents                             | Yield (%) | Z/E   |
|-------|--------------------------------------|-----------|-------|
| 1     | 1,4-dioxane/H <sub>2</sub> O (1/1)   | 85        | 4.5/1 |
| 2     | H <sub>2</sub> O                     | trace     | n.d.  |
| 3     | 1,4-dioxane/H <sub>2</sub> O (2/1)   | 72        | 3.4/1 |
| 4     | <i>t</i> AmOH/H <sub>2</sub> O (3/1) | 82        | 2.5/1 |
| 5     | DMF                                  | trace     | n.d.  |
| 6     | EtOH                                 | 74        | 3.7/1 |

[a] Undivided cell, graphite felt anode (GF), platinum plate cathode (Pt), **1a** (0.10 mmol) **2a** (0.16 mmol), [Cp<sup>\*</sup>RhCl<sub>2</sub>]<sub>2</sub> (2.5 mol %), NaO<sub>2</sub>CAd (20 mol %), CypCO<sub>2</sub>H (10 mol %), solvent 4.0 mL, 85 °C, CCE @ 3.0 mA, under air, 4.0 h, yield of isolated product, Z/E ratio determined by <sup>1</sup>H NMR spectroscopy.

**Table S-4:** Control experiments.<sup>[a]</sup>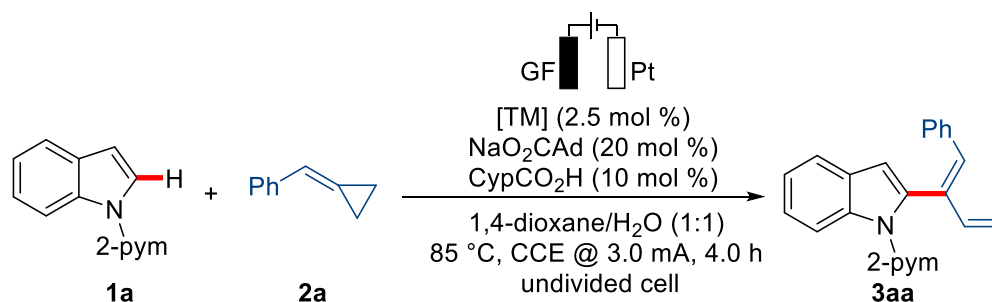

| Entry            | [TM]                                        | Base                 | Acid                 | Yield (%) | Z/E   |
|------------------|---------------------------------------------|----------------------|----------------------|-----------|-------|
| 1                | [Cp*RhCl <sub>2</sub> ] <sub>2</sub>        | NaO <sub>2</sub> CAd | CypCO <sub>2</sub> H | 85        | 4.5/1 |
| 2                | --                                          | NaO <sub>2</sub> CAd | CypCO <sub>2</sub> H | --        | --    |
| 3                | [Cp*RhCl <sub>2</sub> ] <sub>2</sub>        | --                   | CypCO <sub>2</sub> H | 32        | 3.2/1 |
| 4                | [Cp*RhCl <sub>2</sub> ] <sub>2</sub>        | NaO <sub>2</sub> CAd | --                   | 72        | 3.6/1 |
| 5 <sup>[b]</sup> | [Cp*RhCl <sub>2</sub> ] <sub>2</sub>        | NaO <sub>2</sub> CAd | CypCO <sub>2</sub> H | 24        | 2.4/1 |
| 6                | [RuCl <sub>2</sub> (p-cymene)] <sub>2</sub> | NaO <sub>2</sub> CAd | CypCO <sub>2</sub> H | --        | --    |
| 7                | Pd(OAc) <sub>2</sub>                        | NaO <sub>2</sub> CAd | CypCO <sub>2</sub> H | --        | --    |

[a] Undivided cell, graphite felt anode (GF), platinum plate cathode (Pt), **1a** (0.10 mmol) **2a** (0.16 mmol), [TM] (2.5 mol %), NaO<sub>2</sub>CAd (20 mol %), CypCO<sub>2</sub>H (10 mol %), 1,4-dioxane/H<sub>2</sub>O (1:1) 4.0 mL, 85 °C, CCE @ 3.0 mA, under air, 4.0 h, yield of isolated product, Z/E ratio determined by <sup>1</sup>H NMR spectroscopy. [b] Without electricity, 12 h.

**Table S-5:** Further optimization of dienylation.<sup>[a]</sup>

Reaction scheme showing the electrocatalytic dienylation of **1a** (2-pym) with **2a** (diene) to form **3aa** (dienylated product). The reaction conditions are:  $[Cp^*RhCl_2]_2$  (2.5 mol %),  $NaO_2CAAd$  (20 mol %),  $CypCO_2H$  (10 mol %), 1,4-dioxane/ $H_2O$  (1:1), 85 °C, CCE @ (mA),  $t$  (h), undivided cell. The cell setup includes a Graphite Felt (GF) anode and a Platinum (Pt) cathode.

| Entry                  | Current (mA) | $t$ (h) | Yield (%) | $Z/E$ |
|------------------------|--------------|---------|-----------|-------|
| 1                      | 3.0          | 4.0     | 85        | 4.5/1 |
| 2                      | 2.0          | 6.0     | 87        | 3.8/1 |
| 3                      | 4.0          | 3.0     | 72        | 3.2/1 |
| 4 <sup>[b]</sup>       | 3.0          | 4.0     | 82        | 6.0/1 |
| 5 <sup>[b, c]</sup>    | 5.0          | 3.0     | 87        | 6.5/1 |
| 6 <sup>[b, c, d]</sup> | 5.0          | 3.0     | 89        | 7.0/1 |

[a] Undivided cell, graphite felt anode (GF), platinum plate cathode (Pt), **1a** (0.10 mmol) **2a** (0.16 mmol),  $[Cp^*RhCl_2]_2$  (2.5 mol %),  $NaO_2CAAd$  (20 mol %),  $CypCO_2H$  (10 mol %), 1,4-dioxane/ $H_2O$  (1:1) 4.0 mL, 85 °C, CCE @ 3.0 mA, under air, yields of isolated product,  $Z/E$  ratio determined by  $^1H$  NMR spectroscopy. [b]  $NaO_2CAAd$  (40 mol %). [c] 0.20 mmol scale, 1,4-dioxane/ $H_2O$  (1:1) 8.0 mL. [d] 95 °C.

Under the optimized reaction conditions, the transformation of ACP **4a** yielded the cyclopropylated compound **5aa** in 95% yield (Scheme S-1).

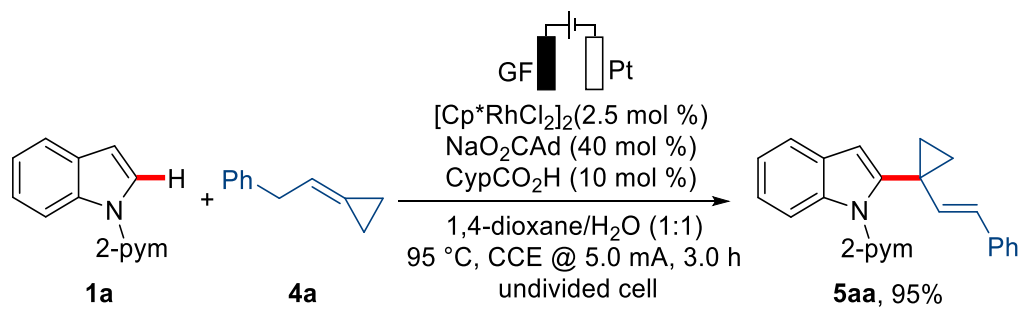

**Scheme S-1.** Cyclopropylation of indole **1a**

### 3. General Procedures

#### General Procedure A for the Rhodaelectro-Catalyzed Dienylation.

The electrolysis was carried out in an undivided cell with a GF anode (10 mm x 15 mm x 6 mm) and a Pt cathode (10 mm x 15 mm x 0.25 mm).  $[\text{Cp}^*\text{RhCl}_2]_2$  (3.0 mg, 5.0  $\mu\text{mol}$ , 2.5 mol %),  $\text{NaO}_2\text{CAd}$  (16.0 mg, 0.80 mmol, 40 mol %), cyclopentanecarboxylic acid (2.3 mg, 0.20 mmol, 10 mol %), ACP 2 (0.32 mmol, 1.6 equiv) and indole 1 (0.20 mmol, 1.0 equiv) were dissolved in 1,4-dioxane (4.0 mL) and then  $\text{H}_2\text{O}$  (4.0 mL) was added sequentially. At 95 °C, electrolysis was conducted with a constant current of 5.0 mA for 3.0 to 10 hours. Then the mixture was transferred to a flask and the electrodes were rinsed with EtOAc (3 x 5.0 mL). The combined solvent was extracted with EtOAc (3 x 10 mL), the organic layers combined and the solvent removed under reduced pressure. Column chromatography on silica gel (*n*-hexane/EtOAc) yielded the desired product 3.

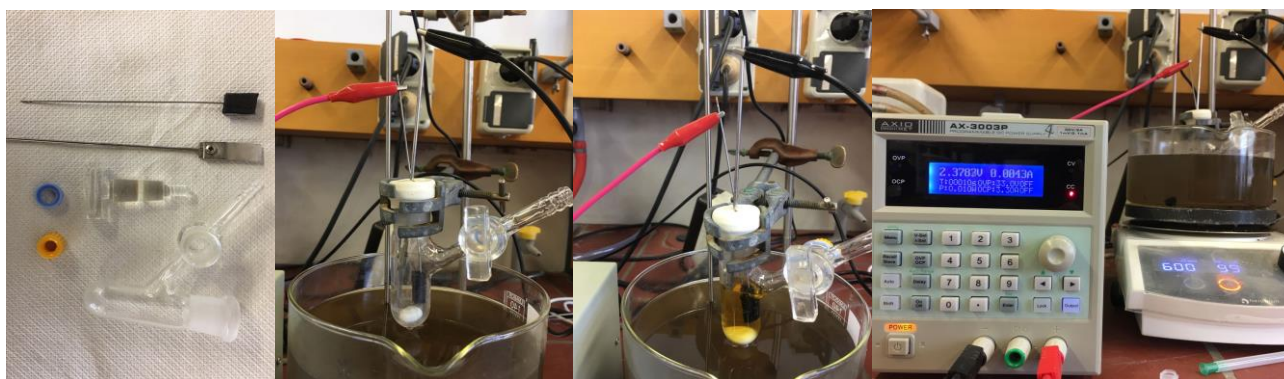

#### General Procedure B for the Rhodaelectro-Catalyzed Cyclopropylation.

The electrolysis was carried out in an undivided cell with a GF anode (10 mm x 15 mm x 6 mm) and a Pt cathode (10 mm x 15 mm x 0.25 mm).  $[\text{Cp}^*\text{RhCl}_2]_2$  (3.0 mg, 5.0  $\mu\text{mol}$ , 2.5 mol %),  $\text{NaO}_2\text{CAd}$  (16.0 mg, 0.8 mmol, 40 mol %), cyclopentanecarboxylic acid (2.3 mg, 0.2 mmol, 10 mol %), ACP 4 (0.32 mmol, 1.6 equiv) and indole 1 (0.20 mmol, 1.0 equiv) were dissolved in 1,4-dioxane (4.0 mL) and then water (4.0 mL) was added sequentially. At 95 °C, electrolysis was conducted with a constant current of 5.0 mA for 3.0 to 10 hours. Then the mixture was transferred to a flask and the electrodes were rinsed with EtOAc (3 x 5.0 mL). The combined solvent was extracted with EtOAc (3 x 10 mL), the organic layers combined and the solvent removed under reduced pressure. Column chromatography on silica gel (*n*-hexane/EtOAc) yielded the desired product 5.

## 4. Characterization Data of Products

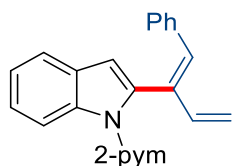

### (Z)-2-(1-Phenylbuta-1,3-dien-2-yl)-1-(pyrimidin-2-yl)-1H-indole (**3aa**)

The general procedure **A** was followed using 1-(pyrimidin-2-yl)-1H-indole (**1a**) (39.0 mg, 0.20 mmol) and (cyclopropylidene)methylbenzene (**2a**) (41.6 mg, 0.32 mmol) for 3.0 h. Isolation by column chromatography (*n*-hexane/EtOAc 15:1) yielded **3aa** (57.6 mg, 89%, *Z/E* = 7.0/1 as determined by <sup>1</sup>H NMR spectroscopy) as a yellow solid. The isomeric mixture was separated by GPC (CHCl<sub>3</sub>) and the *Z* (7.8 mg, 12%) and the *E* isomer (1.8 mg, 3%) were obtained as colorless oil or solid, respectively. **Mixture: M.p.** = 137–139 °C. **<sup>1</sup>H NMR** (400 MHz, CDCl<sub>3</sub>):  $\delta$  = 8.71 (d, *J* = 4.8 Hz, 0.25H, *E* isomer), 8.62 (d, *J* = 4.8 Hz, 1.75H, *Z* isomer), 8.33 (d, *J* = 8.3 Hz, 0.87H, *Z* isomer), 8.27 (d, *J* = 8.3 Hz, 0.13H, *E* isomer), 7.68 (d, *J* = 7.6 Hz, 0.13H, *E* isomer), 7.60 (d, *J* = 7.6, 0.87H, *Z* isomer), 7.66 – 7.46 (m, 0.53H, *E* isomer), 7.36 – 7.24 (m, 2.67H, *Z* isomer), 7.08 – 6.99 (m, 4.46H, *Z* isomer), 6.90 (s, 0.13H, *E* isomer), 6.83 (s, 0.13H, *E* isomer), 6.83 (dd, *J* = 17.4, 10.6 Hz, 0.13H, *E* isomer), 6.69 (dd, *J* = 17.4, 10.6 Hz, 0.87H, *Z* isomer), 6.68 (s, 0.87H, *Z* isomer), 6.57 (s, 0.87H, *Z* isomer), 5.06 (d, *J* = 10.6 Hz, 1H, *E* and *Z* isomer), 5.02 (d, *J* = 17.4 Hz, 1H, *E* and *Z* isomer). **<sup>13</sup>C NMR** (101 MHz, CDCl<sub>3</sub>) *Major isomer*:  $\delta$  = 157.9 (CH), 157.5 (C<sub>q</sub>), 140.6 (CH), 136.7 (C<sub>q</sub>), 136.7 (C<sub>q</sub>), 135.4 (C<sub>q</sub>), 134.0 (C<sub>q</sub>), 133.0 (CH), 129.5 (C<sub>q</sub>), 129.1 (CH), 128.1 (CH), 127.2 (CH), 123.4 (CH), 122.0 (CH), 120.8 (CH), 117.0 (CH<sub>2</sub>), 115.7 (CH), 114.2 (CH), 108.7 (CH). *Minor isomer*:  $\delta$  = 158.1 (CH), 140.5 (CH), 137.1 (C<sub>q</sub>), 134.8 (C<sub>q</sub>), 134.6 (C<sub>q</sub>), 134.2 (C<sub>q</sub>), 130.8 (CH), 129.8 (C<sub>q</sub>), 129.0 (CH), 128.3 (CH), 127.4 (CH), 123.7 (CH), 122.9 (CH), 122.1 (CH), 120.7 (CH), 117.8 (CH<sub>2</sub>), 117.2 (CH), 113.4 (CH), 109.4 (CH). One C<sub>q</sub> is missing due to low signal to noise ratio. **IR** (ATR): 3000, 2201, 1564, 1437, 1419, 1360, 1256, 1075, 812, 769 cm<sup>-1</sup>. **MS** (ESI) *m/z* (relative intensity): 324 (100) [M+H]<sup>+</sup>, 346 (80) [M+Na]<sup>+</sup>. **HR-MS** (ESI) *m/z* calcd for C<sub>22</sub>H<sub>18</sub>N<sub>3</sub> [M+H]<sup>+</sup> 324.1495, found 324.1484.

**Isolated (Z)-3aa:** **<sup>1</sup>H NMR** (400 MHz, CDCl<sub>3</sub>):  $\delta$  = 8.64 (d, *J* = 4.8 Hz, 2H), 8.34 (d, *J* = 8.3 Hz, 1H), 7.61 (d, *J* = 7.6 Hz, 1H), 7.33 (t, *J* = 7.8 Hz, 1H), 7.25 (t, *J* = 7.4 Hz, 1H), 7.10 – 7.00 (m, 6H), 6.69 (dd, *J* = 17.4, 10.6 Hz, 1H), 6.68 (s, 1H), 6.57 (s, 1H), 5.07 (d, *J* = 10.6 Hz, 1H), 5.05 (d, *J* = 17.4 Hz, 1H). **<sup>13</sup>C NMR** (101 MHz, CDCl<sub>3</sub>)  $\delta$  = 157.9 (CH), 157.5 (C<sub>q</sub>), 140.6 (CH), 136.7 (C<sub>q</sub>), 136.7 (C<sub>q</sub>), 135.4 (C<sub>q</sub>), 134.0 (C<sub>q</sub>), 133.0 (CH), 129.5 (C<sub>q</sub>), 129.1 (CH), 128.1 (CH), 127.2 (CH), 123.4 (CH), 122.0 (CH), 120.8 (CH), 117.0 (CH<sub>2</sub>), 115.7 (CH), 114.2 (CH), 108.7

(CH). **IR** (ATR): 3015, 2221, 1565, 1458, 1419, 1315, 1218, 984, 909, 810  $\text{cm}^{-1}$ . **MS** (ESI)  $m/z$  (relative intensity): 324 (100)  $[\text{M}+\text{H}]^+$ . **HR-MS** (ESI)  $m/z$  calcd for  $\text{C}_{22}\text{H}_{18}\text{N}_3$   $[\text{M}+\text{H}]^+$  324.1495, found 324.1495.

**Isolated (E)-3aa: M.p.** = 129-130  $^{\circ}\text{C}$ .  **$^1\text{H}$  NMR** (400 MHz,  $\text{CDCl}_3$ )  $\delta$  = 8.73 (d,  $J$  = 4.8 Hz, 2H), 8.26 (d,  $J$  = 8.3 Hz, 1H), 7.67 (d,  $J$  = 7.6 Hz, 1H), 7.49 – 7.36 (m, 4H), 7.36 – 7.25 (m, 2H), 7.27 – 7.21 (m, 1H), 7.10 (t,  $J$  = 4.8 Hz, 1H), 6.89 (s, 1H), 6.83 (dd,  $J$  = 17.4, 10.6 Hz, 1H), 6.82 (s, 1H), 5.08 (d,  $J$  = 17.4 Hz, 1H), 5.00 (d,  $J$  = 10.6 Hz, 1H).  **$^{13}\text{C}$  NMR** (101 MHz,  $\text{CDCl}_3$ )  $\delta$  = 158.2 (CH), 157.9 ( $\text{C}_q$ ), 140.5 (CH), 137.3 ( $\text{C}_q$ ), 134.8 ( $\text{C}_q$ ), 134.2 ( $\text{C}_q$ ), 134.2 ( $\text{C}_q$ ), 130.9 (CH), 129.8 ( $\text{C}_q$ ), 129.2 (CH), 129.1 (CH), 128.3 (CH), 128.1 (CH), 127.4 (CH), 123.7 (CH), 122.1 (CH), 120.7 (CH), 117.8 ( $\text{CH}_2$ ), 117.4 (CH), 113.4 (CH), 109.4 (CH). **IR** (ATR): 3046, 2922, 1567, 1426, 1349, 1319, 915, 805, 746, 700  $\text{cm}^{-1}$ . **MS** (ESI)  $m/z$  (relative intensity): 324 (100)  $[\text{M}+\text{H}]^+$ . **HR-MS** (ESI)  $m/z$  calcd for  $\text{C}_{22}\text{H}_{18}\text{N}_3$   $[\text{M}+\text{H}]^+$  324.1495, found 324.1497.

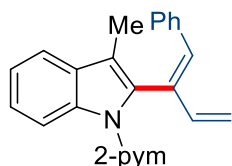

### **(Z)-3-Methyl-2-(1-phenylbuta-1,3-dien-2-yl)-1-(pyrimidin-2-yl)-1H-indole (3ba)**

The general procedure **A** was followed using 3-methyl-1-(pyrimidin-2-yl)-1H-indole (**1b**) (41.8 mg, 0.20 mmol) and (cyclopropylidene)methylbenzene (**2a**) (41.6 mg, 0.32 mmol) for 3.5 h. Isolation by column chromatography (*n*-hexane/EtOAc 15:1) yielded **3ba** (46.5 mg, 69%, *Z/E* = 9.5/1 determined by  $^1\text{H}$  NMR spectroscopy) as a yellow solid. **M.p.** = 102–104  $^{\circ}\text{C}$ .  **$^1\text{H}$  NMR** (300 MHz,  $\text{CDCl}_3$ )  $\delta$  = 8.69 (d,  $J$  = 4.8 Hz, 0.19H, *E* isomer), 8.65 (d,  $J$  = 4.8 Hz, 1.81H, *Z* isomer), 8.44 (d,  $J$  = 8.3 Hz, 0.89H, *Z* isomer), 8.33 (d,  $J$  = 8.3 Hz, 0.11H, *E* isomer), 7.65 (d,  $J$  = 7.5 Hz, 0.14H, *E* isomer), 7.58 (d,  $J$  = 7.5 Hz, 0.86H, *Z* isomer), 7.51 – 7.28 (m, 3.13H, *E* and *Z* isomer), 7.28 – 7.21 (m, 1.26H, *E* and *Z* isomer), 7.19 – 7.07 (m, 4.07H, *Z* isomer), 7.01 (t,  $J$  = 4.8 Hz, 0.95H, *Z* isomer), 6.89 (dd,  $J$  = 17.2, 10.9 Hz, 0.19H, *E* isomer), 6.81 (s, 0.86H, *Z* isomer), 6.71 (s, 0.14H, *E* isomer), 6.65 (dd,  $J$  = 17.2, 10.9 Hz, 0.81H, *Z* isomer), 5.03 (d,  $J$  = 10.9 Hz, 0.16H, *E* isomer), 4.97 (d,  $J$  = 10.9 Hz, 0.84H, *Z* isomer), 4.81 (d,  $J$  = 17.2 Hz, 1H, *E* and *Z* isomer), 2.00 (s, 2.87H, *Z* isomer), 1.79 (s, 0.13H, *E* isomer).  **$^{13}\text{C}$  NMR** (101 MHz,  $\text{CDCl}_3$ ) *Major isomer*:  $\delta$  = 157.9 (CH), 157.8 ( $\text{C}_q$ ), 140.3 (CH), 137.2 ( $\text{C}_q$ ), 136.5 ( $\text{C}_q$ ), 133.6 ( $\text{C}_q$ ), 133.5 (CH), 132.0 ( $\text{C}_q$ ), 130.7 ( $\text{C}_q$ ), 128.8 (CH), 128.2 (CH), 127.2 (CH), 123.6 (CH), 121.6 (CH), 119.0 (CH), 116.6 (CH), 115.2 ( $\text{CH}_2$ ), 114.9 ( $\text{C}_q$ ), 114.4 (CH), 9.0 ( $\text{CH}_3$ ). *Minor isomer*:  $\delta$  = 158.1 (CH), 130.5 (CH), 129.8 (CH), 129.0 (CH), 128.3 (CH), 128.0 (CH), 126.1 (CH), 123.1 (CH), 121.8 (CH), 121.2 ( $\text{C}_q$ ), 117.2 (CH), 113.0 ( $\text{CH}_2$ ), 16.2 ( $\text{CH}_3$ ). **IR** (ATR): 3048, 2920,



1565, 1425, 1354, 1223, 1017, 988, 801, 748  $\text{cm}^{-1}$ . **MS** (ESI)  $m/z$  (relative intensity): 338 (100)  $[\text{M}+\text{H}]^+$ , 360 (68)  $[\text{M}+\text{Na}]^+$ . **HR-MS** (ESI)  $m/z$  calcd for  $\text{C}_{23}\text{H}_{20}\text{N}_3$   $[\text{M}+\text{H}]^+$  338.1657, found 338.1642.

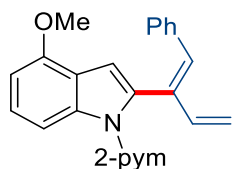

**(Z)-4-Methoxy-2-(1-phenylbuta-1,3-dien-2-yl)-1-(pyrimidin-2-yl)-1H-indole (3ca)**

The general procedure **A** was followed using 4-methoxy-1-(pyrimidin-2-yl)-1H-indole (**1c**) (45.0 mg, 0.20 mmol) and (cyclopropylidene)methylbenzene (**2a**) (41.6 mg, 0.32 mmol) for 2.8 h. Isolation by column chromatography (*n*-hexane/EtOAc 15:1) yielded **3ca** (67.2 mg, 95%, *Z/E* = 3.3/1 determined by  $^1\text{H}$  NMR spectroscopy) as a yellow solid. **M.p.** = 98–99 °C.  **$^1\text{H}$  NMR** (400 MHz,  $\text{CDCl}_3$ )  $\delta$  = 8.72 (d,  $J$  = 4.8 Hz, 0.46H, *E* isomer), 8.61 (d,  $J$  = 4.8 Hz, 1.54H, *Z* isomer), 7.90 (d,  $J$  = 8.5 Hz, 0.76H, *Z* isomer), 7.85 (d,  $J$  = 8.5 Hz, 0.24H, *E* isomer), 7.44 (d,  $J$  = 7.6 Hz, 0.70H, *Z* isomer), 7.39 (t,  $J$  = 7.6 Hz, 0.23H, *E* isomer), 7.31 (d,  $J$  = 7.6 Hz, 0.30H, *E* isomer), 7.25 (t,  $J$  = 7.6 Hz, 0.77H, *Z* isomer), 7.13 – 6.95 (m, 5H, *E* and *Z* isomer), 6.95 (d,  $J$  = 1.0 Hz, 0.25H, *E* isomer), 6.90 (s, 0.27H, *E* isomer), 6.81 (ddd,  $J$  = 17.5, 10.9, 1.0 Hz, 0.35H, *E* isomer), 6.73 – 6.64 (m, 3H, *E* and *Z* isomer), 5.09 (d,  $J$  = 10.6 Hz, 0.76H, *Z* isomer), 5.09 (d,  $J$  = 17.4 Hz, 1H, *E* and *Z* isomer), 4.99 (d,  $J$  = 10.9 Hz, 0.24H, *E* isomer), 4.02 (s, 0.75H, *E* isomer), 3.98 (s, 2.25H, *Z* isomer).  **$^{13}\text{C}$  NMR** (101 MHz,  $\text{CDCl}_3$ ) *Major isomer*:  $\delta$  = 158.1 ( $\text{C}_q$ ), 157.8 (CH), 153.1 ( $\text{C}_q$ ), 140.6 (CH), 138.0 ( $\text{C}_q$ ), 136.7 ( $\text{C}_q$ ), 133.9 ( $\text{C}_q$ ), 133.8 ( $\text{C}_q$ ), 133.0 (CH), 129.1 (CH), 128.0 (CH), 127.1 (CH), 124.2 (CH), 120.0 ( $\text{C}_q$ ), 117.1 (CH), 115.8 ( $\text{CH}_2$ ), 107.4 (CH), 105.7 (CH), 102.1 (CH), 55.5 ( $\text{CH}_3$ ). *Minor isomer*:  $\delta$  = 158.1 ( $\text{C}_q$ ), 157.5 (CH) 139.1 ( $\text{C}_q$ ), 138.6 ( $\text{C}_q$ ), 137.4 ( $\text{C}_q$ ), 134.8 (CH), 134.1 ( $\text{C}_q$ ), 130.8 (CH), 129.8 (CH), 128.3 (CH), 127.3 (CH), 124.5 (CH), 119.6 ( $\text{C}_q$ ), 117.7 (CH), 117.4 ( $\text{CH}_2$ ), 106.6 (CH), 106.4 (CH), 102.2 (CH), 55.6 ( $\text{CH}_3$ ). One  $\text{C}_q$  is missing due to low signal to noise ratio or signal overlap. **IR** (ATR): 3026, 1693, 1564, 1420, 1336, 1240, 1149, 910, 805, 740  $\text{cm}^{-1}$ . **MS** (ESI)  $m/z$  (relative intensity): 354 (15)  $[\text{M}+\text{H}]^+$ , 376 (30)  $[\text{M}+\text{Na}]^+$ . **HR-MS** (ESI)  $m/z$  calcd for  $\text{C}_{23}\text{H}_{20}\text{N}_3\text{O}$   $[\text{M}+\text{H}]^+$  354.1606, found 354.1601.

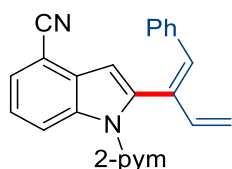

**(Z)-2-(1-Phenylbuta-1,3-dien-2-yl)-1-(pyrimidin-2-yl)-1H-indole-4-carbonitrile (3da)**

The general procedure **A** was followed using 1-(pyrimidin-2-yl)-1H-indole-4-carbonitrile (**1d**) (44.0 mg, 0.20 mmol) and (cyclopropylidene)methylbenzene (**2a**) (41.6 mg, 0.32 mmol) for 5.0 h. Isolation by column chromatography (*n*-hexane/EtOAc 15:1) yielded **3da** (41.8 mg, 60%, *Z/E* = 2.0/1 determined by <sup>1</sup>H NMR spectroscopy) as a yellow oil. <sup>1</sup>H NMR (300 MHz, CDCl<sub>3</sub>) δ = 8.74 (d, *J* = 4.8 Hz, 0.66H, *E* isomer), 8.63 (d, *J* = 4.8 Hz, 1.34H, *Z* isomer), 8.46 (d, *J* = 8.5 Hz, 0.64H, *Z* isomer), 8.42 (d, *J* = 8.5 Hz, 0.36H, *E* isomer), 7.57 (d, *J* = 7.5 Hz, 0.64H, *Z* isomer), 7.45 – 7.29 (m, 3H, *E* and *Z* isomer), 7.16 (t, *J* = 4.8 Hz, 0.36H, *E* isomer), 7.14 – 6.84 (m, 5H, *E* and *Z* isomer), 6.79 – 6.64 (m, 1H, *E* and *Z* isomer), 5.10 (d, *J* = 10.7 Hz, 0.64H, *Z* isomer), 5.04 (d, *J* = 17.6 Hz, 0.36H, *E* isomer), 5.04 (d, *J* = 10.7 Hz, 0.36H, *E* isomer), 4.97 (d, *J* = 17.6 Hz, 0.64H, *Z* isomer). <sup>13</sup>C NMR (101 MHz, CDCl<sub>3</sub>) *Major isomer*: δ = 158.0 (CH), 156.7 (C<sub>q</sub>), 139.8 (CH), 138.4 (C<sub>q</sub>), 136.7 (C<sub>q</sub>), 136.1 (C<sub>q</sub>), 133.9 (CH), 132.6 (C<sub>q</sub>), 130.8 (C<sub>q</sub>), 128.8 (CH), 128.1 (CH), 127.5 (CH), 126.8 (CH), 122.9 (CH), 118.7 (CH), 118.4 (C<sub>q</sub>), 117.9 (CH), 115.9 (CH<sub>2</sub>), 106.6 (CH), 103.1 (C<sub>q</sub>). *Minor isomer*: δ = 158.3 (CH), 157.3 (C<sub>q</sub>), 143.3 (C<sub>q</sub>), 136.8 (C<sub>q</sub>), 136.1 (C<sub>q</sub>), 132.9 (C<sub>q</sub>), 132.4 (CH), 130.7 (C<sub>q</sub>), 129.7 (CH), 128.3 (CH), 127.7 (CH), 126.8 (CH), 123.1 (CH), 118.2 (CH<sub>2</sub>), 118.0 (CH), 107.1 (CH), 102.9 (C<sub>q</sub>). One C<sub>q</sub> is missing due to low signal to noise ratio or signal overlap. IR (ATR): 3050, 1693, 1567, 1425, 1318, 1263, 1234, 1078, 913, 786 cm<sup>-1</sup>. MS (ESI) *m/z* (relative intensity): 349 (100) [M+H]<sup>+</sup>, 371 (40) [M+Na]<sup>+</sup>. HR-MS (ESI) *m/z* calcd for C<sub>23</sub>H<sub>17</sub>N<sub>4</sub> [M+H]<sup>+</sup> 349.1448, found 349.1449.

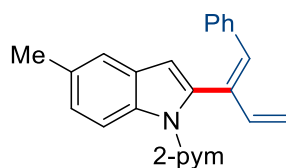

**(Z)-5-Methyl-2-(1-phenylbuta-1,3-dien-2-yl)-1-(pyrimidin-2-yl)-1H-indole (3ea)**

The general procedure **A** was followed using 5-methyl-1-(pyrimidin-2-yl)-1H-indole (**1e**) (41.8 mg, 0.20 mmol) and (cyclopropylidene)methylbenzene (**2a**) (41.6 mg, 0.32 mmol) for 3.5 h. Isolation by column chromatography (*n*-hexane/EtOAc 15:1) yielded **3ea** (50.6 mg, 75%, *Z/E* = 8.3/1 determined by <sup>1</sup>H NMR spectroscopy) as a yellow oil. <sup>1</sup>H NMR (400 MHz, CDCl<sub>3</sub>) δ = 8.70 (d, *J* = 4.8 Hz, 0.21H, *E* isomer), 8.61 (d, *J* = 4.8 Hz, 1.79H, *Z* isomer), 8.25 (d, *J* = 8.6 Hz, 0.89H, *Z* isomer), 8.17 (d, *J* = 8.6 Hz, 0.11H, *E* isomer), 7.50 – 7.28 (m, 2H, *E* and *Z*

isomer), 7.15 (d,  $J = 8.2$  Hz, 1.06H, *E* and *Z* isomer), 7.13 – 6.92 (m, 4.06H, *E* and *Z* isomer), 6.88 (s, 0.12H, *E* isomer), 6.87 (s, 0.11H, *E* isomer), 6.82 (dd,  $J = 17.4, 10.7$  Hz, 0.13H, *E* isomer), 6.72 (dd,  $J = 17.4, 10.7$  Hz, 0.87H, *Z* isomer), 6.68 (s, 0.89H, *Z* isomer), 6.50 (s, 0.88H, *Z* isomer), 5.06 (d,  $J = 10.7$  Hz, 1.04H, *E* and *Z* isomer), 5.01 (d,  $J = 17.5$  Hz, 1.04H, *E* and *Z* isomer), 2.50 (s, 3.01H, *E* and *Z* isomer).  $^{13}\text{C}$  NMR (101 MHz,  $\text{CDCl}_3$ ) *Major isomer*:  $\delta = 157.8$  (CH), 157.5 ( $\text{C}_q$ ), 140.7 (CH), 136.8 ( $\text{C}_q$ ), 135.4 ( $\text{C}_q$ ), 135.0 ( $\text{C}_q$ ), 134.3 ( $\text{C}_q$ ), 132.8 (CH), 131.4 ( $\text{C}_q$ ), 129.8 ( $\text{C}_q$ ), 129.1 (CH), 128.1 (CH), 127.2 (CH), 124.9 (CH), 120.6 (CH), 116.8 (CH), 115.6 ( $\text{CH}_2$ ), 114.1 (CH), 108.5 (CH), 21.5 ( $\text{CH}_3$ ) *Minor isomer*:  $\delta = 158.1$  (CH), 140.5 ( $\text{C}_q$ ), 137.4 (CH), 135.7 ( $\text{C}_q$ ), 134.9 (CH), 134.4 ( $\text{C}_q$ ), 131.4 ( $\text{C}_q$ ) 130.6 (CH), 129.4 ( $\text{C}_q$ ), 128.3 ( $\text{CH}_2$ ), 127.3 (CH), 125.2 (CH), 120.5 (CH), 117.6 (CH), 117.1 (CH), 113.3 (CH), 109.3 (CH), 21.5 ( $\text{CH}_3$ ). Two  $\text{C}_q$  are missing due to low signal to noise ration or signal overlap. IR (ATR): 2919, 2860, 1565, 1423, 1217, 1080, 987, 806, 751, 699  $\text{cm}^{-1}$ . MS (ESI)  $m/z$  (relative intensity): 338 (80)  $[\text{M}+\text{H}]^+$ , 360 (100)  $[\text{M}+\text{Na}]^+$ . HR-MS (ESI)  $m/z$  calcd for  $\text{C}_{23}\text{H}_{19}\text{N}_3\text{Na}$   $[\text{M}+\text{Na}]^+$  360.1470, found 360.1471.

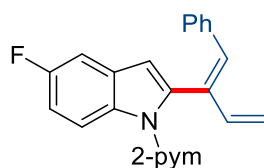

### (*Z*)-5-Fluoro-2-(1-phenylbuta-1,3-dien-2-yl)-1-(pyrimidin-2-yl)-1*H*-indole (**3fa**)

The general procedure **A** was followed using 5-fluoro-1-(pyrimidin-2-yl)-1*H*-indole (**1f**) (42.6 mg, 0.20 mmol) and (cyclopropylidene)methylbenzene (**2a**) (41.6 mg, 0.32 mmol) for 3.5 h. Isolation by column chromatography (*n*-hexane/EtOAc 15:1) yielded **3fa** (48.5 mg, 71%, *Z/E* = 5.1/1 determined by  $^1\text{H}$  NMR spectroscopy) as a yellow solid. **M.p.** = 104–106 °C.  $^1\text{H}$  NMR (400 MHz,  $\text{CDCl}_3$ )  $\delta = 8.67$  (d,  $J = 4.8$  Hz, 0.33H, *E* isomer), 8.58 (d,  $J = 4.8$  Hz, 1.67H, *Z* isomer), 8.25 (dd,  $J = 9.1, 4.7$  Hz, 0.84H, *Z* isomer), 8.17 (dd,  $J = 9.1, 4.7$  Hz, 0.16H, *E* isomer), 7.65 – 7.48 (m, 0.15H, *E* isomer), 7.45 – 7.31 (m, 0.85H, *Z* isomer), 7.20 (d,  $J = 9.0$  Hz, 0.88H, *Z* isomer), 7.18 (d,  $J = 9.1$  Hz, 0.12H, *E* isomer), 7.05 – 7.03 (m, 2H, *E* and *Z* isomer), 7.01 – 6.94 (m, 3H, *E* and *Z* isomer), 6.83 (s, 0.20H, *E* isomer), 6.78 (dd,  $J = 17.7, 10.5$  Hz, 0.25H, *E* isomer), 6.78 (s, 0.15H, *E* isomer), 6.66 (dd,  $J = 17.7, 10.5$  Hz, 0.80H, *Z* isomer), 6.65 (s, 0.85H, *Z* isomer), 6.48 (s, 0.80H, *Z* isomer), 5.03 (d,  $J = 10.5$ , 1H, *E* and *Z* isomer), 4.95 (d,  $J = 17.6$  Hz, 1H, *E* and *Z* isomer).  $^{13}\text{C}$  NMR (101 MHz,  $\text{CDCl}_3$ ) *Major isomer*:  $\delta = 158.8$  (d,  $^1J_{\text{C-F}} = 297.2$  Hz,  $\text{C}_q$ ), 157.9 (CH), 157.9 (d,  $^4J_{\text{C-F}} = 2.7$  Hz,  $\text{C}_q$ ), 140.4 (CH), 137.1 ( $\text{C}_q$ ), 136.6 ( $\text{C}_q$ ), 133.9 ( $\text{C}_q$ ), 133.1 (CH), 132.9 (CH), 130.2 (d,  $^3J_{\text{C-F}} = 10.0$  Hz,  $\text{C}_q$ ), 129.1 (CH), 128.1 (CH), 127.3 (CH), 123.4 (CH), 122.0 (CH), 120.8 (CH), 117.2 (CH), 115.7 ( $\text{CH}_2$ ), 115.3 (d,  $^3J_{\text{C-}}$

$\delta = 9.1$  Hz, CH), 111.3 (d,  $^2J_{C-F} = 25.3$  Hz, CH), 108.4 (d,  $^4J_{C-F} = 4.1$  Hz, C<sub>q</sub>), 105.8 (d,  $^2J_{C-F} = 23.5$  Hz, CH). *Minor isomer*:  $\delta = 158.2$  (CH), 142.0 (C<sub>q</sub>), 140.6 (CH), 137.2 (C<sub>q</sub>), 135.4 (C<sub>q</sub>), 134.7 (C<sub>q</sub>), 134.1 (C<sub>q</sub>), 133.1 (CH), 133.0 (CH), 131.2 (C<sub>q</sub>), 129.8 (CH), 128.4 (CH), 127.5 (CH), 117.7 (CH), 117.5 (CH), 117.1 (CH<sub>2</sub>), 114.5 (d,  $^3J_{C-F} = 9.1$  Hz, CH), 114.2 (CH), 111.6 (CH) (d,  $^2J_{C-F} = 25.3$  Hz, CH), 109.1 (d,  $^4J_{C-F} = 4.1$  Hz, C<sub>q</sub>), 108.7, (d,  $^2J = 23.5$  Hz, CH). **<sup>19</sup>F NMR** (377 MHz, CDCl<sub>3</sub>)  $\delta = -118.5$  (td,  $J = 9.1, 4.6$  Hz, *E* isomer),  $-122.3$  (td,  $J = 9.1, 4.6$  Hz, *Z* isomer). **IR** (ATR): 3053, 2130, 1961, 1710, 1568, 1427, 1419, 1196, 804, 698 cm<sup>-1</sup>. **MS** (ESI)  $m/z$  (relative intensity): 342 (100) [M+H]<sup>+</sup>, 364 (95) [M+Na]<sup>+</sup>. **HR-MS** (ESI)  $m/z$  calcd for C<sub>22</sub>H<sub>17</sub>N<sub>3</sub>F [M+H]<sup>+</sup> 342.1401, found 342.1403.

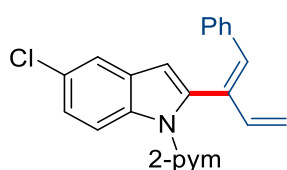

**(Z)-5-chloro-2-(1-phenylbuta-1,3-dien-2-yl)-1-(pyrimidin-2-yl)-1H-indole (3ga)**

The general procedure **A** was followed using 5-chloro-1-(pyrimidin-2-yl)-1H-indole (**1g**) (45.9 mg, 0.20 mmol) and (cyclopropylidene)methylbenzene (**2a**) (41.6 mg, 0.32 mmol) for 3.5 h. Isolation by column chromatography (*n*-hexane/EtOAc 15:1) yielded **3ga** (40.8 mg, 57%, *Z/E* = 3.6/1 determined by <sup>1</sup>H NMR spectroscopy) as a yellow oil. **<sup>1</sup>H NMR** (300 MHz, CDCl<sub>3</sub>)  $\delta = 8.73$  (d,  $J = 4.8$  Hz, 0.43H, *E* isomer), 8.63 (d,  $J = 4.8$  Hz, 1.57H, *Z* isomer), 8.28 (d,  $J = 8.9$  Hz, 0.79H, *Z* isomer), 8.20 (d,  $J = 8.9$  Hz, 0.21H, *E* isomer), 7.63 (d,  $J = 2.1$  Hz, 0.21H, *E* isomer), 7.58 (d,  $J = 2.1$  Hz, 0.79H, *Z* isomer), 7.50 – 7.35 (m, 1H, *E* isomer), 7.33 (d,  $J = 6.8$  Hz, 0.20H, *E* isomer), 7.28 (dd,  $J = 8.7, 2.3$  Hz, 0.80H, *Z* isomer), 7.12 – 7.07 (m, 2.50H, *Z* isomer), 7.05 (t,  $J = 4.8$  Hz, 0.78H, *Z* isomer), 7.02 – 6.97 (m, 1.50H, *E* isomer), 6.89 (s, 0.22H, *E* isomer), 6.83 (dd,  $J = 17.8, 10.9$  Hz, 0.25H, *E* isomer), 6.76 (s, 0.21H, *E* isomer), 6.71 (s, 0.79H, *Z* isomer), 6.70 (dd,  $J = 17.8, 10.9$  Hz, 0.85H, *Z* isomer), 6.52 (s, 0.78H, *Z* isomer), 5.09 (d,  $J = 10.9$  Hz, 1H, *E* and *Z* isomer), 5.00 (d,  $J = 17.8$  Hz, 1H, *E* and *Z* isomer). **<sup>13</sup>C NMR** (101 MHz, CDCl<sub>3</sub>) *Major isomer*:  $\delta = 158.0$  (CH), 157.2 (C<sub>q</sub>), 141.8 (C<sub>q</sub>), 140.3 (CH), 136.9 (C<sub>q</sub>), 136.5 (C<sub>q</sub>), 135.0 (C<sub>q</sub>), 133.6 (C<sub>q</sub>), 133.3 (CH), 130.6 (C<sub>q</sub>), 129.0 (CH), 128.1 (CH), 127.3 (CH), 123.5 (CH), 120.1 (CH), 117.3 (CH), 115.7 (CH<sub>2</sub>), 115.5 (CH), 108.0 (CH). *Minor isomer*:  $\delta = 158.2$  (CH), 157.7 (C<sub>q</sub>), 137.1 (C<sub>q</sub>), 135.6 (CH), 134.7 (CH), 133.8 (C<sub>q</sub>), 131.4 (CH), 130.3 (C<sub>q</sub>), 128.4 (CH), 127.5 (CH), 123.8 (CH), 120.0 (CH), 117.8 (CH), 117.6 (CH<sub>2</sub>), 114.7 (CH), 108.6 (CH). Three C<sub>q</sub> are missing due to low signal to noise ratio or signal overlap. **MS** (ESI)  $m/z$  (relative intensity): 358 (90) (<sup>35</sup>Cl) [M+H]<sup>+</sup>, 380 (40) (<sup>35</sup>Cl) [M+Na]<sup>+</sup>. **HR-MS** (ESI)  $m/z$  calcd for C<sub>22</sub>H<sub>17</sub>N<sub>3</sub><sup>35</sup>Cl [M+H]<sup>+</sup> 358.1106, found 358.1104.

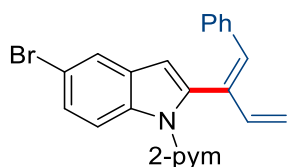

**(Z)-5-Bromo-2-(1-phenylbuta-1,3-dien-2-yl)-1-(pyrimidin-2-yl)-1H-indole (3ha)**

The general procedure **A** was followed using 5-bromo-1-(pyrimidin-2-yl)-1H-indole (**1h**) (54.8 mg, 0.20 mmol) and (cyclopropylidene)methylbenzene (**2a**) (41.9 mg, 0.32 mmol) for 3.5 h. Isolation by column chromatography (*n*-hexane/EtOAc 15:1) yielded **3ha** (54.7 mg, 68%, *Z/E* = 6.9/1 determined by <sup>1</sup>H NMR spectroscopy) as a yellow oil. <sup>1</sup>H NMR (400 MHz, CDCl<sub>3</sub>) δ = 8.72 (d, *J* = 4.8 Hz, 0.26H, *E* isomer), 8.63 (d, *J* = 4.7 Hz, 1.74H, *Z* isomer), 8.23 (d, *J* = 8.9 Hz, 0.84H, *Z* isomer), 8.15 (d, *J* = 8.9 Hz, 0.16H, *E* isomer), 7.79 (d, *J* = 2.0 Hz, 0.15H, *E* isomer), 7.73 (d, *J* = 2.0 Hz, 0.85H, *Z* isomer), 7.48 – 7.43 (m, 0.51H, *E* isomer), 7.40 (dd, *J* = 8.9, 2.0 Hz, 1.10H, *Z* isomer), 7.36 – 7.31 (m, 0.33H, *E* isomer), 7.09 (dd, *J* = 5.1, 2.1 Hz, 2.36H, *Z* isomer), 7.05 (t, *J* = 4.7 Hz, 1.02H, *Z* isomer), 6.99 (dd, *J* = 5.1, 2.1 Hz, 1.58H, *Z* isomer), 6.89 (s, 0.11H, *E* isomer), 6.82 (dd, *J* = 17.3, 10.6 Hz, 0.20H, *E* isomer), 6.76 (s, 0.16H, *E* isomer), 6.70 (s, 0.89H, *Z* isomer), 6.70 (dd, *J* = 17.3, 10.6 Hz, 0.80H, *Z* isomer), 6.51 (s, 0.76H, *Z* isomer), 5.08 (d, *J* = 10.6 Hz, 1H, *E* and *Z* isomer), 4.99 (d, *J* = 17.3 Hz, 1H, *E* and *Z* isomer). <sup>13</sup>C NMR (101 MHz, CDCl<sub>3</sub>) *Major isomer*: δ = 158.0 (CH), 157.2 (C<sub>q</sub>), 140.3 (CH), 136.7 (C<sub>q</sub>), 136.5 (C<sub>q</sub>), 135.3 (C<sub>q</sub>), 133.6 (C<sub>q</sub>), 133.3 (CH), 131.2 (C<sub>q</sub>), 129.0 (CH), 128.1 (CH), 127.4 (CH), 126.1 (CH), 123.2 (CH), 117.4 (CH), 115.9 (CH), 115.7 (CH<sub>2</sub>), 115.2 (C<sub>q</sub>), 107.8 (CH). *Minor isomer*: δ = 158.2 (CH), 157.1 (C<sub>q</sub>), 141.7 (CH), 137.1 (C<sub>q</sub>), 135.9 (C<sub>q</sub>), 134.7 (CH), 133.7 (C<sub>q</sub>), 131.4 (CH), 130.9 (C<sub>q</sub>), 129.8 (CH), 128.4 (CH), 127.5 (CH), 126.4 (CH), 123.1 (CH), 117.8 (CH), 117.7 (CH<sub>2</sub>), 115.1 (CH), 108.5 (CH). One C<sub>q</sub> missing due to low signal to noise ratio or signal overlap. IR (ATR): 3049, 1561, 1313, 1264, 1076, 912, 808 cm<sup>-1</sup>. MS (ESI) *m/z* (relative intensity): 278 (47), 402 (54) (<sup>79</sup>Br) [M+H]<sup>+</sup>, 418 (100), 424 (20) (<sup>79</sup>Br) [M+Na]<sup>+</sup>. HR-MS (ESI) *m/z* calcd for C<sub>22</sub>H<sub>17</sub>N<sub>3</sub><sup>79</sup>Br [M+H]<sup>+</sup> 402.0600, found 402.0594.

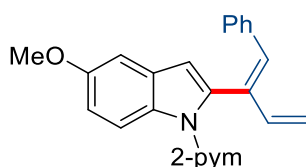

**(Z)-5-Methoxy-2-(1-phenylbuta-1,3-dien-2-yl)-1-(pyrimidin-2-yl)-1H-indole (3ia)**

The general procedure **A** was followed using 5-methoxy-1-(pyrimidin-2-yl)-1H-indole (**1i**) (45.0 mg, 0.20 mmol) and (cyclopropylidene)methylbenzene (**2a**) (41.9 mg, 0.32 mmol) for 2.8 h. Isolation by column chromatography (*n*-hexane/EtOAc 15:1) yielded **3ia** (59.4 mg, 84%, *Z/E*

= 5.7/1 determined by  $^1\text{H}$  NMR spectroscopy) as a yellow solid. **M.p.** = 111–112 °C.  $^1\text{H}$  NMR (400 MHz,  $\text{CDCl}_3$ )  $\delta$  = 8.70 (d,  $J$  = 4.8 Hz, 0.30H, *E* isomer), 8.62 (d,  $J$  = 4.8 Hz, 1.70H, *Z* isomer), 8.32 (d,  $J$  = 9.1 Hz, 0.84H, *Z* isomer), 8.23 (d,  $J$  = 9.1 Hz, 0.16H, *E* isomer), 7.50 – 7.29 (m, 1H, *E* and *Z* isomer), 7.14 – 7.02 (m, 5H, *E* and *Z* isomer), 7.03 – 6.94 (m, 2H, *E* and *Z* isomer), 6.89 (s, 0.16H, *E* isomer), 6.87 (dd,  $J$  = 17.4, 10.5 Hz, 0.15H, *E* isomer), 6.77 (s, 0.15H, *Z* isomer), 6.73 (dd,  $J$  = 17.4, 10.5 Hz, 0.85H, *Z* isomer), 6.70 (s, 0.84H, *Z* isomer), 6.51 (s, 0.85H, *Z* isomer), 5.08 (d,  $J$  = 10.5 Hz, 1H, *E* and *Z* isomer), 5.03 (d,  $J$  = 17.4 Hz, 1H, *E* and *Z* isomer), 3.92 (s, 0.55H, *Z* isomer), 3.91 (s, 2.55H, *Z* isomer).  $^{13}\text{C}$  NMR (101 MHz,  $\text{CDCl}_3$ ) *Major isomer*:  $\delta$  = 157.8 (CH), 157.4 ( $\text{C}_q$ ), 155.5 ( $\text{C}_q$ ), 140.6 (CH), 136.8 ( $\text{C}_q$ ), 136.0 ( $\text{C}_q$ ), 134.3 ( $\text{C}_q$ ), 132.8 (CH), 131.6 ( $\text{C}_q$ ), 130.3 ( $\text{C}_q$ ), 129.1 (CH), 128.1 (CH), 127.2 (CH), 116.8 (CH), 115.6 ( $\text{CH}_2$ ), 115.4 (CH), 112.8 (CH), 108.6 (CH), 102.7 (CH), 55.8 ( $\text{CH}_3$ ). *Minor isomer*:  $\delta$  = 158.0 (CH), 157.9 ( $\text{C}_q$ ), 155.6 ( $\text{C}_q$ ), 141.0 (CH), 137.3 ( $\text{C}_q$ ), 134.9 ( $\text{C}_q$ ), 134.4 ( $\text{C}_q$ ), 132.3 ( $\text{C}_q$ ), 130.6 (CH), 129.9 (CH), 129.6 ( $\text{C}_q$ ), 128.3 (CH), 127.3 (CH), 117.6 ( $\text{CH}_2$ ), 117.1 (CH), 114.6 (CH), 113.0 (CH), 109.4 (CH), 102.7 (CH), 55.9 ( $\text{CH}_3$ ). **IR** (ATR): 3044, 2950, 2249, 1717, 1565, 1421, 1280, 1202, 1106, 908, 804, 728  $\text{cm}^{-1}$ . **MS** (ESI)  $m/z$  (relative intensity): 354 (100)  $[\text{M}+\text{H}]^+$ , 376 (80)  $[\text{M}+\text{Na}]^+$ . **HR-MS** (ESI)  $m/z$  calcd for  $\text{C}_{23}\text{H}_{20}\text{N}_3\text{O}$   $[\text{M}+\text{H}]^+$  354.1601, found 354.1597.

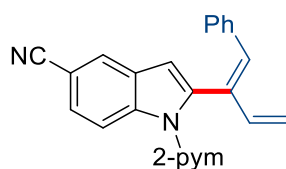

**(Z)-2-(1-Phenylbuta-1,3-dien-2-yl)-1-(pyrimidin-2-yl)-1H-indole-5-carbonitrile (3ja)**

The general procedure **A** was followed using 1-(pyrimidin-2-yl)-1H-indole-5-carbonitrile (**1j**) (44.0 mg, 0.20 mmol) and (cyclopropylidene)methylbenzene (**2a**) (41.9 mg, 0.32 mmol) for 5.0 h. Isolation by column chromatography (*n*-hexane/EtOAc 5:1) yielded **3ja** (46.0 mg, 66%, *Z/E* = 3.2/1 determined by  $^1\text{H}$  NMR spectroscopy) as a yellow solid. The isomeric mixture was separated by GPC ( $\text{CHCl}_3$ ) and the *Z* (18.3 mg, 26%) and the *E* isomer (7.0 mg, 10%) were obtained as a yellow oil and colorless solid, respectively. **Mixture**: **M.p.** = 103–104 °C.  $^1\text{H}$  NMR (300 MHz,  $\text{CDCl}_3$ )  $\delta$  = 8.76 (d,  $J$  = 4.8 Hz, 0.48H, *E* isomer), 8.67 (d,  $J$  = 4.8 Hz, 1.52H, *Z* isomer), 8.34 (d,  $J$  = 8.7 Hz, 0.75H, *Z* isomer),  $\delta$  8.28 (d,  $J$  = 8.7 Hz, 0.25H, *E* isomer), 8.00 (d,  $J$  = 1.5 Hz, 0.23H, *E* isomer), 7.95 (d,  $J$  = 1.5 Hz, 0.77H, *Z* isomer), 7.55 (dd,  $J$  = 8.7, 1.7 Hz, 1H, *E* and *Z* isomer), 7.49 – 7.30 (m, 2H, *E* and *Z* isomer), 7.19 (t,  $J$  = 4.8 Hz, 0.29H, *E* isomer), 7.13 (t,  $J$  = 4.8 Hz, 0.71H, *Z* isomer), 7.11 – 7.06 (m, 2H, *E* and *Z* isomer), 6.99 – 6.93 (m, 1H, *E* and *Z* isomer), 6.90 (s, 0.22H, *E* isomer), 6.86 (s, 0.22H, *E* isomer), 6.80 (dd,  $J$  =

16.9, 10.0 Hz, 0.30H, *E* isomer). 6.73 (s, 0.78H, *Z* isomer), 6.69 (dd,  $J = 16.9, 10.0$  Hz, 0.70H, *Z* isomer), 6.63 (s, 0.78H, *Z* isomer), 5.09 (d,  $J = 10.0$  Hz, 0.78H, *Z* isomer), 5.00 (d,  $J = 10.0$  Hz, 0.22H, *E* isomer), 5.00 (d,  $J = 16.9$  Hz, 0.22H, *E* isomer), 4.97 (d,  $J = 16.9$  Hz, 0.78H, *Z* isomer).  $^{13}\text{C}$  NMR (101 MHz,  $\text{CDCl}_3$ ) *Major isomer*:  $\delta = 158.2$  (CH), 156.8 ( $\text{C}_q$ ), 140.0 (CH), 138.2 ( $\text{C}_q$ ), 138.0 ( $\text{C}_q$ ), 136.3 ( $\text{C}_q$ ), 133.9 (CH), 132.9 ( $\text{C}_q$ ), 129.2 ( $\text{C}_q$ ), 129.0 (CH), 128.2 (CH), 127.6 (CH), 126.3 (CH), 125.9 (CH), 120.4 ( $\text{C}_q$ ), 118.1 (CH), 115.9 ( $\text{CH}_2$ ), 115.0 (CH), 108.3 (CH), 105.2 ( $\text{C}_q$ ). *Minor isomer*:  $\delta = 158.3$  (CH), 157.2 ( $\text{C}_q$ ), 142.9 ( $\text{C}_q$ ), 138.9 ( $\text{C}_q$ ), 136.7 ( $\text{C}_q$ ), 134.3 (CH), 133.1 ( $\text{C}_q$ ) 132.2 (CH), 129.8 (CH), 129.5 ( $\text{C}_q$ ) 128.4 (CH), 127.6 (CH), 126.5 (CH), 125.7 (CH), 118.4 (CH), 118.0 ( $\text{CH}_2$ ), 114.3 (CH), 108.7 (CH), 105.0 ( $\text{C}_q$ ). One  $\text{C}_q$  is missing due to signal overlap. IR (ATR): 3050, 2921, 2221, 1608, 1565, 1415, 1316, 1217, 1030, 986, 886, 809, 735  $\text{cm}^{-1}$ . MS (ESI)  $m/z$  (relative intensity): 349 (90)  $[\text{M}+\text{H}]^+$ , 371 (100)  $[\text{M}+\text{Na}]^+$ . HR-MS (ESI)  $m/z$  calcd for  $\text{C}_{23}\text{H}_{17}\text{N}_4$   $[\text{M}+\text{H}]^+$  349.1448, found 349.1440.

**Isolated (*Z*)-3ja**:  $^1\text{H}$  NMR (300 MHz,  $\text{CDCl}_3$ )  $\delta = 8.67$  (d,  $J = 4.9$  Hz, 2H), 8.34 (d,  $J = 8.7$  Hz, 1H), 7.95 (d,  $J = 1.5$  Hz, 1H), 7.55 (dd,  $J = 8.7, 1.5$  Hz, 1H), 7.13 (t,  $J = 4.8$  Hz, 1H), 7.11 – 7.06 (m, 3H), 6.97 (d,  $J = 2.2$  Hz, 1H), 6.95 (d,  $J = 2.2$  Hz, 1H), 6.73 (s, 1H), 6.69 (dd,  $J = 16.9, 10.0$  Hz, 1H), 6.63 (s, 1H), 5.09 (d,  $J = 10.0$  Hz, 1H), 4.97 (d,  $J = 16.9$  Hz, 1H).  $^{13}\text{C}$  NMR (101 MHz,  $\text{CDCl}_3$ )  $\delta = 158.2$  (CH), 156.8 ( $\text{C}_q$ ), 140.0 (CH), 138.2 ( $\text{C}_q$ ), 138.1 ( $\text{C}_q$ ), 136.3 ( $\text{C}_q$ ), 133.9 (CH), 132.9 ( $\text{C}_q$ ), 129.2 ( $\text{C}_q$ ), 129.0 (CH), 128.2 (CH), 127.6 (CH), 126.3 (CH), 125.9 (CH), 120.4 ( $\text{C}_q$ ), 118.1 (CH), 115.9 ( $\text{CH}_2$ ), 115.0 (CH), 108.3 (CH), 105.2 ( $\text{C}_q$ ). IR (ATR): 3015, 2221, 1608, 1565, 1419, 1315, 1218, 909, 810, 730  $\text{cm}^{-1}$ . MS (ESI)  $m/z$  (relative intensity): 349 (100)  $[\text{M}+\text{H}]^+$ , 371 (65)  $[\text{M}+\text{Na}]^+$ . HR-MS (ESI)  $m/z$  calcd for  $\text{C}_{23}\text{H}_{17}\text{N}_4$   $[\text{M}+\text{H}]^+$  349.1448, found 349.1448.

**Isolated (*E*)-3ja**: M.p. = 133–134 °C.  $^1\text{H}$  NMR (300 MHz,  $\text{CDCl}_3$ )  $\delta = 8.74$  (d,  $J = 4.8$  Hz, 2H), 8.25 (d,  $J = 8.7$  Hz, 1H), 7.98 (d,  $J = 1.5$  Hz, 1H), 7.52 (dd,  $J = 8.7, 1.6$  Hz, 1H), 7.44 – 7.28 (m, 5H), 7.17 (t,  $J = 4.8$  Hz, 1H), 6.88 (s, 1H), 6.84 (s, 1H), 6.77 (dd,  $J = 16.9, 10.0$  Hz, 1H), 4.98 (d,  $J = 16.9$  Hz, 1H), 4.98 (d,  $J = 10.0$  Hz, 1H).  $^{13}\text{C}$  NMR (101 MHz,  $\text{CDCl}_3$ )  $\delta = 158.4$  (CH), 157.4 ( $\text{C}_q$ ), 142.9 ( $\text{C}_q$ ), 138.9 ( $\text{C}_q$ ), 136.8 ( $\text{C}_q$ ), 134.4 (CH), 133.1 ( $\text{C}_q$ ), 132.2 (CH), 129.8 (CH), 129.0 ( $\text{C}_q$ ), 128.4 (CH), 127.8 (CH), 126.6 (CH), 125.7 (CH), 120.5 ( $\text{C}_q$ ), 118.4 (CH), 118.0 ( $\text{CH}_2$ ), 114.3 (CH), 108.7 (CH), 105.2 ( $\text{C}_q$ ). IR (ATR): 3125, 2219, 1590, 1456, 1417, 1321, 1218, 914, 810, 701  $\text{cm}^{-1}$ . MS (ESI)  $m/z$  (relative intensity): 349 (100)  $[\text{M}+\text{H}]^+$ , 371 (65)  $[\text{M}+\text{Na}]^+$ . HR-MS (ESI)  $m/z$  calcd for  $\text{C}_{23}\text{H}_{17}\text{N}_4$   $[\text{M}+\text{H}]^+$  349.1448, found 349.1447.



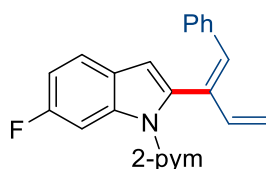

**(Z)-6-Fluoro-2-(1-phenylbuta-1,3-dien-2-yl)-1-(pyrimidin-2-yl)-1H-indole (3ka)**

The general procedure **A** was followed using 6-fluoro-1-(pyrimidin-2-yl)-1H-indole (**1k**) (42.6 mg, 0.20 mmol) and (cyclopropylidene)methylbenzene (**2a**) (41.6 mg, 0.32 mmol) for 5.0 h. Isolation by column chromatography (*n*-hexane/EtOAc 15:1) yielded **3ka** (42.3 mg, 62%, *Z/E* = 2.7/1 determined by <sup>1</sup>H NMR spectroscopy) as a yellow oil. <sup>1</sup>H NMR (300 MHz, CDCl<sub>3</sub>) δ = 8.73 (d, *J* = 4.8 Hz, 0.55H, *E* isomer), 8.64 (d, *J* = 4.8 Hz, 1.45H, *Z* isomer), 8.12 (dd, *J* = 10.8, 2.4 Hz, 0.73H, *E* isomer), 8.04 (dd, *J* = 10.8, 2.4 Hz, 0.27H, *Z* isomer), 7.57 (dd, *J* = 8.6, 5.5 Hz, 0.27H, *Z* isomer), 7.51 (dd, *J* = 8.6, 5.5 Hz, 0.73H, *E* isomer), 7.47 – 7.38 (m, 1.39H, *Z* isomer), 7.32 (dd, *J* = 7.1, 2.4 Hz, 0.27H, *Z* isomer), 7.18 (t, *J* = 4.8 Hz, 0.27H, *Z* isomer), 7.12 – 7.07 (m, 2H, *Z* isomer), 7.05 – 6.99 (m, 3H, *Z* isomer), 6.73 (dd, *J* = 17.6, 10.8 Hz, 0.27H, *E* isomer), 6.88 (s, 0.27H, *E* isomer), 6.83 (dd, *J* = 17.3, 10.8 Hz, 0.27H, *E* isomer), 6.79 (s, 0.29H, *E* isomer), 6.71 (dd, *J* = 17.3, 10.8 Hz, 0.73H, *Z* isomer), 6.69 (s, 0.71H, *Z* isomer), 6.54 (s, 0.73H, *Z* isomer), 5.10 (d, *J* = 10.8 Hz, 1H, *E* and *Z* isomer), 5.05 (d, *J* = 17.5 Hz, 1H, *E* and *Z* isomer). <sup>13</sup>C NMR (101 MHz, CDCl<sub>3</sub>) *Major isomer*: δ = 160.6 (d, <sup>1</sup>*J*<sub>C-F</sub> = 238.2 Hz, C<sub>q</sub>), 157.9 (CH), 157.3 (C<sub>q</sub>), 140.5 (CH), 137.2 (C<sub>q</sub>), 136.7 (C<sub>q</sub>), 135.8 (d, <sup>4</sup>*J*<sub>C-F</sub> = 4.2 Hz, C<sub>q</sub>), 133.9 (C<sub>q</sub>), 133.0 (CH), 129.1 (CH), 128.1 (CH), 127.2 (CH), 125.9 (C<sub>q</sub>), 121.3 (d, <sup>3</sup>*J*<sub>C-F</sub> = 10.0 Hz, CH), 117.2 (CH), 115.7 (CH<sub>2</sub>), 110.5 (d, <sup>2</sup>*J*<sub>C-F</sub> = 24.8 Hz, CH), 108.5 (CH), 101.6 (d, <sup>2</sup>*J*<sub>C-F</sub> = 28.5 Hz, CH). *Minor isomer*: δ = 161.2 (d, <sup>1</sup>*J*<sub>C-F</sub> = 238.2 Hz, C<sub>q</sub>), 158.2 (CH), 157.8 (C<sub>q</sub>), 140.9 (CH), 136.8 (C<sub>q</sub>), 136.7 (C<sub>q</sub>), 134.0 (C<sub>q</sub>), 130.8 (CH), 129.8 (CH), 128.3 (CH), 127.4 (CH), 125.3 (C<sub>q</sub>), 121.2 (CH), 121.1 (CH), 115.7 (CH<sub>2</sub>), 109.2 (CH), 107.7 (d, <sup>2</sup>*J*<sub>C-F</sub> = 24.8 Hz, CH), 108.8 (d, <sup>2</sup>*J*<sub>C-F</sub> = 28.5 Hz, CH). One C<sub>q</sub> is missing due to low signal to noise ratio or signal overlap. <sup>19</sup>F NMR (377 MHz, CDCl<sub>3</sub>) δ = -118.5 – -118.6 (m, *E* isomer), -118.9 – -119.0 (m, *Z* isomer). IR (ATR): 3050, 1724, 1566, 1418, 1261, 1077, 986 cm<sup>-1</sup>. MS (ESI) *m/z* (relative intensity): 342 (100) [M+H]<sup>+</sup>, 364 (20) [M+Na]<sup>+</sup>. HR-MS (ESI) *m/z* calcd for C<sub>22</sub>H<sub>17</sub>N<sub>3</sub>F [M+H]<sup>+</sup> 342.1401, found 342.1398.

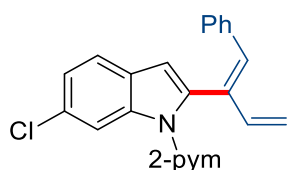

**(Z)-6-Chloro-2-(1-phenylbuta-1,3-dien-2-yl)-1-(pyrimidin-2-yl)-1H-indole (3la)**



The general procedure **A** was followed using 6-chloro-1-(pyrimidin-2-yl)-1*H*-indole (**1l**) (45.9 mg, 0.20 mmol) and (cyclopropylidene)methylbenzene (**2a**) (41.6 mg, 0.32 mmol) for 4.0 h. Isolation by column chromatography (*n*-hexane/EtOAc 15:1) yielded **3la** (43.7 mg, 61%, *Z/E* = 2.2/1 determined by <sup>1</sup>H NMR spectroscopy) as a yellow oil. <sup>1</sup>H NMR (400 MHz, CDCl<sub>3</sub>) δ = 8.74 (d, *J* = 4.8 Hz, 0.62H, *E* isomer), 8.65 (d, *J* = 4.8 Hz, 1.38H, *Z* isomer), 8.39 (d, *J* = 1.9 Hz, 0.69H, *Z* isomer), 8.31 (d, *J* = 1.9 Hz, 0.31H, *E* isomer), 7.57 (d, *J* = 8.3 Hz, 0.31H, *E* isomer), 7.50 (d, *J* = 8.3 Hz, 0.69H, *E* isomer), 7.47 – 7.38 (m, 2H, *E* and *Z* isomer), 7.34 – 7.31 (m, 0.32H, *E* isomer), 7.23 (dd, *J* = 8.4, 1.9 Hz, 0.32H, *E* isomer), 7.23 (dd, *J* = 8.4, 1.9 Hz, 0.68H, *Z* isomer), 7.13 (t, *J* = 4.8 Hz, 0.34H, *E* isomer), 7.12 – 7.07 (m, 2H, *E* and *Z* isomer), 7.06 (t, *J* = 4.8 Hz, 0.68H, *Z* isomer), 7.01 – 6.98 (m, 1H, *E* isomer), 6.89 (s, 0.32H, *E* isomer), 6.82 (dd, *J* = 17.1, 10.4 Hz, 0.33H, *E* isomer), 6.78 (s, 0.32H, *Z* isomer), 6.69 (s, 0.68H, *Z* isomer), 6.69 (dd, *J* = 17.1, 10.4 Hz, 0.67H, *Z* isomer), 6.53 (s, 0.68H, *Z* isomer), 5.07 (d, *J* = 10.4 Hz, 0.88H, *Z* isomer), 4.99 (d, *J* = 17.1 Hz, 1H, *E* and *Z* isomer). <sup>13</sup>C NMR (101 MHz, CDCl<sub>3</sub>) *Major isomer*: δ = 158.0 (CH), 157.2 (C<sub>q</sub>), 140.4 (CH), 136.9 (C<sub>q</sub>), 136.6 (C<sub>q</sub>), 136.2 (C<sub>q</sub>), 133.7 (C<sub>q</sub>), 133.2 (CH), 129.3 (C<sub>q</sub>), 129.1 (CH), 128.1 (CH), 128.0 (C<sub>q</sub>), 127.3 (CH), 122.6 (CH), 121.5 (CH), 117.4 (CH), 115.7 (CH<sub>2</sub>), 114.5 (CH), 108.4 (CH). *Minor isomer*: δ = 158.3 (CH), 157.7 (C<sub>q</sub>), 141.2 (CH), 137.6 (C<sub>q</sub>), 137.2 (C<sub>q</sub>), 136.6 (C<sub>q</sub>), 134.7 (CH), 131.2 (C<sub>q</sub>), 129.8 (CH), 129.5 (C<sub>q</sub>), 128.4 (CH), 127.7 (C<sub>q</sub>), 127.5 (CH), 122.7 (CH), 121.4 (CH), 117.7 (CH<sub>2</sub>), 117.7 (CH), 113.7 (CH), 109.1 (CH). IR (ATR): 3051, 1709, 1567, 1426, 1352, 1315, 1264, 1218, 908, 811 cm<sup>-1</sup>. MS (ESI) *m/z* (relative intensity): 358 (80) (<sup>35</sup>Cl) [M+H]<sup>+</sup>, 380 (100) (<sup>35</sup>Cl) [M+Na]<sup>+</sup>. HR-MS (ESI) *m/z* calcd for C<sub>22</sub>H<sub>16</sub>N<sub>3</sub><sup>35</sup>ClNa [M+Na]<sup>+</sup> 380.0925, found 380.0925.

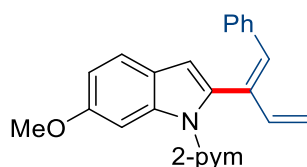

**(Z)-6-Methoxy-2-(1-phenylbuta-1,3-dien-2-yl)-1-(pyrimidin-2-yl)-1*H*-indole (**3ma**)**

The general procedure **A** was followed using 6-methoxy-1-(pyrimidin-2-yl)-1*H*-indole (**1m**) (45.0 mg, 0.20 mmol) and (cyclopropylidene)methylbenzene (**2a**) (41.6 mg, 0.32 mmol) for 3.0 h. Isolation by column chromatography (*n*-hexane/EtOAc 10:1) yielded **3ma** (43.1 mg, 61%, *Z/E* = 3.6/1 determined by <sup>1</sup>H NMR spectroscopy) as a yellow oil. <sup>1</sup>H NMR (300 MHz, CDCl<sub>3</sub>) δ = 8.72 (d, *J* = 4.8 Hz, 0.42H, *E* isomer), 8.63 (d, *J* = 4.8 Hz, 1.58H, *Z* isomer), 7.96 (d, *J* = 2.3 Hz, 0.79H, *Z* isomer), 7.87 (d, *J* = 2.3 Hz, 0.21H, *E* isomer), 7.54 (d, *J* = 8.6 Hz, 0.21H, *E* isomer), 7.48 (d, *J* = 8.5 Hz, 0.79H, *Z* isomer), 7.44 – 7.36 (m, 0.89H, *Z* isomer), 7.33 – 7.29 (m, 0.21H, *E* isomer), 7.12 – 7.06 (m, 4H, *E* and *Z* isomer), 7.02 (t, *J* = 4.8 Hz, 0.80H, *Z* isomer),

6.92 (dd,  $J = 8.5, 2.3$  Hz, 1H, *E* and *Z* isomer), 6.87 (s, 0.23H, *E* isomer), 6.83 (dd,  $J = 17.3, 10.5$  Hz, 0.23H, *E* isomer), 6.76 (s, 0.26H, *E* isomer), 6.71 (dd,  $J = 17.3, 10.5$  Hz, 0.77H, *Z* isomer), 6.66 (s, 0.77H, *Z* isomer), 6.49 (s, 0.79H, *Z* isomer), 5.08 (d,  $J = 17.3$  Hz, 0.21H, *E* isomer), 5.05 (d,  $J = 10.5$  Hz, 0.79H, *Z* isomer), 5.02 (d,  $J = 17.3$  Hz, 0.79H, *Z* isomer), 4.99 (d,  $J = 10.5$  Hz, 0.21H, *E* isomer), 3.92 (s, 3H, *E* and *Z* isomer).  $^{13}\text{C}$  NMR (126 MHz,  $\text{CDCl}_3$ ) *Major isomer*:  $\delta = 157.9$  (CH), 157.6 ( $\text{C}_q$ ), 157.3 ( $\text{C}_q$ ), 140.8 (CH), 137.6 ( $\text{C}_q$ ), 136.9 ( $\text{C}_q$ ), 134.3 ( $\text{C}_q$ ), 134.2 ( $\text{C}_q$ ), 132.6 (CH), 129.2 (CH), 128.1 (CH), 127.1 (CH), 123.7 ( $\text{C}_q$ ), 121.2 (CH), 116.9 (CH), 115.6 ( $\text{CH}_2$ ), 111.3 (CH), 108.6 (CH), 98.7 (CH), 55.9 ( $\text{CH}_3$ ). *Minor isomer*:  $\delta = 158.1$  (CH), 157.8 ( $\text{C}_q$ ), 157.6 ( $\text{C}_q$ ), 139.5 (CH), 138.2 ( $\text{C}_q$ ), 137.4 ( $\text{C}_q$ ), 134.9 ( $\text{C}_q$ ), 134.3 ( $\text{C}_q$ ), 130.2 (CH), 129.8 (CH), 128.3 (CH), 127.3 (CH), 123.3 ( $\text{C}_q$ ), 121.1 (CH), 117.6 ( $\text{CH}_2$ ), 117.2 (CH), 111.3 (CH), 109.4 (CH), 97.8 (CH). One  $\text{CH}_3$  is missing due to signal overlap. IR (ATR): 2924, 1948, 1612, 1565, 1484, 1418, 1265, 1159, 906, 728  $\text{cm}^{-1}$ . MS (ESI)  $m/z$  (relative intensity): 354 (100)  $[\text{M}+\text{H}]^+$ , 376 (80)  $[\text{M}+\text{Na}]^+$ . HR-MS (ESI)  $m/z$  calcd for  $\text{C}_{23}\text{H}_{20}\text{N}_3\text{O}$   $[\text{M}+\text{H}]^+$  354.1606, found 354.1590.

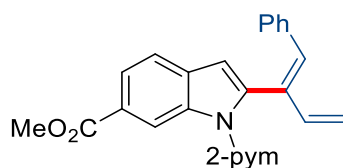

**Methyl (Z)-2-(1-phenylbuta-1,3-dien-2-yl)-1-(pyrimidin-2-yl)-1H-indole-6-carboxylate (3na)**

The general procedure **A** was followed using 1-(pyrimidin-2-yl)-1H-indole-6-carboxylate (**1n**) (50.7 mg, 0.20 mmol) and (cyclopropylidene)methylbenzene (**2a**) (41.9 mg, 0.32 mmol) for 3.0 h. Isolation by column chromatography (*n*-hexane/EtOAc 5:1) yielded **3na** (59.5 mg, 78%, *Z/E* = 3.8/1 determined by  $^1\text{H}$  NMR spectroscopy) as a yellow oil.  $^1\text{H}$  NMR (300 MHz,  $\text{CDCl}_3$ )  $\delta = 9.00$  (s, 0.79H, *Z* isomer), 8.92 (s, 0.21H, *E* isomer), 8.77 (d,  $J = 4.8$  Hz, 0.42H, *E* isomer), 8.68 (d,  $J = 4.8$  Hz, 1.58H, *Z* isomer), 7.96 (d,  $J = 8.3$  Hz, 1H, *E* and *Z* isomer), 7.69 (d,  $J = 8.3$  Hz, 0.21H, *E* isomer), 7.63 (d,  $J = 8.3$  Hz, 0.79H, *Z* isomer), 7.40 (d,  $J = 7.6$  Hz, 1H, *E* and *Z* isomer), 7.33 (d,  $J = 6.7$  Hz, 0.22H, *E* isomer), 7.15 (t,  $J = 4.8$  Hz, 0.25H, *E* isomer), 7.11 – 6.98 (m, 5H, *E* and *Z* isomer), 6.92 (s, 0.21H, *E* isomer), 6.86 (dd,  $J = 17.2, 10.5$  Hz, 0.23H, *E* isomer), 6.86 (s, 0.19H, *E* isomer), 6.72 (s, 0.77H, *Z* isomer), 6.70 (dd,  $J = 17.2, 10.5$  Hz, 0.81H, *Z* isomer), 6.61 (s, 0.79H, *Z* isomer), 5.08 (d,  $J = 10.5$  Hz, 1H, *E* and *Z* isomer), 5.00 (d,  $J = 17.2$  Hz, 1H, *E* and *Z* isomer), 3.97 (s, 3H, *E* and *Z* isomer).  $^{13}\text{C}$  NMR (101 MHz,  $\text{CDCl}_3$ ) *Major isomer*:  $\delta = 168.2$  ( $\text{C}_q$ ), 158.1 (CH), 157.1 ( $\text{C}_q$ ), 140.1 (CH), 138.8 ( $\text{C}_q$ ), 136.4 ( $\text{C}_q$ ), 136.0 ( $\text{C}_q$ ), 133.6 (CH), 133.4 ( $\text{C}_q$ ), 133.1 ( $\text{C}_q$ ), 129.0 (CH), 128.2 (CH), 127.4 (CH), 125.1 ( $\text{C}_q$ ), 123.1

(CH), 120.4 (CH), 117.6 (CH), 116.3 (CH), 115.8 (CH<sub>2</sub>), 108.4 (CH), 52.1 (CH<sub>3</sub>). *Minor isomer*:  $\delta$  = 168.1 (C<sub>q</sub>), 158.4 (CH), 158.0 (C<sub>q</sub>), 143.7 (CH), 137.0 (C<sub>q</sub>), 136.7 (C<sub>q</sub>), 134.4 (CH), 132.8 (C<sub>q</sub>), 131.8 (C<sub>q</sub>), 129.8 (CH), 128.4 (CH), 127.6 (CH), 125.2 (C<sub>q</sub>), 123.2 (CH), 120.3 (CH), 118.0 (CH<sub>2</sub>), 117.9 (CH), 115.5 (CH), 109.0 (CH), 52.1 (CH<sub>3</sub>). One C<sub>q</sub> is missing due to low signal to noise ratio or signal overlap. **IR** (ATR): 3052, 2950, 1709, 1566, 1421, 1361, 1276, 1217, 1092, 990, 804, 732 cm<sup>-1</sup>. **MS** (ESI) *m/z* (relative intensity): 382 (100) [M+H]<sup>+</sup>, 404 (75) [M+Na]<sup>+</sup>. **HR-MS** (ESI) *m/z* calcd for C<sub>24</sub>H<sub>20</sub>N<sub>3</sub>O<sub>2</sub> [M+H]<sup>+</sup> 382.1550, found 382.1543.

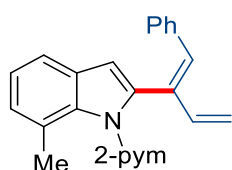

### (Z)-7-Methyl-2-(1-phenylbuta-1,3-dien-2-yl)-1-(pyrimidin-2-yl)-1H-indole (30a)

The general procedure **A** was followed using 7-methyl-1-(pyrimidin-2-yl)-1H-indole (**1o**) (41.8 mg, 0.20 mmol) and (cyclopropylidene)methylbenzene (**2a**) (41.9 mg, 0.32 mmol) for 3.0 h. Isolation by column chromatography (*n*-hexane/EtOAc 15:1) yielded **3na** (41.2 mg, 61%, *Z/E* = 3.6/1 determined by <sup>1</sup>H NMR spectroscopy) as a yellow oil. **<sup>1</sup>H NMR** (400 MHz, CDCl<sub>3</sub>)  $\delta$  = 8.78 (d, *J* = 4.8 Hz, 0.43H, *E* isomer), 8.64 (d, *J* = 4.8 Hz, 1.57H, *Z* isomer), 7.59 (d, *J* = 7.8 Hz, 0.22H, *E* isomer), 7.55 (d, *J* = 7.8 Hz, 0.78H, *Z* isomer), 7.42 – 7.29 (m, 1H, *E* and *Z* isomer), 7.22 – 7.18 (m, 1H, *E* and *Z* isomer), 7.15 – 7.11 (m, 5H, *E* and *Z* isomer), 7.10 (t, *J* = 4.8 Hz, 1H, *E* and *Z* isomer), 6.81 (s, 0.22H, *E* isomer), 6.79 (s, 0.22H, *E* isomer), 6.72 (dd, *J* = 17.0, 10.6, 0.78 Hz, 0.22H, *E* isomer), 6.69 (s, 0.78H, *Z* isomer), 6.59 (s, 0.78H, *Z* isomer), 6.58 (dd, *J* = 17.0, 10.6 Hz, 0.78H, *Z* isomer), 5.19 (d, *J* = 17.0 Hz, 0.22H, *E* isomer), 5.07 (d, *J* = 10.6 Hz, 1H, *E* and *Z* isomer), 5.00 (d, *J* = 17.0, 0.78H, *Z* isomer), 2.14 (s, 2.44H, *Z* isomer), 2.11 (s, 0.66H, *E* isomer). **<sup>13</sup>C NMR** (75 MHz, CDCl<sub>3</sub>) *Major isomer*:  $\delta$  = 158.1 (C<sub>q</sub>), 157.6 (CH), 140.2 (CH), 136.4 (C<sub>q</sub>), 136.2 (C<sub>q</sub>), 136.2 (C<sub>q</sub>), 135.1 (CH), 132.7 (C<sub>q</sub>), 129.9 (C<sub>q</sub>), 129.3 (CH), 128.1 (CH), 127.5 (CH), 125.9 (CH), 122.7 (C<sub>q</sub>), 121.5 (CH), 118.8 (CH), 118.5 (CH), 116.5 (CH<sub>2</sub>), 106.6 (CH), 20.7 (CH<sub>3</sub>). *Minor isomer*:  $\delta$  = 159.0 (C<sub>q</sub>), 158.0 (CH), 140.9 (CH), 136.9 (C<sub>q</sub>), 133.5 (CH), 133.4 (C<sub>q</sub>), 133.3 (C<sub>q</sub>), 132.8 (C<sub>q</sub>), 129.6 (CH), 129.5 (C<sub>q</sub>), 128.3 (CH), 127.4 (CH), 126.0 (CH), 122.0 (C<sub>q</sub>), 121.4 (CH), 119.3 (CH<sub>2</sub>), 119.1 (CH), 118.7 (CH), 107.2 (CH), 20.5 (CH<sub>3</sub>). **IR** (ATR): 3051, 1691, 1567, 1422, 1309, 1208, 1058, 913, 868, 733 cm<sup>-1</sup>. **MS** (ESI) *m/z* (relative intensity): 338 (80) [M+H]<sup>+</sup>, 360 (25) [M+Na]<sup>+</sup>. **HR-MS** (ESI) *m/z* calcd for C<sub>23</sub>H<sub>20</sub>N<sub>3</sub> [M+H]<sup>+</sup> 338.1652, found 338.1647.

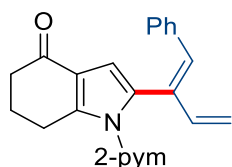

**(Z)-2-(1-phenylbuta-1,3-dien-2-yl)-1-(pyrimidin-2-yl)-1,5,6,7-tetrahydro-4H-indol-4-one (3pa)**

The general procedure **A** was followed using 1-(pyrimidin-2-yl)-1,5,6,7-tetrahydro-4H-indol-4-one (**1p**) (42.4 mg, 0.20 mmol) and (cyclopropylidene)methylbenzene (**2a**) (41.9 mg, 0.32 mmol) for 3.0 h. Isolation by column chromatography (*n*-hexane/EtOAc 3:1) yielded (*Z*)-**3pa** (38.7 mg, 57%) as a yellow solid and (*E*)-**3pa** (19.2 mg, 28%) as a yellow solid. (*Z*)-**3pa**: **M.p.** = 148–150 °C. **<sup>1</sup>H NMR** (400 MHz, CDCl<sub>3</sub>)  $\delta$  = 8.54 (d, *J* = 4.8 Hz, 2H), 7.13 – 7.05 (m, 4H), 6.88 – 6.82 (m, 2H), 6.64 (s, 1H), 6.60 (dd, *J* = 17.2, 10.5 Hz, 1H), 6.49 (s, 1H), 5.24 (d, *J* = 17.2 Hz, 1H), 5.14 (d, *J* = 10.5 Hz, 1H), 3.02 (t, *J* = 6.0 Hz, 2H), 2.60 (t, *J* = 6.4 Hz, 2H), 2.18 (tt, *J* = 6.0, 6.4 Hz, 2H). **<sup>13</sup>C NMR** (101 MHz, CDCl<sub>3</sub>)  $\delta$  = 195.2 (C<sub>q</sub>), 157.9 (CH), 156.2 (C<sub>q</sub>), 145.6 (C<sub>q</sub>), 140.1 (CH), 136.4 (C<sub>q</sub>), 133.4 (CH), 132.3 (C<sub>q</sub>), 130.1 (C<sub>q</sub>), 128.8 (CH), 128.1 (CH), 127.3 (CH), 122.3 (C<sub>q</sub>), 118.7 (CH), 116.1 (CH<sub>2</sub>), 109.4 (CH), 38.1 (CH<sub>2</sub>), 24.3 (CH<sub>2</sub>), 24.0 (CH<sub>2</sub>). **IR** (ATR): 3051, 2945, 1657, 1562, 1413, 1261, 1179, 996, 903, 821, 730, 695 cm<sup>-1</sup>. **MS** (ESI) *m/z* (relative intensity): 342 (100) [M+H]<sup>+</sup>, 364(20) [M+Na]<sup>+</sup>. **HR-MS** (ESI) *m/z* calcd for C<sub>22</sub>H<sub>20</sub>N<sub>3</sub>O [M+H]<sup>+</sup> 342.1601, found 342.1601.

(*E*)-**3pa**: **M.p.** = 129–131 °C. **<sup>1</sup>H NMR** (400 MHz, CDCl<sub>3</sub>)  $\delta$  = 8.73 (d, *J* = 4.8 Hz, 2H), 7.35 (d, *J* = 4.4 Hz, 3H), 7.32–7.25 (m, 2H), 7.22 (t, *J* = 4.9 Hz, 1H), 6.79 (s, 1H), 6.73 (s, 1H), 6.64 (dd, *J* = 17.5, 10.8 Hz, 1H), 5.05 (d, *J* = 17.5 Hz, 1H), 4.94 (d, *J* = 10.8 Hz, 1H), 3.02 (t, *J* = 6.1 Hz, 2H), 2.58 (t, *J* = 6.4 Hz, 2H), 2.19 (tt, *J* = 6.1, 6.4 Hz, 2H). **<sup>13</sup>C NMR** (101 MHz, CDCl<sub>3</sub>)  $\delta$  = 194.9 (C<sub>q</sub>), 158.5 (CH), 157.1 (C<sub>q</sub>), 145.8 (C<sub>q</sub>), 137.1 (C<sub>q</sub>), 135.8 (C<sub>q</sub>), 134.2 (CH), 132.5 (C<sub>q</sub>), 131.4 (CH), 129.7 (CH), 128.3 (CH), 127.4 (CH), 121.9 (C<sub>q</sub>), 119.2 (CH), 118.0 (CH<sub>2</sub>), 109.3 (CH), 38.1 (CH<sub>2</sub>), 24.1 (CH<sub>2</sub>), 23.9 (CH<sub>2</sub>). **IR** (ATR): 3051, 2926, 1727, 1658, 1564, 1418, 1265, 1182, 1000, 910, 733, 700 cm<sup>-1</sup>. **MS** (ESI) *m/z* (relative intensity): 342 (100) [M+H]<sup>+</sup>, 364 (70) [M+Na]<sup>+</sup>. **HR-MS** (ESI) *m/z* calcd for C<sub>22</sub>H<sub>20</sub>N<sub>3</sub>O [M+H]<sup>+</sup> 342.1601, found 342.1606.

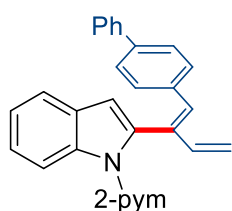

**(Z)-2-{1-[(1,1'-Biphenyl)-4-yl]buta-1,3-dien-2-yl}-1-(pyrimidin-2-yl)-1H-indole (3ab)**

The general procedure **A** was followed using 1-(pyrimidin-2-yl)-1H-indole (**1a**) (39.0 mg, 0.20

mmol) and 4-(cyclopropylidenemethyl)-1,1'-biphenyl (**2b**) (66.0 mg, 0.32 mmol) for 3.0 h. Isolation by column chromatography (*n*-hexane/EtOAc 15:1) yielded **3ab** (64.7 mg, 81%, *Z/E* = 3.4/1 determined by <sup>1</sup>H NMR spectroscopy) as a yellow solid. **M.p.** = 127–128 °C. **<sup>1</sup>H NMR** (400 MHz, CDCl<sub>3</sub>) δ 8.74 (d, *J* = 4.8 Hz, 0.46H, *Z* isomer), 8.65 (d, *J* = 4.8 Hz, 1.54H, *E* isomer), 8.40 (d, *J* = 8.3 Hz, 0.77H, *E* isomer), 8.28 (d, *J* = 8.3 Hz, 0.23H, *Z* isomer), 7.71 – 7.63 (m, 2H, *E* and *Z* isomer), 7.55 – 7.47 (m, 3H, *E* and *Z* isomer), 7.39 – 7.32 (m, 5H, *E* and *Z* isomer), 7.15 (d, *J* = 8.0 Hz, 1H, *E* and *Z* isomer), 7.10 (t, *J* = 4.8 Hz, 0.34H, *Z* isomer), 7.04 (t, *J* = 4.8 Hz, 0.66H, *Z* isomer), 6.94 (s, 0.26H, *Z* isomer), 6.90 (dd, *J* = 17.3, 10.6 Hz, 0.37H, *Z* isomer), 6.86 (s, 0.20H, *Z* isomer), 6.75 (s, 0.80H, *E* isomer), 6.72 (dd, *J* = 17.3, 10.6 Hz, 0.65H), 6.61 (s, 0.82H, *E* isomer), 5.12 (d, *J* = 17.3 Hz, 0.22H, *Z* isomer), 5.07 (d, *J* = 10.6 Hz, 1H, *E* and *Z* isomer), 5.00 (d, *J* = 17.3 Hz, 0.78H, *E* isomer). **<sup>13</sup>C NMR** (126 MHz, CDCl<sub>3</sub>) *Major isomer*: δ = 158.0 (CH), 157.6 (C<sub>q</sub>), 140.7 (CH), 140.6 (C<sub>q</sub>), 139.7 (C<sub>q</sub>), 136.7 (C<sub>q</sub>), 135.8 (C<sub>q</sub>), 135.5 (C<sub>q</sub>), 134.2 (C<sub>q</sub>), 132.7 (CH), 129.6 (CH), 129.6 (C<sub>q</sub>), 128.8 (CH), 127.3 (CH), 126.9 (CH), 126.7 (CH), 123.4 (CH), 122.0 (CH), 120.8 (CH), 117.1 (CH), 115.7 (CH<sub>2</sub>), 114.4 (CH), 108.6 (CH). *Minor isomer*: δ = 158.2 (CH), 158.0 (C<sub>q</sub>), 140.8 (CH), 140.1 (C<sub>q</sub>), 137.4 (C<sub>q</sub>), 136.4 (C<sub>q</sub>), 134.9 (C<sub>q</sub>), 134.3 (C<sub>q</sub>), 134.2 (CH), 130.4 (CH), 130.3 (C<sub>q</sub>), 129.0 (CH), 127.5 (CH), 127.1 (CH), 127.0 (CH), 123.7 (CH), 122.1 (CH), 120.7 (CH), 117.9 (CH<sub>2</sub>), 117.4 (CH), 113.4 (CH), 109.5 (CH). One C<sub>q</sub> is missing due to low signal to noise ratio or signal overlap. **IR** (ATR): 3032, 1716, 1688, 1564, 1420, 1347, 1305, 1212, 904, 804 cm<sup>-1</sup>. **MS** (ESI) *m/z* (relative intensity): 400 (100) [M+H]<sup>+</sup>, 422 (90) [M+Na]<sup>+</sup>. **HR-MS** (ESI) *m/z* calcd for C<sub>28</sub>H<sub>22</sub>N<sub>3</sub> [M+H]<sup>+</sup> 400.1808, found 400.1806.

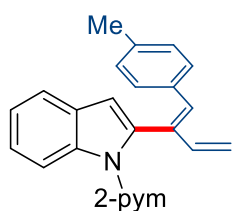

**(Z)-1-(Pyrimidin-2-yl)-2-[1-(p-tolyl)buta-1,3-dien-2-yl]-1H-indole (**3ac**)**

The general procedure **A** was followed using 1-(pyrimidin-2-yl)-1H-indole (**1a**) (39.0 mg, 0.20 mmol) and 1-(cyclopropylidenemethyl)-4-methylbenzene (**2c**) (46.1 mg, 0.32 mmol) for 3.0 h. Isolation by column chromatography (*n*-hexane/EtOAc 15:1) yielded **3ac** (58.0 mg, 86%, *Z/E* = 4.7/1 determined by <sup>1</sup>H NMR spectroscopy) as a yellow oil. **<sup>1</sup>H NMR** (400 MHz, CDCl<sub>3</sub>) δ = 8.73 (d, *J* = 4.8 Hz, 0.35H, *E* isomer), 8.65 (d, *J* = 4.8 Hz, 1.65H, *Z* isomer), 8.39 (d, *J* = 8.4 Hz, 0.82H, *Z* isomer), 8.27 (d, *J* = 8.4 Hz, 0.18H, *E* isomer), 7.69 (d, *J* = 7.8 Hz, 0.18H, *E* isomer), 7.63 (d, *J* = 7.8 Hz, 0.82H, *Z* isomer), 7.39 – 7.21 (m, 3H, *E* and *Z* isomer), 7.08 (t, *J*

= 4.8 Hz, 0.23H, *E* isomer), 7.02 (t,  $J = 4.8$  Hz, 0.77H, *Z* isomer), 6.99 – 6.91 (m, 3H, *E* and *Z* isomer), 6.89 (s, 0.21H, *E* isomer), 6.85 (dd,  $J = 17.2, 10.6$  Hz, 0.18H, *E* isomer), 6.84 (s, 0.18H, *E* isomer), 6.70 (dd,  $J = 17.2, 10.6$  Hz, 0.82H, *Z* isomer), 6.70 (s, 0.82H, *Z* isomer), 6.59 (s, 0.79H, *Z* isomer), 5.06 (d,  $J = 17.2$  Hz, 0.13H, *E* isomer), 5.04 (d,  $J = 10.6$  Hz, 0.87H, *Z* isomer), 5.01 (d,  $J = 17.2$  Hz, 0.13H, *E* isomer), 4.98 (d,  $J = 17.2$  Hz, 0.87H, *Z* isomer), 2.42 (s, 0.54H, *E* isomer) 2.26 (s, 2.46H, *Z* isomer).  **$^{13}\text{C}$  NMR** (101 MHz,  $\text{CDCl}_3$ ) *Major isomer*:  $\delta = 157.9$  (CH), 157.5 ( $\text{C}_q$ ), 140.8 (CH), 137.1 ( $\text{C}_q$ ), 136.6 ( $\text{C}_q$ ), 135.7 ( $\text{C}_q$ ), 133.9 ( $\text{C}_q$ ), 133.2 ( $\text{C}_q$ ), 133.2 (CH), 129.6 (CH), 129.1 ( $\text{C}_q$ ), 128.9 (CH), 123.3 (CH), 122.0 (CH), 120.8 (CH), 117.0 (CH), 115.1 ( $\text{CH}_2$ ), 114.2 (CH), 108.4 (CH), 21.3 ( $\text{CH}_3$ ). *Minor isomer*:  $\delta = 158.1$  (CH), 158.0 ( $\text{C}_q$ ), 140.7 (CH), 137.3 ( $\text{C}_q$ ), 137.3 ( $\text{C}_q$ ), 134.9 ( $\text{C}_q$ ), 134.5 ( $\text{C}_q$ ), 133.5 ( $\text{C}_q$ ), 131.0 (CH), 129.7 ( $\text{C}_q$ ), 129.2 (CH), 129.0 (CH), 123.6 (CH), 122.0 (CH), 120.6 (CH), 117.4 ( $\text{CH}_2$ ), 117.3 (CH), 113.4 (CH), 109.3 (CH), 21.4 ( $\text{CH}_3$ ). **IR** (ATR): 3043, 1710, 1590, 1421, 1351, 1307, 1179, 985, 899, 744  $\text{cm}^{-1}$ . **MS** (ESI)  $m/z$  (relative intensity): 338 (80)  $[\text{M}+\text{H}]^+$ , 360 (100)  $[\text{M}+\text{Na}]^+$ . **HR-MS** (ESI)  $m/z$  calcd for  $\text{C}_{23}\text{H}_{20}\text{N}_3$   $[\text{M}+\text{H}]^+$  338.1652, found 338.1650.

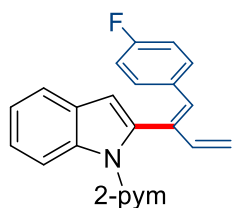

**(*Z*)-2-[1-(4-fluorophenyl)buta-1,3-dien-2-yl]-1-(pyrimidin-2-yl)-1*H*-indole (**3ad**)**

The general procedure **A** was followed using 1-(pyrimidin-2-yl)-1*H*-indole (**1a**) (39.0 mg, 0.20 mmol) and 1-(cyclopropylidene)methyl-4-fluorobenzene (**2d**) (47.4 mg, 0.32 mmol) for 3.5 h. Isolation by column chromatography (*n*-hexane/EtOAc 15:1) yielded **3ad** (51.9 mg, 76%, *Z/E* = 5.1/1 determined by  $^1\text{H}$  NMR spectroscopy) as a yellow oil.  **$^1\text{H}$  NMR** (300 MHz,  $\text{CDCl}_3$ )  $\delta = 8.73$  (d,  $J = 4.8$  Hz, 0.33H, *E* isomer), 8.66 (d,  $J = 4.8$  Hz, 1.67H, *Z* isomer), 8.36 (d,  $J = 8.2, 0.83\text{H}$ , *Z* isomer), 8.30 (d,  $J = 8.2$  Hz, 0.17H, *E* isomer), 7.69 (d,  $J = 7.2$  Hz, 0.17H, *E* isomer), 7.64 (d,  $J = 7.2, 0.83\text{H}$ , *Z* isomer), 7.42 – 6.98 (m, 6H, *E* and *Z* isomer), 6.88 (s, 0.20H, *E* isomer), 6.83 – 6.72 (m, 2H, *E* and *Z* isomer), 6.69 (dd,  $J = 17.0, 10.6$  Hz, 0.83H, *Z* isomer), 6.66 (s, 0.83H, *Z* isomer), 6.58 (s, 0.83H, *Z* isomer), 5.13 (d,  $J = 17.0$  Hz, 0.17H, *E* isomer), 5.08 (d,  $J = 10.6$  Hz, 0.83H, *Z* isomer), 5.06 (d,  $J = 10.6$  Hz, 0.17H, *E* isomer), 5.03 (d,  $J = 17.0$  Hz, 0.83H, *Z* isomer).  **$^{13}\text{C}$  NMR** (101 MHz,  $\text{CDCl}_3$ ) *Major isomer*:  $\delta = 161.9$  (d,  $^1J_{\text{C-F}} = 247.7$  Hz,  $\text{C}_q$ ), 157.9 (CH), 157.4 ( $\text{C}_q$ ), 140.3 (CH), 136.7 ( $\text{C}_q$ ), 135.2 ( $\text{C}_q$ ), 133.85 (d,  $^4J_{\text{C-F}} = 2.0$  Hz,  $\text{C}_q$ ), 132.9 (d,  $^4J_{\text{C-F}} = 3.5$  Hz,  $\text{C}_q$ ), 131.7 (CH), 130.7 (d,  $^3J_{\text{C-F}} = 7.9$  Hz, CH), 129.4 ( $\text{C}_q$ ), 123.5 (CH), 122.1 (CH), 120.8 (CH), 117.1 (CH), 115.8 ( $\text{CH}_2$ ), 115.1 (d,  $^2J_{\text{C-F}} = 21.3$  Hz, CH), 114.2 (CH),

108.7 (CH). *Minor isomer*:  $\delta = 163.0$  (d,  $^1J_{C-F} = 247.7$  Hz, C<sub>q</sub>), 158.1 (CH), 157.6 (C<sub>q</sub>), 140.1 (CH), 137.3 (C<sub>q</sub>), 134.1 (C<sub>q</sub>), 134.1 (d,  $^4J_{C-F} = 2.0$  Hz, C<sub>q</sub>), 133.4 (d,  $^4J_{C-F} = 3.5$  Hz, C<sub>q</sub>), 130.9 (CH), 129.6 (CH), 129.2 (C<sub>q</sub>), 123.8 (CH), 122.1 (CH), 120.7 (CH), 118.0 (CH), 117.3 (CH<sub>2</sub>), 115.4 (CH), 113.5 (CH), 109.5 (CH). **<sup>19</sup>F NMR** (282 MHz, CDCl<sub>3</sub>)  $\delta = (-114.1) - (-114.2)$  (m, *E* and *Z* isomer). **IR** (ATR): 3044, 2245, 1717, 1690, 1565, 1503, 1420, 1347, 1307, 1220, 1153, 985, 906, 805, 729 cm<sup>-1</sup>. **MS** (ESI) *m/z* (relative intensity): 342 (100) [M+H]<sup>+</sup>, 364 (70) [M+Na]<sup>+</sup>. **HR-MS** (ESI) *m/z* calcd for C<sub>22</sub>H<sub>17</sub>N<sub>3</sub>F [M+H]<sup>+</sup> 342.1401, found 342.1397.

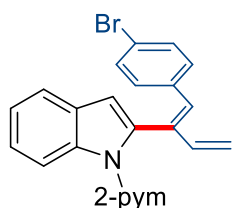

**(Z)-2-[1-(4-Bromophenyl)buta-1,3-dien-2-yl]-1-(pyrimidin-2-yl)-1H-indole (3ae)**

The general procedure **A** was followed using 1-(pyrimidin-2-yl)-1H-indole (**1a**) (39.0 mg, 0.20 mmol) and 1-(cyclopropylidene)methyl-4-bromobenzene (**2e**) (66.9 mg, 0.32 mmol) for 3.0 h. Isolation by column chromatography (*n*-hexane/EtOAc 15:1) yielded **3ae** (48.3 mg, 60%, *Z/E* = 1.8/1 determined by <sup>1</sup>H NMR spectroscopy) as a yellow solid. **M.p.** = 100–102 °C. **<sup>1</sup>H NMR** (300 MHz, CDCl<sub>3</sub>)  $\delta = 8.72$  (d, *J* = 4.8 Hz, 0.71H, *E* isomer), 8.66 (d, *J* = 4.8 Hz, 1.30H, *Z* isomer), 8.36 (d, *J* = 8.2 Hz, 0.64H, *Z* isomer), 8.28 (d, *J* = 8.2 Hz, 0.36H, *E* isomer), 7.67 (d, *J* = 7.7 Hz, 0.36H, *E* isomer), 7.62 (d, *J* = 7.7 Hz, 0.64H, *Z* isomer), 7.52 (d, *J* = 8.2 Hz, 0.64H, *Z* isomer), 7.39 – 7.18 (m, 5H, *E* and *Z* isomer), 7.10 (t, *J* = 4.8 Hz, 0.40H, *E* isomer), 7.05 (t, *J* = 4.8 Hz, 0.60H, *Z* isomer), 6.93 (d, *J* = 8.5 Hz, 0.83H, *Z* isomer), 6.82 (s, 0.36H, *E* isomer), 6.80 (s, 0.36H, *E* isomer), 6.75 (dd, *J* = 17.2, 10.6 Hz, 0.36H, *E* isomer), 6.66 (dd, *J* = 17.2, 10.6 Hz, 0.64H, *Z* isomer), 6.62 (s, 0.64H, *Z* isomer), 6.54 (s, 0.64H, *Z* isomer), 5.08 (d, *J* = 17.2 Hz, 0.35H, *E* isomer), 5.08 (d, *J* = 10.6 Hz, 0.65H, *Z* isomer), 5.03 (d, *J* = 10.6 Hz, 0.35H, *E* isomer), 5.01 (d, *J* = 17.2 Hz, 0.65H, *Z* isomer). **<sup>13</sup>C NMR** (126 MHz, CDCl<sub>3</sub>) *Major isomer*:  $\delta = 158.0$  (CH), 157.4 (C<sub>q</sub>), 140.3 (CH), 140.2 (C<sub>q</sub>), 136.7 (C<sub>q</sub>), 135.7 (C<sub>q</sub>), 134.9 (C<sub>q</sub>), 131.6 (CH), 131.2 (CH), 130.6 (CH), 129.4 (C<sub>q</sub>), 123.6 (CH), 122.1 (CH), 121.1 (CH), 120.8 (C<sub>q</sub>), 117.2 (CH), 116.3 (CH<sub>2</sub>), 114.3 (CH), 108.7 (CH). *Minor isomer*:  $\delta = 158.1$  (CH), 157.9 (C<sub>q</sub>), 137.4 (CH), 136.2 (C<sub>q</sub>), 135.0 (C<sub>q</sub>), 134.5 (C<sub>q</sub>), 131.5 (CH), 131.3 (CH), 129.4 (CH), 129.1 (C<sub>q</sub>), 123.8 (CH), 122.2 (CH), 121.3 (CH), 120.7 (C<sub>q</sub>), 118.4 (CH<sub>2</sub>), 117.4 (CH), 113.5 (CH), 109.6 (CH). One C<sub>q</sub> is missing due to low signal to noise ratio or signal overlap. **IR** (ATR): 3044, 1711, 1561, 1487, 1421, 1346, 1302, 1008, 906, 727 cm<sup>-1</sup>. **MS** (ESI) *m/z* (relative intensity):



342 (75), (<sup>79</sup>Br) [M+H]<sup>+</sup>, 364 (100) (<sup>79</sup>Br) [M+Na]<sup>+</sup>. **HR-MS** (ESI) *m/z* calcd for C<sub>22</sub>H<sub>17</sub>N<sub>3</sub><sup>79</sup>Br [M+H]<sup>+</sup> 402.0606, found 402.0604.

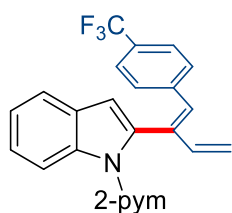

**(Z)-1-(Pyrimidin-2-yl)-2-{1-[4-(trifluoromethyl)phenyl]buta-1,3-dien-2-yl}-1H-indole**

**(3af)**

The general procedure **A** was followed using 1-(pyrimidin-2-yl)-1H-indole (**1a**) (39.0 mg, 0.20 mmol) and 1-(cyclopropylidene)methyl-4-trifluoromethylbenzene (**2f**) (63.4 mg, 0.32 mmol) for 3.0 h. Isolation by column chromatography (*n*-hexane/EtOAc 15:1) yielded **3af** (40.7 mg, 52%, *Z/E* = 3.6/1 determined by <sup>1</sup>H NMR spectroscopy) as a yellow oil. **<sup>1</sup>H NMR** (300 MHz, CDCl<sub>3</sub>)  $\delta$  = 8.74 (d, *J* = 4.8 Hz, 0.43H, *E* isomer), 8.66 (d, *J* = 4.8 Hz, 1.57H, *Z* isomer), 8.42 (d, *J* = 8.2 Hz, 0.79H, *Z* isomer), 8.34 (d, *J* = 8.2 Hz, 0.21H, *E* isomer), 7.74 – 7.53 (m, 2H, *E* and *Z* isomer), 7.42 – 7.26 (m, 4H, *E* and *Z* isomer), 7.20 (d, *J* = 8.2 Hz, 1H, *E* and *Z* isomer), 7.10 (t, *J* = 4.9 Hz, 0.29H, *E* isomer), 7.05 (t, *J* = 4.8 Hz, 0.82H, *Z* isomer), 6.91 (s, 0.18H, *E* isomer), 6.88 (s, 0.19H, *E* isomer), 6.82 (dd, *J* = 17.3, 10.7 Hz, 0.21H, *E* isomer), 6.73 (s, 0.80H, *Z* isomer), 6.71 (dd, *J* = 17.3, 10.7 Hz, 0.88H, *Z* isomer), 6.58 (s, 0.76H, *Z* isomer), 5.17 (d, *J* = 17.3 Hz, 0.18H, *E* isomer), 5.14 (d, *J* = 10.7 Hz, 0.78H, *Z* isomer), 5.09 (d, *J* = 10.7 Hz, 0.22H, *E* isomer), 5.04 (d, *J* = 17.3 Hz, 0.82H, *Z* isomer). **<sup>13</sup>C NMR** (101 MHz, CDCl<sub>3</sub>) *Major isomer*:  $\delta$  = 158.0 (CH), 157.5 (C<sub>q</sub>), 140.4 (q, <sup>3</sup>*J*<sub>C-F</sub> = 1.4 Hz, C<sub>q</sub>), 140.1 (CH), 136.7 (C<sub>q</sub>), 136.4 (C<sub>q</sub>), 134.8 (C<sub>q</sub>), 131.1 (CH), 129.4 (C<sub>q</sub>), 129.2 (CH), 128.7 (q, <sup>2</sup>*J*<sub>C-F</sub> = 32.3 Hz, C<sub>q</sub>), 125.0 (q, *J* = 3.9 Hz, CH), 124.3 (q, <sup>1</sup>*J*<sub>C-F</sub> = 271.9 Hz, C<sub>q</sub>), 123.7 (CH), 122.2 (CH), 120.9 (CH), 117.2 (CH), 117.1 (CH<sub>2</sub>), 114.4 (CH), 109.0 (CH). *Minor isomer*:  $\delta$  = 158.1 (CH), 157.1 (C<sub>q</sub>), 140.8 (q, <sup>3</sup>*J*<sub>C-F</sub> = 1.4 Hz, C<sub>q</sub>), 139.9 (CH), 137.4 (C<sub>q</sub>), 136.2 (C<sub>q</sub>), 134.3 (C<sub>q</sub>), 129.9 (CH), 129.0 (CH), 129.0 (q, <sup>2</sup>*J*<sub>C-F</sub> = 32.3 Hz, C<sub>q</sub>), 128.6 (C<sub>q</sub>), 128.1 (q, <sup>1</sup>*J*<sub>C-F</sub> = 271.9 Hz, C<sub>q</sub>), 125.2 (q, *J* = 3.9 Hz, CH), 124.0 (CH), 123.0 (CH), 120.8 (CH), 119.0 (CH<sub>2</sub>), 117.4 (CH), 113.6 (CH), 109.8 (CH). **<sup>19</sup>F NMR** (377 MHz, CDCl<sub>3</sub>)  $\delta$  = -62.4 (*E* isomer), -62.5 (*Z* isomer). **IR** (ATR): 3048, 1573, 1562, 1453, 1423, 1352, 1322, 1124, 1067, 827 cm<sup>-1</sup>. **MS** (ESI) *m/z* (relative intensity): 392 (90) [M+H]<sup>+</sup>, 414 (100) [M+Na]<sup>+</sup>. **HR-MS** (ESI) *m/z* calcd for C<sub>23</sub>H<sub>17</sub>N<sub>3</sub>F<sub>3</sub> [M+H]<sup>+</sup> 392.1368, found 392.1362.



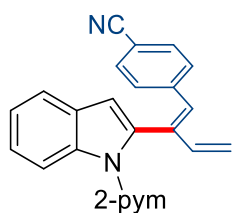

**(Z)-4-{2-[1-(Pyrimidin-2-yl)-1H-indol-2-yl]buta-1,3-dien-1-yl}benzonitrile (3ag)**

The general procedure **A** was followed using 1-(pyrimidin-2-yl)-1*H*-indole (**1a**) (39.0 mg, 0.20 mmol) and 4-(cyclopropylidenemethyl)benzonitrile (**2g**) (49.7 mg, 0.32 mmol) for 3.0 h. Isolation by column chromatography (*n*-hexane/EtOAc 15:1) yielded **3ag** (62.7 mg, 90%, *Z/E* = 1.4/1 determined by <sup>1</sup>H NMR spectroscopy) as a yellow solid. **M.p.** = 140–141 °C. <sup>1</sup>H NMR (400 MHz, CDCl<sub>3</sub>) δ = 8.72 (d, *J* = 4.8 Hz, 0.84H, *E* isomer), 8.65 (d, *J* = 4.8 Hz, 1.16H, *Z* isomer), 8.37 (d, *J* = 8.4 Hz, 0.58H, *Z* isomer), 8.31 (d, *J* = 8.4 Hz, 0.42H, *E* isomer), 7.67 (d, *J* = 8.2 Hz, 1H, *E* and *Z* isomer), 7.61 (d, *J* = 7.6 Hz, 0.58H, *Z* isomer), 7.53 (d, *J* = 8.3 Hz, 0.59H, *Z* isomer), 7.38 – 7.26 (m, 2H, *E* and *Z* isomer), 7.30 – 7.26 (m, 1H, *E* and *Z* isomer), 7.16 – 7.04 (m, 2H, *E* and *Z* isomer), 7.06 (t, *J* = 4.8 Hz, 0.63H, *Z* isomer), 6.85 (s, 0.42H, *E* isomer), 6.84 (s, 0.42H, *E* isomer), 6.75 (dd, *J* = 17.3, 10.8 Hz, 0.42H, *E* isomer), 6.68 (dd, *J* = 17.3, 10.8 Hz, 0.58H, *Z* isomer), 6.67 (s, 0.58H, *Z* isomer), 6.54 (s, 0.58H, *Z* isomer), 5.16 (d, *J* = 17.3 Hz, 0.42H, *E* isomer), 5.15 (d, *J* = 10.8 Hz, 0.58H, *Z* isomer), 5.10 (d, *J* = 10.8 Hz, 0.42H, *E* isomer), 5.08 (d, *J* = 17.3 Hz, 0.58H, *Z* isomer). <sup>13</sup>C NMR (101 MHz, CDCl<sub>3</sub>) *Major isomer*: δ = 158.0 (CH), 157.4 (C<sub>q</sub>), 141.6 (C<sub>q</sub>), 139.8 (CH), 137.4 (C<sub>q</sub>), 136.7 (C<sub>q</sub>), 134.4 (C<sub>q</sub>), 131.8 (CH), 130.2 (CH), 129.5 (CH), 129.3 (C<sub>q</sub>), 123.9 (CH), 122.3 (CH), 120.9 (CH), 119.2 (C<sub>q</sub>), 117.9 (CH<sub>2</sub>), 117.2 (CH), 114.3 (CH), 110.1 (CH), 109.2 (C<sub>q</sub>). *Minor isomer*: δ = 158.1 (CH), 157.8 (C<sub>q</sub>), 141.9 (C<sub>q</sub>), 139.7 (CH), 137.5 (C<sub>q</sub>), 137.1 (C<sub>q</sub>), 134.1 (C<sub>q</sub>), 132.1 (CH), 130.5 (CH), 129.0 (CH), 128.3 (C<sub>q</sub>), 124.1 (CH), 120.8 (CH), 120.8 (CH), 119.7 (CH<sub>2</sub>), 119.1 (C<sub>q</sub>), 117.4 (CH), 113.7 (CH), 110.5 (CH), 110.1 (C<sub>q</sub>). **IR** (ATR): 2221, 2135, 2023, 1701, 1563, 1420, 1346, 1307, 905, 800 cm<sup>-1</sup>. **MS** (ESI) *m/z* (relative intensity): 349 (100) [M+H]<sup>+</sup>, 371 (40) [M+Na]<sup>+</sup>. **HR-MS** (ESI) *m/z* calcd for C<sub>23</sub>H<sub>17</sub>N<sub>4</sub> [M+H]<sup>+</sup> 349.1448, found 349.1446.

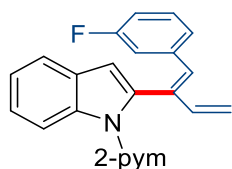

**(Z)-2-[1-(3-Fluorophenyl)buta-1,3-dien-2-yl]-1-(pyrimidin-2-yl)-1H-indole (3ah)**

The general procedure **A** was followed using 1-(pyrimidin-2-yl)-1*H*-indole (**1a**) (39.0 mg, 0.20 mmol) and 1-(cyclopropylidenemethyl)-3-fluorobenzene (**2h**) (47.4 mg, 0.32 mmol) for 3.5 h. Isolation by column chromatography (*n*-hexane/EtOAc 15:1) yielded **3ah** (53.9 mg, 79%, *Z/E*

= 4.4/1 determined by  $^1\text{H}$  NMR spectroscopy) as a yellow oil.  $^1\text{H}$  NMR (300 MHz,  $\text{CDCl}_3$ )  $\delta$  = 8.73 (d,  $J$  = 4.8 Hz, 0.37H, *E* isomer), 8.66 (d,  $J$  = 4.8 Hz, 1.63H, *Z* isomer), 8.36 (d,  $J$  = 8.3, 0.82H, *Z* isomer), 8.30 (d,  $J$  = 8.3 Hz, 0.18H, *E* isomer), 7.69 (d,  $J$  = 7.4 Hz, 0.18H, *E* isomer), 7.64 (d,  $J$  = 7.4 Hz, 0.82H, *Z* isomer), 7.42 – 7.12 (m, 3H, *E* and *Z* isomer), 7.14 – 6.98 (m, 2H, *E* and *Z* isomer), 6.88 – 6.72 (m, 2H, *E* and *Z* isomer), 6.69 (dd,  $J$  = 17.0, 10.6 Hz, 0.83H, *Z* isomer), 6.66 (s, 0.84H, *Z* isomer), 6.58 (s, 0.84H, *Z* isomer), 5.13 (d,  $J$  = 17.0 Hz, 0.17H, *E* isomer), 5.08 (d,  $J$  = 10.6 Hz, 0.82H, *Z* isomer), 5.06 (d,  $J$  = 10.6 Hz, 0.17H, *E* isomer), 5.03 (d,  $J$  = 17.0 Hz, 0.82H, *Z* isomer).  $^{13}\text{C}$  NMR (101 MHz,  $\text{CDCl}_3$ ) *Major isomer*:  $\delta$  = 162.5 (d,  $^1J_{\text{C-F}}$  = 244.5 Hz,  $\text{C}_q$ ), 157.9 (CH), 157.4 ( $\text{C}_q$ ), 140.2 (CH), 139.1 (d,  $^3J_{\text{C-F}}$  = 8.0 Hz,  $\text{C}_q$ ), 136.7 ( $\text{C}_q$ ), 135.4 (CH), 134.8 ( $\text{C}_q$ ), 134.4 ( $\text{C}_q$ ), 131.4 (CH), 129.4 (CH), 129.1 ( $\text{C}_q$ ), 124.8 (d,  $^4J_{\text{C-F}}$  = 2.8 Hz, CH), 123.6 (CH), 122.1 (CH), 120.8 (CH), 117.1 (CH), 116.6 ( $\text{CH}_2$ ), 115.7 (d,  $^2J_{\text{C-F}}$  = 22.0 Hz, CH), 114.3 (CH), 114.0 (d,  $^2J_{\text{C-F}}$  = 21.4 Hz, CH), 109.0 (CH). *Minor isomer*:  $\delta$  = 163.0 (d,  $^1J_{\text{C-F}}$  = 247.7 Hz,  $\text{C}_q$ ), 158.1 (CH), 157.6 ( $\text{C}_q$ ), 140.1 (CH), 139.5 (d,  $^3J_{\text{C-F}}$  = 8.0 Hz,  $\text{C}_q$ ), 137.3 ( $\text{C}_q$ ), 135.3 ( $\text{C}_q$ ), 131.4 (CH), 129.7 ( $\text{C}_q$ ), 129.8 (CH), 129.5 (CH), 129.3 (CH), 129.1 (CH), 125.6 (d,  $^4J_{\text{C-F}}$  = 2.8 Hz, CH), 123.9 (CH), 122.2 (CH), 120.7 (CH), 118.6 (CH), 117.4 ( $\text{CH}_2$ ), 116.3 (d,  $^2J_{\text{C-F}}$  = 22.0 Hz, CH), 109.6 (CH). Two  $\text{C}_q$  are missing due to low signal to noise ratio or signal overlap.  $^{19}\text{F}$  NMR (282 MHz,  $\text{CDCl}_3$ )  $\delta$  = -113.5 (ddd,  $J$  = 9.5, 6.4 Hz, *E* isomer), -113.8 (ddd,  $J$  = 9.5, 6.4 Hz, *Z* isomer). IR (ATR): 3045, 1998, 1718, 1566, 1420, 1347, 1307, 1244, 1143, 905, 803, 729  $\text{cm}^{-1}$ . MS (ESI)  $m/z$  (relative intensity): 342 (100)  $[\text{M}+\text{H}]^+$ , 364 (50)  $[\text{M}+\text{Na}]^+$ . HR-MS (ESI)  $m/z$  calcd for  $\text{C}_{22}\text{H}_{17}\text{N}_3\text{F}$   $[\text{M}+\text{H}]^+$  342.1712, found 342.1400.

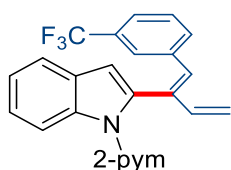

**(Z)-1-(Pyrimidin-2-yl)-2-{1-[3-(trifluoromethyl)phenyl]buta-1,3-dien-2-yl}-1H-indole (3ai)**

The general procedure A was followed using 1-(pyrimidin-2-yl)-1H-indole (**1a**) (39.0 mg, 0.20 mmol) and 1-(cyclopropylidene)methyl-3-trifluoromethylbenzene (**2i**) (63.1 mg, 0.32 mmol) for 3.5 h. Isolation by column chromatography (*n*-hexane/EtOAc 15:1) yielded **3ai** (64.2 mg, 82%, *Z/E* = 5.7/1 determined by  $^1\text{H}$  NMR spectroscopy) as a yellow oil.  $^1\text{H}$  NMR (300 MHz,  $\text{CDCl}_3$ )  $\delta$  = 8.74 (d,  $J$  = 4.8 Hz, 0.30H, *E* isomer), 8.63 (d,  $J$  = 4.8 Hz, 1.70H, *Z* isomer), 8.32 (d,  $J$  = 8.2 Hz, 1H, *E* and *Z* isomer), 7.74 – 7.67 (m, 0.30H, *E* isomer), 7.64 (d,  $J$  = 7.8 Hz, 1H, *E* and *Z* isomer), 7.60 – 7.48 (m, 0.45H, *E* isomer), 7.41 – 7.27 (m, 2.65H, *Z* isomer), 7.41 – 7.27 (m, 3H, *E* and *Z* isomer), 7.16 – 7.12 (m, 1.70H, *Z* isomer), 7.10 (t,  $J$  = 4.8 Hz, 0.21H, *E* isomer), 7.04 (t,  $J$  = 4.8 Hz, 0.79H, *Z* isomer), 6.90 (s, 0.15H, *E* isomer), 6.86 (s, 0.15H, *E*

isomer), 6.79 (dd,  $J = 17.4, 10.4$  Hz, 0.15H, *E* isomer), 6.75 (dd,  $J = 17.4, 10.4$  Hz, 0.85H, *Z* isomer), 6.69 (s, 0.85H, *Z* isomer), 5.18 (d,  $J = 10.4$  Hz, 0.85H, *Z* isomer), 5.15 (d,  $J = 17.4$  Hz, 0.85H, *Z* isomer), 5.14 (d,  $J = 17.4$  Hz, 0.15H, *E* isomer), 5.08 (d,  $J = 10.4$  Hz, 0.15H, *E* isomer).  $^{13}\text{C}$  NMR (101 MHz,  $\text{CDCl}_3$ ) *Major isomer*:  $\delta = 157.9$  (CH), 157.3 ( $\text{C}_q$ ), 139.9 (CH), 137.6 ( $\text{C}_q$ ), 136.7 ( $\text{C}_q$ ), 135.9 ( $\text{C}_q$ ), 134.5 ( $\text{C}_q$ ), 131.7 (CH), 130.9 ( $\text{C}_q$ ), 130.3 (q,  $^2J_{\text{C-F}} = 32.1$  Hz,  $\text{C}_q$ ), 128.5 (CH), 125.9 (CH), 125.9 (q,  $^3J_{\text{C-F}} = 3.8$  Hz, CH), 124.1 (q,  $^1J_{\text{C-F}} = 273.7$  Hz,  $\text{C}_q$ ), 123.7 (CH), 123.6 (q,  $^3J_{\text{C-F}} = 3.8$  Hz, CH), 122.1 (CH), 120.8 (CH), 117.1 (CH), 117.1 ( $\text{CH}_2$ ), 114.2 (CH), 109.1 (CH). *Minor isomer*:  $\delta = 158.1$  (CH), 138.0 (CH), 137.9 ( $\text{C}_q$ ), 134.1 ( $\text{C}_q$ ), 132.9 ( $\text{C}_q$ ), 130.6 ( $\text{C}_q$ ), 129.3 (CH), 129.1 ( $\text{C}_q$ ), 128.8 (CH), 126.3 (q,  $^3J_{\text{C-F}} = 3.8$  Hz, CH), 124.0 (q,  $^1J_{\text{C-F}} = 273.7$  Hz,  $\text{C}_q$ ), 123.9 (CH), 123.9 (q,  $^3J_{\text{C-F}} = 3.8$  Hz, CH), 122.2 (CH), 120.8 (CH), 119.0 (CH), 117.4 ( $\text{CH}_2$ ), 113.6 (CH), 109.8 (CH). Two  $\text{C}_q$  and one CH are missing due to low signal to noise ratio and signal overlap.  $^{19}\text{F}$  NMR (282 MHz,  $\text{CDCl}_3$ )  $\delta = -62.6$  (*E* isomer),  $-62.9$  (*Z* isomer). IR (ATR): 3045, 1720, 1594, 1420, 1347, 1224, 1090, 908, 800, 731  $\text{cm}^{-1}$ . MS (ESI)  $m/z$  (relative intensity): 392 (100)  $[\text{M}+\text{H}]^+$ , 414 (80)  $[\text{M}+\text{Na}]^+$ . HR-MS (ESI)  $m/z$  calcd for  $\text{C}_{23}\text{H}_{17}\text{N}_3\text{F}_3$   $[\text{M}+\text{H}]^+$  392.1369, found 392.1365.

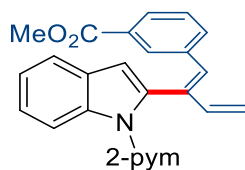

### Methyl (*Z*)-3-{2-[1-(pyrimidin-2-yl)-1*H*-indol-2-yl]buta-1,3-dien-1-yl}benzoate (**3aj**)

The general procedure **A** was followed using 1-(pyrimidin-2-yl)-1*H*-indole (**1a**) (39.0 mg, 0.20 mmol) and methyl-3-(cyclopropylidene)methylbenzoate (**2j**) (59.9 mg, 0.32 mmol) for 3.0 h. Isolation by column chromatography (*n*-hexane/EtOAc 8:1) yielded **3aj** (58.7 mg, 77%, *Z/E* = 4.5/1 determined by  $^1\text{H}$  NMR spectroscopy) as a yellow oil.  $^1\text{H}$  NMR (400 MHz,  $\text{CDCl}_3$ )  $\delta = 8.73$  (d,  $J = 4.8$  Hz, 0.36H, *E* isomer), 8.62 (d,  $J = 4.8$  Hz, 1.64H, *Z* isomer), 8.34 (d,  $J = 8.4$  Hz, 0.82H, *Z* isomer), 8.30 (d,  $J = 8.4$  Hz, 0.18H, *E* isomer), 8.14 (s, 0.18H, *E* isomer), 7.98 (d,  $J = 7.8$  Hz, 0.18H, *E* isomer), 7.75 (d,  $J = 7.6$  Hz, 0.82H, *Z* isomer), 7.68 (d,  $J = 7.7$  Hz, 0.18H, *E* isomer), 7.65 (s, 0.82H, *Z* isomer), 7.64 – 7.57 (m, 0.82H, *Z* isomer), 7.47 (t,  $J = 7.8$  Hz, 0.19H, *E* isomer), 7.37 – 7.31 (m, 1H, *E* and *Z* isomer), 7.30 – 7.24 (m, 1H, *E* and *Z* isomer), 7.18 – 7.16 (m, 0.82H, *Z* isomer), 7.10 – 7.12 (m, 1H, *E* and *Z* isomer), 7.01 (t,  $J = 4.8$  Hz, 0.81H, *Z* isomer), 6.89 (s, 0.18H, *E* isomer), 6.84 (s, 0.18H, *E* isomer), 6.78 (dd,  $J = 17.2, 10.4$  Hz, 0.17H, *E* isomer), 6.73 (dd,  $J = 17.2, 10.4$  Hz, 0.83H, *Z* isomer), 6.71 (s, 0.82H, *Z* isomer), 6.59 (s, 0.82H, *Z* isomer), 5.14 (d,  $J = 10.4$  Hz, 0.82H, *Z* isomer), 5.12 (d,  $J = 17.2$  Hz, 1H, *E* and *Z* isomer), 5.05 (d,  $J = 10.4$  Hz, 0.18H, *E* isomer), 3.96 (s, 0.54H, *E* isomer), 3.75 (s, 2.56H,

*Z* isomer).  $^{13}\text{C}$  NMR (126 MHz,  $\text{CDCl}_3$ ) *Major isomer*:  $\delta = 167.0$  ( $\text{C}_q$ ), 157.9 (CH), 157.3 ( $\text{C}_q$ ), 140.2 (CH), 137.0 ( $\text{C}_q$ ), 136.7 ( $\text{C}_q$ ), 135.2 ( $\text{C}_q$ ), 134.9 ( $\text{C}_q$ ), 133.0 (CH), 131.6 (CH), 130.5 (CH), 129.9 ( $\text{C}_q$ ), 129.4 ( $\text{C}_q$ ), 128.2 (CH), 128.1 (CH), 123.5 (CH), 122.0 (CH), 120.8 (CH), 117.1 (CH), 116.6 ( $\text{CH}_2$ ), 114.3 (CH), 108.9 (CH), 52.1 ( $\text{CH}_3$ ). *Minor isomer*:  $\delta = 167.1$  ( $\text{C}_q$ ), 158.1 (CH), 157.8 ( $\text{C}_q$ ), 140.1 (CH), 137.5 ( $\text{C}_q$ ), 137.3 ( $\text{C}_q$ ), 135.3 ( $\text{C}_q$ ), 134.3 ( $\text{C}_q$ ), 134.0 (CH), 130.8 (CH), 130.3 (CH), 129.6 ( $\text{C}_q$ ), 129.1 ( $\text{C}_q$ ), 128.4 (CH), 128.3 (CH), 123.8 (CH), 122.1 (CH), 120.7 (CH), 118.6 ( $\text{CH}_2$ ), 117.3 (CH), 113.5 (CH), 109.6 (CH), 52.3 ( $\text{CH}_3$ ). **IR** (ATR): 3045, 1720, 1594, 1420, 1347, 1224, 1090, 908, 800, 731  $\text{cm}^{-1}$ . **MS** (ESI)  $m/z$  (relative intensity): 382 (100)  $[\text{M}+\text{H}]^+$ , 414 (80)  $[\text{M}+\text{Na}]^+$ . **HR-MS** (ESI)  $m/z$  calcd for  $\text{C}_{24}\text{H}_{20}\text{N}_3\text{O}_2$   $[\text{M}+\text{H}]^+$  382.1556, found 382.1559.

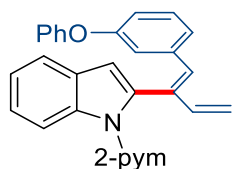

**(Z)-2-[1-(3-Phenoxyphenyl)buta-1,3-dien-2-yl]-1-(pyrimidin-2-yl)-1H-indole (3ak)**

The general procedure **A** was followed using 1-(pyrimidin-2-yl)-1H-indole (**1a**) (39.0 mg, 0.20 mmol) and 1-(cyclopropylidene)methyl-3-phenoxybenzene (**2k**) (70.8 mg, 0.32 mmol) for 3.0 h. Isolation by column chromatography (*n*-hexane/EtOAc 15:1) yielded **3ak** (70.6 mg, 85%, *Z/E* = 6.7/1 determined by  $^1\text{H}$  NMR spectroscopy) as a yellow solid. **M.p.** = 86–88 °C.  $^1\text{H}$  NMR (300 MHz,  $\text{CDCl}_3$ )  $\delta = 8.72$  (d,  $J = 4.8$  Hz, 0.26H, *E* isomer), 8.63 (d,  $J = 4.8$  Hz, 1.74H, *Z* isomer), 8.34 (d,  $J = 8.2$  Hz, 0.87H, *Z* isomer), 8.29 (d,  $J = 8.2$  Hz, 0.13H, *E* isomer), 7.68 (d,  $J = 7.6$  Hz, 0.87H, *Z* isomer), 7.44 – 6.74 (m, 12.4H, *E* and *Z* isomer), 6.66 (s, 0.87H, *Z* isomer), 6.65 (dd,  $J = 17.3, 10.8$  Hz, 0.87H, *Z* isomer), 6.54 (s, 0.87H, *Z* isomer), 5.07 (d,  $J = 17.3$  Hz, 0.13H, *E* isomer), 5.06 (d,  $J = 10.8$  Hz, 0.87H, *Z* isomer), 5.00 (d,  $J = 17.3$  Hz, 0.87H, *Z* isomer), 5.00 (d,  $J = 10.8$  Hz, 0.13H, *E* isomer).  $^{13}\text{C}$  NMR (101 MHz,  $\text{CDCl}_3$ ) *Major isomer*:  $\delta = 157.8$  (CH), 157.4 ( $\text{C}_q$ ), 157.2 ( $\text{C}_q$ ), 156.5 ( $\text{C}_q$ ), 140.2 (CH), 138.6 ( $\text{C}_q$ ), 136.7 ( $\text{C}_q$ ), 135.1 ( $\text{C}_q$ ), 134.9 ( $\text{C}_q$ ), 132.1 (CH), 129.5 (CH), 129.4 ( $\text{C}_q$ ), 129.3 (CH), 123.6 (CH), 123.4 (CH), 123.2 (CH), 122.0 (CH), 120.8 (CH), 119.2 (CH), 118.8 (CH), 117.7 (CH), 117.0 (CH), 116.1 ( $\text{CH}_2$ ), 114.3 (CH), 108.9 (CH). *Minor isomer*:  $\delta = 158.1$  (CH), 157.9 ( $\text{C}_q$ ), 157.1 ( $\text{C}_q$ ), 139.0 ( $\text{C}_q$ ), 137.3 ( $\text{C}_q$ ), 134.8 ( $\text{C}_q$ ), 134.6 ( $\text{C}_q$ ), 130.1 ( $\text{C}_q$ ), 129.9 (CH), 129.6 (CH), 129.1 (CH), 124.7 (CH), 123.7 (CH), 123.5 (CH), 122.1 (CH), 120.7 (CH), 119.8 (CH), 118.1 ( $\text{CH}_2$ ), 117.6 (CH), 117.3 (CH), 113.5 (CH), 109.5 (CH). One  $\text{C}_q$  and two CH are missing due to low signal to noise ratio or signal overlap. **IR** (ATR): 3047, 1692, 1568, 1423, 1244, 1154, 1079, 900, 800, 732

cm<sup>-1</sup>. **MS** (ESI) *m/z* (relative intensity): 416 (70) [M+H]<sup>+</sup>, 438 (100) [M+Na]. **HR-MS** (ESI) *m/z* calcd for C<sub>28</sub>H<sub>22</sub>N<sub>3</sub>O [M+H] 416.1757, found 416.1744.

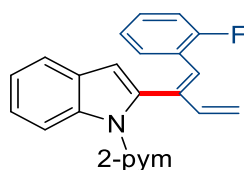

**(Z)-2-(1-(2-Fluorophenyl)buta-1,3-dien-2-yl)-1-(pyrimidin-2-yl)-1H-indole (3al)**

The general procedure A was followed using 1-(pyrimidin-2-yl)-1H-indole (**1a**) (39.0 mg, 0.20 mmol) and 1-(cyclopropylidene)methyl-2-fluorobenzene (**2l**) (47.1 mg, 0.32 mmol) for 3.5 h. Isolation by column chromatography (*n*-hexane/EtOAc 15:1) yielded **3al** (51.2 mg, 75%, *Z/E* = 4.8/1 determined by <sup>1</sup>H NMR spectroscopy) as a yellow oil. **<sup>1</sup>H NMR** (300 MHz, CDCl<sub>3</sub>) δ = 8.74 (d, *J* = 4.8 Hz, 0.35H, *E* isomer), 8.65 (d, *J* = 4.8 Hz, 1.65H, *Z* isomer), 8.32 (dd, *J* = 8.2, 1.2 Hz, 1H, *E* and *Z* isomer), 7.62 (d, *J* = 7.8 Hz, 0.17H, *E* isomer), 7.62 (d, *J* = 7.8 Hz, 0.83H, *Z* isomer), 7.49 (td, *J* = 8.4, 1.5 Hz, 0.17H, *E* isomer), 7.34 (td, *J* = 8.4, 1.5 Hz, 0.84H, *Z* isomer), 7.30 – 7.12 (m, 2H, *E* and *Z* isomer), 7.21 – 7.00 (m, 2H, *E* and *Z* isomer), 7.00 – 6.82 (m, 3H, *E* and *Z* isomer), 6.74 (dd, *J* = 18.0, 9.6 Hz, 0.87H, *Z* isomer), 6.61 (s, 0.83H, *Z* isomer), 5.16 (dd, *J* = 17.4 Hz, 0.13H, *E* isomer), 5.10 (d, *J* = 10.9 Hz, 0.87H, *Z* isomer), 5.12 (d, *J* = 17.4 Hz, 0.87H, *Z* isomer), 5.06 (d, *J* = 10.9 Hz, 0.13H, *E* isomer). **<sup>13</sup>C NMR** (101 MHz, CDCl<sub>3</sub>) *Major isomer*: δ = 160.6 (d, <sup>1</sup>*J*<sub>C-F</sub> = 248.3 Hz, C<sub>q</sub>), 157.9 (CH), 157.4 (CH), 140.2 (C<sub>q</sub>), 136.7 (C<sub>q</sub>), 135.5 (d, *J*<sub>C-F</sub> = 1.6 Hz, C<sub>q</sub>), 135.1 (C<sub>q</sub>), 130.1 (d, <sup>4</sup>*J*<sub>C-F</sub> = 2.8 Hz, CH), 129.4 (C<sub>q</sub>), 128.7 (d, <sup>3</sup>*J*<sub>C-F</sub> = 8.5 Hz, CH), 124.4 (d, <sup>3</sup>*J*<sub>C-F</sub> = 5.1 Hz, C<sub>q</sub>), 123.8 (CH), 123.8 (CH), 123.6 (CH), 122.0 (CH), 120.8 (CH), 117.1 (CH), 116.5 (CH<sub>2</sub>), 114.8 (d, <sup>2</sup>*J*<sub>C-F</sub> = 21.9 Hz, CH), 114.1 (CH), 109.0 (CH). *Minor isomer*: δ = 158.1 (CH), 157.8 (CH), 139.8 (C<sub>q</sub>), 137.3 (C<sub>q</sub>), 135.8 (C<sub>q</sub>), 134.5 (C<sub>q</sub>), 131.3 (d, <sup>4</sup>*J*<sub>C-F</sub> = 2.8 Hz, CH), 129.2 (d, <sup>3</sup>*J*<sub>C-F</sub> = 8.5 Hz, CH), 129.1 (C<sub>q</sub>), 124.6 (d, <sup>3</sup>*J*<sub>C-F</sub> = 5.1 Hz, C<sub>q</sub>), 123.7 (CH), 123.7 (CH), 123.6 (CH), 122.1 (CH), 120.7 (CH), 118.3 (CH<sub>2</sub>), 117.3 (CH), 115.6 (d, <sup>2</sup>*J*<sub>C-F</sub> = 21.9 Hz, CH), 113.6 (CH), 109.5 (CH). One C<sub>q</sub> is missing due to low signal to noise ratio or signal overlap. **<sup>19</sup>F NMR** (282 MHz, CDCl<sub>3</sub>) δ = (-113.9) – (-114.0) (m, *E* isomer), (-116.9) – (-117.0) (m, *Z* isomer). **IR** (ATR): 3044, 1565, 1437, 1421, 1347, 1347, 1071, 906, 803, 727 cm<sup>-1</sup>. **MS** (ESI) *m/z* (relative intensity): 342 (100) [M+H]<sup>+</sup>, 364 (25) [M+Na]<sup>+</sup>. **HR-MS** (ESI) *m/z* calcd for C<sub>22</sub>H<sub>17</sub>N<sub>3</sub>F [M+H]<sup>+</sup> 342.1407, found 342.1401.

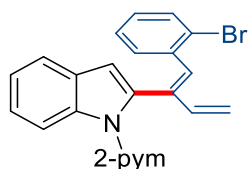

**(Z)-2-[1-(2-Bromophenyl)buta-1,3-dien-2-yl]-1-(pyrimidin-2-yl)-1H-indole (3am)**

The general procedure **A** was followed using 1-(pyrimidin-2-yl)-1H-indole (**1a**) (39.0 mg, 0.20 mmol) and 1-(cyclopropylidene-methyl)-2-bromobenzene (**2m**) (66.6 mg, 0.32 mmol) for 4.0 h. Isolation by column chromatography (*n*-hexane/EtOAc 15:1) yielded **3am** (49.1 mg, 61%, *Z/E* = 1.3/1 determined by <sup>1</sup>H NMR spectroscopy) as a yellow solid. **M.p.** = 143–145 °C. **<sup>1</sup>H NMR** (400 MHz, CDCl<sub>3</sub>)  $\delta$  = 8.75 (d, *J* = 4.8 Hz, 0.86H, *E* isomer), 8.65 (d, *J* = 4.8 Hz, 1.10H, *Z* isomer), 8.31 (d, *J* = 8.4 Hz, 0.50H, *E* isomer), 8.22 (d, *J* = 8.3 Hz, 0.51H, *Z* isomer), 7.68 (d, *J* = 7.7 Hz, 0.50H, *E* isomer), 7.63 (dd, *J* = 8.0, 1.5 Hz, 0.50H, *E* isomer). 7.59 (d, *J* = 7.8 Hz, 0.56H, *Z* isomer), 7.47 (d, *J* = 7.6 Hz, 0.52H, *Z* isomer), 7.40 – 7.30 (m, 2H, *Z* and *E* isomer), 7.26 – 7.13 (m, 1H, *Z* and *E* isomer), 7.13 – 7.08 (m, 0.62H, *E* isomer). 7.05 (t, *J* = 4.8 Hz, 0.70H, *Z* isomer), 7.03 – 6.98 (m, 0.65H, *E* isomer), 6.91 (t, *J* = 7.4, 1H, *Z* and *E* isomer), 6.85 (s, 0.48H, *E* isomer), 6.80 (s, 1.13H, *Z* isomer), 6.76 (d, *J* = 6.7 Hz, 0.30H, *E* isomer), 6.68 (dd, *J* = 17.6, 10.6 Hz, 0.61H, *Z* isomer), 6.59 (s, 0.58H, *E* isomer), 5.22 (d, *J* = 17.3 Hz, 0.54H, *Z* isomer), 5.18 (d, *J* = 10.6 Hz, 0.67H, *Z* isomer), 5.15 (d, *J* = 11.1 Hz, 0.51H, *E* isomer), 5.05 (ddd, *J* = 10.6, 1.7, 1.7 Hz, 0.52H, *E* isomer). **<sup>13</sup>C NMR** (101 MHz, CDCl<sub>3</sub>) *Major isomer*:  $\delta$  = 158.0 (CH), 157.2 (C<sub>q</sub>), 139.8 (CH), 139.4 (C<sub>q</sub>), 137.3 (C<sub>q</sub>), 136.8 (C<sub>q</sub>), 135.3 (C<sub>q</sub>), 132.0 (CH), 131.1 (CH), 130.8 (CH), 129.2 (C<sub>q</sub>), 128.5 (CH), 127.1 (CH), 124.3 (C<sub>q</sub>), 123.6 (CH), 122.0 (CH), 120.8 (CH), 117.2 (CH), 116.9 (CH<sub>2</sub>), 113.9 (CH), 109.6 (CH). *Minor isomer*:  $\delta$  = 158.2 (C<sub>q</sub>), 158.1 (CH), 137.3 (C<sub>q</sub>), 136.7 (C<sub>q</sub>), 135.4 (C<sub>q</sub>), 134.7 (C<sub>q</sub>), 134.3 (CH), 132.8 (CH), 131.7 (CH), 130.7 (CH), 129.2 (C<sub>q</sub>), 128.9 (CH), 127.0 (CH), 124.6 (C<sub>q</sub>), 123.8 (CH), 122.2 (CH), 120.7 (CH), 118.4 (CH<sub>2</sub>), 117.3 (CH), 113.7 (CH), 109.5 (CH). **IR** (ATR): 3049, 1695, 1565, 1423, 1349, 1262, 1213, 1013, 987, 805 cm<sup>-1</sup>. **MS** (ESI) *m/z* (relative intensity): 381 (45), 402 (100) (<sup>79</sup>Br) [M+H]<sup>+</sup>, 424 (70) (<sup>79</sup>Br) [M+Na]<sup>+</sup>. **HR-MS** (ESI) *m/z* calcd for C<sub>22</sub>H<sub>17</sub>N<sub>3</sub><sup>79</sup>Br [M+H]<sup>+</sup> 402.0606, found 402.0594.

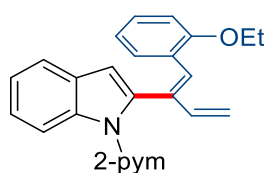

**(Z)-2-[1-(2-Ethoxyphenyl)buta-1,3-dien-2-yl]-1-(pyrimidin-2-yl)-1H-indole (3an)**

The general procedure **A** was followed using 1-(pyrimidin-2-yl)-1*H*-indole (**1a**) (39.0 mg, 0.20 mmol) and 1-(cyclopropylidenemethyl)-2-ethoxybenzene (**2n**) (66.6 mg, 0.32 mmol) for 3.5 h. Isolation by column chromatography (*n*-hexane/EtOAc 15:1) yielded **3an** (57.3 mg, 78%, *Z/E* = 3.0/1 determined by <sup>1</sup>H NMR spectroscopy) as a yellow solid. **M.p.** = 86–89 °C. **<sup>1</sup>H NMR** (300 MHz, CDCl<sub>3</sub>) δ = 8.74 (d, *J* = 4.8 Hz, 0.50H, *E* isomer), 8.64 (d, *J* = 4.8 Hz, 1.51H, *Z* isomer), 8.29 (d, *J* = 8.1 Hz, 1H, *Z* and *E* isomer), 7.69 (d, *J* = 7.5 Hz, 0.28H, *E* isomer), 7.61 (d, *J* = 7.6 Hz, 0.72H, *Z* isomer), 7.47 (d, *J* = 7.5 Hz, 0.28H, *E* isomer), 7.32 (t, *J* = 7.2 Hz, 0.88H, *Z* isomer), 7.25 (t, *J* = 7.6 Hz, 1H, *Z* and *E* isomer), 7.09 – 6.86 (m, 4H, *Z* and *E* isomer), 6.83 (d, *J* = 4.6 Hz, 0.39H, *E* isomer), 6.78 (dd, *J* = 16.4, 11.2 Hz, 0.65H, *Z* isomer), 6.72 (d, *J* = 8.2 Hz, 0.68H, *E* isomer), 6.61 (s, 0.70H, *Z* isomer), 6.58 (t, *J* = 7.5 Hz, 0.75H, *Z* isomer), 5.17 (d, *J* = 16.4 Hz, 0.33H, *E* isomer), 5.10 (d, *J* = 11.2 Hz, 0.77H, *Z* isomer), 5.06 (d, *J* = 16.4 Hz, 0.77H, *Z* isomer), 5.07 (d, *J* = 11.2 Hz, 0.33H, *E* isomer), 4.09 (q, *J* = 7.0 Hz, 0.61H, *E* isomer), 3.99 (q, *J* = 7.2 Hz, 1.39H, *Z* isomer), 1.46 (t, *J* = 7.2 Hz, 2.11H, *Z* isomer), 1.41 (t, *J* = 7.0 Hz, 0.91H, *E* isomer). **<sup>13</sup>C NMR** (75 MHz, CDCl<sub>3</sub>) *Major isomer*: δ = 157.8 (CH), 157.4 (C<sub>q</sub>), 156.7 (C<sub>q</sub>), 140.8 (CH), 136.7 (C<sub>q</sub>), 135.9 (C<sub>q</sub>), 133.2 (C<sub>q</sub>), 129.9 (CH), 129.5 (C<sub>q</sub>), 128.4 (CH), 128.1 (CH), 125.7 (C<sub>q</sub>), 123.2 (CH), 121.8 (CH), 120.7 (CH), 120.3 (CH), 116.8 (CH), 114.9 (CH<sub>2</sub>), 113.9 (CH), 111.0 (CH), 108.7 (CH), 63.7 (CH<sub>2</sub>), 15.1 (CH<sub>3</sub>). *Minor isomer*: δ = 158.0 (CH), 157.1 (C<sub>q</sub>), 140.6 (CH), 137.2 (C<sub>q</sub>), 135.2 (C<sub>q</sub>), 133.3 (C<sub>q</sub>), 131.1 (CH), 129.3 (C<sub>q</sub>), 128.8 (CH), 127.4 (CH), 126.5 (C<sub>q</sub>), 123.5 (CH), 122.0 (CH), 120.6 (CH), 120.1 (CH), 117.3 (CH<sub>2</sub>), 117.1 (CH), 113.4 (CH), 112.0 (CH), 109.1 (CH), 64.2 (CH<sub>2</sub>), 15.0 (CH<sub>3</sub>). One C<sub>q</sub> is missing due to low signal to noise ratio or signal overlap. **IR** (ATR): 2978, 2508, 2162, 2088, 2011, 1957, 1563, 1422, 1239, 1039, 742 cm<sup>-1</sup>. **MS** (ESI) *m/z* (relative intensity): 368 (50) [M+H]<sup>+</sup>, 390 (60) [M+Na]<sup>+</sup>. **HR-MS** (ESI) *m/z* calcd for C<sub>24</sub>H<sub>21</sub>N<sub>3</sub>ONa [M+Na]<sup>+</sup> 390.1577, found 390.1574.

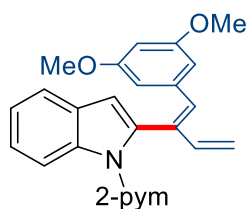

**(Z)-2-[1-(3,5-Dimethoxyphenyl)buta-1,3-dien-2-yl]-1-(pyrimidin-2-yl)-1*H*-indole (**3ao**)**

The general procedure **A** was followed using 1-(pyrimidin-2-yl)-1*H*-indole (**1a**) (39.0 mg, 0.20 mmol) and 1-(cyclopropylidenemethyl)-3,5-dimethoxybenzene (**2o**) (60.6 mg, 0.32 mmol) for 3.5 h. Isolation by column chromatography (*n*-hexane/EtOAc 10:1) yielded **3ao** (69.8 mg, 91%, *Z/E* = 3.8/1 determined by <sup>1</sup>H NMR spectroscopy) as a yellow oil. **<sup>1</sup>H NMR** (300 MHz, CDCl<sub>3</sub>)



$\delta = 8.73$  (d,  $J = 4.8$  Hz, 0.42H, *E* isomer), 8.63 (dd,  $J = 4.8$  Hz, 1.58H, *Z* isomer), 8.33 (d,  $J = 7.8$  Hz, 0.78H, *Z* isomer), 8.28 (d,  $J = 8.5$  Hz, 0.22H, *E* isomer), 7.68 (d,  $J = 7.8$  Hz, 0.22H, *E* isomer), 7.64 (dd,  $J = 7.8$  Hz, 0.78H, *Z* isomer), 7.32 (t,  $J = 7.2$  Hz, 1H, *Z* and *E* isomer), 7.25 (t,  $J = 7.2$  Hz, 1H, *Z* and *E* isomer), 7.09 (t,  $J = 4.8$  Hz, 0.24H, *E* isomer), 7.01 (t,  $J = 4.8$  Hz, 0.76H, *Z* isomer), 6.86 – 6.83 (m, 0.45H, *E* isomer), 6.78 (dd,  $J = 17.2, 10.5$  Hz, 0.80H, *Z* isomer), 6.66 (s, 0.73H, *Z* isomer), 6.64 (d,  $J = 2.3$  Hz, 0.40H, *E* isomer), 6.59 (s, 0.72H, *Z* isomer), 6.46 (t,  $J = 2.3$  Hz, 0.23H, *E* isomer), 6.22 (t,  $J = 2.1$  Hz, 0.83H, *Z* isomer), 6.07 (d,  $J = 2.1$  Hz, 1.31H, *Z* isomer), 5.25 (d,  $J = 17.2$  Hz, 0.77H, *Z* isomer), 5.21 (d,  $J = 10.5$  Hz, 0.78H, *Z* isomer), 5.08 (d,  $J = 17.5$  Hz, 0.23H, *E* isomer), 5.01 (d,  $J = 10.8$  Hz, 0.22H, *E* isomer), 3.84 (s, 1.26H, *E* isomer), 3.38 (s, 4.74H, *Z* isomer).  $^{13}\text{C}$  NMR (75 MHz,  $\text{CDCl}_3$ ) *Major isomer*:  $\delta = 160.2$  ( $\text{C}_q$ ), 157.8 (CH), 157.2 ( $\text{C}_q$ ), 140.4 (CH), 138.3 ( $\text{C}_q$ ), 136.6 ( $\text{C}_q$ ), 135.0 ( $\text{C}_q$ ), 134.5 ( $\text{C}_q$ ), 132.8 (CH), 129.4 ( $\text{C}_q$ ), 123.4 (CH), 122.0 (CH), 120.6 (CH), 117.0 (CH), 116.3 ( $\text{CH}_2$ ), 114.3 (CH), 108.7 (CH), 106.5 (CH), 100.6 (CH), 55.0 ( $\text{CH}_3$ ). *Minor isomer*:  $\delta = 160.6$  ( $\text{C}_q$ ), 158.1 (CH), 140.3 (CH), 139.1 ( $\text{C}_q$ ), 137.3 ( $\text{C}_q$ ), 134.9 ( $\text{C}_q$ ), 134.6 ( $\text{C}_q$ ), 130.7 (CH), 129.1 ( $\text{C}_q$ ), 123.7 (CH), 122.1 (CH), 120.7 (CH), 117.8 (CH), 117.3 ( $\text{CH}_2$ ), 113.4 (CH), 109.4 (CH), 107.8 (CH), 99.7 (CH), 55.5 ( $\text{CH}_3$ ). One  $\text{C}_q$  is missing due to low signal to noise ratio or signal overlap. **IR** (ATR): 3047, 2937, 2835, 1730, 1590, 1423, 1344, 1303, 1263, 1201, 1152, 1061, 985, 904, 805, 735  $\text{cm}^{-1}$ . **MS** (ESI)  $m/z$  (relative intensity): 384 (70)  $[\text{M}+\text{H}]^+$ , 406 (100)  $[\text{M}+\text{Na}]^+$ . **HR-MS** (ESI)  $m/z$  calcd for  $\text{C}_{24}\text{H}_{22}\text{N}_3\text{O}_2$   $[\text{M}+\text{H}]^+$  384.1707, found 384.1705.

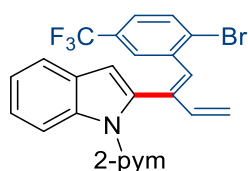

**(Z)-2-{1-[2-Bromo-5-(trifluoromethyl)phenyl]buta-1,3-dien-2-yl}-1-(pyrimidin-2-yl)-1H-indole (3ap)**

The general procedure **A** was followed using 1-(pyrimidin-2-yl)-1*H*-indole (**1a**) (39.0 mg, 0.20 mmol) and 1-(cyclopropylidene)methyl)-2-bromo-5-trifluoromethylbenzene (**2p**) (88.3 mg, 0.32 mmol) for 6.0 h. Isolation by column chromatography (*n*-hexane/EtOAc 15:1) yielded **3ap** (48.0 mg, 51%, *Z/E* = 10.5/1 determined by  $^1\text{H}$  NMR spectroscopy) as a yellow solid. **M.p.** = 71–72 °C.  $^1\text{H}$  NMR (400 MHz,  $\text{CDCl}_3$ )  $\delta = 8.70$  (d,  $J = 4.8$  Hz, 0.17H, *E* isomer), 8.60 (d,  $J = 4.8$  Hz, 1.81H, *Z* isomer), 8.32 (dq,  $J = 8.4, 0.8$  Hz, 0.09H, *Z* isomer), 8.18 (dq,  $J = 8.4, 0.8$  Hz, 0.96H, *Z* isomer), 7.71 (d,  $J = 7.9$  Hz, 0.10H, *E* isomer), 7.69 (d,  $J = 2.4$  Hz, 0.10H, *E* isomer), 7.65 (ddd,  $J = 7.7, 1.4, 0.7$  Hz, 0.10H, *E* isomer), 7.54 (dd,  $J = 7.7, 1.4$  Hz, 0.90H, *Z* isomer), 7.45 (d,  $J = 8.4$  Hz, 0.90H, *Z* isomer), 7.38 (ddt,  $J = 8.4, 2.2, 0.6, 0.0$  Hz, 0.15H, *E* isomer), 7.32



(ddd,  $J = 8.4, 7.1, 1.4$  Hz, 0.17H, *E* isomer), 7.28 – 7.23 (m, 1H, *E* and *Z* isomer), 7.22 – 7.21 (m, 1H, *E* and *Z* isomer), 7.19 (dd,  $J = 7.7, 2.4$  Hz, 1H, *E* and *Z* isomer), 7.11 (dd,  $J = 8.4, 2.3$  Hz, 0.92H, *Z* isomer), 7.07 (t,  $J = 4.8$  Hz, 0.16H, *E* isomer), 7.02 (t,  $J = 4.8$  Hz, 0.84H, *Z* isomer), 6.83 (d,  $J = 0.8$  Hz, 0.08H, *E* isomer), 6.72 (dd,  $J = 17.5, 10.7, 0.8$  Hz, 0.92H, *Z* isomer), 6.71 (s, 0.92H, *Z* isomer), 6.60 (ddd,  $J = 17.4, 10.7, 0.9$  Hz, 0.07H, *E* isomer), 6.60 (s, 0.07H, *E* isomer), 6.56 (d,  $J = 0.8$  Hz, 0.93H, *Z* isomer), 5.27 (dt,  $J = 17.5, 0.8$  Hz, 0.93H, *Z* isomer), 5.21 (dt,  $J = 10.7, 0.8$  Hz, 0.93H, *Z* isomer), 5.20 (dt,  $J = 17.5, 0.8$  Hz, 0.07H, *E* isomer), 5.09 (dt,  $J = 10.7, 0.8$  Hz, 0.07H, *E* isomer).  $^{13}\text{C}$  NMR (101 MHz,  $\text{CDCl}_3$ ) *Major isomer*:  $\delta = 158.0$  (CH), 157.2 ( $\text{C}_q$ ), 139.1 (CH), 137.9 ( $\text{C}_q$ ), 137.3 ( $\text{C}_q$ ), 136.8 ( $\text{C}_q$ ), 133.8 ( $\text{C}_q$ ), 132.4 (CH), 129.5 ( $\text{q}, {}^2J_{\text{C-F}} = 33.5$  Hz,  $\text{C}_q$ ), 129.3 (CH), 129.0 ( $\text{C}_q$ ), 127.9 ( $\text{q}, {}^3J_{\text{C-F}} = 3.9$  Hz, CH), 127.5 ( $\text{C}_q$ ), 124.6 ( $\text{q}, {}^3J_{\text{C-F}} = 3.6$  Hz, CH), 123.9 (CH), 123.5 ( $\text{q}, {}^1J_{\text{C-F}} = 272.5$  Hz,  $\text{C}_q$ ), 122.2 (CH), 120.8 (CH), 118.1 ( $\text{CH}_2$ ), 117.2 (CH), 113.9 (CH), 110.0 (CH). *Minor isomer*:  $\delta = 158.1$  (CH), 157.9 ( $\text{C}_q$ ), 138.9 (CH), 138.2 ( $\text{C}_q$ ), 136.2 ( $\text{C}_q$ ), 133.5 ( $\text{C}_q$ ), 133.4 (CH), 132.4 (CH), 130.0 (CH), 129.0 ( $\text{C}_q$ ), 128.8 ( $\text{C}_q$ ), 124.0 (CH), 122.1 (CH), 120.8 (CH), 119.8 (CH), 119.4 ( $\text{CH}_2$ ), 117.4 (CH), 109.8 (CH). Three  $\text{C}_q$  and one CH are missing due to low signal to noise ratio or signal overlap.  $^{19}\text{F}$  NMR (376 MHz,  $\text{CDCl}_3$ )  $\delta = -62.61$  (*E* isomer),  $-63.32$  (*Z* isomer). IR (ATR): 3048, 2922, 1701, 1566, 1423, 1324, 1263, 1166, 1123, 1079, 1025, 912, 811, 741  $\text{cm}^{-1}$ . MS (ESI)  $m/z$  (relative intensity): 470 (13) ( $^{79}\text{Br}$ )  $[\text{M}+\text{H}]^+$ , 492 (50) ( $^{79}\text{Br}$ )  $[\text{M}+\text{Na}]^+$ . HR-MS (ESI)  $m/z$  calcd for  $\text{C}_{23}\text{H}_{16}^{79}\text{BrF}_3\text{N}_3$   $[\text{M}+\text{H}]^+$  470.0474, found 470.0459.

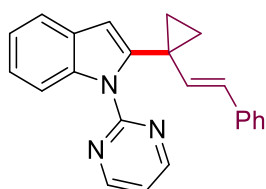

**(*E*)-1-(Pyrimidin-2-yl)-2-(1-styrylcyclopropyl)-1*H*-indole (5aa)**

The general procedure **B** was followed using 1-(pyrimidin-2-yl)-1*H*-indole (39.0 mg, 0.20 mmol) and (2-cyclopropylideneethyl)benzene (**4a**) (46.1 mg, 0.32 mmol) for 3.0 h. Isolation by column chromatography (*n*-hexane/EtOAc 15:1) yielded **5aa** (64.1 mg, 95%) as a colorless oil.  $^1\text{H}$  NMR (300 MHz,  $\text{CDCl}_3$ ):  $\delta = 8.77$  (d,  $J = 4.7$  Hz, 2H), 8.17 (d,  $J = 8.1$  Hz, 1H), 7.66 (d,  $J = 7.2$  Hz, 1H), 7.37 – 7.30 (m, 1H), 7.30 – 7.26 (m, 1H), 7.25 – 7.14 (m, 5H), 7.09 (t,  $J = 4.8$  Hz, 1H), 6.69 (s, 1H), 6.09 (d,  $J = 16.0$  Hz, 1H), 6.00 (d,  $J = 16.0$  Hz, 1H), 1.50 (dd,  $J = 4.6, 4.0$  Hz, 2H), 1.25 (dd,  $J = 4.6, 4.0$  Hz, 2H).  $^{13}\text{C}$  NMR (101 MHz,  $\text{CDCl}_3$ )  $\delta = 158.3$  ( $\text{C}_q$ ), 158.1 (CH), 142.7 ( $\text{C}_q$ ), 137.8 ( $\text{C}_q$ ), 137.2 ( $\text{C}_q$ ), 136.8 (CH), 128.8 ( $\text{C}_q$ ), 128.4 (CH), 127.1 (CH), 126.6 (CH), 125.7 (CH), 123.1 (CH), 121.7 (CH), 120.3 (CH), 117.6 (CH), 113.4 (CH), 107.4 (CH),

22.7 (C<sub>q</sub>), 18.4 (CH<sub>2</sub>). **IR** (ATR): 3026, 1643, 1562, 1452, 1417, 1351, 1298, 1151, 955, 740 cm<sup>-1</sup>. **MS** (ESI) *m/z* (relative intensity): 338 (85) [M+H]<sup>+</sup>, 360 (100) [M+Na]<sup>+</sup>. **HR-MS** (ESI) *m/z* calcd for C<sub>23</sub>H<sub>20</sub>N<sub>3</sub> [M+H]<sup>+</sup> 338.1652, found 338.1652.

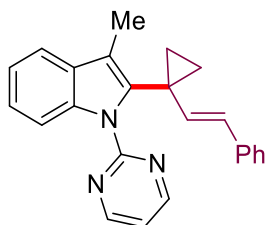

**(E)-3-Methyl-1-(pyrimidin-2-yl)-2-(1-styrylcyclopropyl)-1H-indole (5ba)**

The general procedure **B** was followed using 3-methyl-1-(pyrimidin-2-yl)-1H-indole (41.6 mg, 0.20 mmol) and (2-cyclopropylideneethyl)benzene (**4a**) (46.1 mg, 0.32 mmol) for 3.5 h. Isolation by column chromatography (*n*-hexane/EtOAc 15:1) yielded **5ba** (51.3 mg, 73%) as a colorless oil. **<sup>1</sup>H NMR** (400 MHz, CDCl<sub>3</sub>)  $\delta$  = 8.80 (d, *J* = 4.8 Hz, 2H), 8.23 (d, *J* = 7.8 Hz, 1H), 7.65 (d, *J* = 1.7 Hz, 1H), 7.40 – 7.30 (m, 6H), 7.24 – 7.19 (m, 1H), 7.13 (td, *J* = 4.8, 1.6 Hz, 1H), 6.37 (d, *J* = 15.8 Hz, 1H), 6.30 (d, *J* = 15.8 Hz, 1H), 2.44 (s, 3H), 1.18 (s, 2H), 1.04 (s, 2H). **<sup>13</sup>C NMR** (101 MHz, CDCl<sub>3</sub>)  $\delta$  = 158.1 (C<sub>q</sub>), 158.0 (CH), 138.2 (C<sub>q</sub>), 137.2 (C<sub>q</sub>), 136.5 (CH), 135.8 (C<sub>q</sub>), 130.1 (C<sub>q</sub>), 128.5 (CH), 127.2 (CH), 126.5 (CH), 125.9 (CH), 123.3 (CH), 121.5 (CH), 118.3 (CH), 117.0 (CH), 116.4 (C<sub>q</sub>), 113.3 (CH), 21.3 (C<sub>q</sub>), 18.1 (CH<sub>2</sub>), 9.5 (CH<sub>3</sub>). **IR** (ATR): 3029, 2916, 1645, 1563, 1453, 1420, 1347, 1298, 1178, 956, 736 cm<sup>-1</sup>. **MS** (ESI) *m/z* (relative intensity): 352 (100) [M+H]<sup>+</sup>, 374 (80) [M+Na]<sup>+</sup>. **HR-MS** (ESI) *m/z* calcd for C<sub>24</sub>H<sub>22</sub>N<sub>3</sub> [M+H]<sup>+</sup>, 352.1808, found 352.1808.

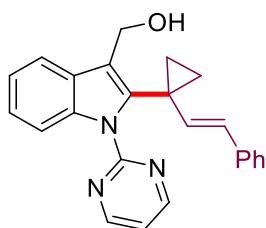

**(E)-(1-(Pyrimidin-2-yl)-2-(1-styrylcyclopropyl)-1H-indol-3-yl)methanol (5ca)**

The general procedure **B** was followed using (1-(pyrimidin-2-yl)-1H-indol-3-yl)methanol (44.8 mg, 0.20 mmol) and (2-cyclopropylideneethyl)benzene (**4a**) (46.1 mg, 0.32 mmol) for 4.5 h. Isolation by column chromatography (*n*-hexane/EtOAc 5:1) yielded **5ca** (33.1 mg, 45%) as a colorless solid. **M.p.** = 145–146 °C. **<sup>1</sup>H NMR** (400 MHz, CDCl<sub>3</sub>)  $\delta$  = 8.81 (d, *J* = 4.6 Hz, 2H), 8.11 (d, *J* = 8.0 Hz, 1H), 7.80 (d, *J* = 7.4 Hz, 1H), 7.36 – 7.26 (m, 6H), 7.21 – 7.17 (m, 2H), 6.31 (s, 2H), 5.06 (d, *J* = 5.0 Hz, 2H), 1.56 (t, *J* = 5.0 Hz, 1H), 1.23 – 1.15 (m, 2H), 1.15 – 1.06

(m, 2H).  $^{13}\text{C}$  NMR (101 MHz,  $\text{CDCl}_3$ )  $\delta$  = 158.3 (CH), 158.0 ( $\text{C}_q$ ), 139.4 ( $\text{C}_q$ ), 137.8 ( $\text{C}_q$ ), 137.0 (CH), 136.1 ( $\text{C}_q$ ), 128.6 (CH), 128.3 ( $\text{C}_q$ ), 127.7 (CH), 126.8 (CH), 126.0 (CH), 123.8 (CH), 122.0 (CH), 119.2 ( $\text{C}_q$ ), 118.8 (CH), 117.8 (CH), 113.3 (CH), 56.4 ( $\text{CH}_2$ ), 21.0 ( $\text{C}_q$ ), 17.8 ( $\text{CH}_2$ ). IR (ATR): 3492, 3023, 2858, 1562, 1455, 1423, 1358, 1298, 1100, 953, 746  $\text{cm}^{-1}$ . MS (ESI)  $m/z$  (relative intensity): 368 (20)  $[\text{M}+\text{H}]^+$ , 381 (40)  $[\text{M}+\text{Na}]^+$ . HR-MS (ESI)  $m/z$  calcd for  $\text{C}_{24}\text{H}_{22}\text{N}_3\text{O}$   $[\text{M}+\text{H}]^+$  368.1755, found 368.1757.

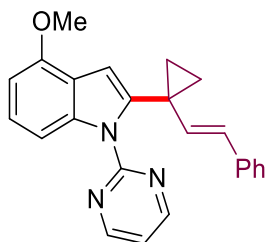

**(E)-4-Methoxy-1-(pyrimidin-2-yl)-2-(1-styrylcyclopropyl)-1H-indole (5da)**

The general procedure **B** was followed using 4-methoxy-1-(pyrimidin-2-yl)-1H-indole (44.8 mg, 0.20 mmol) and (2-cyclopropylideneethyl)benzene (**4a**) (46.1 mg, 0.32 mmol) for 3.0 h. Isolation by column chromatography (*n*-hexane/EtOAc 15:1) yielded **5da** (55.1 mg, 75%) as a colorless solid. **M.p.** = 115–116 °C.  $^1\text{H}$  NMR (300 MHz,  $\text{CDCl}_3$ )  $\delta$  = 8.76 (d,  $J$  = 4.8 Hz, 2H), 7.75 (d,  $J$  = 8.4 Hz, 1H), 7.26 – 7.18 (m, 3H), 7.17 – 7.12 (m, 3H), 7.08 (t,  $J$  = 4.8 Hz, 1H), 6.82 (s, 1H), 6.70 (d,  $J$  = 7.9 Hz, 1H), 6.08 (d,  $J$  = 16.0 Hz, 1H), 5.97 (d,  $J$  = 16.0 Hz, 1H), 4.03 (s, 3H), 1.53 – 1.48 (m, 2H), 1.25 – 1.20 (m, 2H).  $^{13}\text{C}$  NMR (75 MHz,  $\text{CDCl}_3$ )  $\delta$  = 158.3 ( $\text{C}_q$ ), 158.1 (CH), 152.7 ( $\text{C}_q$ ), 141.2 ( $\text{C}_q$ ), 138.5 ( $\text{C}_q$ ), 137.8 ( $\text{C}_q$ ), 136.8 (CH), 128.3 (CH), 127.1 (CH), 126.5 (CH), 125.7 (CH), 123.9 (CH), 119.1 ( $\text{C}_q$ ), 117.7 (CH), 106.7 (CH), 104.2 (CH), 101.8 (CH), 55.5 ( $\text{CH}_3$ ), 22.6 ( $\text{C}_q$ ), 18.3 ( $\text{CH}_2$ ). IR (ATR): 3000, 2201, 1564, 1437, 1419, 1360, 1256, 1075, 812, 769  $\text{cm}^{-1}$ . MS (ESI)  $m/z$  (relative intensity): 368 (100)  $[\text{M}+\text{H}]^+$ , 390 (80)  $[\text{M}+\text{Na}]^+$ . HR-MS (ESI)  $m/z$  calcd for  $\text{C}_{24}\text{H}_{22}\text{N}_3\text{O}$   $[\text{M}+\text{H}]^+$  368.1755, found 368.1757.

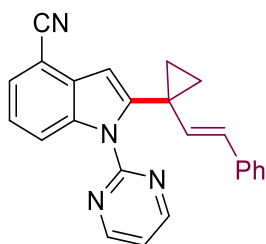

**(E)-1-(Pyrimidin-2-yl)-2-(1-styrylcyclopropyl)-1H-indole-4-carbonitrile (5ea)**

The general procedure **B** was followed using 1-(pyrimidin-2-yl)-1H-indole-4-carbonitrile (43.8 mg, 0.20 mmol) and (2-cyclopropylideneethyl)benzene (**4a**) (46.1 mg, 0.32 mmol) for 4.0 h. Isolation by column chromatography (*n*-hexane/EtOAc 4:1) yielded **5ea** (39.9 mg, 55%) as a white solid. **M.p.** = 153–155 °C. <sup>1</sup>H NMR (400 MHz, CDCl<sub>3</sub>) δ = 8.80 (d, *J* = 4.8 Hz, 2H), 8.28 (d, *J* = 8.2 Hz, 1H), 7.57 (dd, *J* = 7.4, 1.1 Hz, 1H), 7.31 (td, *J* = 8.1, 7.5, 1.4 Hz, 1H), 7.25 – 7.15 (m, 3H), 7.15 – 7.09 (m, 3H), 6.88 (s, 1H), 6.01 (d, *J* = 16.0 Hz, 1H), 5.95 (d, *J* = 16.0 Hz, 1H), 1.53 – 1.49 (m, 2H), 1.29 – 1.25 (m, 2H). <sup>13</sup>C NMR (101 MHz, CDCl<sub>3</sub>) δ = 158.4 (CH), 157.7 (C<sub>q</sub>), 145.9 (C<sub>q</sub>), 137.4 (C<sub>q</sub>), 137.0 (C<sub>q</sub>), 135.6 (CH), 130.5 (C<sub>q</sub>), 128.4 (CH), 127.7 (CH), 126.8 (CH), 126.5 (CH), 125.8 (CH), 122.8 (CH), 118.7 (C<sub>q</sub>), 118.5 (CH), 118.0 (CH), 105.4 (CH), 102.7 (C<sub>q</sub>), 22.6 (C<sub>q</sub>), 18.4 (CH<sub>2</sub>). **IR** (ATR): 3037, 2213, 1646, 1561, 1411, 1361, 1302, 1202, 928, 814, 775, 742 cm<sup>-1</sup>. **MS** (ESI) *m/z* (relative intensity): 363 (55) [M+H]<sup>+</sup>, 385 (100) [M+Na]<sup>+</sup>. **HR-MS** (ESI) *m/z* calcd for C<sub>24</sub>H<sub>19</sub>N<sub>4</sub> [M+H]<sup>+</sup> 363.1604, found 363.1603.

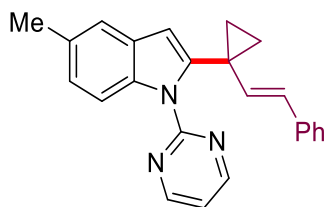

**(E)-5-Methyl-1-(pyrimidin-2-yl)-2-(1-styrylcyclopropyl)-1H-indole (5fa)**

The general procedure **B** was followed using 4-methoxy-1-(pyrimidin-2-yl)-1H-indole (41.6 mg, 0.20 mmol) and (2-cyclopropylideneethyl)benzene (**4a**) (46.1 mg, 0.32 mmol) for 3.0 h. Isolation by column chromatography (*n*-hexane/EtOAc 15:1) yielded **5fa** (56.9 mg, 81%) as a yellow oil. <sup>1</sup>H NMR (400 MHz, CDCl<sub>3</sub>) δ = 8.72 (d, *J* = 4.8 Hz, 2H), 8.07 (d, *J* = 8.5 Hz, 1H), 7.41 (s, 2H), 7.22 – 7.09 (m, 6H), 7.03 (t, *J* = 4.8 Hz, 1H), 6.59 (s, 1H), 6.04 (d, *J* = 16.0 Hz, 1H), 5.98 (d, *J* = 16.0 Hz, 1H), 2.49 (s, 3H), 1.48 – 1.36 (m, 2H), 1.23 – 1.19 (m, 2H). <sup>13</sup>C NMR (101 MHz, CDCl<sub>3</sub>) δ = 158.3 (C<sub>q</sub>), 158.0 (CH), 142.7 (C<sub>q</sub>), 137.9 (C<sub>q</sub>), 137.0 (CH), 135.5 (C<sub>q</sub>), 131.1 (C<sub>q</sub>), 129.1 (C<sub>q</sub>), 128.4 (CH), 127.0 (CH), 126.5 (CH), 125.7 (CH), 124.6 (CH), 120.1 (CH), 117.3 (CH), 113.4 (CH), 107.3 (CH), 22.9 (C<sub>q</sub>), 21.5 (CH<sub>3</sub>), 18.4 (CH<sub>2</sub>). **IR** (ATR): 3023, 1644, 1564, 1418, 1336, 1215, 1151, 952, 907, 802, 731, 688 cm<sup>-1</sup>. **MS** (ESI)

$m/z$  (relative intensity): 352 (100)  $[M+H]^+$ , 374 (95)  $[M+Na]^+$ . **HR-MS** (ESI)  $m/z$  calcd for  $C_{24}H_{22}N_3$   $[M+H]^+$  352.1814, found 352.1808.

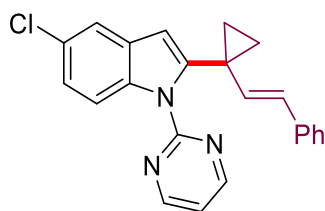

**(E)-5-Chloro-1-(pyrimidin-2-yl)-2-(1-styrylcyclopropyl)-1H-indole (5ga)**

The general procedure **B** was followed using 5-chloro-1-(pyrimidin-2-yl)-1H-indole (45.7 mg, 0.20 mmol) and (2-cyclopropylideneethyl)benzene (**4a**) (46.1 mg, 0.32 mmol) for 3.0 h. Isolation by column chromatography (*n*-hexane/EtOAc 15:1) yielded **5ga** (54.3 mg, 73%) as a colorless oil. **<sup>1</sup>H NMR** (400 MHz,  $CDCl_3$ )  $\delta$  = 8.76 (d,  $J$  = 4.8 Hz, 2H), 8.07 (d,  $J$  = 8.9 Hz, 1H), 7.58 (d,  $J$  = 2.1 Hz, 1H), 7.25 – 7.18 (m, 3H), 7.14 – 7.10 (m, 4H), 6.60 (s, 1H), 6.02 (d,  $J$  = 16.0 Hz, 1H), 5.96 (d,  $J$  = 16.0 Hz, 1H), 1.47 – 1.44 (m, 2H), 1.24 – 1.21 (m, 2H). **<sup>13</sup>C NMR** (101 MHz,  $CDCl_3$ )  $\delta$  = 158.2 (CH), 158.0 ( $C_q$ ), 144.1 ( $C_q$ ), 137.7 ( $C_q$ ), 136.4 (CH), 135.6 ( $C_q$ ), 130.0 ( $C_q$ ), 130.0 ( $C_q$ ), 128.4 (CH), 127.2 (CH), 126.7 (CH), 125.8 (CH), 123.2 (CH), 119.7 (CH), 117.9 (CH), 114.7 (CH), 106.8 (CH), 22.8 ( $C_q$ ), 18.4 ( $CH_2$ ). **IR** (ATR): 3025, 1644, 1564, 1416, 1335, 1186, 1067, 950, 866, 800, 742, 687  $cm^{-1}$ . **MS** (ESI)  $m/z$  (relative intensity): 372 (100) ( $^{35}Cl$ )  $[M+H]^+$ , 394 (50) ( $^{35}Cl$ )  $[M+Na]^+$ . **HR-MS** (ESI)  $m/z$  calcd for  $C_{23}H_{19}N_3^{35}Cl$   $[M+H]^+$  372.1268, found 372.1262

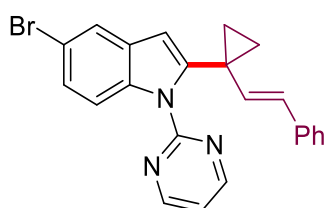

**(E)-5-Bromo-1-(pyrimidin-2-yl)-2-(1-styrylcyclopropyl)-1H-indole (5ha)**

The general procedure **B** was followed using 5-bromo-1-(pyrimidin-2-yl)-1H-indole (54.6 mg, 0.20 mmol) and (2-cyclopropylideneethyl)benzene (**4a**) (46.1 mg, 0.32 mmol) for 3.0 h. Isolation by column chromatography (*n*-hexane/EtOAc 15:1) yielded **5ha** (69.1 mg, 83%) as a yellow solid. **M.p.** = 153–155 °C. **<sup>1</sup>H NMR** (300 MHz,  $CDCl_3$ )  $\delta$  = 8.76 (d,  $J$  = 4.8 Hz, 2H), 8.03 (d,  $J$  = 8.8 Hz, 1H), 7.75 (d,  $J$  = 2.0 Hz, 1H), 7.38 (dd,  $J$  = 8.9, 2.0 Hz, 1H), 7.25 – 7.18 (m, 2H), 7.16 – 7.09 (m, 4H), 6.60 (s, 1H), 6.03 (d,  $J$  = 16.2 Hz, 1H), 5.97 (d,  $J$  = 16.2 Hz, 1H), 1.49 – 1.44 (m, 2H), 1.26 – 1.21 (m, 2H). **<sup>13</sup>C NMR** (101 MHz,  $CDCl_3$ )  $\delta$  = 158.2 ( $C_q$ ), 158.0 (CH), 144.0 ( $C_q$ ), 137.6 ( $C_q$ ), 136.4 (CH), 135.9 ( $C_q$ ), 130.5 ( $C_q$ ), 128.4 (CH), 127.2 (CH), 126.7

(CH), 125.8 (CH), 125.7 (CH), 122.8 (CH), 117.9 (CH), 115.1 (CH), 114.9 (C<sub>q</sub>), 106.7 (CH), 22.7 (C<sub>q</sub>), 18.4 (CH<sub>2</sub>). **IR** (ATR): 3022, 1644, 1563, 1415, 1334, 1185, 949, 907, 866, 799, 740, 688 cm<sup>-1</sup>. **MS** (ESI) *m/z* (relative intensity): 381 (60), 416 (100) (<sup>79</sup>Br) [M+H]<sup>+</sup>, 438 (60) (<sup>79</sup>Br) [M+Na]<sup>+</sup>. **HR-MS** (ESI) *m/z* calcd for C<sub>23</sub>H<sub>19</sub>N<sub>3</sub><sup>79</sup>Br [M+H]<sup>+</sup> 416.0762, found 416.0757.

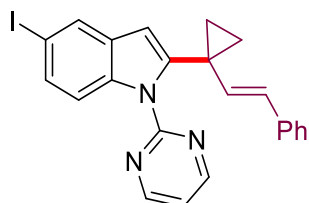

**(E)-5-Iodo-1-(pyrimidin-2-yl)-2-(1-styrylcyclopropyl)-1H-indole (5ia)**

The general procedure **B** was followed using 5-iodo-1-(pyrimidin-2-yl)-1H-indole (64.0 mg, 0.20 mmol) and (2-cyclopropylideneethyl)benzene (**4a**) (46.1 mg, 0.32 mmol) for 4.0 h. Isolation by column chromatography (*n*-hexane/EtOAc 15:1) yielded **5ia** (50.0 mg, 54%) as a yellow oil. **<sup>1</sup>H NMR** (400 MHz, CDCl<sub>3</sub>)  $\delta$  = 8.75 (d, *J* = 4.8 Hz, 2H), 7.95 (s, 1H), 7.91 (d, *J* = 8.8 Hz, 1H), 7.54 (d, *J* = 8.8 Hz, 1H), 7.24 – 7.17 (m, 2H), 7.15 – 7.08 (m, 4H), 6.57 (s, 1H), 6.00 (d, *J* = 16.2 Hz, 1H), 5.95 (d, *J* = 16.0 Hz, 1H), 1.49 – 1.42 (m, 2H), 1.24 – 1.19 (m, 2H). **<sup>13</sup>C NMR** (101 MHz, CDCl<sub>3</sub>)  $\delta$  = 158.2 (CH), 143.6 (C<sub>q</sub>), 137.6 (C<sub>q</sub>), 136.5 (C<sub>q</sub>), 136.4 (C<sub>q</sub>), 131.4 (CH), 131.3 (C<sub>q</sub>), 129.1 (CH), 128.4 (CH), 127.2 (CH), 126.7 (CH), 125.8 (CH), 117.9 (CH), 115.6 (CH), 106.4 (CH), 85.4 (C<sub>q</sub>), 22.6 (C<sub>q</sub>), 18.4 (CH<sub>2</sub>). **IR** (ATR): 3025, 2921, 2849, 1732, 1643, 1563, 1415, 1330, 1183, 1023, 947, 799, 738, 689 cm<sup>-1</sup>. **MS** (ESI) *m/z* (relative intensity): 338 (40), 464 (100) [M+H]<sup>+</sup>, 486 (60) [M+Na]<sup>+</sup>. **HR-MS** (ESI) *m/z* calcd for C<sub>23</sub>H<sub>19</sub>N<sub>3</sub>I [M+H]<sup>+</sup> 464.0624, found 464.0618.

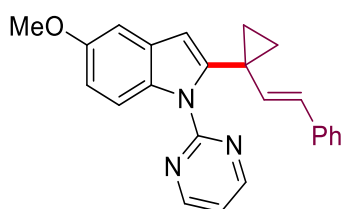

**(E)-5-Methoxy-1-(pyrimidin-2-yl)-2-(1-styrylcyclopropyl)-1H-indole (5ja)**

The general procedure **B** was followed using 5-methoxy-1-(pyrimidin-2-yl)-1H-indole (44.8 mg, 0.20 mmol) and (2-cyclopropylideneethyl)benzene (**4a**) (46.1 mg, 0.32 mmol) for 3.0 h. Isolation by column chromatography (*n*-hexane/EtOAc 15:1) yielded **5ja** (61.7 mg, 84%) as a colorless oil. **<sup>1</sup>H NMR** (400 MHz, CDCl<sub>3</sub>)  $\delta$  = 8.74 (d, *J* = 4.8 Hz, 2H), 8.16 (d, *J* = 9.0 Hz, 1H), 7.25 – 7.20 (m, 2H), 7.18 – 7.14 (m, 3H), 7.12 (d, *J* = 2.5 Hz, 1H), 7.05 (t, *J* = 4.8 Hz, 1H), 6.98 (dd, *J* = 9.0, 2.6 Hz, 1H), 6.63 (s, 1H), 6.09 (d, *J* = 16.0 Hz, 1H), 6.03 (d, *J* = 16.0 Hz, 1H),

3.93 (s, 3H), 1.49 – 1.46 (m, 2H), 1.26 – 1.23 (m, 2H).  $^{13}\text{C}$  NMR (101 MHz,  $\text{CDCl}_3$ )  $\delta$  = 158.2 ( $\text{C}_q$ ), 158.0 (CH), 155.4 ( $\text{C}_q$ ), 143.2 ( $\text{C}_q$ ), 137.8 ( $\text{C}_q$ ), 137.0 (CH), 132.1 ( $\text{C}_q$ ), 129.5 ( $\text{C}_q$ ), 128.4 (CH), 126.9 (CH), 126.5 (CH), 125.7 (CH), 117.2 (CH), 114.7 (CH), 112.4 (CH), 107.6 (CH), 102.5 (CH), 55.9 ( $\text{CH}_3$ ), 23.0 ( $\text{C}_q$ ), 18.4 ( $\text{CH}_2$ ). IR (ATR): 3002, 1614, 1564, 1418, 1341, 1214, 1154, 1030, 951, 801, 737, 688  $\text{cm}^{-1}$ . MS (ESI)  $m/z$  (relative intensity) 368 (100)  $[\text{M}+\text{H}]^+$ , 390 (25)  $[\text{M}+\text{Na}]^+$ . HR-MS (ESI)  $m/z$  calcd for  $\text{C}_{24}\text{H}_{22}\text{N}_3\text{O}$   $[\text{M}+\text{H}]^+$  368.1757 found 368.1759.

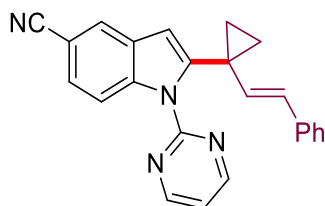

**(E)-1-(Pyrimidin-2-yl)-2-(1-styrylcyclopropyl)-1H-indole-5-carbonitrile (5ka)**

The general procedure **B** was followed using 1-(pyrimidin-2-yl)-1H-indole-5-carbonitrile (43.8 mg, 0.20 mmol) and (2-cyclopropylideneethyl)benzene (**4a**) (46.1 mg, 0.32 mmol) for 3.0 h. Isolation by column chromatography (*n*-hexane/EtOAc 5:1) yielded **5ka** (60.2 mg, 83%) as a colorless oil.  $^1\text{H}$  NMR (400 MHz,  $\text{CDCl}_3$ )  $\delta$  = 8.80 (d,  $J$  = 4.9 Hz, 2H), 8.09 (d,  $J$  = 8.7 Hz, 1H), 7.95 (s, 1H), 7.51 (dd,  $J$  = 8.6, 1.5 Hz, 1H), 7.23 – 7.16 (m, 3H), 7.18 – 7.07 (m, 3H), 6.69 (s, 1H), 5.99 (d,  $J$  = 16.0 Hz, 1H), 5.92 (d,  $J$  = 16.0 Hz, 1H), 1.49 – 1.46 (m, 2H), 1.26 – 1.23 (m, 2H).  $^{13}\text{C}$  NMR (101 MHz,  $\text{CDCl}_3$ )  $\delta$  = 158.4 (CH), 157.6 ( $\text{C}_q$ ), 145.3 ( $\text{C}_q$ ), 138.9 ( $\text{C}_q$ ), 137.3 ( $\text{C}_q$ ), 135.6 (CH), 128.5 ( $\text{C}_q$ ), 128.4 (CH), 127.6 (CH), 126.8 (CH), 126.0 (CH), 125.7 (CH), 125.4 (CH), 120.6 ( $\text{C}_q$ ), 118.6 (CH), 114.0 (CH), 106.8 (CH), 104.7 ( $\text{C}_q$ ), 22.4 ( $\text{C}_q$ ), 18.3 ( $\text{CH}_2$ ). IR (ATR): 3025, 2221, 1733, 1564, 1463, 1418, 1375, 1309, 1239, 1040, 952, 808, 743, 690  $\text{cm}^{-1}$ . MS (ESI)  $m/z$  (relative intensity): 363 (65)  $[\text{M}+\text{H}]^+$ , 385 (100)  $[\text{M}+\text{Na}]^+$ . HR-MS (ESI)  $m/z$  calcd for  $\text{C}_{24}\text{H}_{19}\text{N}_4$   $[\text{M}+\text{H}]^+$  363.1604, found 363.1603.

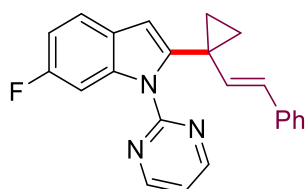

**(E)-6-Fluoro-1-(pyrimidin-2-yl)-2-(1-styrylcyclopropyl)-1H-indole (5la)**

The general procedure **B** was followed using 6-fluoro-1-(pyrimidin-2-yl)-1H-indole (42.4 mg, 0.20 mmol) and (2-cyclopropylideneethyl)benzene (**4a**) (46.1 mg, 0.32 mmol) for 3.0 h. Isolation by column chromatography (*n*-hexane/EtOAc 15:1) yielded **5la** (64.0 mg, 90%) as a yellow oil.  $^1\text{H}$  NMR (300 MHz,  $\text{CDCl}_3$ )  $\delta$  = 8.76 (d,  $J$  = 4.8 Hz, 2H), 7.96 (dd,  $J$  = 10.9, 2.4 Hz,

1H), 7.54 (dd,  $J = 8.6, 5.5$  Hz, 1H), 7.26 – 7.19 (m, 2H), 7.15 – 7.13 (m, 3H), 7.03 (td,  $J = 8.9, 2.3$  Hz, 1H), 6.65 (d,  $J = 0.8$  Hz, 1H), 6.07 (d,  $J = 16.0$  Hz, 1H), 6.00 (d,  $J = 16.0$  Hz, 1H), 1.51 – 1.46 (m, 2H), 1.28 – 1.22 (m, 2H).  $^{13}\text{C}$  NMR (75 MHz,  $\text{CDCl}_3$ )  $\delta = 160.6$  (d,  $^1J_{\text{C-F}} = 237.4$  Hz,  $\text{C}_q$ ), 158.1 (CH), 158.1 ( $\text{C}_q$ ), 143.2 (d,  $^4J_{\text{C-F}} = 3.9$  Hz,  $\text{C}_q$ ), 137.7 ( $\text{C}_q$ ), 137.3 (d,  $^3J_{\text{C-F}} = 12.6$  Hz,  $\text{C}_q$ ), 136.7 (CH), 128.4 (CH), 127.1 (CH), 126.6 (CH), 125.7 (CH), 125.1 (d,  $^5J_{\text{C-F}} = 1.4$  Hz,  $\text{C}_q$ ), 120.8 (d,  $^3J_{\text{C-F}} = 10.0$  Hz, CH), 117.7 (CH), 110.1 (d,  $^2J_{\text{C-F}} = 24.2$  Hz, CH), 107.3 (CH), 100.8 (d,  $^2J_{\text{C-F}} = 28.3$  Hz, CH), 22.8 ( $\text{C}_q$ ), 18.4 ( $\text{CH}_2$ ).  $^{19}\text{F}$  NMR (282 MHz,  $\text{CDCl}_3$ )  $\delta = -119.5$  (td,  $J = 10.1, 5.5$  Hz). IR (ATR): 3025, 1734, 1565, 1417, 1357, 1261, 1192, 1150, 936, 813, 739, 689  $\text{cm}^{-1}$ . MS (ESI)  $m/z$  (relative intensity): 356 (100)  $[\text{M}+\text{H}]^+$ , 378 (90)  $[\text{M}+\text{Na}]^+$ . HR-MS (ESI)  $m/z$  calcd for  $\text{C}_{23}\text{H}_{19}\text{N}_3\text{F}$   $[\text{M}+\text{H}]^+$  356.1563, found 356.1558.

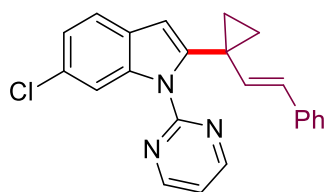

#### (E)-6-Chloro-1-(pyrimidin-2-yl)-2-(1-styrylcyclopropyl)-1H-indole (5ma)

The general procedure **B** was followed using 6-chloro-1-(pyrimidin-2-yl)-1H-indole (45.7 mg, 0.20 mmol) and (2-cyclopropylideneethyl)benzene (**4a**) (46.1 mg, 0.32 mmol) for 3.0 h. Isolation by column chromatography (*n*-hexane/EtOAc 15:1) yielded **5ma** (58.8 mg, 79%) as a colorless oil.  $^1\text{H}$  NMR (300 MHz,  $\text{CDCl}_3$ )  $\delta = 8.77$  (d,  $J = 4.8$  Hz, 2H), 8.19 (d,  $J = 1.9$  Hz, 1H), 7.52 (d,  $J = 8.3$  Hz, 1H), 7.25 – 7.18 (m, 3H), 7.16 – 7.10 (m, 4H), 6.63 (s, 2H), 6.04 (d,  $J = 16.0$  Hz, 1H), 5.96 (d,  $J = 16.0$  Hz, 1H), 1.50 – 1.45 (m, 2H), 1.26 – 1.21 (m, 2H).  $^{13}\text{C}$  NMR (101 MHz,  $\text{CDCl}_3$ )  $\delta = 158.2$  (CH), 157.9 ( $\text{C}_q$ ), 143.5 ( $\text{C}_q$ ), 137.6 ( $\text{C}_q$ ), 137.5 ( $\text{C}_q$ ), 136.5 (CH), 129.0 ( $\text{C}_q$ ), 128.4 (CH), 127.3 ( $\text{C}_q$ ), 127.2 (CH), 126.7 (CH), 125.7 (CH), 122.3 (CH), 121.0 (CH), 117.9 (CH), 113.7 (CH), 107.2 (CH), 22.7 ( $\text{C}_q$ ), 18.4 ( $\text{CH}_2$ ). IR (ATR): 3025, 2221, 1562, 1417, 1350, 1298, 958, 911, 811, 739, 688  $\text{cm}^{-1}$ . MS (ESI)  $m/z$  (relative intensity): 372 (100) ( $^{35}\text{Cl}$ )  $[\text{M}+\text{H}]^+$ , 394 (30) ( $^{35}\text{Cl}$ )  $[\text{M}+\text{Na}]^+$ . HR-MS (ESI)  $m/z$  calcd for  $\text{C}_{23}\text{H}_{19}\text{N}_3^{35}\text{Cl}$   $[\text{M}+\text{H}]^+$  372.1262, found 372.1264.

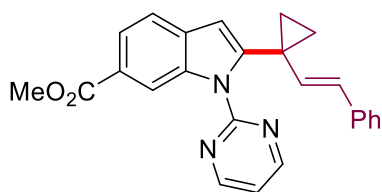

#### Methyl (E)-1-(pyrimidin-2-yl)-2-(1-styrylcyclopropyl)-1H-indole-6-carboxylate (5na)



The general procedure **A** was followed using 1-(pyrimidin-2-yl)-1*H*-indole-6-carboxylate (50.5 mg, 0.20 mmol) and (2-cyclopropylideneethyl)benzene (**4a**) (46.1 mg, 0.32 mmol) for 3.0 h. Isolation by column chromatography (*n*-hexane/EtOAc 5:1) yielded **5na** (62.5 mg, 79%) as a colorless oil. <sup>1</sup>H NMR (300 MHz, CDCl<sub>3</sub>) δ = 8.80 (d, *J* = 4.8 Hz, 2H), 8.78 (s, 1H), 7.96 (dd, *J* = 8.3, 1.5 Hz, 1H), 7.65 (dd, *J* = 8.3, 0.6 Hz, 1H), 7.24 – 7.17 (m, 2H), 7.16 – 7.10 (m, 4H), 6.70 (s, 1H), 6.04 (d, *J* = 16.2 Hz, 1H), 5.95 (d, *J* = 16.2 Hz, 1H), 3.96 (s, 3H), 1.52 – 1.46 (m, 2H), 1.27 – 1.22 (m, 2H). <sup>13</sup>C NMR (101 MHz, CDCl<sub>3</sub>) δ = 168.2 (C<sub>q</sub>), 158.4 (CH), 157.8 (C<sub>q</sub>), 146.0 (C<sub>q</sub>), 137.5 (C<sub>q</sub>), 136.6 (C<sub>q</sub>), 135.9 (CH), 132.5 (C<sub>q</sub>), 128.4 (CH), 127.4 (CH), 126.7 (CH), 125.7 (CH), 124.7 (C<sub>q</sub>), 122.8 (CH), 119.9 (CH), 118.2 (CH), 115.3 (CH), 107.0 (CH), 52.0 (CH<sub>3</sub>), 22.6 (C<sub>q</sub>), 18.3 (CH<sub>2</sub>). IR (ATR): 3023, 2949, 1708, 1563, 1418, 1360, 1279, 1221, 1127, 1093, 956, 910, 811, 735, 688 cm<sup>-1</sup>. MS (ESI) *m/z* (relative intensity): 396 (100) [M+H]<sup>+</sup>, 418 (100) [M+Na]<sup>+</sup>. HR-MS (ESI) *m/z* calcd for C<sub>25</sub>H<sub>22</sub>N<sub>3</sub>O<sub>3</sub> [M+H]<sup>+</sup> 396.1712, found 396.1707.

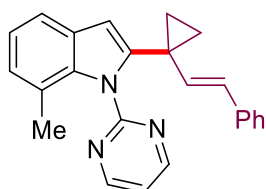

**(E)-7-Methyl-1-(pyrimidin-2-yl)-2-(1-styrylcyclopropyl)-1*H*-indole (**5oa**)**

The general procedure **B** was followed using 7-methyl-1-(pyrimidin-2-yl)-1*H*-indole (41.6 mg, 0.20 mmol) and (2-cyclopropylideneethyl)benzene (**4a**) (46.1 mg, 0.32 mmol) for 3.0 h. Isolation by column chromatography (*n*-hexane/EtOAc 15:1) yielded **5oa** (52.7 mg, 75%) as a colorless oil. <sup>1</sup>H NMR (300 MHz, CDCl<sub>3</sub>) δ = 8.78 (d, *J* = 4.9 Hz, 2H), 7.54 (d, *J* = 7.4 Hz, 1H), 7.28 – 7.20 (m, 2H), 7.20 – 7.12 (m, 5H), 7.04 (d, *J* = 7.2 Hz, 1H), 6.63 (s, 1H), 6.01 (d, *J* = 16.0 Hz, 1H), 5.83 (d, *J* = 16.0 Hz, 1H), 2.00 (s, 3H), 1.45 – 1.39 (m, 2H), 1.08 – 1.01 (m, 2H). <sup>13</sup>C NMR (101 MHz, CDCl<sub>3</sub>) δ = 159.5 (C<sub>q</sub>), 157.9 (CH), 143.2 (C<sub>q</sub>), 137.4 (C<sub>q</sub>), 136.9 (C<sub>q</sub>), 134.9 (CH), 128.9 (C<sub>q</sub>), 128.3 (CH), 127.7 (CH), 126.6 (CH), 125.8 (CH), 125.4 (CH), 121.7 (C<sub>q</sub>), 121.2 (CH), 119.4 (CH), 118.4 (CH), 105.3 (CH), 21.5 (C<sub>q</sub>), 19.7 (CH<sub>3</sub>), 16.8 (CH<sub>2</sub>). IR (ATR): 3029, 1644, 1593, 1560, 1415, 1355, 1229, 955, 807, 739, 689 cm<sup>-1</sup>. MS (ESI) *m/z* (relative intensity): 352 (100) [M+H]<sup>+</sup>, 374 (95) [M+Na]<sup>+</sup>. HR-MS (ESI) *m/z* calcd for C<sub>24</sub>H<sub>22</sub>N<sub>3</sub> [M+H]<sup>+</sup> 352.1808, found 352.1809.

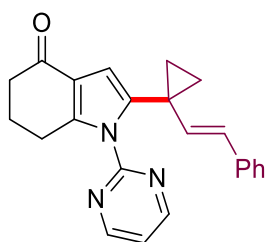

**(E)-1-(Pyrimidin-2-yl)-2-(1-styrylcyclopropyl)-1,5,6,7-tetrahydro-4H-indol-4-one (5pa)**

The general procedure **B** was followed using 1-(Pyrimidin-2-yl)-1,5,6,7-tetrahydro-4H-indol-4-one (42.5 mg, 0.20 mmol) and (2-cyclopropylideneethyl)benzene (**4a**) (46.1 mg, 0.32 mmol) for 3.0 h. Isolation by column chromatography (*n*-hexane/EtOAc 2:1) yielded **5pa** (54.0 mg, 76%) as a white solid. **M.p.** = 157–159 °C. **<sup>1</sup>H NMR** (400 MHz, CDCl<sub>3</sub>)  $\delta$  = 8.75 (d, *J* = 4.8 Hz, 2H), 7.22 – 7.17 (m, 3H), 7.14 – 7.08 (m, 3H), 6.58 (s, 1H), 5.95 (d, *J* = 15.9 Hz, 1H), 5.75 (d, *J* = 15.9 Hz, 1H), 2.92 (t, *J* = 6.2 Hz, 2H), 2.55 (dd, *J* = 7.2, 5.6 Hz, 2H), 2.19 – 2.13 (m, 2H), 1.32 (dd, *J* = 3.5, 4.5 Hz, 2H), 1.03 (dd, *J* = 3.5, 4.5 Hz, 2H). **<sup>13</sup>C NMR** (101 MHz, CDCl<sub>3</sub>)  $\delta$  = 194.9 (C<sub>q</sub>), 158.4 (CH), 157.3 (C<sub>q</sub>), 145.5 (C<sub>q</sub>), 137.8 (C<sub>q</sub>), 137.5 (C<sub>q</sub>), 135.7 (CH), 128.4 (CH), 127.4 (CH), 126.7 (CH), 125.7 (CH), 121.0 (C<sub>q</sub>), 119.5 (CH), 106.9 (CH), 38.0 (CH<sub>2</sub>), 23.9 (CH<sub>2</sub>), 23.8 (CH<sub>2</sub>), 21.2 (C<sub>q</sub>), 17.5 (CH<sub>2</sub>). **IR** (ATR): 2942, 1649, 1566, 1415, 1303, 1226, 974, 940, 805, 750, 692 cm<sup>-1</sup>. **MS** (ESI) *m/z* (relative intensity): 733 (100), 356 (60) [M+H]<sup>+</sup>, 378 (60) [M+Na]<sup>+</sup>. **HR-MS** (ESI) *m/z* calcd for C<sub>23</sub>H<sub>22</sub>N<sub>3</sub>O [M+H]<sup>+</sup> 356.1763, found 356.1768.

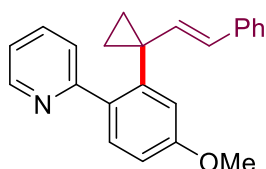

**(E)-2-[4-Methoxy-2-(1-styrylcyclopropyl)phenyl]pyridine (5qa)**

The general procedure **B** was followed using 2-(4-methoxyphenyl)pyridine (36.8 mg, 0.20 mmol) and (2-cyclopropylideneethyl)benzene (**4a**) (46.1 mg, 0.32 mmol) for 5.0 h. Isolation by column chromatography (*n*-hexane/EtOAc 10:1) yielded **5qa** (26.8 mg, 41%) as a colorless solid. **M.p.** = 103–106 °C. **<sup>1</sup>H NMR** (300 MHz, CDCl<sub>3</sub>)  $\delta$  = 8.71 (dd, *J* = 5.0, 1.9 Hz, 1H), 7.64 (td, *J* = 7.7, 1.9 Hz, 1H), 7.39 (t, *J* = 8.0 Hz, 1H), 7.34 (d, *J* = 7.9 Hz, 1H), 7.29 – 7.17 (m, 6H), 7.14 (dd, *J* = 7.8, 1.0 Hz, 1H), 6.96 (dd, *J* = 8.3, 1.0 Hz, 1H), 5.95 (d, *J* = 15.9 Hz, 1H), 5.86 (d, *J* = 15.9 Hz, 1H), 3.77 (s, 3H), 1.02 – 0.97 (m, 2H), 0.76 – 0.70 (m, 2H). **<sup>13</sup>C NMR** (75 MHz, CDCl<sub>3</sub>)  $\delta$  = 157.3 (C<sub>q</sub>), 156.8 (C<sub>q</sub>), 148.7 (CH), 142.0 (C<sub>q</sub>), 139.2 (CH), 137.7 (C<sub>q</sub>), 135.5 (CH), 131.8 (C<sub>q</sub>), 129.1 (CH), 128.4 (CH), 127.5 (CH), 126.6 (CH), 125.7 (CH), 125.6 (CH), 124.4 (CH), 121.7 (CH), 109.8 (CH), 55.9 (CH<sub>3</sub>), 27.7 (C<sub>q</sub>), 16.3 (CH<sub>2</sub>). **IR** (ATR): 3004, 2937, 2837, 1640, 1574, 1459, 1426, 1352, 1254, 1056, 961, 784, 736, 694

cm<sup>-1</sup>. **MS** (ESI) *m/z* (relative intensity): 328 (100) [M+H]<sup>+</sup>, 350 (30) [M+Na]<sup>+</sup>. **HR-MS** (ESI) *m/z* calcd for C<sub>23</sub>H<sub>22</sub>NO [M+H]<sup>+</sup> 328.1701, found 328.1698.

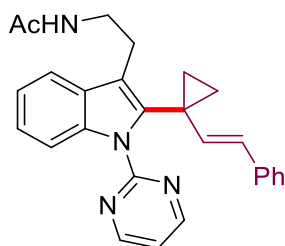

**(E)-N-{2-[1-(pyrimidin-2-yl)-2-(1-styrylcyclopropyl)-1H-indol-3-yl]ethyl}acetamide (**5ra**)**

The general procedure **B** was followed using *N*-(2-(1-(pyrimidin-2-yl)-1H-indol-3-yl)ethyl)acetamide (55.9 mg, 0.20 mmol) and (2-cyclopropylideneethyl)benzene (**4a**) (46.1 mg, 0.32 mmol) for 5.0 h. Isolation by column chromatography (CH<sub>2</sub>Cl<sub>2</sub>/EtOAc 20:1) yielded **5ra** (15.2 mg, 18%) as a colorless solid and **5ra'** (28.9 mg, 34%) as a colorless solid. **5ra**: **M.p.** = 83–84 °C. **<sup>1</sup>H NMR** (300 MHz, CDCl<sub>3</sub>)  $\delta$  = 8.82 (d, *J* = 4.8 Hz, 2H), 8.09 (d, *J* = 8.0 Hz, 1H), 7.68 (d, *J* = 6.9 Hz, 1H), 7.35 – 7.25 (m, 6H), 7.19 (t, *J* = 4.9 Hz, 2H), 6.45 (d, *J* = 15.9 Hz, 1H), 6.33 (d, *J* = 15.9 Hz, 1H), 5.62 (t, *J* = 6.6 Hz, 1H), 3.68 (dt, *J* = 6.6, 6.9 Hz, 2H), 3.15 (t, *J* = 6.9 Hz, 2H), 1.74 (s, 3H), 1.22 – 1.09 (m, 2H), 1.04 – 1.09 (m, 2H). **<sup>13</sup>C NMR** (101 MHz, CDCl<sub>3</sub>)  $\delta$  = 170.3 (C<sub>q</sub>), 158.3 (CH), 158.0 (C<sub>q</sub>), 138.4 (C<sub>q</sub>), 137.7 (C<sub>q</sub>), 137.0 (CH), 136.1 (C<sub>q</sub>), 129.1 (C<sub>q</sub>), 128.7 (CH), 127.7 (CH), 127.0 (CH), 126.0 (CH), 123.6 (CH), 121.8 (CH), 118.9 (CH), 117.7 (CH), 117.0 (C<sub>q</sub>), 113.2 (CH), 39.5 (CH<sub>2</sub>), 25.1 (CH<sub>2</sub>), 23.3 (CH<sub>3</sub>), 21.0 (C<sub>q</sub>), 18.0 (CH<sub>2</sub>). **IR** (ATR): 3293, 3051, 2923, 1648, 1562, 1455, 1424, 1356, 1296, 1204, 963, 744, 696 cm<sup>-1</sup>. **MS** (ESI) *m/z* (relative intensity): 423 (100) [M+H]<sup>+</sup>, 445 (50) [M+Na]<sup>+</sup>. **HR-MS** (ESI) *m/z* calcd for C<sub>27</sub>H<sub>27</sub>N<sub>4</sub>O [M+H]<sup>+</sup> 423.2185, found 423.2179.

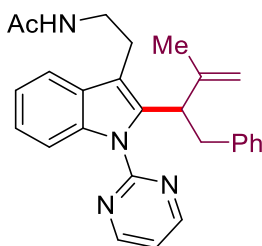

***N*-{2-[2-(3-Methyl-1-phenylbut-3-en-2-yl)-1-(pyrimidin-2-yl)-1*H*-indol-3-yl]ethyl}acetamide (**5ra'**)**

The general procedure **B** was followed using *N*-(2-(1-(pyrimidin-2-yl)-1*H*-indol-3-yl)ethyl)acetamide (55.9 mg, 0.20 mmol) and (2-cyclopropylideneethyl)benzene (**4a**) (46.1 mg, 0.32 mmol) for 5.0 h. Isolation by column chromatography (CH<sub>2</sub>Cl<sub>2</sub>/EtOAc 20:1) yielded **5ra** (15.2 mg, 18%) as a yellow oil and **5ra'** (28.9 mg, 34%) as a yellow solid. **5ra'**: **M.p.** = 74–75 °C. <sup>1</sup>H NMR (300 MHz, CDCl<sub>3</sub>) δ = 8.77 (d, *J* = 4.8 Hz, 2H), 7.79 – 7.73 (m, 1H), 7.61 (dd, *J* = 6.3, 2.8 Hz, 1H), 7.24 – 7.17 (m, 3H), 7.12 – 7.05 (m, 3H), 7.01 – 6.96 (m, 2H), 5.46 (brs, 1H), 4.88 (d, *J* = 8.5 Hz, 2H), 4.57 (t, *J* = 7.7 Hz, 1H), 3.53 – 3.27 (m, 4H), 3.03 – 2.84 (m, 2H), 1.93 (s, 3H), 1.70 (s, 3H). <sup>13</sup>C NMR (101 MHz, CDCl<sub>3</sub>) δ = 169.9 (C<sub>q</sub>), 158.1 (CH), 158.0 (C<sub>q</sub>), 145.8 (C<sub>q</sub>), 140.5 (C<sub>q</sub>), 137.0 (C<sub>q</sub>), 136.5 (C<sub>q</sub>), 129.4 (C<sub>q</sub>), 128.7 (CH), 128.0 (CH), 125.9 (CH), 123.0 (CH), 121.3 (CH), 118.4 (CH), 117.8 (CH), 114.9 (C<sub>q</sub>), 112.5 (CH), 110.7 (CH<sub>2</sub>), 44.6 (CH), 39.5 (CH<sub>2</sub>), 38.7 (CH<sub>2</sub>), 24.4 (CH<sub>2</sub>), 23.4 (CH<sub>3</sub>), 23.1 (CH<sub>3</sub>). **IR** (ATR): 3294, 3055, 2927, 1647, 1561, 1454, 1420, 1365, 1263, 1020, 803, 741, 698 cm<sup>-1</sup>. **MS** (ESI) *m/z* (relative intensity): 425 (65) [M+H]<sup>+</sup>, 447 (100) [M+Na]<sup>+</sup>. **HR-MS** (ESI) *m/z* calcd for C<sub>27</sub>H<sub>29</sub>N<sub>4</sub>O [M+H]<sup>+</sup>425.2336, found 425.2340.

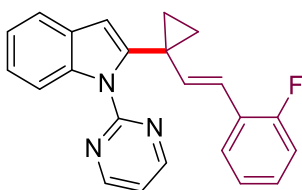

**(*E*)-2-[1-(2-Fluorostyryl)cyclopropyl]-1-(pyrimidin-2-yl)-1*H*-indole (**5ab**)**

The general procedure **B** was followed using 1-(pyrimidin-2-yl)-1*H*-indole (**2a**) (41.6 mg, 0.20 mmol) and 1-(2-cyclopropylideneethyl)-2-fluorobenzene (**4b**) (51.9 mg, 0.32 mmol) for 3.0 h. Isolation by column chromatography (*n*-hexane/EtOAc 15:1) yielded **5ab** (57.6 mg, 81%) as a colorless oil. <sup>1</sup>H NMR (300 MHz, CDCl<sub>3</sub>) δ = 8.77 (d, *J* = 4.8 Hz, 2H), 8.15 (dd, *J* = 8.3, 1.0 Hz, 1H), 7.62 (d, *J* = 7.4 Hz, 1H), 7.33 – 7.15 (m, 3H), 7.13 – 7.05 (m, 2H), 7.01 – 6.89 (m, 2H), 6.67 (s, 1H), 6.16 (s, 2H), 1.49 – 1.43 (m, 2H), 1.27 – 1.22 (m, 2H). <sup>13</sup>C NMR (101 MHz, CDCl<sub>3</sub>) δ = 159.84 (d, <sup>1</sup>*J*<sub>C-F</sub> = 249 Hz, C<sub>q</sub>), 158.3 (C<sub>q</sub>), 158.1 (CH), 142.6 (C<sub>q</sub>), 139.7 (d, <sup>4</sup>*J*<sub>C-F</sub> =

5.5 Hz, CH), 137.2 (C<sub>q</sub>), 128.1 (C<sub>q</sub>), 127.7 (d, <sup>4</sup>J<sub>C-F</sub> = 8.0 Hz, CH), 127.4 (d, <sup>4</sup>J<sub>C-F</sub> = 4.2 Hz, CH), 125.6 (d, <sup>3</sup>J<sub>C-F</sub> = 12 Hz, C<sub>q</sub>), 123.9 (d, <sup>4</sup>J<sub>C-F</sub> = 3.5 Hz, CH), 123.2 (CH), 121.8 (CH), 120.3 (CH), 119.8 (d, <sup>4</sup>J<sub>C-F</sub> = 2.8 Hz, CH), 117.6 (CH), 115.6 (d, <sup>2</sup>J<sub>C-F</sub> = 22 Hz, CH), 113.5 (CH), 107.6 (CH), 23.1 (C<sub>q</sub>), 18.5 (CH<sub>2</sub>). <sup>19</sup>F NMR (377 MHz, CDCl<sub>3</sub>) δ = (-117.8) – (-117.9) (m). IR (ATR): 3044, 1644, 1563, 1418, 1352, 1222, 1192, 958, 803, 743, 676, 629 cm<sup>-1</sup>. MS (ESI) *m/z* (relative intensity): 356.2 (100) [M+H]<sup>+</sup>, 378.2 (90) [M+Na]<sup>+</sup>. HR-MS (ESI) *m/z* calcd for C<sub>23</sub>H<sub>19</sub>N<sub>3</sub>F [M+H]<sup>+</sup> 356.1563, found 356.1559.

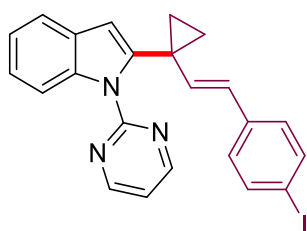

**(E)-2-[1-(4-Iodostyryl)cyclopropyl]-1-(pyrimidin-2-yl)-1H-indole (5ac)**

The general procedure **B** was followed using 1-(pyrimidin-2-yl)-1H-indole (**2a**) (41.6 mg, 0.20 mmol) and 1-(2-cyclopropylideneethyl)-4-iodobenzene (**4c**) (84.4 mg, 0.32 mmol) for 4.0 h. Isolation by column chromatography (*n*-hexane/EtOAc 15:1) yielded a mixture of **5ac** and **5aa** (51.8 mg, 45% yield for **5ac**, 15% yield for **5aa**) as a yellow oil. <sup>1</sup>H NMR (400 MHz, CDCl<sub>3</sub>) δ = 8.75 (d, *J* = 4.7 Hz, 2H), 8.13 (d, *J* = 8.0 Hz, 1H), 7.62 (dd, *J* = 8.0, 1.1 Hz, 1H), 7.51 (d, *J* = 8.4 Hz, 2H), 7.32 – 7.29 (m, 1H), 7.24 (td, *J* = 7.5, 1.1 Hz, 1H), 7.10 (t, *J* = 4.8 Hz, 1H), 6.86 (d, *J* = 8.5 Hz, 2H), 6.66 (s, 0.25H, **5aa**), 6.65 (s, 0.75H, **5ac**), 5.95 (s, 2H), 1.49 – 1.43 (m, 2H), 1.27 – 1.22 (m, 2H). <sup>13</sup>C NMR (101 MHz, CDCl<sub>3</sub>) δ = 158.3 (C<sub>q</sub>), 158.1 (CH), 142.3 (C<sub>q</sub>), 137.9 (CH), 137.41 (CH), 128.8 (C<sub>q</sub>), 128.4 (C<sub>q</sub>), 127.6 (CH), 126.1 (C<sub>q</sub>), 125.8 (CH), 123.2 (CH), 121.8 (CH), 120.4 (CH), 117.6 (CH), 113.5 (CH), 107.6 (CH), 91.4 (C<sub>q</sub>), 22.8 (C<sub>q</sub>), 18.5 (CH<sub>2</sub>). IR (ATR): 3044, 2924, 1710, 1564, 1453, 1424, 1354, 1301, 1218, 1004, 959, 804, 745, 697 cm<sup>-1</sup>. MS (ESI) *m/z* (relative intensity): 381 (100), 464 (60) [M+H]<sup>+</sup>, 486 (45) [M+Na]<sup>+</sup>. HR-MS (ESI) *m/z* calcd for C<sub>23</sub>H<sub>19</sub>N<sub>3</sub>I [M+H]<sup>+</sup> 464.0617, found 464.0618.

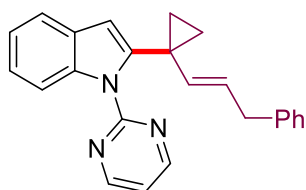

**(E)-2-[1-(3-phenylprop-1-en-1-yl)cyclopropyl]-1-(pyrimidin-2-yl)-1H-indole (5ad)**

The general procedure **B** was followed using 1-(pyrimidin-2-yl)-1H-indole (**2a**) (41.6 mg, 0.20 mmol) and (3-cyclopropylidenepropyl)benzene (**4d**) (50.6 mg, 0.32 mmol) for 3.5 h. Isolation

by column chromatography (*n*-hexane/EtOAc 15:1) yielded **5ad** (52.0 mg, 74%) as a colorless solid. **M.p.** = 81–82 °C. **<sup>1</sup>H NMR** (300 MHz, CDCl<sub>3</sub>)  $\delta$  = 8.69 (d, *J* = 4.8 Hz, 2H), 8.04 (dd, *J* = 8.1, 1.2 Hz, 1H), 7.57 (d, *J* = 6.6 Hz, 1H), 7.26 – 7.13 (m, 5H), 7.05 (t, *J* = 4.8 Hz, 1H), 6.91 (d, *J* = 6.4 Hz, 2H), 6.58 (s, 1H), 5.31 (d, *J* = 15.5 Hz, 1H), 5.22 (dt, *J* = 15.5, 5.9 Hz, 1H), 3.11 (d, *J* = 5.9 Hz, 2H), 1.39 – 1.35 (m, 2H), 1.10 – 1.06 (m, 2H). **<sup>13</sup>C NMR** (101 MHz, CDCl<sub>3</sub>)  $\delta$  = 158.2 (C<sub>q</sub>), 157.9 (CH), 143.2 (C<sub>q</sub>), 140.9 (C<sub>q</sub>), 137.3 (C<sub>q</sub>), 137.2 (CH), 128.7 (C<sub>q</sub>), 128.5 (CH), 128.3 (CH), 126.5 (CH), 125.8 (CH), 123.0 (CH), 121.6 (CH), 120.2 (CH), 117.5 (CH), 113.2 (CH), 106.8 (CH), 38.8 (C<sub>q</sub>), 22.0 (CH<sub>2</sub>), 17.6 (CH<sub>2</sub>). **IR** (ATR): 3026, 1728, 1562, 1418, 1352, 1302, 1198, 1024, 964, 802, 740, 693, 630 cm<sup>-1</sup>. **MS** (ESI) *m/z* (relative intensity): 352 (75) [M+H]<sup>+</sup>, 374 (100) [M+Na]<sup>+</sup>. **HR-MS** (ESI) *m/z* calcd for C<sub>24</sub>H<sub>22</sub>N<sub>3</sub> [M+H]<sup>+</sup> 352.1814, found 352.1823.

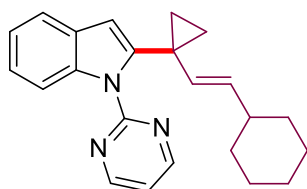

**(E)-2-[1-(2-Cyclohexylvinyl)cyclopropyl]-1-(pyrimidin-2-yl)-1H-indole (5ae)**

The general procedure **B** was followed using 1-(pyrimidin-2-yl)-1H-indole (**2a**) (41.6 mg, 0.20 mmol) and (2-cyclopropylideneethyl)cyclohexane (**4e**) (48.1 mg, 0.32 mmol) for 3.0 h. Isolation by column chromatography (*n*-hexane/EtOAc 15:1) yielded **5ae** (52.9 mg, 77%) as a colorless oil. **<sup>1</sup>H NMR** (400 MHz, CDCl<sub>3</sub>)  $\delta$  = 8.80 (d, *J* = 4.8 Hz, 2H), 8.04 (d, *J* = 8.1 Hz, 1H), 7.60 (d, *J* = 7.7 Hz, 1H), 7.27 (ddd, *J* = 8.4, 7.1, 1.5 Hz, 1H), 7.23 – 7.19 (m, 1H), 7.16 (t, *J* = 4.8 Hz, 1H), 6.56 (s, 1H), 5.07 (d, *J* = 15.6 Hz, 1H), 4.95 (dd, *J* = 15.6, 7.0 Hz, 1H), 1.67 – 1.54 (m, 4H), 1.44 – 1.39 (m, 2H), 1.35 – 1.29 (m, 2H), 1.18 – 1.00 (m, 5H), 0.73 (ddd, *J* = 12.2, 12.2, 3.3 Hz, 2H). **<sup>13</sup>C NMR** (101 MHz, CDCl<sub>3</sub>)  $\delta$  = 158.4 (C<sub>q</sub>), 158.1 (CH), 143.5 (C<sub>q</sub>), 137.4 (C<sub>q</sub>), 134.1 (CH), 133.0 (CH), 128.7 (C<sub>q</sub>), 122.9 (CH), 121.5 (CH), 120.2 (CH), 117.5 (CH), 112.9 (CH), 106.2 (CH), 40.7 (CH), 33.2 (CH<sub>2</sub>), 26.2 (CH<sub>2</sub>), 26.1 (CH<sub>2</sub>), 21.7 (C<sub>q</sub>), 17.7 (CH<sub>2</sub>). **IR** (ATR): 2925, 1561, 1421, 1351, 1324, 1206, 815, 747 cm<sup>-1</sup>. **MS** (ESI) *m/z* (relative intensity): 344 (40) [M+H]<sup>+</sup>, 366 (100) [M+Na]<sup>+</sup>. **HR-MS** (ESI) *m/z* calcd for C<sub>23</sub>H<sub>26</sub>N<sub>3</sub> [M+H]<sup>+</sup> 344.2127, found 344.2129.

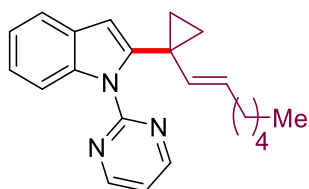

**(E)-2-[1-(Hept-1-en-1-yl)cyclopropyl]-1-(pyrimidin-2-yl)-1H-indole (5af)**

The general procedure **B** was followed using 1-(pyrimidin-2-yl)-1H-indole (**2a**) (41.6 mg, 0.20 mmol) and heptylidene cyclopropane (**4f**) (44.2 mg, 0.32 mmol) for 4.0 h. Isolation by column chromatography (*n*-hexane/CH<sub>2</sub>Cl<sub>2</sub> 8:1) yielded **5ag** (41.8 mg, 63%) as a colorless oil. <sup>1</sup>H NMR (300 MHz, CDCl<sub>3</sub>) δ = 8.80 (d, *J* = 4.8 Hz, 2H), 8.04 (d, *J* = 8.1 Hz, 1H), 7.58 (d, *J* = 7.4 Hz, 1H), 7.26 – 7.14 (m, 3H), 6.56 (s, 1H), 5.14 (d, *J* = 15.5 Hz, 1H), 5.02 (dt, *J* = 15.5, 6.5 Hz, 1H), 1.72 (dt, *J* = 6.5, 6.5 Hz, 2H), 1.39 – 1.34 (m, 2H), 1.23 – 1.16 (m, 2H), 1.10 – 0.95 (m, 6H), 0.83 (t, *J* = 7.2 Hz, 3H). <sup>13</sup>C NMR (101 MHz, CDCl<sub>3</sub>) δ = 158.3 (C<sub>q</sub>), 158.0 (CH), 143.4 (C<sub>q</sub>), 137.2 (C<sub>q</sub>), 135.3 (CH), 128.7 (C<sub>q</sub>), 128.2 (CH), 122.8 (CH), 121.5 (CH), 120.1 (CH), 117.4 (CH), 112.9 (CH), 106.4 (CH), 32.3 (CH<sub>2</sub>), 31.2 (CH<sub>2</sub>), 29.3 (CH<sub>2</sub>), 22.5 (CH<sub>2</sub>), 21.7 (C<sub>q</sub>), 17.4 (CH<sub>2</sub>), 14.0 (CH<sub>3</sub>). IR (ATR): 2923, 2853, 1564, 1454, 1424, 1354, 1301, 1200, 967, 802, 743, 679 cm<sup>-1</sup>. MS (ESI) *m/z* (relative intensity): 332 (100) [M+H]<sup>+</sup>, 354 (90) [M+Na]<sup>+</sup>. HR-MS (ESI) *m/z* calcd for C<sub>22</sub>H<sub>26</sub>N<sub>3</sub> [M+H]<sup>+</sup> 332.2127, found 332.2133.

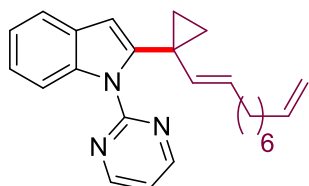

**(E)-2-[1-(Deca-1,9-dien-1-yl)cyclopropyl]-1-(pyrimidin-2-yl)-1H-indole (5ag)**

The general procedure **B** was followed using 1-(pyrimidin-2-yl)-1H-indole (**2a**) (41.6 mg, 0.20 mmol) and dec-9-en-1-ylidene cyclopropane (**4g**) (57.1 mg, 0.32 mmol) for 4.0 h. Isolation by column chromatography (*n*-hexane/CH<sub>2</sub>Cl<sub>2</sub> 8:1) yielded **5ag** (58.7 mg, 79%) as a colorless oil. <sup>1</sup>H NMR (400 MHz, CDCl<sub>3</sub>) δ = 8.80 (d, *J* = 4.7 Hz, 2H), 8.06 (d, *J* = 8.2 Hz, 1H), 7.59 (dd, *J* = 7.7, 1.3 Hz, 1H), 7.30 – 7.25 (m, 1H), 7.20 (td, *J* = 7.4, 1.1 Hz, 1H), 7.15 (t, *J* = 4.8 Hz, 1H), 6.57 (s, 1H), 5.83 (ddt, *J* = 17.0, 10.3, 6.7 Hz, 1H), 5.15 (d, *J* = 15.5 Hz, 1H), 5.09 – 4.94 (m, 3H), 2.03 (dt, *J* = 7.2, 7.2 Hz, 1H), 1.74 (dt, *J* = 7.2, 7.2 Hz, 1H), 1.39 – 1.29 (m, 4H), 1.20 (tt, *J* = 9.9, 6.6 Hz, 2H), 1.13 – 0.99 (m, 6H). <sup>13</sup>C NMR (101 MHz, CDCl<sub>3</sub>) δ = 158.4 (C<sub>q</sub>), 158.1 (CH), 143.5 (C<sub>q</sub>), 139.3 (CH), 137.3 (C<sub>q</sub>), 135.4 (CH), 128.8 (C<sub>q</sub>), 128.2 (CH), 122.9 (CH), 121.6 (CH), 120.2 (CH), 117.5 (CH), 114.3 (CH<sub>2</sub>), 113.1 (CH), 106.5 (CH), 33.9 (CH<sub>2</sub>), 32.4 (CH<sub>2</sub>), 29.7 (CH<sub>2</sub>), 29.0 (CH<sub>2</sub>), 28.9 (CH<sub>2</sub>), 28.9 (CH<sub>2</sub>), 21.8 (C<sub>q</sub>), 17.6 (CH<sub>2</sub>). IR (ATR): 2923,

2851, 1564, 1453, 1421, 1353, 1198, 965, 908, 802, 742, 679  $\text{cm}^{-1}$ . **MS** (ESI)  $m/z$  (relative intensity): 372 (100)  $[\text{M}+\text{H}]^+$ , 394 (18)  $[\text{M}+\text{Na}]^+$ . **HR-MS** (ESI)  $m/z$  calcd for  $\text{C}_{25}\text{H}_{30}\text{N}_3$   $[\text{M}+\text{H}]^+$  372.2434, found 372.2433.

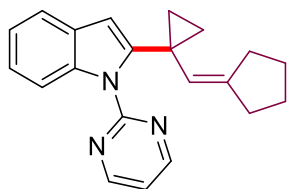

### 2-[1-(Cyclopentylidenemethyl)cyclopropyl]-1-(pyrimidin-2-yl)-1H-indole (**5ah**)

The general procedure **B** was followed using 1-(pyrimidin-2-yl)-1H-indole (**2a**) (41.6 mg, 0.20 mmol) and (cyclopropylidenemethyl)cyclopentane (**4h**) (39.1 mg, 0.32 mmol) for 5.0 h. Isolation by column chromatography (*n*-hexane/ $\text{CH}_2\text{Cl}_2$  8:1) yielded **5ah** (29.0 mg, 46%) as a white solid. **M.p.** = 113–115  $^\circ\text{C}$ .  **$^1\text{H}$  NMR** (300 MHz,  $\text{CDCl}_3$ )  $\delta$  = 8.84 (d,  $J$  = 4.8 Hz, 2H), 7.99 (d,  $J$  = 7.2 Hz, 1H), 7.54 (dd,  $J$  = 7.1, 1.8 Hz, 1H), 7.25 – 7.14 (m, 3H), 6.49 (s, 1H), 5.18 (d,  $J$  = 2.5 Hz, 1H), 2.04 – 1.93 (m, 4H), 1.55 – 1.45 (m, 2H), 1.45 – 1.37 (m, 2H), 1.33 – 1.27 (m, 2H), 1.00 – 0.93 (m, 2H).  **$^{13}\text{C}$  NMR** (101 MHz,  $\text{CDCl}_3$ )  $\delta$  = 158.5 ( $\text{C}_q$ ), 158.2 (CH), 146.7 ( $\text{C}_q$ ), 145.4 ( $\text{C}_q$ ), 137.0 ( $\text{C}_q$ ), 128.9 ( $\text{C}_q$ ), 124.1 (CH), 122.6 (CH), 121.5 (CH), 120.0 (CH), 117.5 (CH), 112.9 (CH), 105.0 (CH), 34.4 ( $\text{CH}_2$ ), 28.6 ( $\text{CH}_2$ ), 26.8 ( $\text{CH}_2$ ), 26.0 ( $\text{CH}_2$ ), 19.9 ( $\text{C}_q$ ), 17.9 ( $\text{CH}_2$ ). **IR** (ATR): 2921, 2855, 1563, 1455, 1422, 1349, 1318, 1283, 1195, 1022, 803, 744, 680  $\text{cm}^{-1}$ . **MS** (ESI)  $m/z$  (relative intensity): 316 (100)  $[\text{M}+\text{H}]^+$ , 338 (30)  $[\text{M}+\text{Na}]^+$ . **HR-MS** (ESI)  $m/z$  calcd for  $\text{C}_{21}\text{H}_{22}\text{N}_3$   $[\text{M}+\text{H}]^+$  316.1814, found 316.1802.

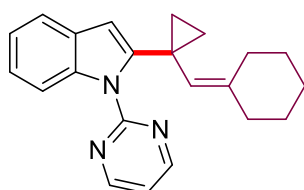

### 2-[1-(Cyclohexylidenemethyl)cyclopropyl]-1-(pyrimidin-2-yl)-1H-indole (**5ai**)

The general procedure **A** was followed using 1-(pyrimidin-2-yl)-1H-indole (**2a**) (41.6 mg, 0.20 mmol) and (cyclopropylidenemethyl)cyclohexane (**4i**) (43.6 mg, 0.32 mmol) for 5.0 h. Isolation by column chromatography (*n*-hexane/ $\text{CH}_2\text{Cl}_2$  8:1) yielded **5ai** (34.3 mg, 52%) as a colorless oil.  **$^1\text{H}$  NMR** (300 MHz,  $\text{CDCl}_3$ )  $\delta$  = 8.85 (d,  $J$  = 4.8 Hz, 2H), 7.98 (d,  $J$  = 7.6 Hz, 1H), 7.59 – 7.49 (m, 1H), 7.25 – 7.13 (m, 3H), 6.49 (d,  $J$  = 0.8 Hz, 1H), 5.08 (s, 1H), 2.23 – 2.10 (m, 2H), 1.83 – 1.72 (m, 2H), 1.37 – 1.25 (m, 8H), 1.02 – 0.92 (m, 2H).  **$^{13}\text{C}$  NMR** (101 MHz,  $\text{CDCl}_3$ )  $\delta$  = 158.6 ( $\text{C}_q$ ), 158.2 (CH), 146.5 ( $\text{C}_q$ ), 144.1 ( $\text{C}_q$ ), 137.0 ( $\text{C}_q$ ), 129.0 ( $\text{C}_q$ ),



125.5 (CH), 122.6 (CH), 121.5 (CH), 120.0 (CH), 117.5 (CH), 112.7 (CH), 104.0 (CH), 36.8 (CH<sub>2</sub>), 29.4 (CH<sub>2</sub>), 28.6 (CH<sub>2</sub>), 27.0 (CH<sub>2</sub>), 26.6 (C<sub>q</sub>), 18.2 (CH<sub>2</sub>). **IR** (ATR): 2921, 2849, 1559, 1454, 1420, 1352, 1262, 1196, 1024, 967, 801, 737, 681 cm<sup>-1</sup>. **MS** (ESI) *m/z* (relative intensity): 330 (25) [M+H]<sup>+</sup>, 352 (100) [M+Na]<sup>+</sup>. **HR-MS** (ESI) *m/z* calcd for C<sub>22</sub>H<sub>24</sub>N<sub>3</sub> [M+H]<sup>+</sup> 330.1970, found 330.1965.

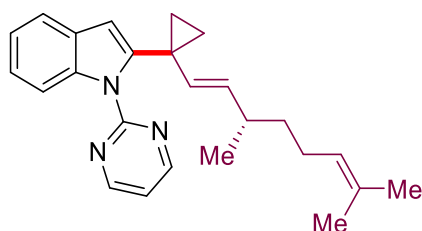

**(*S,E*)-2-(1-(3,7-Dimethylocta-1,6-dien-1-yl)cyclopropyl)-1-(pyrimidin-2-yl)-1*H*-indole (5aj)**

The general procedure **A** was followed using 1-(pyrimidin-2-yl)-1*H*-indole (**2a**) (41.6 mg, 0.20 mmol) and (*S*)-(3,7-dimethyloct-6-en-1-ylidene)cyclopropane (**4j**) (57.1 mg, 0.32 mmol) for 7.0 h. Isolation by column chromatography (*n*-hexane/CH<sub>2</sub>Cl<sub>2</sub> 8:1) yielded **5aj** (45.3 mg, 61%) as a colorless oil. **<sup>1</sup>H NMR** (400 MHz, CDCl<sub>3</sub>) δ = 8.78 (d, *J* = 4.8 Hz, 2H), 8.05 (d, *J* = 8.2 Hz, 1H), 7.58 (d, *J* = 7.6 Hz, 1H), 7.27 – 7.13 (m, 3H), 6.56 (s, 1H), 5.08 (d, *J* = 15.5 Hz, 1H), 4.97 (t, *J* = 7.1 Hz, 1H), 4.87 (dd, *J* = 15.5, 8.1 Hz, 1H), 1.87 – 1.78 (m, 2H), 1.72 – 1.67 (m, 1H), 1.67 (s, 3H), 1.54 (s, 3H), 1.38 – 1.34 (m, 2H), 1.08 – 0.94 (m, 4H), 0.66 (d, *J* = 6.7 Hz, 3H). **<sup>13</sup>C NMR** (101 MHz, CDCl<sub>3</sub>) δ = 158.4 (C<sub>q</sub>), 158.1 (CH), 143.6 (C<sub>q</sub>), 137.4 (C<sub>q</sub>), 134.1 (CH), 133.8 (CH), 131.1 (C<sub>q</sub>), 128.8 (C<sub>q</sub>), 125.0 (CH), 122.9 (CH), 121.6 (CH), 120.2 (CH), 117.5 (CH), 113.1 (CH), 106.5 (CH), 37.1 (CH<sub>2</sub>), 36.2 (CH), 25.8 (CH<sub>2</sub>), 21.8 (C<sub>q</sub>), 21.0 (CH<sub>3</sub>), 18.0 (CH<sub>3</sub>), 17.8 (CH<sub>3</sub>), 17.5 (CH<sub>2</sub>). **IR** (ATR): 2915, 2855, 1564, 1453, 1423, 1353, 1199, 965, 803, 743, 679 cm<sup>-1</sup>. **MS** (ESI) *m/z* (relative intensity): 372 (100) [M+H]<sup>+</sup>, 394 (80) [M+Na]<sup>+</sup>. **HR-MS** (ESI) *m/z* calcd for C<sub>25</sub>H<sub>30</sub>N<sub>3</sub> [M+H]<sup>+</sup> 372.2440, found 372.2434.

## 5. Derivatization of 3aa

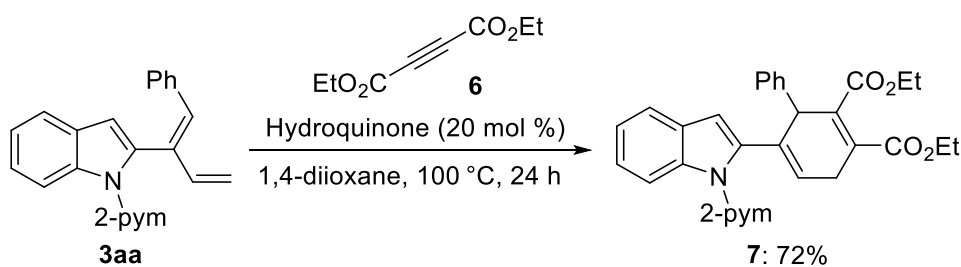

### Diethyl-6-[1-(pyrimidin-2-yl)-1H-indol-2-yl]-1,4-dihydro-[1,1'-biphenyl]-2,3-dicarboxylate (**7**)

Product **7** was prepared *via* a variation of the reported method.<sup>[3]</sup> To a 25 mL schlenk tube was added **3aa** (135 mg, 0.40 mmol, 1.0 equiv), diethyl acetylenedicarboxylate **6** (204 mg, 1.2 mmol, 3.0 equiv), hydroquinone (8.8 mg, 0.080 mmol, 20 mol %) and 1,4-dioxane (2.0 mL). Then, the mixture was stirred at 100 °C for 24 h. The solvent was removed under vacuum and the residue was purified by column chromatography on silica gel (*n*-hexane/EtOAc 5:1), affording **7** (140 mg, 72%) as a yellow solid. **M.p.** = 149–150 °C. **<sup>1</sup>H NMR** (300 MHz, CDCl<sub>3</sub>)  $\delta$  = 8.83 (d, *J* = 4.8 Hz, 2H), 8.29 (dd, *J* = 8.3, 1.0 Hz, 1H), 7.44 (d, *J* = 7.7 Hz, 1H), 7.28 – 7.22 (m, 1H), 7.21 – 7.12 (m, 5H), 7.06 (dd, *J* = 7.8, 1.8 Hz, 2H), 6.20 (s, 1H), 6.00 (dd, *J* = 4.7, 2.7 Hz, 1H), 4.61 (t, *J* = 5.9 Hz, 1H), 4.27 (q, *J* = 7.1 Hz, 2H), 4.01 (dddd, *J* = 17.9, 10.8, 7.1, 3.7 Hz, 2H), 3.44 (ddd, *J* = 23.4, 6.5, 2.8 Hz, 1H), 3.23 (dt, *J* = 23.5, 5.0 Hz, 1H), 1.34 (t, *J* = 7.1 Hz, 3H), 1.02 (t, *J* = 7.1 Hz, 3H). **<sup>13</sup>C NMR** (75 MHz, CDCl<sub>3</sub>)  $\delta$  = 167.8 (C<sub>q</sub>), 167.5 (C<sub>q</sub>), 158.4 (CH), 158.1 (C<sub>q</sub>), 140.2 (C<sub>q</sub>), 139.1 (C<sub>q</sub>), 138.3 (C<sub>q</sub>), 137.1 (C<sub>q</sub>), 133.6 (C<sub>q</sub>), 129.8 (C<sub>q</sub>), 129.2 (C<sub>q</sub>), 128.8 (CH), 128.4 (CH), 127.2 (CH), 123.5 (CH), 122.8 (CH), 122.1 (CH), 120.5 (CH), 117.3 (CH), 113.9 (CH), 109.3 (CH), 61.4 (CH<sub>2</sub>), 60.9 (CH<sub>2</sub>), 48.2 (CH), 28.8 (CH<sub>2</sub>), 14.2 (CH<sub>3</sub>), 13.9 (CH<sub>3</sub>). **IR** (ATR): 2983, 1715, 1567, 1423, 1344, 1248, 1147, 1068, 810, 744, 705 cm<sup>-1</sup>. **MS** (ESI) *m/z* (relative intensity): 494 (90) [M+H]<sup>+</sup>, 516 (100) [M+Na]<sup>+</sup>. **HR-MS** (ESI) *m/z* calcd for C<sub>30</sub>H<sub>28</sub>N<sub>3</sub>O<sub>4</sub> [M+H]<sup>+</sup> 494.2074, found 494.2072.

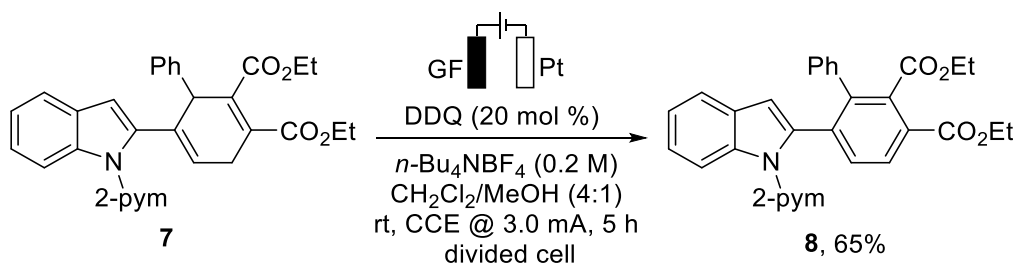

### Diethyl 6-(1-(pyrimidin-2-yl)-1H-indol-2-yl)-[1,1'-biphenyl]-2,3-dicarboxylate (**8**)

The dehydrogenative aromatization by electricity was conducted according to the related report.<sup>[4]</sup> The electrochemical dehydrogenative aromatization of **7** was carried out in a divided

cell (P4 glass frit as separator) with a GF anode (10 mm × 15 mm × 6 mm) and a Pt cathode (10 mm × 15 mm × 0.25 mm). The anodic cell was charged with **7** (49.3 mg, 0.1 mmol), 2,3-dichloro-5,6-dicyano-1,4-benzoquinone (DDQ) (5.5 mg, 0.020 mmol, 20 mol %), *n*-Bu<sub>4</sub>NBF<sub>4</sub> (32.9 mg, 1.0 mmol), CH<sub>2</sub>Cl<sub>2</sub> (4.0 mL) and MeOH (1.0 mL). The cathodic cell was charged with *n*-Bu<sub>4</sub>NBF<sub>4</sub> (32.9 mg, 1.0 mmol), CH<sub>2</sub>Cl<sub>2</sub> (4.0 mL) and MeOH (1.0 mL). Electrolysis was performed at 25 °C with a constant current of 5.0 mA maintained for 5.0 h. The anodic solution was transferred to a separating funnel charged with H<sub>2</sub>O (50 mL) and CH<sub>2</sub>Cl<sub>2</sub> (50 mL) and the GF anode was rinsed with CH<sub>2</sub>Cl<sub>2</sub> (4 × 10 mL). The organic phase was collected and dried over anhydrous sodium sulfate. The evaporation of the solvent and subsequent column chromatography on silica gel (*n*-hexane/EtOAc 5:1) afforded **8** (32.1 mg, 65%) as a yellow oil. <sup>1</sup>H NMR (300 MHz, CDCl<sub>3</sub>) δ = 8.50 (d, *J* = 4.8 Hz, 2H), 8.17 (d, *J* = 8.1 Hz, 1H), 8.06 (d, *J* = 8.1 Hz, 1H), 7.65 (d, *J* = 8.1 Hz, 1H), 7.58 (d, *J* = 7.5 Hz, 1H), 7.26 – 7.18 (m, 2H), 7.10 (d, *J* = 7.5 Hz, 1H), 7.06 – 6.98 (m, 3H), 6.81 (d, *J* = 7.5 Hz, 2H), 6.60 (s, 1H), 4.40 (q, *J* = 7.2 Hz, 2H), 3.98 (q, *J* = 7.2 Hz, 2H), 1.40 (t, *J* = 7.2 Hz, 3H), 0.90 (t, *J* = 7.2 Hz, 3H). <sup>13</sup>C NMR (101 MHz, CDCl<sub>3</sub>) δ = 168.7 (C<sub>q</sub>), 165.9 (C<sub>q</sub>), 157.9 (CH), 157.2 (C<sub>q</sub>), 139.5 (C<sub>q</sub>), 138.5 (C<sub>q</sub>), 137.8 (C<sub>q</sub>), 137.2 (C<sub>q</sub>), 137.0 (C<sub>q</sub>), 136.3 (C<sub>q</sub>), 130.7 (CH), 129.2 (CH), 129.1 (CH), 129.0 (C<sub>q</sub>), 127.5 (CH), 127.5 (CH), 127.3 (C<sub>q</sub>), 124.0 (CH), 122.2 (CH), 120.7 (CH), 117.1 (CH), 114.0 (CH), 111.3 (CH), 61.7 (CH<sub>2</sub>), 61.3 (CH<sub>2</sub>), 14.3 (CH<sub>3</sub>), 13.7 (CH<sub>3</sub>). IR (ATR): 2982, 2259, 1719, 1565, 1422, 1263, 1183, 1147, 1067, 1019, 911, 803, 733, 700 cm<sup>-1</sup>. MS (ESI) *m/z* (relative intensity): 1005 (70), 514 (100) [M+Na]<sup>+</sup>, 492 (35) [M+H]<sup>+</sup>, 446 (35). HR-MS (ESI) *m/z* calcd for C<sub>30</sub>H<sub>26</sub>N<sub>3</sub>O<sub>4</sub> [M+H]<sup>+</sup> 492.1918, found 492.1912.

## 6. Mechanistic Studies

### Catalytic reaction of **9**

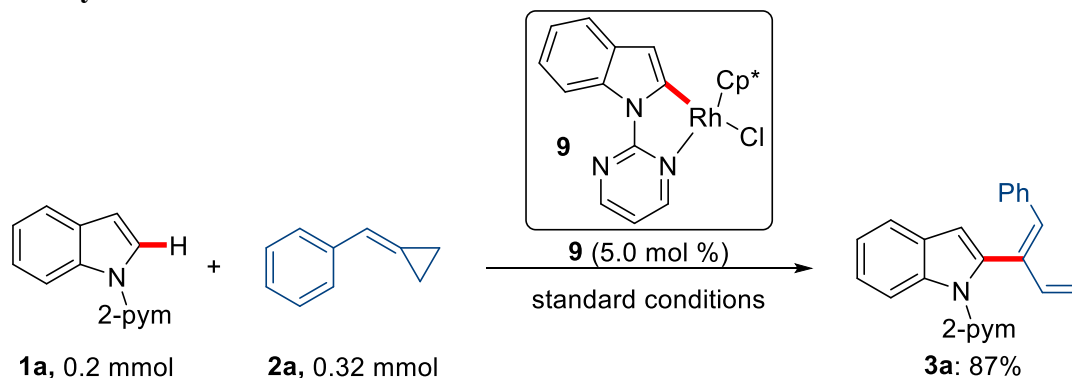

Complex **9** was synthesized according to the corresponding literature.<sup>[5]</sup> The general procedure **A** was followed using 1-(pyrimidin-2-yl)-1*H*-indole (**1a**) (39.0 mg, 0.20 mmol) and (cyclopropylidenemethyl)benzene (**2a**) (41.6 mg, 0.32 mmol) for 3.0 h with complex **9** (4.7 mg, 10  $\mu$ mol, 5.0 mol %) replacing  $[\text{Cp}^*\text{RhCl}_2]_2$ . Isolation by column chromatography (*n*-hexane/EtOAc 15:1) yielded **3aa** (56.3 mg, 87%).

### H/D Exchange

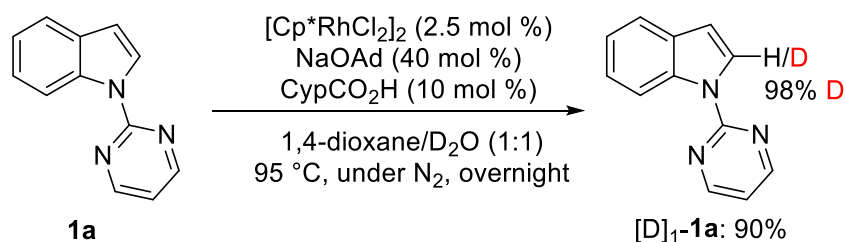

**Scheme S-2.** Deuteration of indole **1a** in the presence of D<sub>2</sub>O.

The electrolysis was carried out in an undivided cell with a GF anode (10 mm x 15 mm x 6 mm) and a Pt cathode (10 mm x 15 mm x 0.25 mm).  $[\text{Cp}^*\text{RhCl}_2]_2$  (3.0 mg, 5.0  $\mu$ mol, 2.5 mol %), NaO<sub>2</sub>CAd (16.0 mg, 0.8 mmol, 40 mol %), cyclopentanecarboxylic acid (2.3 mg, 0.2 mmol, 10 mol %), and indole **1a** (0.2 mmol) were dissolved in 1,4-dioxane (4.0 mL) and then water (4.0 mL) was added. Stirred overnight at 95 °C. The reaction mixture was extracted with EtOAc (3 x 10 mL), the organic layers combined and the solvent removed under reduced pressure. Subsequent column chromatography on silica gel (*n*-hexane/EtOAc 10:1) yielded the desired product **[D]<sub>1</sub>-1a** (35.2 mg, 90%, 98% D).

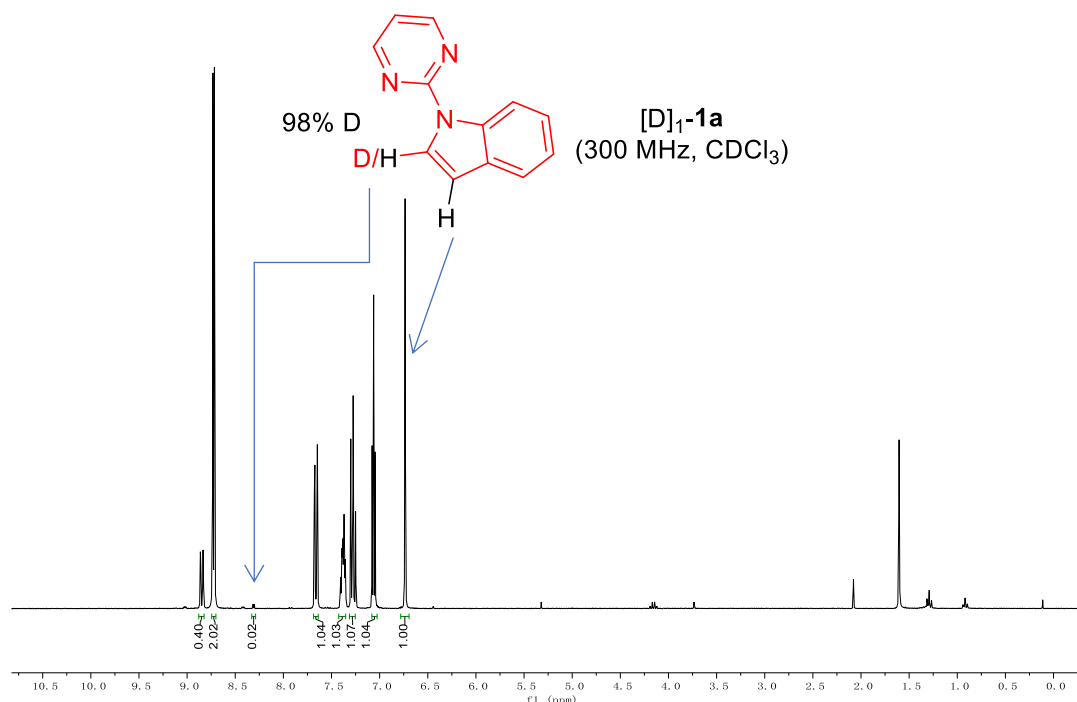

### Dienylation in the presence of D<sub>2</sub>O

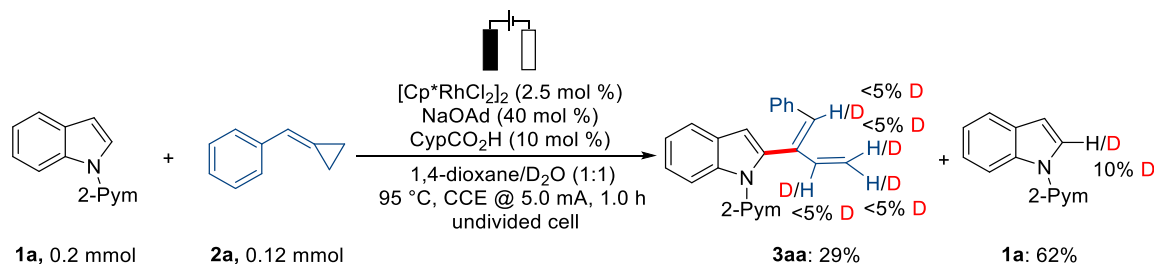

**Scheme S-3.** Reaction in the presence of D<sub>2</sub>O.

The electrolysis was carried out in an undivided cell with a GF anode (10mm x 15 mm x 6 mm) and a Pt cathode (10mm x 15 mm x 0.25 mm).  $[\text{Cp}^*\text{RhCl}_2]_2$  (3.0 mg, 5.0  $\mu\text{mol}$ , 2.5 mol %), NaO<sub>2</sub>CAd (16.0 mg, 0.8 mmol, 40 mol %), cyclopentanecarboxylic acid (2.3 mg, 0.2 mmol, 10 mol %), cyclopropane **2** (0.32 mmol, 1.6 equiv) and indole **1** (0.2 mmol) were dissolved in 1,4-dioxane (4.0 mL) and then D<sub>2</sub>O (4.0 mL) was added sequentially. At 95 °C, electrolysis was conducted with a constant current of 5.0 mA for 1.0 h. Then the mixture was transferred to a flask and the electrodes were rinsed with EtOAc (3 x 5.0 mL). The combined solvent was extracted with EtOAc (3 x 10 mL), the organic layer combined and the solvent removed under reduced pressure. Column chromatography on silica gel (*n*-hexane/EtOAc 20:1) yielded the desired product **3aa** (19.1 mg, 29%) and **1a** (22.0 mg, 62%, 10% D).

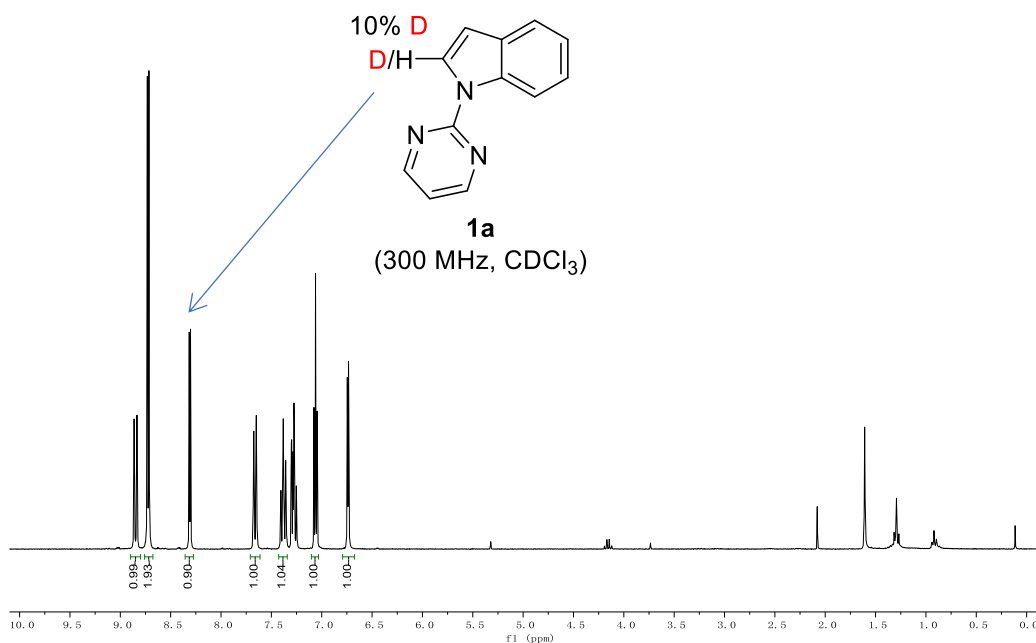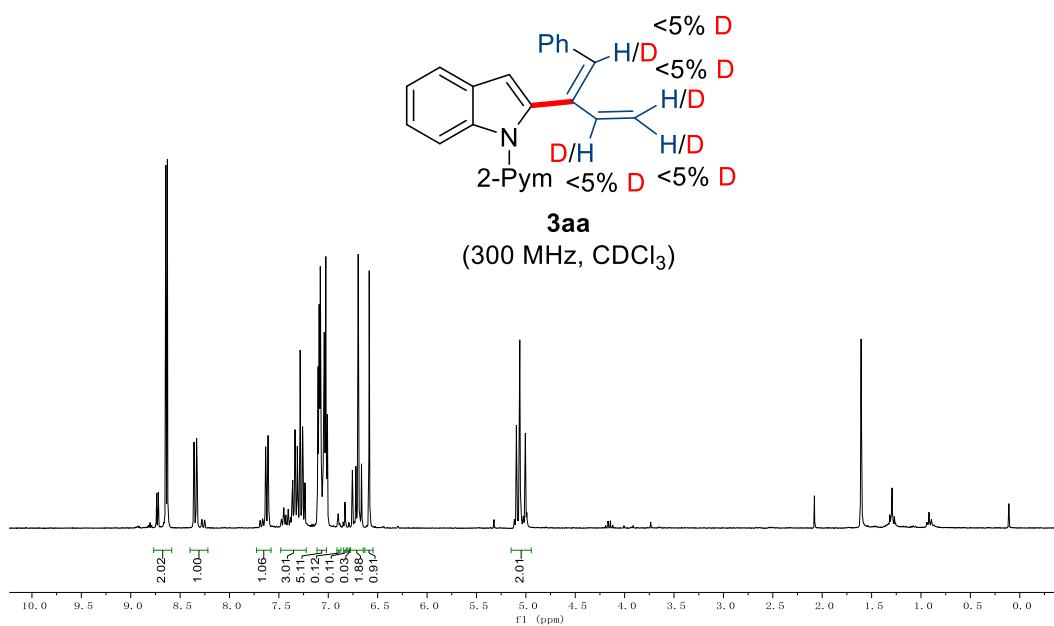

## Reaction with isotopically-labelled substrate

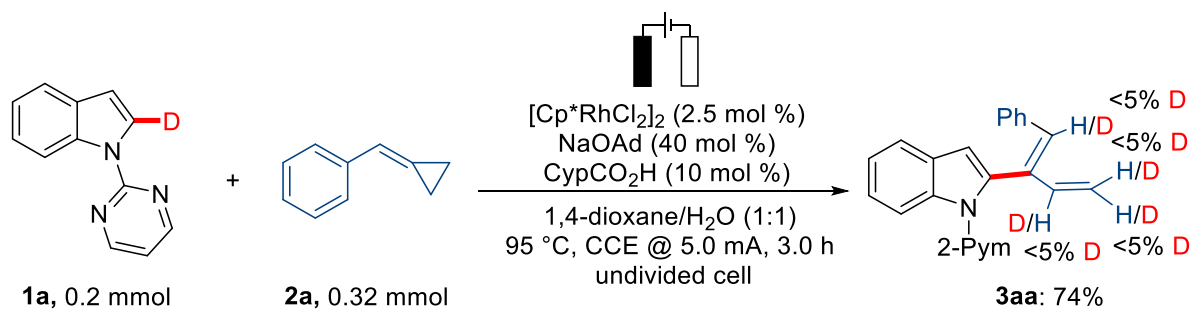

The electrolysis was carried out in an undivided cell with a GF anode (10mm x 15 mm x 6 mm) and a Pt cathode (10mm x 15 mm x 0.25 mm). [Cp\*RhCl<sub>2</sub>]<sub>2</sub> (3.0 mg, 5.0 μmol, 2.5 mol %), NaO<sub>2</sub>CAd (16.0 mg, 0.80 mmol, 40 mol %), cyclopentanecarboxylic acid (2.3 mg, 0.2 mmol, 10 mol %), cyclopropane **2a** (0.32 mmol, 1.6 equiv) and indole [D]-**1a** (0.2 mmol) were dissolved in 1,4-dioxane (4.0 mL) and then water (4.0 mL) was added sequentially. At 95 °C, electrolysis was conducted with a constant current of 5.0 mA for 3.0 hour. Then the mixture was transferred to a flask and the electrodes were rinsed with EtOAc (3 x 5.0 mL). The combined solvent was extracted with EtOAc (3 x 10 mL), the organic layers combined, and the solvent removed under reduced pressure. Column chromatography on silica gel (*n*-hexane/EtOAc 10:1) yielded the desired product **3aa** (47.9 mg, 74%).

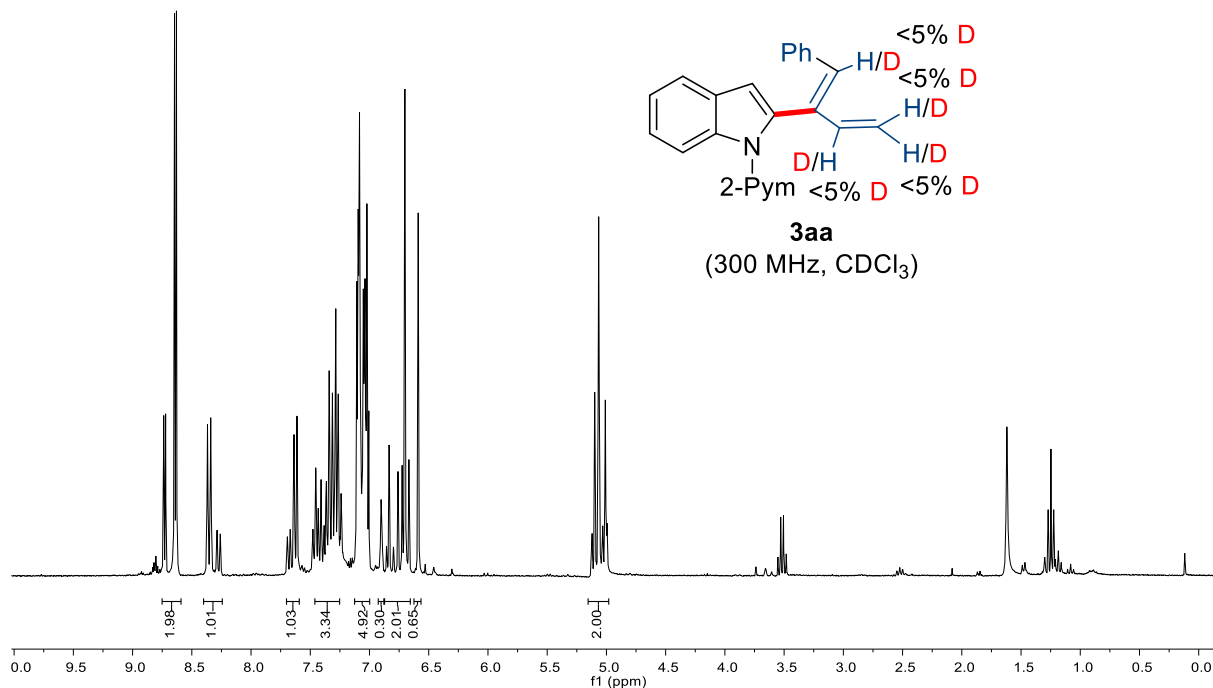

## KIE Studies

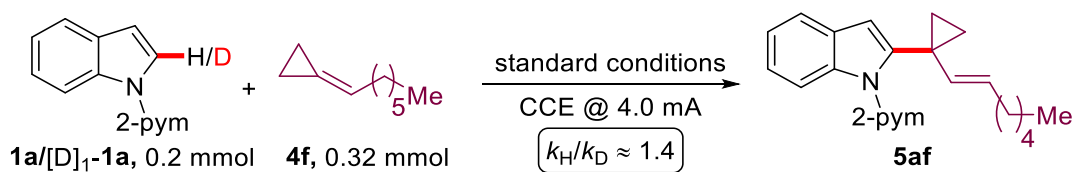

Ten parallel reactions of **1a** and **[D]<sub>1</sub>-1a** with **4f** were performed to determine the KIE by comparison of the initial reaction rates through <sup>1</sup>H NMR analysis with 1,3,5-trimethoxybenzene as the internal standard. A suspension of [Cp\**Rh*Cl<sub>2</sub>]<sub>2</sub> (3.0 mg, 5.0 μmol, 2.5 mol %), NaO<sub>2</sub>CAd (16.0 mg, 0.8 mmol, 40 mol %), cyclopentanecarboxylic acid (2.3 mg, 0.2 mmol, 10 mol %), **1a** (39.4 mg, 0.20 mmol, 1.0 equiv) or **[D]<sub>1</sub>-1a** (39.5 mg, 0.20 mmol, 1.0 equiv), **4f** (44.2 mg, 0.32 mmol, 1.6 equiv) were dissolved in 1,4-dioxane (4.0 mL) and then water (4.0 mL) was added. Reactions were stopped after 15 min, 30 min, 45 min, 60 min, 75 min respectively and conversions were determined by <sup>1</sup>H NMR.

**Table S-6:** Conversions over time.

| <i>t</i> (min)                 | 15 | 30 | 45 | 60 | 75 |
|--------------------------------|----|----|----|----|----|
| <b>5af</b> (%)                 | 13 | 17 | 24 | 30 | 36 |
| <b>[D]<sub>1</sub>-5af</b> (%) | 12 | 15 | 19 | 24 | 29 |

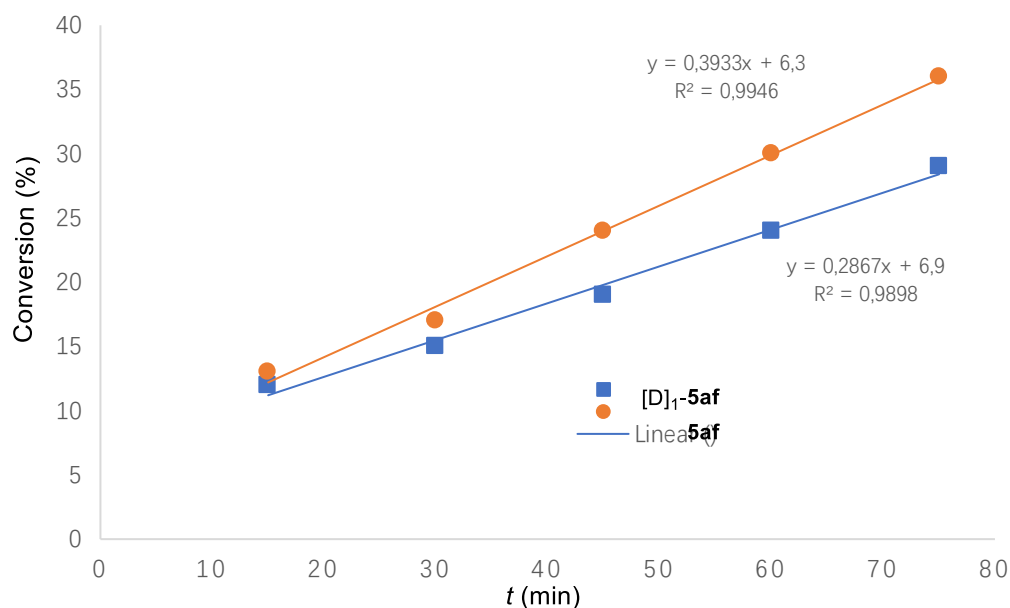



## 7. X-Ray Crystallographic Analysis

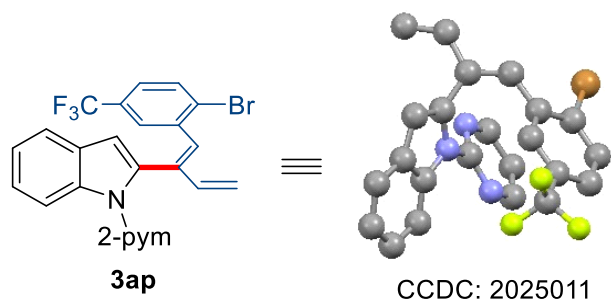

|                                             |                                                                 |
|---------------------------------------------|-----------------------------------------------------------------|
| Identification code                         | mo_1115_CG_0m                                                   |
| Empirical formula                           | C <sub>23</sub> H <sub>15</sub> BrF <sub>3</sub> N <sub>3</sub> |
| Formula weight                              | 470.29                                                          |
| Temperature/K                               | 100.0                                                           |
| Crystal system                              | triclinic                                                       |
| Space group                                 | P-1                                                             |
| a/Å                                         | 9.9177(10)                                                      |
| b/Å                                         | 10.1630(7)                                                      |
| c/Å                                         | 11.8694(12)                                                     |
| α/°                                         | 65.772(3)                                                       |
| β/°                                         | 67.588(3)                                                       |
| γ/°                                         | 69.728(3)                                                       |
| Volume/Å <sup>3</sup>                       | 982.62(16)                                                      |
| Z                                           | 2                                                               |
| ρ <sub>calc</sub> /cm <sup>3</sup>          | 1.589                                                           |
| μ/mm <sup>-1</sup>                          | 2.135                                                           |
| F(000)                                      | 472.0                                                           |
| Crystal size/mm <sup>3</sup>                | 0.534 × 0.292 × 0.05                                            |
| Radiation                                   | MoKα (λ = 0.71073)                                              |
| 2θ range for data collection/°              | 3.92 to 61.07                                                   |
| Index ranges                                | -14 ≤ h ≤ 14, -12 ≤ k ≤ 14, -16 ≤ l ≤ 16                        |
| Reflections collected                       | 37997                                                           |
| Independent reflections                     | 5982 [R <sub>int</sub> = 0.0290, R <sub>sigma</sub> = 0.0202]   |
| Data/restraints/parameters                  | 5982/0/279                                                      |
| Goodness-of-fit on F <sup>2</sup>           | 1.031                                                           |
| Final R indexes [I >= 2σ (I)]               | R <sub>1</sub> = 0.0263, wR <sub>2</sub> = 0.0711               |
| Final R indexes [all data]                  | R <sub>1</sub> = 0.0286, wR <sub>2</sub> = 0.0725               |
| Largest diff. peak/hole / e Å <sup>-3</sup> | 0.61/-0.46                                                      |

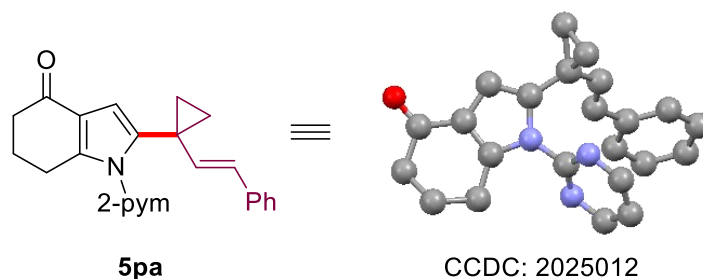

|                                             |                                                               |
|---------------------------------------------|---------------------------------------------------------------|
| Identification code                         | mo_1112_CG_0m                                                 |
| Empirical formula                           | C <sub>23</sub> H <sub>21</sub> N <sub>3</sub> O              |
| Formula weight                              | 355.43                                                        |
| Temperature/K                               | 100.0                                                         |
| Crystal system                              | monoclinic                                                    |
| Space group                                 | P2 <sub>1</sub> /c                                            |
| a/Å                                         | 9.0527(11)                                                    |
| b/Å                                         | 20.486(3)                                                     |
| c/Å                                         | 10.8176(12)                                                   |
| α/°                                         | 90                                                            |
| β/°                                         | 112.106(4)                                                    |
| γ/°                                         | 90                                                            |
| Volume/Å <sup>3</sup>                       | 1858.7(4)                                                     |
| Z                                           | 4                                                             |
| ρ <sub>calc</sub> /cm <sup>3</sup>          | 1.270                                                         |
| μ/mm <sup>-1</sup>                          | 0.079                                                         |
| F(000)                                      | 752.0                                                         |
| Crystal size/mm <sup>3</sup>                | 0.53 × 0.417 × 0.288                                          |
| Radiation                                   | MoKα (λ = 0.71073)                                            |
| 2θ range for data collection/°              | 4.524 to 68.048                                               |
| Index ranges                                | -14 ≤ h ≤ 13, -31 ≤ k ≤ 29, -16 ≤ l ≤ 14                      |
| Reflections collected                       | 40729                                                         |
| Independent reflections                     | 6592 [R <sub>int</sub> = 0.0208, R <sub>sigma</sub> = 0.0169] |
| Data/restraints/parameters                  | 6592/2/314                                                    |
| Goodness-of-fit on F <sup>2</sup>           | 1.033                                                         |
| Final R indexes [I ≥ 2σ (I)]                | R <sub>1</sub> = 0.0396, wR <sub>2</sub> = 0.1075             |
| Final R indexes [all data]                  | R <sub>1</sub> = 0.0445, wR <sub>2</sub> = 0.1129             |
| Largest diff. peak/hole / e Å <sup>-3</sup> | 0.44/-0.24                                                    |

## 8. Computational Data

All calculations were done by using DFT with the Gaussian 16, Revision A.03 package.<sup>[6]</sup> Geometry optimizations of all stationary points were carried out at the TPSS<sup>[7]</sup> level of theory in combination with D3 dispersion corrections with the Becke-Johnson damping scheme (D3BJ).<sup>[8]</sup> All atoms were described with a def2-SVP<sup>[9]</sup> basis set in combination with a Stuttgart-Dresden effective core potential for rhodium.<sup>[10]</sup> Analytical frequency calculations were carried out at the same level of theory in order to identify all intermediates (no imaginary frequencies) and transition states (only one imaginary frequency) and to provide thermal and non-thermal corrections to the free energy in gas-phase at 298.15 K and 1 atm.

The electronic energies were then refined through single-point calculations on the optimized structures at the PBE0<sup>[11]</sup> and PW6B95<sup>[12]</sup> level of theory including dispersion corrections (D3BJ). All atoms were described with a def2-TZVP<sup>[9]</sup> basis set in combination with a Stuttgart-Dresden effective core potential for rhodium.<sup>[10]</sup> Solvent effects were taken into consideration in the single-point calculations through the use of the SMD<sup>[13]</sup> model with a dielectric constant of  $\epsilon = 2.2099$ , which corresponds to 1,4-dioxane. Unless otherwise stated, all reported energies are Gibbs free energies in kcal mol<sup>-1</sup>, which were calculated by adding the gas-phase thermal and non-thermal corrections at 298.15 K to the single-point energies.

3D structures of optimized geometries were constructed with the CYLview software.<sup>[14]</sup>

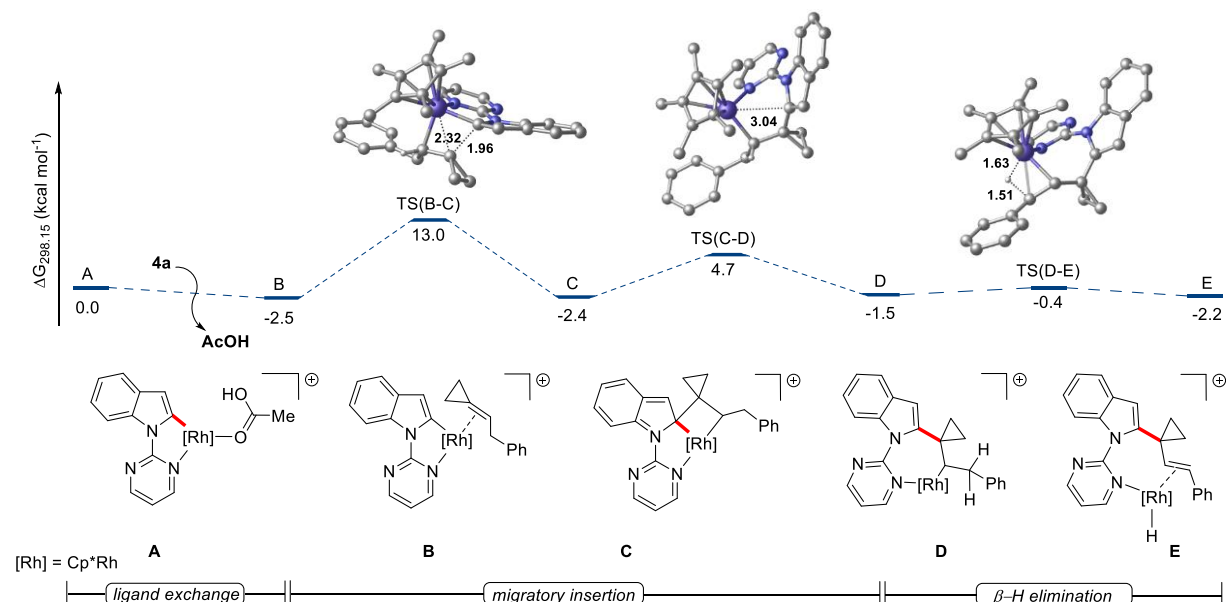

**Figure S-1.** Gibbs free energy profile in kcal mol<sup>-1</sup> for the migratory insertion and  $\beta$ -H elimination pathway for the C-H cyclopropylation of indole **1a** with benzyl cyclopropane **4a** at the PW6B95-D3(BJ)/def2-TZVP+SMD(1,4-dioxane)//TPSS-D3(BJ)/def2-SVP level of theory. Non-relevant hydrogen atoms in the transition state structures were omitted for clarity. Bond distances are given in Å.

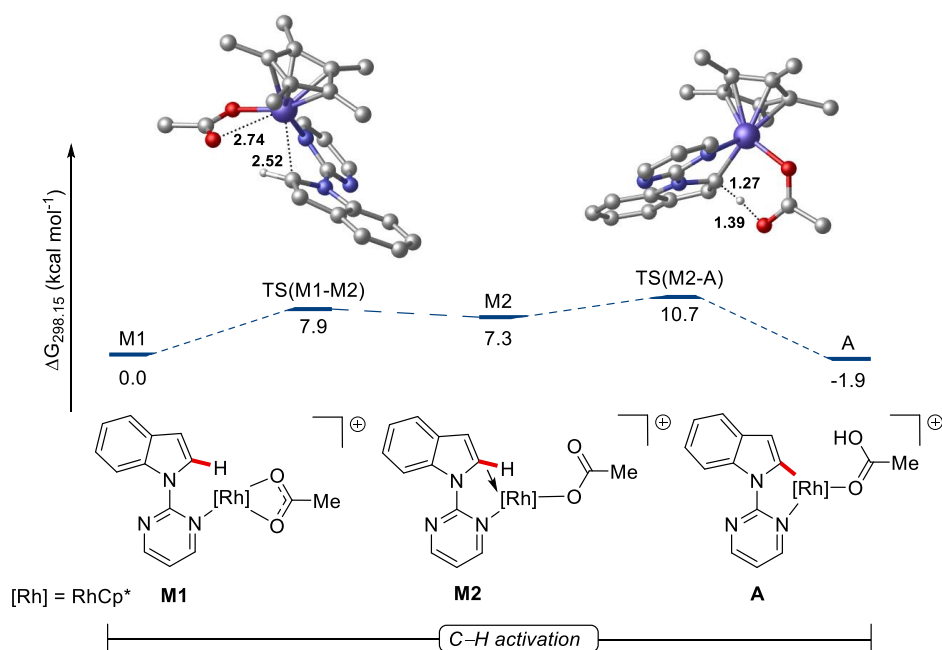

**Figure S-2.** Gibbs free energy profile in kcal mol<sup>-1</sup> for the initial C–H activation of indole **1a** (with the model acetate ligand) at the PW6B95-D3(BJ)/def2-TZVP+SMD(1,4-Dioxane)//TPSS-D3(BJ)/def2-SVP level of theory. Non-relevant hydrogen atoms were omitted in the transition state structures for the clarity. Bond distances are given in Å.

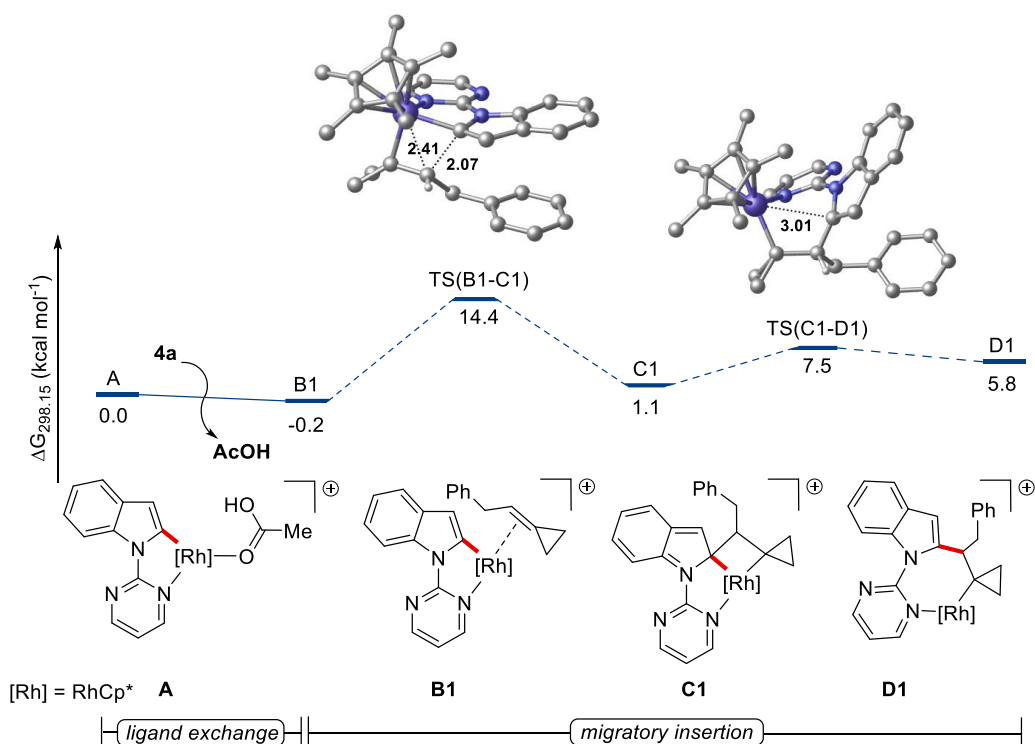

**Figure S-3.** Gibbs free energy profile in kcal mol<sup>-1</sup> for the other possible migratory insertion at the PW6B95-D3(BJ)/def2-TZVP+SMD(1,4-dioxane)//TPSS-D3(BJ)/def2-SVP level of theory. Non-relevant hydrogen atoms were omitted in the transition state structures for the clarity. Bond distances are given in Å.

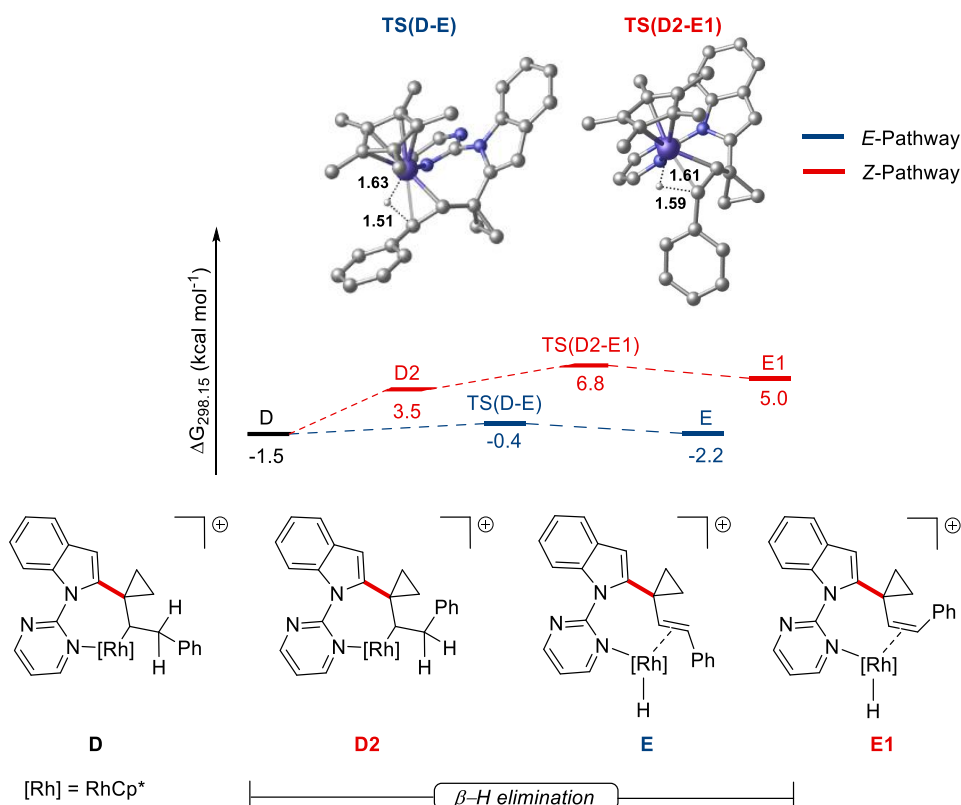

**Figure S-4.** Gibbs free energy profile in kcal mol<sup>-1</sup> for the regioselective  $\beta$ -H elimination from the intermediate **D** at the PW6B95-D3(BJ)/def2-TZVP+SMD(1,4-dioxane)//TPSS-D3(BJ)/def2-SVP level of theory. Non-relevant hydrogen atoms were omitted in the transition state structures for the clarity. Bond distances are given in Å.

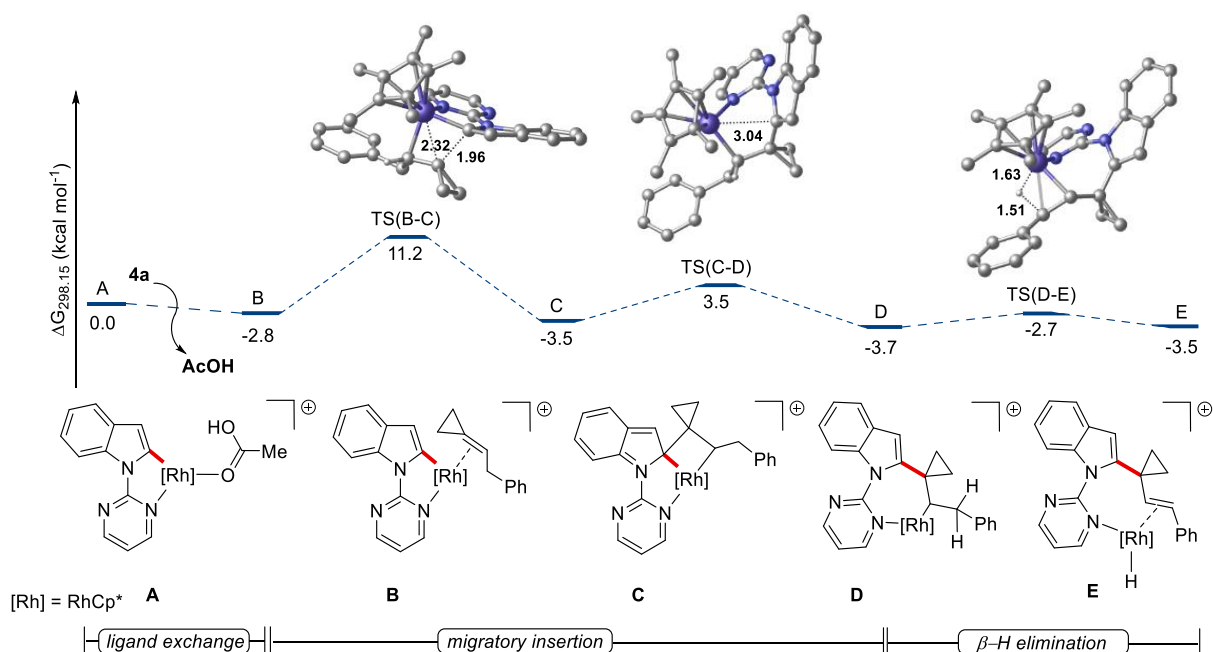

**Figure S-5.** Gibbs free energy profile in kcal mol<sup>-1</sup> for the migratory insertion and  $\beta$ -H elimination for the C-H cyclopropylation pathway of indole with benzyl cyclopropane **4a** at the PBE0-D3(BJ)/def2-TZVP+ SMD(1,4-Dioxane)//TPSS-D3(BJ)/def2-SVP level of theory. Non-relevant hydrogen atoms were omitted in the transition state structures for the clarity. Bond distances are given in Å.

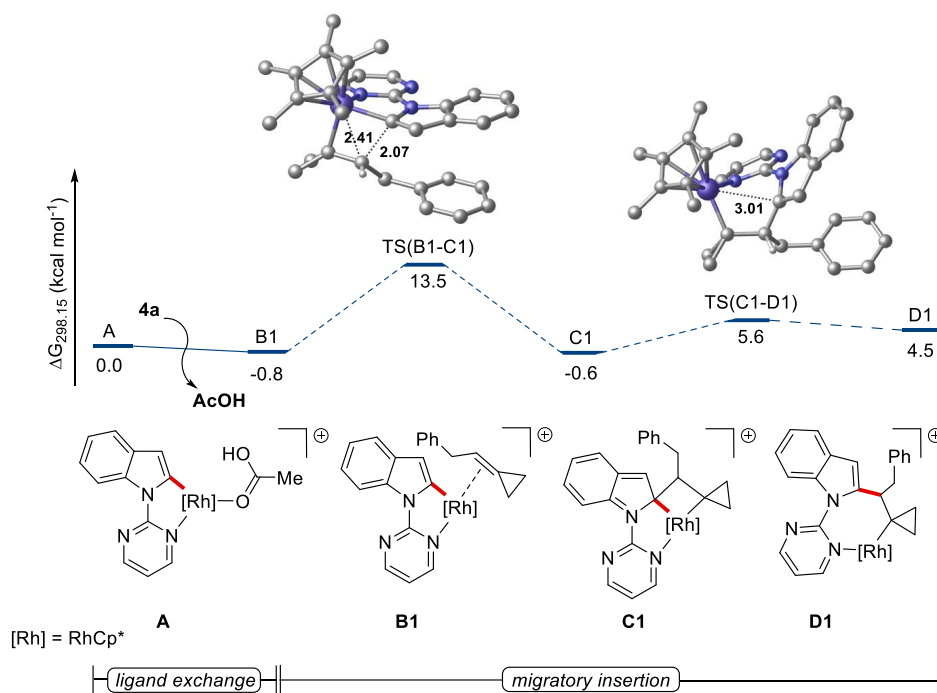

**Figure S-6.** Gibbs free energy profile in kcal mol<sup>-1</sup> for the other possible migratory insertion at the PBE0-D3(BJ)/def2-TZVP+SMD(1,4-dioxane)//TPSS-D3(BJ)/def2-SVP level of theory. Non-relevant hydrogen atoms were omitted in the transition state structures for the clarity. Bond distances are given in Å.

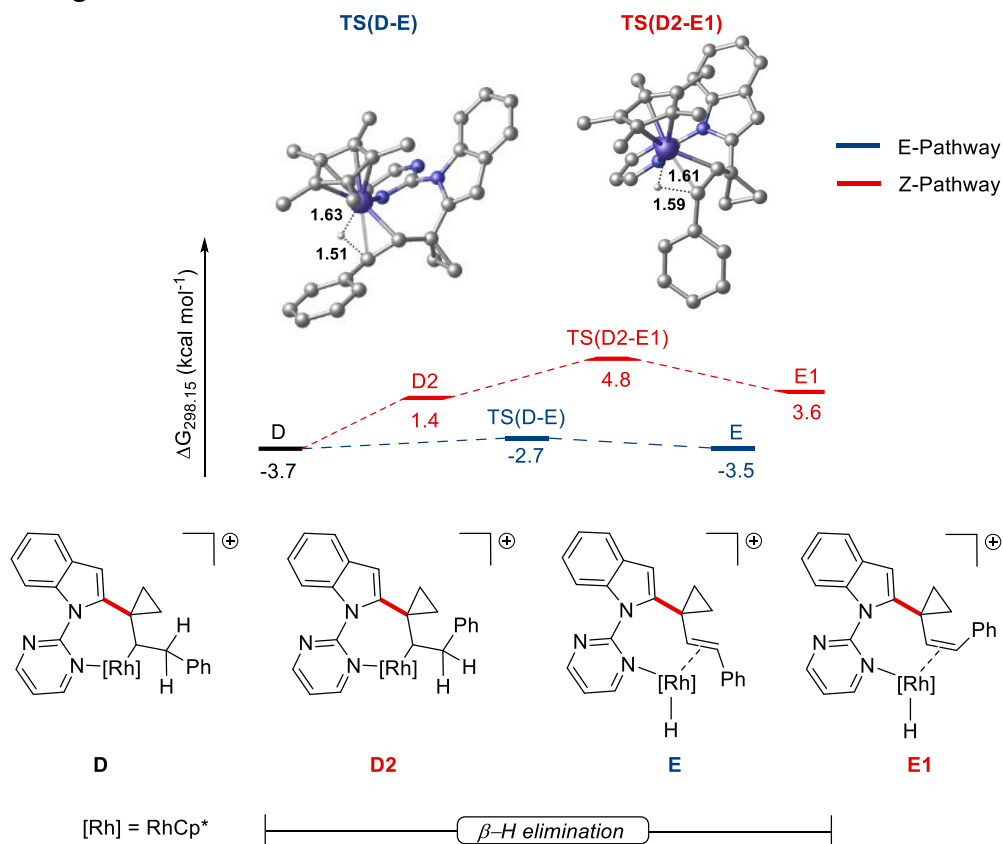

**Figure S-7.** Gibbs free energy profile in kcal mol<sup>-1</sup> for the regioselective β-H elimination from the intermediate **D** at the PBE0-D3(BJ)/def2-TZVP+SMD(1,4-dioxane)//TPSS-D3(BJ)/def2-SVP level of theory. Non-relevant hydrogen atoms were omitted in the transition state structures for the clarity. Bond distances are given in Å.

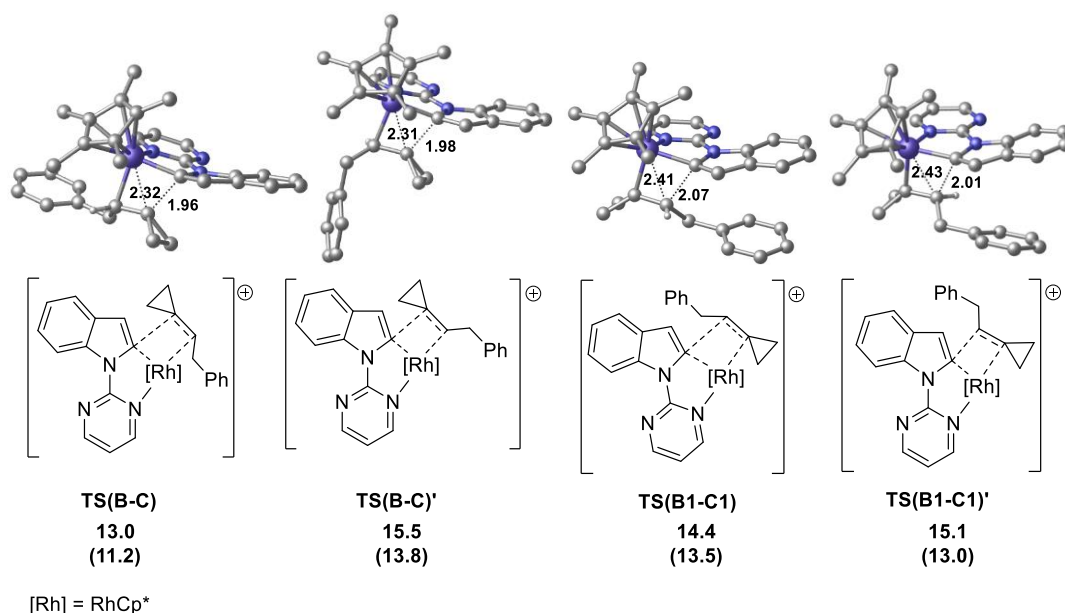

**Figure S-8.** Comparison of the Gibbs free energies in kcal mol<sup>-1</sup> for the four possible regioselective migratory insertion transition states at the PW6B95-D3(BJ)/def2-TZVP+SMD(1,4-Dioxane)//TPSS-D3(BJ)/def2-SVP level of theory (values in parenthesis are at the PBE0-D3(BJ)/def2-TZVP+SMD(1,4-dioxane)//TPSS-D3(BJ)/def2-SVP level of theory). Non-relevant hydrogen atoms were omitted in the transition state structures for the clarity. Bond distances are given in Å.

## Cartesian Coordinates and Energies of all the optimized Geometries

### Acetic Acid

Lowest frequency = 59.83 cm<sup>-1</sup>

E(PBE0-D3(BJ)/def2-TZVP+SMD(1,4-dioxane)) = -228.939159 E<sub>h</sub>

E(PW6B95-D3(BJ)/def2-TZVP+SMD(1,4-dioxane)) = -229.455149 E<sub>h</sub>

G<sub>corr</sub> (298.15) = 0.033336 E<sub>h</sub>

Charge = 0, Multiplicity = 1

|   |             |             |             |
|---|-------------|-------------|-------------|
| C | -1.93863449 | 1.66002054  | -0.00061440 |
| O | -0.72668240 | 1.59345975  | 0.00000275  |
| O | -2.60512368 | 2.84863765  | 0.00010900  |
| H | -1.90870955 | 3.53925843  | 0.00040018  |
| C | -2.89694716 | 0.49173177  | -0.00000979 |
| H | -3.54984800 | 0.54184601  | 0.88802736  |
| H | -3.55004945 | 0.54115900  | -0.88793380 |
| H | -2.32835475 | -0.44760277 | 0.00029729  |

### 4a

Lowest frequency = 19.82 cm<sup>-1</sup>

E(PBE0-D3(BJ)/def2-TZVP+SMD(1,4-dioxane)) = -425.987606 E<sub>h</sub>

E(PW6B95-D3(BJ)/def2-TZVP+SMD(1,4-dioxane)) = -427.059458 E<sub>h</sub>

$G_{\text{corr}}(298.15) = 0.154829 E_h$

Charge = 0, Multiplicity = 1

|   |             |             |             |
|---|-------------|-------------|-------------|
| C | -0.99990285 | -0.93966131 | -2.43134331 |
| C | -0.37308294 | -2.08049280 | -2.13945739 |
| C | -0.89273504 | 0.47241160  | -2.83454677 |
| H | -0.53788000 | 1.21046206  | -2.10117769 |
| H | -0.62225203 | 0.71181190  | -3.87267978 |
| C | -2.25789851 | -0.19533059 | -2.58197720 |
| H | -2.89688144 | -0.40098557 | -3.45228659 |
| H | -2.81410719 | 0.09674522  | -1.68008686 |
| H | -0.96610247 | -2.95951852 | -1.84964262 |
| C | 1.12836521  | -2.24640843 | -2.14329659 |
| H | 1.41559048  | -3.05049924 | -2.84692340 |
| H | 1.59020821  | -1.31266741 | -2.51465472 |
| C | 1.68851765  | -2.58321004 | -0.76743702 |
| C | 2.50986380  | -3.70755180 | -0.56986670 |
| C | 1.39248157  | -1.76482950 | 0.34039113  |
| C | 3.03106029  | -4.00504966 | 0.69835098  |
| H | 2.74504696  | -4.35695639 | -1.42157427 |
| C | 1.91237359  | -2.05685160 | 1.60765344  |
| H | 0.74157507  | -0.89398618 | 0.20149897  |
| C | 2.73460213  | -3.17954480 | 1.79152208  |
| H | 3.66887137  | -4.88574677 | 0.83183508  |
| H | 1.67345117  | -1.40764683 | 2.45727179  |
| H | 3.13938335  | -3.41024637 | 2.78277806  |

### Intermediate M1

Lowest frequency = 20.95  $\text{cm}^{-1}$

$E(\text{PBE0-D3(BJ)/def2-TZVP+SMD}(1,4\text{-dioxane})) = -1355.111479 E_h$

$E(\text{PW6B95-D3(BJ)/def2-TZVP+SMD}(1,4\text{-dioxane})) = -1358.193110 E_h$

$G_{\text{corr}}(298.15) = 0.396368 E_h$

Charge = 1, Multiplicity = 1

|   |             |             |             |
|---|-------------|-------------|-------------|
| C | 2.84915351  | -1.51558518 | -0.32492980 |
| C | 2.93572806  | -0.45165561 | -1.31423008 |
| C | 1.50367187  | -2.06386723 | -0.39551812 |
| C | 1.64575372  | -0.32076179 | -1.95704044 |
| C | 0.76168113  | -1.33779676 | -1.39845049 |
| C | 4.14326788  | 0.39122582  | -1.57317195 |
| H | 4.69717336  | 0.59073911  | -0.64277571 |
| H | 4.81972352  | -0.14261961 | -2.26646584 |
| H | 3.87410775  | 1.35355847  | -2.03383713 |
| C | 1.28615359  | 0.64032357  | -3.04878927 |
| H | 1.88557800  | 1.56211772  | -2.99038160 |
| H | 1.47172543  | 0.17752777  | -4.03554649 |
| H | 0.22034264  | 0.91479119  | -3.00384311 |
| C | -0.61873234 | -1.65581443 | -1.87793505 |
| H | -1.24062421 | -2.09241314 | -1.08275956 |



|    |             |             |             |
|----|-------------|-------------|-------------|
| H  | -1.13391817 | -0.76876060 | -2.27495924 |
| H  | -0.54902847 | -2.39390815 | -2.69909893 |
| C  | 0.97382514  | -3.17866289 | 0.44727929  |
| H  | -0.11722158 | -3.10171467 | 0.56607219  |
| H  | 1.20485075  | -4.14502099 | -0.03898098 |
| H  | 1.43854585  | -3.18083206 | 1.44527426  |
| C  | 3.96222331  | -2.00389418 | 0.55120257  |
| H  | 4.52507378  | -2.80588547 | 0.03863208  |
| H  | 4.66827579  | -1.19305314 | 0.78828942  |
| H  | 3.57381089  | -2.41311967 | 1.49652874  |
| Rh | 1.45773839  | 0.02269870  | 0.14450860  |
| C  | -2.39669088 | -1.58957508 | 1.45384632  |
| C  | -3.44833891 | -1.47158368 | 0.46671572  |
| H  | -2.31403317 | -2.35331933 | 2.22763502  |
| C  | -3.20153125 | -0.28390385 | -0.28099228 |
| C  | -1.53961231 | -0.53600648 | 1.28828324  |
| N  | -1.99878544 | 0.27813168  | 0.22923377  |
| C  | -1.36861392 | 1.42440191  | -0.21216881 |
| N  | -0.03311292 | 1.58801077  | 0.04671547  |
| C  | 0.48862417  | 2.81752104  | -0.20006602 |
| C  | -1.56100391 | 3.49625659  | -1.18655182 |
| H  | 1.53912383  | 2.94293503  | 0.07909029  |
| H  | -2.18764474 | 4.19327043  | -1.75705041 |
| N  | -2.11019435 | 2.32156440  | -0.87660866 |
| C  | -0.25438769 | 3.83195386  | -0.79571893 |
| H  | 0.18146121  | 4.81450216  | -0.98939246 |
| C  | -4.56230744 | -2.27308816 | 0.15305192  |
| C  | -5.39747556 | -1.87972819 | -0.89670770 |
| H  | -4.76631659 | -3.18483042 | 0.72287723  |
| H  | -6.27059796 | -2.48761730 | -1.15300934 |
| C  | -5.13284379 | -0.70340387 | -1.62887508 |
| C  | -4.03494079 | 0.11680981  | -1.33416603 |
| H  | -5.80670212 | -0.41266927 | -2.44083900 |
| H  | -3.84907222 | 1.03893774  | -1.88403049 |
| O  | 2.59175467  | 1.43518041  | 1.31442861  |
| C  | 2.12006236  | 0.97213038  | 2.41669383  |
| O  | 1.31878168  | -0.02090956 | 2.32268962  |
| C  | 2.51561467  | 1.54751954  | 3.74259974  |
| H  | 3.39165296  | 0.99063776  | 4.12112347  |
| H  | 2.79883612  | 2.60501710  | 3.63455153  |
| H  | 1.69657145  | 1.43102740  | 4.46803750  |
| H  | -0.67050638 | -0.23582713 | 1.87137203  |

### Transition State **TS(M1-M2)**

Lowest frequency = -84.19 cm<sup>-1</sup>

E(PBE0-D3(BJ)/def2-TZVP+SMD(1,4-dioxane)) = -1355.097635 E<sub>h</sub>

E(PW6B95-D3(BJ)/def2-TZVP+SMD(1,4-dioxane)) = -1358.178657 E<sub>h</sub>

G<sub>corr</sub> (298.15) = 0.394532 E<sub>h</sub>

Charge = 1, Multiplicity = 1

|    |             |             |             |
|----|-------------|-------------|-------------|
| C  | 2.42816592  | -1.42670812 | -0.98944802 |
| C  | 2.27957043  | -0.19108685 | -1.75505611 |
| C  | 1.14544826  | -2.07091098 | -0.94098655 |
| C  | 0.89310115  | -0.12045872 | -2.21296292 |
| C  | 0.18586750  | -1.26605849 | -1.70333396 |
| C  | 3.37786775  | 0.77392477  | -2.07056340 |
| H  | 4.04738431  | 0.90245141  | -1.20545920 |
| H  | 3.98049574  | 0.39497493  | -2.91708545 |
| H  | 2.98001753  | 1.75997088  | -2.35637918 |
| C  | 0.30941974  | 0.95888005  | -3.07048337 |
| H  | 0.82055038  | 1.92224352  | -2.91741959 |
| H  | 0.42385040  | 0.68462323  | -4.13541782 |
| H  | -0.76525262 | 1.09364737  | -2.87205467 |
| C  | -1.23578290 | -1.62718627 | -2.00550419 |
| H  | -1.66142167 | -2.27978065 | -1.23034728 |
| H  | -1.87518557 | -0.73369706 | -2.08230150 |
| H  | -1.28722934 | -2.16297421 | -2.97158104 |
| C  | 0.85864714  | -3.35333061 | -0.22451552 |
| H  | -0.22182784 | -3.54224106 | -0.15468934 |
| H  | 1.32220706  | -4.19317075 | -0.77412640 |
| H  | 1.28140510  | -3.33015484 | 0.79266520  |
| C  | 3.68989983  | -1.91804644 | -0.35211957 |
| H  | 4.24794072  | -2.54892750 | -1.06859459 |
| H  | 4.33890170  | -1.07847186 | -0.05978074 |
| H  | 3.47033153  | -2.51763594 | 0.54341506  |
| Rh | 1.01395283  | -0.09831715 | -0.07295229 |
| C  | -1.81238634 | -1.57583522 | 1.46952440  |
| C  | -3.12047933 | -1.28419729 | 0.95162665  |
| H  | -1.48110601 | -2.50117780 | 1.94067502  |
| C  | -3.12437971 | 0.08505960  | 0.53648156  |
| C  | -1.03965774 | -0.43702909 | 1.34828229  |
| N  | -1.83886176 | 0.59318003  | 0.78822531  |
| C  | -1.28967082 | 1.80019781  | 0.39842761  |
| N  | 0.05789741  | 1.77764073  | 0.19550809  |
| C  | 0.68153933  | 2.95736544  | -0.00275257 |
| C  | -1.44733734 | 4.03247963  | -0.03204539 |
| H  | 1.77136840  | 2.91396688  | -0.08863085 |
| H  | -2.09544951 | 4.90442066  | -0.18179319 |
| N  | -2.06350289 | 2.87534613  | 0.24393441  |
| C  | -0.04862381 | 4.14138224  | -0.11055995 |
| H  | 0.44789117  | 5.09952969  | -0.27973724 |
| C  | -4.29072210 | -2.05866786 | 0.79116558  |
| C  | -5.41274791 | -1.45953088 | 0.21876191  |
| H  | -4.31174073 | -3.10466792 | 1.11166532  |
| H  | -6.33106480 | -2.03994640 | 0.08856690  |
| C  | -5.38820646 | -0.10486370 | -0.19115601 |
| C  | -4.24793942 | 0.69289537  | -0.03996773 |
| H  | -6.28999762 | 0.33703539  | -0.62633647 |
| H  | -4.23459874 | 1.74457859  | -0.32993593 |

|   |             |             |            |
|---|-------------|-------------|------------|
| O | 2.39269787  | 0.70289538  | 1.29819584 |
| C | 2.47839123  | -0.14304792 | 2.29164358 |
| O | 1.75259994  | -1.15564187 | 2.34760966 |
| C | 3.52913783  | 0.16292004  | 3.33759732 |
| H | 3.73070260  | 1.24262476  | 3.40181573 |
| H | 3.20962374  | -0.23414623 | 4.31256944 |
| H | 4.46668322  | -0.34694252 | 3.05128071 |
| H | -0.13140179 | -0.21181433 | 1.92528745 |

**Intermediate M2**

Lowest frequency = 20.78 cm<sup>-1</sup>

E(PBE0-D3(BJ)/def2-TZVP+SMD(1,4-dioxane)) = -1355.099837 E<sub>h</sub>

E(PW6B95-D3(BJ)/def2-TZVP+SMD(1,4-dioxane)) = -1358.180560 E<sub>h</sub>

G<sub>corr</sub> (298.15) = 0.395433 E<sub>h</sub>

Charge = 1, Multiplicity = 1

|    |             |             |             |
|----|-------------|-------------|-------------|
| C  | 2.41815719  | -1.24170071 | -1.01083482 |
| C  | 2.24618150  | 0.01556864  | -1.72687104 |
| C  | 1.16262871  | -1.94007674 | -1.01977724 |
| C  | 0.87019539  | 0.05183326  | -2.22038850 |
| C  | 0.19742275  | -1.13599933 | -1.77971813 |
| C  | 3.32222814  | 1.01769709  | -2.00642410 |
| H  | 4.00696026  | 1.11536087  | -1.14927118 |
| H  | 3.91923643  | 0.69837193  | -2.88151427 |
| H  | 2.90289570  | 2.00987562  | -2.23656632 |
| C  | 0.27197870  | 1.14201319  | -3.05577449 |
| H  | 0.72346097  | 2.12166899  | -2.83252891 |
| H  | 0.45226654  | 0.92949734  | -4.12565351 |
| H  | -0.81673394 | 1.21436018  | -2.90685763 |
| C  | -1.20219489 | -1.53615679 | -2.13261307 |
| H  | -1.61733672 | -2.24617120 | -1.40346568 |
| H  | -1.87646895 | -0.66624694 | -2.18162287 |
| H  | -1.21000684 | -2.02399204 | -3.12512179 |
| C  | 0.92233638  | -3.28460127 | -0.40710151 |
| H  | -0.14992366 | -3.52848715 | -0.38097073 |
| H  | 1.43567536  | -4.06095638 | -1.00371956 |
| H  | 1.31914991  | -3.30683932 | 0.62010699  |
| C  | 3.68702675  | -1.72074807 | -0.37935279 |
| H  | 4.27743137  | -2.28236264 | -1.12728837 |
| H  | 4.30048804  | -0.87716423 | -0.02734929 |
| H  | 3.47624485  | -2.38141709 | 0.47351279  |
| Rh | 0.91452813  | -0.01067990 | -0.06431920 |
| C  | -1.54371494 | -1.56358294 | 1.44647524  |
| C  | -2.85266627 | -1.38396395 | 0.90747033  |
| H  | -1.11835077 | -2.46695220 | 1.88340076  |
| C  | -2.99330536 | 0.00231618  | 0.56113652  |
| C  | -0.87789454 | -0.33945111 | 1.39372571  |
| N  | -1.78937764 | 0.63088885  | 0.87797031  |
| C  | -1.31627780 | 1.87517502  | 0.48660030  |

|   |             |             |             |
|---|-------------|-------------|-------------|
| N | 0.02236015  | 1.89618313  | 0.23043074  |
| C | 0.59366915  | 3.09679235  | 0.01252401  |
| C | -1.57307094 | 4.09850727  | 0.08660530  |
| H | 1.67827746  | 3.09803338  | -0.13044975 |
| H | -2.25631861 | 4.94877113  | -0.02506685 |
| N | -2.13740544 | 2.91577784  | 0.37869706  |
| C | -0.18486695 | 4.25489507  | -0.05364765 |
| H | 0.26912919  | 5.23123237  | -0.23831235 |
| C | -3.93012537 | -2.27152922 | 0.66708455  |
| C | -5.08954552 | -1.76527712 | 0.08726700  |
| H | -3.84686123 | -3.32884478 | 0.93586232  |
| H | -5.93779692 | -2.42939346 | -0.10310996 |
| C | -5.19766815 | -0.39232971 | -0.25620663 |
| C | -4.15826307 | 0.51443556  | -0.02940737 |
| H | -6.12983872 | -0.02898062 | -0.70021382 |
| H | -4.24964712 | 1.57539585  | -0.26899803 |
| O | 2.07096766  | 0.48833385  | 1.58460285  |
| C | 2.31639228  | -0.52416035 | 2.39598065  |
| O | 1.80128668  | -1.64189758 | 2.26901060  |
| C | 3.31551588  | -0.20554075 | 3.49417585  |
| H | 3.27244215  | 0.85484616  | 3.78523091  |
| H | 3.13316862  | -0.85795818 | 4.36089388  |
| H | 4.33147877  | -0.41411454 | 3.11278310  |
| H | -0.10534270 | -0.01173482 | 2.09607562  |

### Transition State **TS(M2-A)**

Lowest frequency = -220.96 cm<sup>-1</sup>

E(PBE0-D3(BJ)/def2-TZVP+SMD(1,4-dioxane)) = -1355.098918 E<sub>h</sub>

E(PW6B95-D3(BJ)/def2-TZVP+SMD(1,4-dioxane)) = -1358.172383 E<sub>h</sub>

G<sub>corr</sub> (298.15) = 0.392729 E<sub>h</sub>

Charge = 1, Multiplicity = 1

|   |             |             |             |
|---|-------------|-------------|-------------|
| C | 2.67343593  | -1.55750620 | -0.23284123 |
| C | 2.82982634  | -0.43581244 | -1.15018924 |
| C | 1.43669743  | -2.22779072 | -0.53307610 |
| C | 1.67250918  | -0.42940574 | -2.01869479 |
| C | 0.78825467  | -1.50797236 | -1.62830055 |
| C | 4.01692250  | 0.47675568  | -1.20966205 |
| H | 4.37952969  | 0.71876264  | -0.19791090 |
| H | 4.84616881  | -0.00573186 | -1.75999178 |
| H | 3.77855916  | 1.41883342  | -1.72838026 |
| C | 1.42094908  | 0.53528166  | -3.13625175 |
| H | 1.92178429  | 1.50063998  | -2.96409691 |
| H | 1.82104373  | 0.11529146  | -4.07747855 |
| H | 0.34465352  | 0.71635996  | -3.28194222 |
| C | -0.48791971 | -1.89945162 | -2.31197030 |
| H | -1.19555357 | -2.35797660 | -1.60441930 |
| H | -0.98226699 | -1.02683773 | -2.76693072 |
| H | -0.28308541 | -2.62958119 | -3.11648637 |

|    |             |             |             |
|----|-------------|-------------|-------------|
| C  | 0.95509549  | -3.50216781 | 0.09259388  |
| H  | -0.11688406 | -3.66098157 | -0.09143872 |
| H  | 1.50502187  | -4.35434332 | -0.34803628 |
| H  | 1.13183327  | -3.51609610 | 1.17968903  |
| C  | 3.65139363  | -1.92468377 | 0.83939157  |
| H  | 4.55254764  | -2.37533407 | 0.38478713  |
| H  | 3.96315518  | -1.03057695 | 1.40343449  |
| H  | 3.22294429  | -2.65133068 | 1.54549454  |
| Rh | 1.02296558  | -0.17257599 | 0.04031735  |
| C  | -1.74572325 | -1.59791958 | 1.10115729  |
| C  | -3.07785689 | -1.36227488 | 0.63134449  |
| H  | -1.41145390 | -2.47465973 | 1.65711077  |
| C  | -3.10724870 | -0.05117460 | 0.05637166  |
| C  | -0.95134621 | -0.47892938 | 0.83704877  |
| N  | -1.81475511 | 0.46686784  | 0.17631855  |
| C  | -1.28519929 | 1.65787468  | -0.25181868 |
| N  | 0.08367692  | 1.68314056  | -0.24954816 |
| C  | 0.69009680  | 2.85395118  | -0.52411516 |
| C  | -1.44852569 | 3.81939384  | -0.95459050 |
| H  | 1.78261859  | 2.85776627  | -0.46459637 |
| H  | -2.09682969 | 4.64259425  | -1.27852194 |
| N  | -2.06299634 | 2.67426918  | -0.63050541 |
| C  | -0.05448877 | 3.97949666  | -0.88017987 |
| H  | 0.43140841  | 4.93012603  | -1.11066575 |
| C  | -4.25958860 | -2.13845073 | 0.64973279  |
| C  | -5.41769188 | -1.59894440 | 0.09218785  |
| H  | -4.25948352 | -3.13910909 | 1.09235171  |
| H  | -6.34391060 | -2.18143370 | 0.09384835  |
| C  | -5.41999661 | -0.29995780 | -0.47234041 |
| C  | -4.27150501 | 0.49955241  | -0.49768543 |
| H  | -6.34955453 | 0.09522866  | -0.89399860 |
| H  | -4.27488721 | 1.50778072  | -0.91377772 |
| O  | 1.92308419  | 0.68363079  | 1.73031031  |
| C  | 1.28408898  | 0.92608006  | 2.82156914  |
| O  | 0.05503955  | 0.69148831  | 2.98989288  |
| C  | 2.08897296  | 1.49429087  | 3.96976166  |
| H  | 2.43604339  | 0.65450426  | 4.59806968  |
| H  | 2.96794996  | 2.04015874  | 3.59752615  |
| H  | 1.45280978  | 2.14249025  | 4.59035196  |
| H  | -0.40586127 | 0.02668924  | 1.86567601  |

#### Intermediate A

Lowest frequency = 13.70 cm<sup>-1</sup>

E(PBE0-D3(BJ)/def2-TZVP+SMD(1,4-dioxane)) = -1355.121477 E<sub>h</sub>

E(PW6B95-D3(BJ)/def2-TZVP+SMD(1,4-dioxane)) = -1358.195574 E<sub>h</sub>

G<sub>corr</sub> (298.15) = 0.395849 E<sub>h</sub>

Charge = 1, Multiplicity = 1

|   |            |            |             |
|---|------------|------------|-------------|
| C | 0.43887170 | 2.30011310 | -1.95540058 |
|---|------------|------------|-------------|

|    |             |             |             |
|----|-------------|-------------|-------------|
| C  | -0.37598799 | 3.38354718  | -1.37857268 |
| C  | -0.44887128 | 1.30105127  | -2.48247705 |
| C  | -1.73918449 | 3.00948490  | -1.48949356 |
| C  | -1.80248330 | 1.67416749  | -2.10411982 |
| C  | 0.18716486  | 4.63313353  | -0.77452522 |
| H  | 0.98357071  | 4.39353408  | -0.05000405 |
| H  | 0.62820169  | 5.27384665  | -1.55970439 |
| H  | -0.58682735 | 5.21683825  | -0.25348939 |
| C  | -2.93605204 | 3.81478062  | -1.08528593 |
| H  | -2.68105661 | 4.59123798  | -0.34711358 |
| H  | -3.35164662 | 4.32475546  | -1.97414969 |
| H  | -3.73625363 | 3.17920433  | -0.67320371 |
| C  | -3.05543486 | 0.94360721  | -2.48500530 |
| H  | -2.87891216 | -0.14150440 | -2.54288988 |
| H  | -3.86075470 | 1.12189717  | -1.75500030 |
| H  | -3.41438211 | 1.28587390  | -3.47363366 |
| C  | -0.07124499 | 0.12336926  | -3.32589206 |
| H  | -0.72358003 | -0.74166353 | -3.13717778 |
| H  | -0.17295195 | 0.40476801  | -4.39061772 |
| H  | 0.97336709  | -0.17990642 | -3.16001296 |
| C  | 1.93196562  | 2.33378585  | -2.08649835 |
| H  | 2.22273087  | 2.93415992  | -2.96869456 |
| H  | 2.39790670  | 2.79597810  | -1.20175728 |
| H  | 2.34932171  | 1.32282494  | -2.21240247 |
| Rh | -0.67572361 | 1.42090953  | -0.32514464 |
| C  | 0.18020918  | -1.67519339 | -0.51451856 |
| C  | -0.32241224 | -2.88031571 | 0.12011172  |
| H  | 0.98749219  | -1.63956019 | -1.24649198 |
| C  | -1.36921681 | -2.49551678 | 1.00576476  |
| C  | -0.52443454 | -0.58468096 | -0.03868092 |
| N  | -1.47601997 | -1.09161055 | 0.90048045  |
| C  | -2.25821706 | -0.20515948 | 1.58568008  |
| N  | -2.05711893 | 1.10397131  | 1.22483870  |
| C  | -2.72946148 | 2.04768217  | 1.91167252  |
| C  | -3.80355465 | 0.33487433  | 3.17484267  |
| H  | -2.52664114 | 3.08558048  | 1.63458121  |
| H  | -4.51156962 | -0.01495477 | 3.93623509  |
| N  | -3.11941894 | -0.61228246 | 2.52428033  |
| C  | -3.63294489 | 1.70600918  | 2.91812548  |
| H  | -4.18005782 | 2.47232136  | 3.47148030  |
| C  | 0.02192499  | -4.24037839 | 0.01146135  |
| C  | -0.68327438 | -5.17229989 | 0.78148205  |
| H  | 0.82338803  | -4.56028825 | -0.66156785 |
| H  | -0.43031647 | -6.23463697 | 0.70940035  |
| C  | -1.71630727 | -4.76596601 | 1.65204911  |
| C  | -2.07968517 | -3.41762300 | 1.78266991  |
| H  | -2.24887507 | -5.51878387 | 2.24150563  |
| H  | -2.87485317 | -3.09401068 | 2.45514092  |
| O  | 0.71334384  | 1.95415039  | 1.25608689  |
| C  | 1.58257043  | 1.27094578  | 1.84042452  |
| O  | 1.76262400  | -0.01203843 | 1.63638099  |

|   |            |             |            |
|---|------------|-------------|------------|
| C | 2.50897472 | 1.88532583  | 2.84978613 |
| H | 3.55356064 | 1.67102375  | 2.56813600 |
| H | 2.33998749 | 2.96793639  | 2.91490329 |
| H | 2.33450796 | 1.41411866  | 3.83249979 |
| H | 1.08863602 | -0.35537776 | 0.96239124 |

**Intermediate B**

Lowest frequency = 12.05 cm<sup>-1</sup>

E(PBE0-D3(BJ)/def2-TZVP+SMD(1,4-dioxane)) = -1552.180671 E<sub>h</sub>

E(PW6B95-D3(BJ)/def2-TZVP+SMD(1,4-dioxane)) = -1555.810047 E<sub>h</sub>

G<sub>corr</sub> (298.15) = 0.523600 E<sub>h</sub>

Charge = 1, Multiplicity = 1

|    |             |             |             |
|----|-------------|-------------|-------------|
| C  | -0.86261491 | -2.82723780 | -0.04265985 |
| C  | -1.77890500 | -2.00823529 | 0.74207213  |
| C  | 0.40681296  | -2.86940249 | 0.63632249  |
| C  | -1.05934808 | -1.54620058 | 1.89569604  |
| C  | 0.29898793  | -2.03984327 | 1.82758695  |
| C  | -1.11942666 | -0.28587629 | -1.83000589 |
| C  | -3.24154620 | -1.81533363 | 0.46792631  |
| H  | -3.45839467 | -1.82722270 | -0.61193158 |
| H  | -3.82839556 | -2.62940878 | 0.93208445  |
| H  | -3.61256735 | -0.86339930 | 0.88035612  |
| C  | -1.61405272 | -0.71772529 | 3.01396240  |
| H  | -2.53765386 | -0.19481080 | 2.72215883  |
| H  | -1.86373458 | -1.37534861 | 3.86701760  |
| H  | -0.88353000 | 0.02418940  | 3.37399196  |
| C  | 1.36048177  | -1.85855732 | 2.87115834  |
| H  | 2.36205553  | -1.83294316 | 2.41411088  |
| H  | 1.21707456  | -0.92087797 | 3.43033372  |
| H  | 1.32906041  | -2.69320774 | 3.59555704  |
| C  | 1.55342184  | -3.76236160 | 0.27365978  |
| H  | 2.48205738  | -3.45035085 | 0.77178978  |
| H  | 1.32545750  | -4.79513511 | 0.59692537  |
| H  | 1.72386477  | -3.78594672 | -0.81432199 |
| C  | -1.21047719 | -3.63384127 | -1.25734125 |
| H  | -1.44398210 | -4.67061073 | -0.95192306 |
| H  | -2.09389207 | -3.23780219 | -1.78135860 |
| H  | -0.37132816 | -3.67346079 | -1.96877375 |
| Rh | 0.00475115  | -0.79492757 | 0.02557565  |
| C  | 0.24373586  | -0.48825758 | -2.10703786 |
| C  | 1.05335231  | -1.30186853 | -3.04534293 |
| C  | 1.26194086  | 0.21254306  | -2.92759002 |
| H  | 0.55536276  | -1.70669632 | -3.93524306 |
| H  | 1.86497488  | -1.91968480 | -2.64431028 |
| H  | 2.20636892  | 0.53647225  | -2.47761645 |
| H  | 0.88880733  | 0.85255605  | -3.73574372 |
| C  | 3.18916931  | -0.88342768 | -0.34654708 |
| C  | 4.22663340  | 0.13113428  | -0.24138638 |

|   |             |             |             |
|---|-------------|-------------|-------------|
| H | 3.35873314  | -1.92018717 | -0.63083100 |
| C | 3.60085907  | 1.35781040  | 0.11798117  |
| C | 1.97880440  | -0.30438416 | -0.05654751 |
| N | 2.21958346  | 1.07069896  | 0.22647079  |
| C | 1.16986267  | 1.87119555  | 0.55273443  |
| N | -0.04167191 | 1.22168771  | 0.55501684  |
| C | -1.12298397 | 1.92647824  | 0.94377057  |
| C | 0.25138758  | 3.85371604  | 1.21705424  |
| H | -2.07401696 | 1.38936964  | 0.95021170  |
| H | 0.40575039  | 4.91365266  | 1.45401147  |
| N | 1.33629860  | 3.16535145  | 0.85266134  |
| C | -1.02524166 | 3.26982348  | 1.30082007  |
| H | -1.90489967 | 3.83649784  | 1.61307344  |
| C | 5.62110960  | 0.10360805  | -0.42201110 |
| C | 6.34460435  | 1.28960457  | -0.24236937 |
| H | 6.12912437  | -0.82542763 | -0.69893808 |
| H | 7.43017691  | 1.28524363  | -0.38205663 |
| C | 5.69992343  | 2.49115742  | 0.11577328  |
| C | 4.31070824  | 2.54824830  | 0.30531015  |
| H | 6.29271066  | 3.40135902  | 0.24930900  |
| H | 3.80119079  | 3.47165746  | 0.58303410  |
| C | -1.81683324 | 1.05129432  | -1.98122736 |
| H | -2.61986330 | 1.15769975  | -1.23038252 |
| H | -1.10242917 | 1.87757781  | -1.84575652 |
| C | -2.42577769 | 1.10750208  | -3.37580942 |
| C | -3.59659202 | 0.38166793  | -3.67022329 |
| C | -1.80860454 | 1.84551976  | -4.40279917 |
| C | -4.13830783 | 0.39225234  | -4.96189898 |
| H | -4.09758824 | -0.18718737 | -2.87708561 |
| C | -2.35033518 | 1.85878515  | -5.69595342 |
| H | -0.90804148 | 2.43031711  | -4.18405071 |
| C | -3.51345947 | 1.12907257  | -5.97942792 |
| H | -5.05368045 | -0.16960910 | -5.17421219 |
| H | -1.86493620 | 2.44553624  | -6.48250326 |
| H | -3.93695613 | 1.14022371  | -6.98867818 |
| H | -1.78747171 | -1.14583871 | -1.95928747 |

### Transition State **TS(B-C)**

Lowest frequency = -293.24 cm<sup>-1</sup>

E(PBE0-D3(BJ)/def2-TZVP+SMD(1,4-dioxane)) = -1552.160947 E<sub>h</sub>

E(PW6B95-D3(BJ)/def2-TZVP+SMD(1,4-dioxane)) = -1555.788050 E<sub>h</sub>

G<sub>corr</sub> (298.15) = 0.526159 E<sub>h</sub>

Charge = 1, Multiplicity = 1

|   |             |             |            |
|---|-------------|-------------|------------|
| C | -1.81916643 | -2.34297319 | 0.37400538 |
| C | -1.85551766 | -1.49316645 | 1.52971916 |
| C | -0.49213521 | -2.91848698 | 0.27628577 |
| C | -0.55385545 | -1.61535045 | 2.20213987 |
| C | 0.26481331  | -2.51641130 | 1.45565267 |



|    |             |             |             |
|----|-------------|-------------|-------------|
| C  | -1.11724865 | 0.03524323  | -1.62756923 |
| C  | -3.06260714 | -0.77364131 | 2.05964128  |
| H  | -3.63708796 | -0.29261117 | 1.25197834  |
| H  | -3.73166945 | -1.48415320 | 2.57993482  |
| H  | -2.78352246 | -0.00182256 | 2.79421986  |
| C  | -0.18945519 | -0.95105245 | 3.49540913  |
| H  | -0.65150938 | 0.04495547  | 3.58686751  |
| H  | -0.55253510 | -1.55943587 | 4.34421705  |
| H  | 0.90043685  | -0.83763294 | 3.60034320  |
| C  | 1.64257149  | -2.98463576 | 1.80866345  |
| H  | 2.08861030  | -2.36493760 | 2.60113667  |
| H  | 1.60650349  | -4.02839532 | 2.17011198  |
| H  | 2.31509887  | -2.95069738 | 0.93566707  |
| C  | -0.05002295 | -3.91714943 | -0.75211768 |
| H  | 1.04745452  | -3.96447219 | -0.81847595 |
| H  | -0.41186108 | -4.92676207 | -0.48200697 |
| H  | -0.44839654 | -3.67437333 | -1.75018754 |
| C  | -2.97264588 | -2.66236411 | -0.52627097 |
| H  | -3.43277496 | -3.61403034 | -0.20111357 |
| H  | -3.74428088 | -1.88009054 | -0.48643127 |
| H  | -2.65506235 | -2.79669610 | -1.57351045 |
| Rh | -0.28409724 | -0.74634462 | 0.17374578  |
| C  | 0.24254573  | -0.25576500 | -2.02709294 |
| C  | 0.63343000  | -1.02673583 | -3.24243808 |
| C  | 1.02245688  | 0.44509812  | -3.09860274 |
| H  | -0.17902632 | -1.29301292 | -3.92923422 |
| H  | 1.45036805  | -1.75079606 | -3.20142292 |
| H  | 2.08661524  | 0.65710997  | -2.94777539 |
| H  | 0.48266743  | 1.19964997  | -3.68319488 |
| C  | 2.66915681  | -1.23718212 | -1.02857900 |
| C  | 3.88260455  | -0.46704344 | -0.93437216 |
| H  | 2.59272611  | -2.24974473 | -1.42318054 |
| C  | 3.53853921  | 0.83074378  | -0.44846257 |
| C  | 1.60031469  | -0.44727220 | -0.62614937 |
| N  | 2.14289985  | 0.81956315  | -0.23980128 |
| C  | 1.36384090  | 1.69497373  | 0.46638261  |
| N  | 0.12048220  | 1.20841080  | 0.78382753  |
| C  | -0.68127246 | 1.99610338  | 1.52748630  |
| C  | 1.02165982  | 3.66531063  | 1.56681657  |
| H  | -1.67234086 | 1.59872849  | 1.75406719  |
| H  | 1.41875053  | 4.64603503  | 1.85588869  |
| N  | 1.82530831  | 2.89771933  | 0.82062380  |
| C  | -0.26002911 | 3.25345071  | 1.96300096  |
| H  | -0.91091195 | 3.88476083  | 2.57186404  |
| C  | 5.23188326  | -0.75730861 | -1.22441683 |
| C  | 6.18936917  | 0.24068423  | -1.02155170 |
| H  | 5.51969215  | -1.74424662 | -1.59948075 |
| H  | 7.24073756  | 0.03479737  | -1.24479935 |
| C  | 5.82346495  | 1.51430358  | -0.53372890 |
| C  | 4.49039331  | 1.83359126  | -0.23560842 |
| H  | 6.59626050  | 2.27554748  | -0.38877420 |

|   |             |             |             |
|---|-------------|-------------|-------------|
| H | 4.19876246  | 2.81568011  | 0.13762696  |
| C | -1.68154902 | 1.44376113  | -1.73974380 |
| H | -0.95706385 | 2.19139406  | -1.37822309 |
| H | -1.80616995 | 1.65054148  | -2.82494791 |
| C | -3.02465520 | 1.63490848  | -1.05998002 |
| C | -3.24944249 | 2.71529699  | -0.18693721 |
| C | -4.09340223 | 0.75122092  | -1.31111776 |
| C | -4.48498503 | 2.88176687  | 0.45766358  |
| H | -2.45098395 | 3.44730625  | -0.02387902 |
| C | -5.33100419 | 0.91432287  | -0.67347949 |
| H | -3.96681681 | -0.06417686 | -2.03143577 |
| C | -5.52689063 | 1.97335110  | 0.22658035  |
| H | -4.63745057 | 3.73152614  | 1.13145438  |
| H | -6.14956382 | 0.21929682  | -0.88828983 |
| H | -6.49287496 | 2.10223426  | 0.72480829  |
| H | -1.84141113 | -0.73964895 | -1.91241947 |

### Intermediate C

Lowest frequency = 21.43 cm<sup>-1</sup>

E(PBE0-D3(BJ)/def2-TZVP+SMD(1,4-dioxane)) = -1552.182713 E<sub>h</sub>

E(PW6B95-D3(BJ)/def2-TZVP+SMD(1,4-dioxane)) = -1555.810949 E<sub>h</sub>

G<sub>corr</sub> (298.15) = 0.52463 E<sub>h</sub>

Charge = 1, Multiplicity = 1

|   |             |             |             |
|---|-------------|-------------|-------------|
| C | -1.54865874 | 1.83124687  | -0.41464605 |
| C | -1.37632841 | 1.02354975  | -1.60532703 |
| C | -0.28836288 | 2.47123185  | -0.14606793 |
| C | -0.02587646 | 1.29036089  | -2.13953441 |
| C | 0.63552888  | 2.17299960  | -1.25678811 |
| C | -0.94718526 | -0.58418620 | 1.54720605  |
| C | -2.45964374 | 0.26862444  | -2.31531667 |
| H | -3.14892933 | -0.21690808 | -1.60583774 |
| H | -3.05644166 | 0.95919547  | -2.94111499 |
| H | -2.04749233 | -0.50146873 | -2.98680983 |
| C | 0.51685878  | 0.70074568  | -3.40594631 |
| H | 0.23760103  | -0.36168702 | -3.51144548 |
| H | 0.10757362  | 1.23286952  | -4.28448612 |
| H | 1.61465845  | 0.77206451  | -3.44672754 |
| C | 2.01549014  | 2.73713642  | -1.40276024 |
| H | 2.54555500  | 2.77022037  | -0.43779750 |
| H | 2.62477594  | 2.14070876  | -2.09941366 |
| H | 1.96796966  | 3.77121361  | -1.79252302 |
| C | -0.02015572 | 3.45846519  | 0.95174927  |
| H | 1.05463671  | 3.52270812  | 1.18088771  |
| H | -0.35589449 | 4.46558131  | 0.64048276  |
| H | -0.56055357 | 3.19723031  | 1.87548563  |
| C | -2.81951677 | 2.00669590  | 0.36015276  |
| H | -3.41761295 | 2.82431492  | -0.08298614 |
| H | -3.43764963 | 1.09514693  | 0.34383996  |

|    |             |             |             |
|----|-------------|-------------|-------------|
| H  | -2.62115452 | 2.27075142  | 1.41076439  |
| Rh | -0.02550819 | 0.31866726  | -0.09771073 |
| C  | 0.35189451  | -1.10579886 | 2.14010421  |
| C  | 0.48122847  | -1.53842308 | 3.59367058  |
| C  | 0.58895935  | -2.56195783 | 2.49546750  |
| H  | -0.44173182 | -1.52136914 | 4.18317955  |
| H  | 1.39208839  | -1.26083378 | 4.13554598  |
| H  | 1.57810182  | -2.98539993 | 2.28786526  |
| H  | -0.24303054 | -3.25835512 | 2.36215993  |
| C  | 2.12605219  | 0.82590698  | 1.93538746  |
| C  | 3.41657689  | 0.92073645  | 1.32558406  |
| H  | 1.70755027  | 1.49447505  | 2.68820617  |
| C  | 3.59223689  | -0.24569969 | 0.51545807  |
| C  | 1.50728385  | -0.35318979 | 1.50771680  |
| N  | 2.43163910  | -1.01862406 | 0.63512967  |
| C  | 1.92162689  | -1.88853037 | -0.32895067 |
| N  | 0.63819667  | -1.59875063 | -0.69707444 |
| C  | 0.04632585  | -2.45352566 | -1.55876106 |
| C  | 2.09586336  | -3.66954415 | -1.73298653 |
| H  | -0.99492581 | -2.24171665 | -1.81583491 |
| H  | 2.72882111  | -4.45696606 | -2.15853014 |
| N  | 2.67420135  | -2.85966210 | -0.82865178 |
| C  | 0.75140463  | -3.52895770 | -2.10502675 |
| H  | 0.27383657  | -4.21403121 | -2.80956960 |
| C  | 4.44615804  | 1.88980641  | 1.37877546  |
| C  | 5.59458033  | 1.68102720  | 0.61731933  |
| H  | 4.33963267  | 2.77946963  | 2.00712576  |
| H  | 6.40769972  | 2.41233291  | 0.64772814  |
| C  | 5.73245316  | 0.52862465  | -0.19606279 |
| C  | 4.73717954  | -0.45250030 | -0.26486614 |
| H  | 6.65095461  | 0.39412369  | -0.77599516 |
| H  | 4.85098168  | -1.35347153 | -0.87147416 |
| C  | -2.07372284 | -1.56912369 | 1.24523490  |
| H  | -2.82256862 | -1.05895802 | 0.60936278  |
| H  | -1.68971223 | -2.42038397 | 0.65694400  |
| C  | -2.77368778 | -2.10578166 | 2.48906116  |
| C  | -3.33452772 | -1.22619493 | 3.43628582  |
| C  | -2.87527298 | -3.49010739 | 2.71953784  |
| C  | -3.96907111 | -1.71718090 | 4.58490711  |
| H  | -3.28022276 | -0.14356795 | 3.27274317  |
| C  | -3.50783854 | -3.98623237 | 3.86872401  |
| H  | -2.45935473 | -4.19096618 | 1.98525219  |
| C  | -4.05325188 | -3.10006406 | 4.80755248  |
| H  | -4.40221404 | -1.01849200 | 5.30834439  |
| H  | -3.57568300 | -5.06722035 | 4.02908117  |
| H  | -4.54634258 | -3.48402015 | 5.70622351  |
| H  | -1.32593186 | 0.26176710  | 2.14799440  |

Transition State **TS(C-D)**

Lowest frequency = -88.48 cm<sup>-1</sup>

E(PBE0-D3(BJ)/def2-TZVP+SMD(1,4-dioxane)) = -1552.174457 E<sub>h</sub>

E(PW6B95-D3(BJ)/def2-TZVP+SMD(1,4-dioxane)) = -1555.802544 E<sub>h</sub>

G<sub>corr</sub> (298.15) = 0.527509 E<sub>h</sub>

Charge = 1, Multiplicity = 1

|    |             |             |             |
|----|-------------|-------------|-------------|
| C  | -1.75979669 | 0.87314301  | -2.00376748 |
| C  | -1.49877589 | -0.51956929 | -2.42797641 |
| C  | -0.49826411 | 1.52378312  | -1.89419648 |
| C  | -0.09878399 | -0.69291075 | -2.65956596 |
| C  | 0.53934941  | 0.53363033  | -2.25426727 |
| C  | -0.96477651 | 0.81223339  | 1.31860845  |
| C  | -2.56712203 | -1.54007578 | -2.64878885 |
| H  | -3.39918022 | -1.40266009 | -1.94142507 |
| H  | -2.97524576 | -1.42314050 | -3.67128325 |
| H  | -2.17802624 | -2.56660925 | -2.56013067 |
| C  | 0.59618434  | -1.93864531 | -3.12348188 |
| H  | 0.00648668  | -2.83964614 | -2.88973432 |
| H  | 0.75224717  | -1.91778307 | -4.21764321 |
| H  | 1.58600939  | -2.04531691 | -2.64992756 |
| C  | 1.99656244  | 0.83365955  | -2.34050253 |
| H  | 2.31347246  | 1.55562989  | -1.57364235 |
| H  | 2.61610092  | -0.07047444 | -2.24954216 |
| H  | 2.20339780  | 1.28539801  | -3.33038700 |
| C  | -0.23529393 | 2.95708422  | -1.55424001 |
| H  | 0.66754589  | 3.05516711  | -0.93041508 |
| H  | -0.07609325 | 3.54036147  | -2.48032264 |
| H  | -1.08427507 | 3.40236821  | -1.01365513 |
| C  | -3.11238272 | 1.49348424  | -1.86390209 |
| H  | -3.46286296 | 1.83125630  | -2.85787622 |
| H  | -3.85065484 | 0.78073678  | -1.46824311 |
| H  | -3.08860734 | 2.36713243  | -1.19653347 |
| Rh | -0.53969231 | -0.10271158 | -0.50757151 |
| C  | 0.33867064  | 0.85162548  | 2.13179118  |
| C  | 0.33080077  | 1.55382829  | 3.48473120  |
| C  | 0.49497433  | 0.06072801  | 3.42978724  |
| H  | -0.63388744 | 1.94952713  | 3.82239612  |
| H  | 1.19555180  | 2.16574352  | 3.75977222  |
| H  | 1.48766213  | -0.34938572 | 3.64772792  |
| H  | -0.33350916 | -0.56878292 | 3.76671404  |
| C  | 2.42463271  | 2.07360319  | 1.16659573  |
| C  | 3.66971202  | 1.63339644  | 0.58420716  |
| H  | 2.18180163  | 3.08696933  | 1.48760363  |
| C  | 3.59556255  | 0.21624204  | 0.44786758  |
| C  | 1.60628775  | 0.98245176  | 1.34995404  |
| N  | 2.31195570  | -0.17333556 | 0.88761723  |
| C  | 1.80629420  | -1.46502243 | 0.87302171  |
| N  | 0.48642212  | -1.62095223 | 0.55477260  |
| C  | -0.03617302 | -2.86319154 | 0.68498044  |
| C  | 2.12672596  | -3.70998398 | 1.19676154  |
| H  | -1.10391383 | -2.96382352 | 0.46699806  |

|   |             |             |             |
|---|-------------|-------------|-------------|
| H | 2.83450129  | -4.52408215 | 1.39556621  |
| N | 2.63860341  | -2.47607256 | 1.13976051  |
| C | 0.75421170  | -3.95702309 | 1.02926699  |
| H | 0.32644821  | -4.95756184 | 1.12454637  |
| C | 4.83001578  | 2.30859550  | 0.15511059  |
| C | 5.87569564  | 1.56263882  | -0.39550518 |
| H | 4.90662116  | 3.39593370  | 0.25293262  |
| H | 6.78686829  | 2.06933306  | -0.72801851 |
| C | 5.77931444  | 0.15903204  | -0.52232497 |
| C | 4.63891017  | -0.53881359 | -0.10400568 |
| H | 6.61989423  | -0.40096810 | -0.94385555 |
| H | 4.57794221  | -1.62596003 | -0.17524250 |
| C | -2.10576400 | 0.05639904  | 2.02573676  |
| H | -1.82837627 | -1.00487985 | 2.15957024  |
| H | -2.21861977 | 0.46620144  | 3.05172650  |
| C | -3.45437185 | 0.13287066  | 1.34389565  |
| C | -4.00014136 | -0.99025441 | 0.69518367  |
| C | -4.21253414 | 1.31940174  | 1.37794085  |
| C | -5.26591490 | -0.93382375 | 0.09042103  |
| H | -3.43856533 | -1.93270375 | 0.68984378  |
| C | -5.47645574 | 1.38268737  | 0.77611945  |
| H | -3.81429808 | 2.19903499  | 1.89696966  |
| C | -6.00688994 | 0.25650454  | 0.12679902  |
| H | -5.68119633 | -1.82397707 | -0.39412627 |
| H | -6.05565367 | 2.31069660  | 0.82186138  |
| H | -6.99869029 | 0.30232285  | -0.33390682 |
| H | -1.28209834 | 1.84698058  | 1.09310285  |

#### Intermediate **D**

Lowest frequency = 13.62 cm<sup>-1</sup>

E(PBE0-D3(BJ)/def2-TZVP+SMD(1,4-dioxane)) = -1552.184129 E<sub>h</sub>

E(PW6B95-D3(BJ)/def2-TZVP+SMD(1,4-dioxane)) = -1555.810504 E<sub>h</sub>

G<sub>corr</sub> (298.15) = 0.525620 E<sub>h</sub>

Charge = 1, Multiplicity = 1

|   |             |             |             |
|---|-------------|-------------|-------------|
| C | -1.52064069 | -1.79061939 | 1.43724440  |
| C | -2.67609492 | -1.36830571 | 0.63125432  |
| C | -0.92473565 | -0.61054324 | 2.02150246  |
| C | -2.74279005 | 0.04793589  | 0.65108526  |
| C | -1.62573206 | 0.52870535  | 1.48090883  |
| C | 1.22855534  | -1.16417626 | -0.41956531 |
| C | -3.61677667 | -2.30997661 | -0.05813851 |
| H | -3.08444994 | -3.18725704 | -0.45895636 |
| H | -4.36656622 | -2.68228127 | 0.66461434  |
| H | -4.15781710 | -1.81763507 | -0.88119895 |
| C | -3.76930167 | 0.92716481  | 0.00068290  |
| H | -4.27638147 | 0.41130619  | -0.83011568 |
| H | -4.54262734 | 1.22766831  | 0.73197789  |
| H | -3.31668657 | 1.85201232  | -0.39373415 |

|    |             |             |             |
|----|-------------|-------------|-------------|
| C  | -1.41077751 | 1.95843033  | 1.86906326  |
| H  | -0.39718040 | 2.13332915  | 2.25594282  |
| H  | -1.58500644 | 2.64624747  | 1.02635021  |
| H  | -2.13099944 | 2.22905569  | 2.66406379  |
| C  | 0.19526969  | -0.56826492 | 3.01646926  |
| H  | 0.82360986  | 0.32530728  | 2.87676355  |
| H  | -0.21445961 | -0.54509502 | 4.04331980  |
| H  | 0.83975789  | -1.45756066 | 2.93501180  |
| C  | -1.16517822 | -3.21203009 | 1.75692270  |
| H  | -1.75998451 | -3.56085136 | 2.62185343  |
| H  | -1.37099926 | -3.88436335 | 0.90992376  |
| H  | -0.10042317 | -3.31323961 | 2.01751173  |
| Rh | -0.73540612 | -0.55839402 | -0.16034100 |
| C  | 2.22054697  | -0.08356786 | -0.77879354 |
| C  | 3.59470513  | -0.49219495 | -1.29781328 |
| C  | 2.62903091  | 0.20537150  | -2.21549574 |
| H  | 3.75727683  | -1.56470090 | -1.45245830 |
| H  | 4.46962636  | 0.06010138  | -0.94023807 |
| H  | 2.83147209  | 1.25116122  | -2.47247349 |
| H  | 2.16889277  | -0.36963671 | -3.02623703 |
| C  | 2.94350254  | 1.39448960  | 1.22689607  |
| C  | 2.56756863  | 2.70428634  | 1.70585904  |
| H  | 3.74673311  | 0.76655750  | 1.61295711  |
| C  | 1.54878010  | 3.19562757  | 0.84126388  |
| C  | 2.16252912  | 1.08278114  | 0.14281272  |
| N  | 1.26923291  | 2.16779616  | -0.09615031 |
| C  | 0.31962955  | 2.23680758  | -1.10241678 |
| N  | -0.37170391 | 1.10698591  | -1.45152412 |
| C  | -1.15777807 | 1.19431003  | -2.55366571 |
| C  | -0.72397414 | 3.52263665  | -2.69729889 |
| H  | -1.66960530 | 0.27278788  | -2.84688852 |
| H  | -0.88880870 | 4.52473908  | -3.11270845 |
| N  | 0.11375620  | 3.43675923  | -1.66328590 |
| C  | -1.35178944 | 2.38904987  | -3.23952162 |
| H  | -1.99509741 | 2.43984426  | -4.12078178 |
| C  | 3.00535932  | 3.49777715  | 2.78431702  |
| C  | 2.42189659  | 4.75362266  | 2.97458137  |
| H  | 3.78817651  | 3.13405025  | 3.45708765  |
| H  | 2.75241457  | 5.38576208  | 3.80449054  |
| C  | 1.41545964  | 5.22347814  | 2.10382531  |
| C  | 0.96359985  | 4.45579114  | 1.02225659  |
| H  | 0.98425952  | 6.21628594  | 2.26592067  |
| H  | 0.20559736  | 4.83471424  | 0.33581910  |
| C  | 0.53909906  | -1.96977916 | -1.46597385 |
| H  | -0.61460385 | -1.57428281 | -1.61032636 |
| H  | 0.86260004  | -1.70466511 | -2.48965854 |
| C  | 0.39442544  | -3.46373721 | -1.28258371 |
| C  | -0.71544621 | -4.13658496 | -1.83022746 |
| C  | 1.36399214  | -4.20699647 | -0.58660456 |
| C  | -0.86429076 | -5.51971407 | -1.67046138 |
| H  | -1.47235674 | -3.56884470 | -2.38519948 |

|   |             |             |             |
|---|-------------|-------------|-------------|
| C | 1.21661079  | -5.59273860 | -0.42635084 |
| H | 2.24321217  | -3.70441194 | -0.17110567 |
| C | 0.10081716  | -6.25125632 | -0.96056052 |
| H | -1.73338838 | -6.02818799 | -2.10001682 |
| H | 1.97954198  | -6.15913780 | 0.11714357  |
| H | -0.01411541 | -7.33196874 | -0.83163138 |
| H | 1.53348717  | -1.72300240 | 0.47669194  |

Transition State **TS(D-E)**

Lowest frequency = -616.27 cm<sup>-1</sup>

E(PBE0-D3(BJ)/def2-TZVP+SMD(1,4-dioxane)) = -1552.179995 E<sub>h</sub>

E(PW6B95-D3(BJ)/def2-TZVP+SMD(1,4-dioxane)) = -1555.806341 E<sub>h</sub>

G<sub>corr</sub> (298.15) = 0.523113 E<sub>h</sub>

Charge = 1, Multiplicity = 1

|    |             |             |             |
|----|-------------|-------------|-------------|
| C  | 1.36690875  | 0.45730283  | -2.15056956 |
| C  | 1.92995991  | 1.66038511  | -1.55016641 |
| C  | -0.07525264 | 0.57677169  | -2.14243239 |
| C  | 0.84601239  | 2.51565190  | -1.14482818 |
| C  | -0.38705960 | 1.82698982  | -1.49261834 |
| C  | 0.83868851  | -1.46647929 | 0.48538445  |
| C  | 3.39373651  | 1.96861143  | -1.45986793 |
| H  | 3.98779495  | 1.05963702  | -1.27853573 |
| H  | 3.73748262  | 2.41272971  | -2.41250693 |
| H  | 3.60774344  | 2.68755765  | -0.65399187 |
| C  | 0.94802165  | 3.90041828  | -0.57395191 |
| H  | 1.90342898  | 4.04800773  | -0.04601358 |
| H  | 0.88699261  | 4.65908574  | -1.37656231 |
| H  | 0.12974482  | 4.10665506  | 0.13548323  |
| C  | -1.76124887 | 2.38901413  | -1.29099513 |
| H  | -2.53232981 | 1.60486386  | -1.30806214 |
| H  | -1.83988051 | 2.94717180  | -0.34404691 |
| H  | -1.98596792 | 3.09879070  | -2.10854348 |
| C  | -1.04961238 | -0.36973935 | -2.77623851 |
| H  | -2.04927499 | -0.28669957 | -2.32395208 |
| H  | -1.14635340 | -0.14818659 | -3.85566927 |
| H  | -0.72210332 | -1.41599441 | -2.67452488 |
| C  | 2.15248291  | -0.63021300 | -2.81837304 |
| H  | 2.32917641  | -0.36201753 | -3.87675827 |
| H  | 3.13229710  | -0.77870791 | -2.33982502 |
| H  | 1.60880919  | -1.58834653 | -2.80741627 |
| Rh | 0.73514687  | 0.57540564  | -0.06002455 |
| C  | -0.36355629 | -1.99214906 | 1.22533277  |
| C  | -0.22083946 | -3.30740870 | 1.98513416  |
| C  | -0.42109200 | -2.02561180 | 2.74491497  |
| H  | 0.77848467  | -3.75560331 | 1.99773294  |
| H  | -1.04868432 | -4.02204248 | 1.93772137  |
| H  | -1.39910698 | -1.85212045 | 3.20733506  |
| H  | 0.42068684  | -1.61959043 | 3.31556536  |

|   |             |             |             |
|---|-------------|-------------|-------------|
| C | -2.36803255 | -2.61101932 | -0.29557958 |
| C | -3.58141158 | -1.94084421 | -0.69797824 |
| H | -2.07703037 | -3.63259670 | -0.54091374 |
| C | -3.58014550 | -0.65693539 | -0.08245162 |
| C | -1.64067194 | -1.76284738 | 0.50008225  |
| N | -2.35923251 | -0.53749647 | 0.62904827  |
| C | -1.99897309 | 0.53797662  | 1.42641169  |
| N | -0.68201016 | 0.90642175  | 1.49902614  |
| C | -0.36627323 | 1.85024159  | 2.42111705  |
| C | -2.66820976 | 2.15781124  | 2.91360484  |
| H | 0.69480334  | 2.10273412  | 2.49611115  |
| H | -3.50409040 | 2.67726316  | 3.39872546  |
| N | -2.98631526 | 1.17634326  | 2.06832601  |
| C | -1.33284712 | 2.49941874  | 3.18302211  |
| H | -1.05880750 | 3.26265442  | 3.91480355  |
| C | -4.65560180 | -2.31070438 | -1.53016016 |
| C | -5.69669437 | -1.39928626 | -1.72913436 |
| H | -4.67002018 | -3.29361578 | -2.01110293 |
| H | -6.54111900 | -1.67101652 | -2.36994252 |
| C | -5.67869283 | -0.13261737 | -1.10727960 |
| C | -4.62430740 | 0.25935884  | -0.27138312 |
| H | -6.51262585 | 0.55777504  | -1.26760953 |
| H | -4.63324303 | 1.22593805  | 0.23373293  |
| C | 1.97014312  | -0.85682552 | 1.15093888  |
| H | 1.87173690  | 0.65084276  | 1.10633691  |
| H | 1.86729337  | -0.76161024 | 2.24314985  |
| C | 3.38912360  | -1.07785096 | 0.71473347  |
| C | 4.40097765  | -0.20304049 | 1.16162028  |
| C | 3.74913878  | -2.17209499 | -0.09446057 |
| C | 5.73562225  | -0.40373860 | 0.79414383  |
| H | 4.13365979  | 0.65106996  | 1.79566681  |
| C | 5.08675422  | -2.37242880 | -0.46614164 |
| H | 2.98551307  | -2.88350888 | -0.42243047 |
| C | 6.08192987  | -1.48827629 | -0.02785117 |
| H | 6.50848834  | 0.28552716  | 1.14875483  |
| H | 5.35174504  | -3.23074741 | -1.09169886 |
| H | 7.12551035  | -1.64795138 | -0.31636759 |
| H | 1.04361908  | -2.01652804 | -0.44201124 |

#### Intermediate E

Lowest frequency = 14.26 cm<sup>-1</sup>

E(PBE0-D3(BJ)/def2-TZVP+SMD(1,4-dioxane)) = -1552.183199 E<sub>h</sub>

E(PW6B95-D3(BJ)/def2-TZVP+SMD(1,4-dioxane)) = -1555.811109 E<sub>h</sub>

G<sub>corr</sub> (298.15) = 0.525118 E<sub>h</sub>

Charge = 1, Multiplicity = 1

|   |             |            |             |
|---|-------------|------------|-------------|
| C | 1.38267970  | 0.40461976 | -2.09401711 |
| C | 1.95290518  | 1.60788211 | -1.52293496 |
| C | -0.06273182 | 0.52240847 | -2.08769482 |



|    |             |             |             |
|----|-------------|-------------|-------------|
| C  | 0.84829435  | 2.47133631  | -1.13701123 |
| C  | -0.37998622 | 1.79467488  | -1.50147761 |
| C  | 0.84769749  | -1.51138304 | 0.48104404  |
| C  | 3.41327309  | 1.94396970  | -1.48445721 |
| H  | 4.02596162  | 1.05101628  | -1.28713183 |
| H  | 3.72380138  | 2.36394068  | -2.45919960 |
| H  | 3.63537144  | 2.68841708  | -0.70491778 |
| C  | 0.94766304  | 3.87698638  | -0.61813229 |
| H  | 1.90472727  | 4.04772499  | -0.10202222 |
| H  | 0.87831522  | 4.59779388  | -1.45397053 |
| H  | 0.13139637  | 4.10656120  | 0.08570084  |
| C  | -1.75104128 | 2.37232859  | -1.33289660 |
| H  | -2.53048146 | 1.59816114  | -1.37943977 |
| H  | -1.84834223 | 2.92050243  | -0.38169699 |
| H  | -1.94479548 | 3.09570854  | -2.14654119 |
| C  | -1.02221323 | -0.43643721 | -2.72475042 |
| H  | -2.03856547 | -0.32670549 | -2.31829761 |
| H  | -1.07135262 | -0.25285608 | -3.81456007 |
| H  | -0.71168184 | -1.48191498 | -2.57465917 |
| C  | 2.15720554  | -0.69079507 | -2.75692660 |
| H  | 2.27243984  | -0.44674421 | -3.82982138 |
| H  | 3.16203713  | -0.80197200 | -2.32470949 |
| H  | 1.63550796  | -1.65922523 | -2.69636089 |
| Rh | 0.80893366  | 0.62055201  | 0.03748357  |
| C  | -0.37493967 | -2.00826376 | 1.19750845  |
| C  | -0.24437815 | -3.33732003 | 1.93922906  |
| C  | -0.43154807 | -2.06517565 | 2.71653965  |
| H  | 0.75024735  | -3.79535054 | 1.94444375  |
| H  | -1.08044783 | -4.04093970 | 1.87592215  |
| H  | -1.40799799 | -1.88952397 | 3.18128216  |
| H  | 0.41664597  | -1.67427150 | 3.28690495  |
| C  | -2.39031541 | -2.60300373 | -0.31650153 |
| C  | -3.59166561 | -1.91399631 | -0.72208959 |
| H  | -2.11739844 | -3.63089792 | -0.55622394 |
| C  | -3.56468878 | -0.62486187 | -0.11836905 |
| C  | -1.64567294 | -1.76140467 | 0.46986584  |
| N  | -2.33906552 | -0.52032970 | 0.58805335  |
| C  | -1.98598832 | 0.52430140  | 1.43010619  |
| N  | -0.66638128 | 0.87114766  | 1.56341387  |
| C  | -0.37513668 | 1.73671005  | 2.57027098  |
| C  | -2.68855603 | 2.06495799  | 2.98696724  |
| H  | 0.68514434  | 1.96021530  | 2.70611015  |
| H  | -3.53480446 | 2.57642903  | 3.46235481  |
| N  | -2.98543897 | 1.14654310  | 2.06717690  |
| C  | -1.35966428 | 2.34605418  | 3.34100339  |
| H  | -1.09898252 | 3.04352334  | 4.14023538  |
| C  | -4.67444224 | -2.27235356 | -1.54831672 |
| C  | -5.70027653 | -1.34500069 | -1.75152151 |
| H  | -4.70748561 | -3.25912834 | -2.02029200 |
| H  | -6.55146139 | -1.60734022 | -2.38724870 |
| C  | -5.65858280 | -0.07395144 | -1.13954760 |

|   |             |             |             |
|---|-------------|-------------|-------------|
| C | -4.59473285 | 0.30691293  | -0.31083987 |
| H | -6.48142432 | 0.62906379  | -1.30224935 |
| H | -4.58635983 | 1.27761178  | 0.18617854  |
| C | 1.96142929  | -0.92261636 | 1.12445240  |
| H | 1.77047649  | 1.31966681  | 1.07567870  |
| H | 1.84165338  | -0.67580693 | 2.18600404  |
| C | 3.37514944  | -1.06292579 | 0.69079524  |
| C | 4.35265992  | -0.17682320 | 1.19425704  |
| C | 3.78891778  | -2.10088666 | -0.16986855 |
| C | 5.69538093  | -0.30412172 | 0.82557523  |
| H | 4.04532657  | 0.62921309  | 1.87034747  |
| C | 5.13436435  | -2.22640147 | -0.54393504 |
| H | 3.05831275  | -2.83115633 | -0.53132695 |
| C | 6.09053119  | -1.32593923 | -0.05368627 |
| H | 6.43853482  | 0.39399491  | 1.22403926  |
| H | 5.43831331  | -3.04157919 | -1.20851435 |
| H | 7.14132706  | -1.42765919 | -0.34240675 |
| H | 1.00843799  | -1.99856380 | -0.48906249 |

### Intermediate B1

Lowest frequency = 12.32 cm<sup>-1</sup>

E(PBE0-D3(BJ)/def2-TZVP+SMD(1,4-dioxane)) = -1552.176885 E<sub>h</sub>

E(PW6B95-D3(BJ)/def2-TZVP+SMD(1,4-dioxane)) = -1555.805962 E<sub>h</sub>

G<sub>corr</sub> (298.15) = 0.523048 E<sub>h</sub>

Charge = 1, Multiplicity = 1

|   |             |             |             |
|---|-------------|-------------|-------------|
| C | -2.97910725 | -1.49766338 | 0.45316801  |
| C | -3.43828776 | -0.17051233 | 0.69961959  |
| C | -1.84182736 | -1.76175686 | 1.33670330  |
| C | -2.59221302 | 0.40036629  | 1.74962376  |
| C | -1.66348885 | -0.60518930 | 2.18509787  |
| C | -1.20890787 | -0.55942365 | -2.08103429 |
| C | -4.66192991 | 0.47109156  | 0.11377211  |
| H | -4.79989026 | 0.20370574  | -0.94630513 |
| H | -5.56282406 | 0.13206954  | 0.65802455  |
| H | -4.62909778 | 1.56843405  | 0.19982931  |
| C | -2.75402188 | 1.75980822  | 2.36056417  |
| H | -3.12659363 | 2.49424910  | 1.62901155  |
| H | -3.48439804 | 1.71556676  | 3.18958364  |
| H | -1.80144542 | 2.13005163  | 2.77005515  |
| C | -0.72957969 | -0.49134423 | 3.34953345  |
| H | 0.11228567  | -1.19292816 | 3.26704128  |
| H | -0.31765752 | 0.52449334  | 3.44602475  |
| H | -1.28266951 | -0.72909032 | 4.27737822  |
| C | -1.15629556 | -3.08493952 | 1.50838556  |
| H | -0.10337981 | -2.95896939 | 1.80473190  |
| H | -1.66218253 | -3.67021688 | 2.29841551  |
| H | -1.18634120 | -3.68333460 | 0.58454125  |
| C | -3.60085353 | -2.49426251 | -0.47635915 |

|    |             |             |             |
|----|-------------|-------------|-------------|
| H  | -4.22159337 | -3.20070807 | 0.10500103  |
| H  | -4.24684658 | -2.00780011 | -1.22150246 |
| H  | -2.84353850 | -3.08910661 | -1.01217268 |
| Rh | -1.27186135 | -0.08645541 | 0.02328428  |
| C  | -0.37864921 | -1.51189276 | -1.46877546 |
| C  | 1.72644125  | -0.23050555 | 1.09881931  |
| C  | 2.81118313  | 0.73608196  | 1.15390677  |
| H  | 1.77801347  | -1.25540516 | 1.46650178  |
| C  | 2.35149632  | 1.94039741  | 0.54941048  |
| C  | 0.64768568  | 0.35390670  | 0.48526379  |
| N  | 1.01828621  | 1.68886898  | 0.14707078  |
| C  | 0.09188833  | 2.49988394  | -0.42749096 |
| N  | -1.12834442 | 1.89594024  | -0.61883729 |
| C  | -2.10485999 | 2.63029719  | -1.18668823 |
| C  | -0.61280057 | 4.48514405  | -1.31079854 |
| H  | -3.05961853 | 2.12363792  | -1.34866683 |
| H  | -0.36735302 | 5.52106281  | -1.57569510 |
| N  | 0.36951546  | 3.76729417  | -0.76147336 |
| C  | -1.89584678 | 3.95966608  | -1.55051370 |
| H  | -2.69154010 | 4.55245392  | -2.00661433 |
| C  | 4.12387246  | 0.68385256  | 1.65601762  |
| C  | 4.93207002  | 1.82262588  | 1.54297325  |
| H  | 4.50557334  | -0.22885903 | 2.12413788  |
| H  | 5.95642304  | 1.79671347  | 1.92777535  |
| C  | 4.45095528  | 3.00318595  | 0.94132112  |
| C  | 3.14607657  | 3.08479013  | 0.43112504  |
| H  | 5.10673722  | 3.87620310  | 0.86743962  |
| H  | 2.76314255  | 3.99218085  | -0.03754416 |
| C  | -1.09783313 | 0.28312444  | -3.29492233 |
| H  | -1.20600924 | 1.37206052  | -3.23674650 |
| H  | -0.40186749 | -0.05748420 | -4.07064600 |
| C  | -2.35575802 | -0.55164943 | -3.02511897 |
| H  | -2.53845599 | -1.45328113 | -3.62330440 |
| H  | -3.26251994 | 0.01262263  | -2.77314284 |
| H  | -0.84167750 | -2.46307983 | -1.17781248 |
| C  | 1.10959395  | -1.60712610 | -1.73243135 |
| H  | 1.53448228  | -0.60945240 | -1.91939714 |
| H  | 1.62838434  | -2.03139300 | -0.85812906 |
| C  | 1.30210480  | -2.50698714 | -2.94590414 |
| C  | 1.69310828  | -1.97030543 | -4.18710395 |
| C  | 1.05993391  | -3.89220951 | -2.85409595 |
| C  | 1.83804412  | -2.79717340 | -5.31039895 |
| H  | 1.90966593  | -0.89890750 | -4.26773914 |
| C  | 1.20109830  | -4.71967534 | -3.97552075 |
| H  | 0.77299552  | -4.33099773 | -1.89052903 |
| C  | 1.58720870  | -4.17279933 | -5.20864792 |
| H  | 2.15485131  | -2.36611312 | -6.26571084 |
| H  | 1.01792803  | -5.79546829 | -3.88598693 |
| H  | 1.70161237  | -4.81899251 | -6.08473408 |

Transition State **TS(B1-C1)**

Lowest frequency = -234.82 cm<sup>-1</sup>

E(PBE0-D3(BJ)/def2-TZVP+SMD(1,4-dioxane)) = -1552.156825 E<sub>h</sub>

E(PW6B95-D3(BJ)/def2-TZVP+SMD(1,4-dioxane)) = -1555.785397 E<sub>h</sub>

G<sub>corr</sub> (298.15) = 0.525793 E<sub>h</sub>

Charge = 1, Multiplicity = 1

|    |             |             |             |
|----|-------------|-------------|-------------|
| C  | -3.27702566 | -1.43515539 | 0.65318147  |
| C  | -3.66254653 | -0.05192749 | 0.55864041  |
| C  | -2.22130695 | -1.54404488 | 1.63675992  |
| C  | -2.88097726 | 0.68239780  | 1.55857568  |
| C  | -2.01934314 | -0.23329742 | 2.23924206  |
| C  | -1.27691694 | -0.96949724 | -1.88295974 |
| C  | -4.78474289 | 0.50492344  | -0.26909498 |
| H  | -4.86551768 | -0.01064661 | -1.23971988 |
| H  | -5.75185586 | 0.38891356  | 0.25499815  |
| H  | -4.64884988 | 1.58115313  | -0.46301118 |
| C  | -3.01040342 | 2.14869731  | 1.84147751  |
| H  | -3.25457424 | 2.72029506  | 0.93172618  |
| H  | -3.82987159 | 2.31689810  | 2.56435833  |
| H  | -2.08713575 | 2.56257204  | 2.27563902  |
| C  | -1.07824413 | 0.07399766  | 3.36412979  |
| H  | -0.10995144 | -0.43426324 | 3.22179307  |
| H  | -0.88481852 | 1.15474415  | 3.44339292  |
| H  | -1.50440216 | -0.26671025 | 4.32528102  |
| C  | -1.60390613 | -2.83069886 | 2.09980741  |
| H  | -0.66836149 | -2.65246906 | 2.64972739  |
| H  | -2.29982344 | -3.35666345 | 2.77996975  |
| H  | -1.39248447 | -3.50678309 | 1.25544674  |
| C  | -3.92779594 | -2.59944781 | -0.02768873 |
| H  | -4.58015224 | -3.11922611 | 0.69838699  |
| H  | -4.55908899 | -2.28501294 | -0.87165633 |
| H  | -3.18925771 | -3.33029625 | -0.39340290 |
| Rh | -1.52449158 | -0.21036270 | 0.04549899  |
| C  | 0.05664760  | -1.28951365 | -1.42562895 |
| C  | 1.39880367  | -1.10328968 | 1.10421852  |
| C  | 2.52748940  | -0.29014197 | 1.48848076  |
| H  | 1.27265251  | -2.16159882 | 1.32954540  |
| C  | 2.34352772  | 1.00553839  | 0.92232739  |
| C  | 0.52669611  | -0.33442134 | 0.34960922  |
| N  | 1.11952056  | 0.96019491  | 0.22006611  |
| C  | 0.43137275  | 1.94856242  | -0.42787624 |
| N  | -0.86214792 | 1.61377561  | -0.74154490 |
| C  | -1.58684497 | 2.51612473  | -1.43006831 |
| C  | 0.26417768  | 4.01801448  | -1.37542250 |
| H  | -2.60757949 | 2.22054956  | -1.68740422 |
| H  | 0.74651856  | 4.97797036  | -1.59654073 |
| N  | 1.00708438  | 3.12031850  | -0.71685747 |
| C  | -1.05734962 | 3.76021154  | -1.77568549 |
| H  | -1.64984909 | 4.49402558  | -2.32630714 |

|   |             |             |             |
|---|-------------|-------------|-------------|
| C | 3.68805550  | -0.55171367 | 2.24121425  |
| C | 4.61533249  | 0.48000257  | 2.42221070  |
| H | 3.85850109  | -1.54279506 | 2.67182802  |
| H | 5.52309453  | 0.29518911  | 3.00484299  |
| C | 4.40244517  | 1.75725312  | 1.86209215  |
| C | 3.26123205  | 2.04469678  | 1.09739943  |
| H | 5.14643080  | 2.54411939  | 2.02121166  |
| H | 3.09784909  | 3.02381083  | 0.64570318  |
| C | -1.69276810 | -0.40934316 | -3.20007304 |
| H | -2.44063146 | 0.39239816  | -3.22935326 |
| H | -0.96041112 | -0.35833249 | -4.01628188 |
| C | -2.19270550 | -1.77758079 | -2.74217601 |
| H | -1.78183122 | -2.67242851 | -3.22824498 |
| H | -3.25552613 | -1.85601675 | -2.49487198 |
| H | 0.17790943  | -2.29747484 | -1.00844703 |
| C | 1.23512744  | -0.80624933 | -2.26390045 |
| H | 1.08787201  | -1.33610156 | -3.23049702 |
| H | 1.11855336  | 0.26477688  | -2.49950028 |
| C | 2.62413194  | -1.09900222 | -1.74962567 |
| C | 2.98953745  | -2.39967368 | -1.35072916 |
| C | 3.58174660  | -0.07358177 | -1.66856911 |
| C | 4.27268659  | -2.65985684 | -0.85385762 |
| H | 2.26838844  | -3.22170704 | -1.43308456 |
| C | 4.86913911  | -0.33144356 | -1.17899124 |
| H | 3.31248167  | 0.94192314  | -1.97972719 |
| C | 5.21420594  | -1.62361927 | -0.76151332 |
| H | 4.54222439  | -3.67528665 | -0.54552339 |
| H | 5.59861428  | 0.48141684  | -1.11341179 |
| H | 6.21696035  | -1.82586569 | -0.37212191 |

### Intermediate C1

Lowest frequency = 12.37 cm<sup>-1</sup>

E(PBE0-D3(BJ)/def2-TZVP+SMD(1,4-dioxane)) = -1552.179195 E<sub>h</sub>

E(PW6B95-D3(BJ)/def2-TZVP+SMD(1,4-dioxane)) = -1555.806424 E<sub>h</sub>

G<sub>corr</sub> (298.15) = 0.525664 E<sub>h</sub>

Charge = 1, Multiplicity = 1

|   |             |             |             |
|---|-------------|-------------|-------------|
| C | -3.34134649 | -1.28434342 | 0.66302786  |
| C | -3.59323275 | 0.13894603  | 0.68892965  |
| C | -2.26658713 | -1.55186244 | 1.58362704  |
| C | -2.74459888 | 0.72715799  | 1.74085503  |
| C | -1.94035419 | -0.30134139 | 2.28945089  |
| C | -1.12390652 | -1.00298230 | -1.78184087 |
| C | -4.68865782 | 0.84934236  | -0.04893184 |
| H | -4.83067196 | 0.43458293  | -1.06014087 |
| H | -5.64721533 | 0.74289116  | 0.49378093  |
| H | -4.48665825 | 1.92897311  | -0.13699674 |
| C | -2.75124338 | 2.17358434  | 2.13560613  |
| H | -2.85512062 | 2.83339836  | 1.25755330  |

|    |             |             |             |
|----|-------------|-------------|-------------|
| H  | -3.60438029 | 2.38536942  | 2.80641309  |
| H  | -1.82713905 | 2.45086614  | 2.66613783  |
| C  | -0.94590134 | -0.16659450 | 3.40406413  |
| H  | -0.10974496 | -0.87288806 | 3.28707933  |
| H  | -0.52375888 | 0.84973474  | 3.45111435  |
| H  | -1.43055194 | -0.37752382 | 4.37554730  |
| C  | -1.72391118 | -2.91158692 | 1.91434470  |
| H  | -0.72438138 | -2.84695997 | 2.37053694  |
| H  | -2.38821830 | -3.42173566 | 2.63697513  |
| H  | -1.65638407 | -3.54564714 | 1.01572482  |
| C  | -4.12030999 | -2.30800414 | -0.10193230 |
| H  | -4.93407647 | -2.69993305 | 0.53650059  |
| H  | -4.58414778 | -1.87962938 | -1.00398589 |
| H  | -3.49103878 | -3.15969686 | -0.40301832 |
| Rh | -1.54700601 | -0.18179307 | 0.07308607  |
| C  | 0.31245732  | -1.28982030 | -1.39118169 |
| C  | 1.44477189  | -1.15897697 | 0.91050599  |
| C  | 2.35468373  | -0.23578787 | 1.49237711  |
| H  | 1.38885489  | -2.22702214 | 1.12111148  |
| C  | 2.17704783  | 1.01583209  | 0.82125569  |
| C  | 0.67802979  | -0.51725192 | -0.07930290 |
| N  | 1.17177869  | 0.83906462  | -0.13223350 |
| C  | 0.44358700  | 1.83623780  | -0.76106515 |
| N  | -0.88910122 | 1.56995930  | -0.87228619 |
| C  | -1.64100729 | 2.46980977  | -1.53865094 |
| C  | 0.28110725  | 3.86241500  | -1.79070729 |
| H  | -2.69984303 | 2.22495698  | -1.65465452 |
| H  | 0.78395541  | 4.78096801  | -2.11551152 |
| N  | 1.04825105  | 2.94741106  | -1.17712985 |
| C  | -1.08663304 | 3.65677734  | -2.02238736 |
| H  | -1.70006911 | 4.39232129  | -2.54784169 |
| C  | 3.33777405  | -0.35453736 | 2.50342510  |
| C  | 4.08998121  | 0.76992011  | 2.83088131  |
| H  | 3.49880593  | -1.31144954 | 3.00836070  |
| H  | 4.86022363  | 0.70492192  | 3.60508376  |
| C  | 3.87794190  | 2.00554070  | 2.16863481  |
| C  | 2.92251178  | 2.15412601  | 1.15751769  |
| H  | 4.49221035  | 2.86823759  | 2.44575853  |
| H  | 2.78367224  | 3.09688430  | 0.62619267  |
| C  | -1.55493717 | -0.50163657 | -3.13106548 |
| H  | -2.38394460 | 0.21577589  | -3.18756817 |
| H  | -0.80844463 | -0.36885041 | -3.92475856 |
| C  | -1.89871401 | -1.91174754 | -2.68600955 |
| H  | -1.35937848 | -2.74643935 | -3.15571523 |
| H  | -2.94962760 | -2.13433764 | -2.47567489 |
| H  | 0.36521728  | -2.34592032 | -1.07389965 |
| C  | 1.42279811  | -1.05730180 | -2.46108853 |
| H  | 1.23504699  | -1.77157531 | -3.28394974 |
| H  | 1.32468671  | -0.04140569 | -2.87928516 |
| C  | 2.79857205  | -1.24827443 | -1.87100116 |
| C  | 3.19904818  | -2.50805797 | -1.37648823 |

|   |            |             |             |
|---|------------|-------------|-------------|
| C | 3.66492562 | -0.15265853 | -1.69828207 |
| C | 4.41964093 | -2.66011315 | -0.70496186 |
| H | 2.54976663 | -3.37976223 | -1.52293518 |
| C | 4.88412786 | -0.30049726 | -1.02445388 |
| H | 3.37009583 | 0.83156525  | -2.07902974 |
| C | 5.25987308 | -1.55284736 | -0.51620015 |
| H | 4.71761839 | -3.64540862 | -0.33156967 |
| H | 5.54074731 | 0.56520662  | -0.89188523 |
| H | 6.21133198 | -1.66844284 | 0.01260161  |

Transition State **TS(C1-D1)**

Lowest frequency = -104.40 cm<sup>-1</sup>

E(PBE0-D3(BJ)/def2-TZVP+SMD(1,4-dioxane)) = -1552.167312 E<sub>h</sub>

E(PW6B95-D3(BJ)/def2-TZVP+SMD(1,4-dioxane)) = -1555.794211 E<sub>h</sub>

G<sub>corr</sub> (298.15) = 0.523647 E<sub>h</sub>

Charge = 1, Multiplicity = 1

|    |             |             |             |
|----|-------------|-------------|-------------|
| C  | 3.74730131  | -0.38574794 | -0.95281140 |
| C  | 3.81510511  | 0.42158166  | 0.29242327  |
| C  | 2.81684785  | 0.23933251  | -1.84139630 |
| C  | 2.94247701  | 1.52737269  | 0.16409675  |
| C  | 2.24945785  | 1.38021759  | -1.11328267 |
| C  | 0.67467250  | -2.00160221 | -0.68479714 |
| C  | 4.69762813  | 0.09319098  | 1.45593759  |
| H  | 4.71976028  | -0.99184568 | 1.65123287  |
| H  | 5.73661663  | 0.40589225  | 1.23988394  |
| H  | 4.37398538  | 0.61100525  | 2.37190206  |
| C  | 2.66055542  | 2.60118240  | 1.17206495  |
| H  | 3.00692233  | 2.31384826  | 2.17708051  |
| H  | 3.17366159  | 3.53988525  | 0.89393931  |
| H  | 1.58121612  | 2.82259778  | 1.22859210  |
| C  | 1.24780156  | 2.34588605  | -1.65228487 |
| H  | 0.63256050  | 1.89810394  | -2.44485770 |
| H  | 0.57721189  | 2.72444573  | -0.86466976 |
| H  | 1.78607891  | 3.21544907  | -2.07747645 |
| C  | 2.48878600  | -0.14384518 | -3.25180719 |
| H  | 1.42150208  | 0.02259027  | -3.46667092 |
| H  | 3.08099946  | 0.46438855  | -3.95986294 |
| H  | 2.71279002  | -1.20401527 | -3.44310848 |
| C  | 4.61537114  | -1.57140328 | -1.23615873 |
| H  | 5.64562836  | -1.23357014 | -1.45594736 |
| H  | 4.66949224  | -2.25220484 | -0.37062263 |
| H  | 4.25452679  | -2.14015278 | -2.10594167 |
| Rh | 1.79167848  | -0.41259117 | -0.08383966 |
| C  | -0.83391593 | -1.66657430 | -0.74121153 |
| C  | -1.75988288 | 0.52424738  | -1.73821588 |
| C  | -2.15400843 | 1.81573518  | -1.23588972 |
| H  | -1.97738996 | 0.12000155  | -2.72720362 |
| C  | -1.78419771 | 1.86172989  | 0.13832084  |

|   |             |             |             |
|---|-------------|-------------|-------------|
| C | -1.13863682 | -0.18271346 | -0.73501268 |
| N | -1.13999004 | 0.63909437  | 0.43540625  |
| C | -0.59922568 | 0.30174083  | 1.66404286  |
| N | 0.56561180  | -0.40413795 | 1.65365278  |
| C | 1.01237571  | -0.88442393 | 2.83654089  |
| C | -0.73942713 | 0.28019567  | 3.94866967  |
| H | 1.91857067  | -1.49688800 | 2.80034118  |
| H | -1.26151227 | 0.63042340  | 4.84745191  |
| N | -1.23199477 | 0.69323613  | 2.77590661  |
| C | 0.37165743  | -0.57559839 | 4.03451550  |
| H | 0.73965774  | -0.95656005 | 4.98975809  |
| C | -2.77275512 | 2.93743972  | -1.82212917 |
| C | -2.99943236 | 4.06796933  | -1.03214808 |
| H | -3.06902586 | 2.91944189  | -2.87543190 |
| H | -3.48529123 | 4.94610805  | -1.46852034 |
| C | -2.61592551 | 4.09426119  | 0.32699883  |
| C | -2.00081422 | 2.99266721  | 0.93670152  |
| H | -2.81578655 | 4.98907613  | 0.92466597  |
| H | -1.73452343 | 3.00327798  | 1.99486387  |
| C | 1.19516461  | -3.28049683 | -0.02498752 |
| H | 2.16633694  | -3.26299945 | 0.48906385  |
| H | 0.47580799  | -3.97022484 | 0.43299399  |
| C | 1.20547087  | -3.11905951 | -1.53175870 |
| H | 0.47550370  | -3.70900821 | -2.10293124 |
| H | 2.17851852  | -3.02601591 | -2.02715503 |
| H | -1.18000070 | -1.97738737 | -1.74278861 |
| C | -1.74685240 | -2.42018240 | 0.27733345  |
| H | -1.61799356 | -3.50383848 | 0.11343437  |
| H | -1.41831367 | -2.21384583 | 1.31079841  |
| C | -3.19912740 | -2.03566756 | 0.08961429  |
| C | -3.93139655 | -2.55880539 | -0.99388674 |
| C | -3.81912699 | -1.09110463 | 0.92852015  |
| C | -5.24596575 | -2.14192641 | -1.23928938 |
| H | -3.46788678 | -3.30502507 | -1.65091029 |
| C | -5.13298907 | -0.66857398 | 0.68289392  |
| H | -3.27299174 | -0.67459286 | 1.78211719  |
| C | -5.84886503 | -1.18969907 | -0.40367371 |
| H | -5.80335267 | -2.56397020 | -2.08205180 |
| H | -5.59800560 | 0.06944767  | 1.34459658  |
| H | -6.87566312 | -0.86170719 | -0.59489652 |

### Intermediate D1

Lowest frequency = 23.48 cm<sup>-1</sup>

E(PBE0-D3(BJ)/def2-TZVP+SMD(1,4-dioxane)) = -1552.170694 E<sub>h</sub>

E(PW6B95-D3(BJ)/def2-TZVP+SMD(1,4-dioxane)) = -1555.798521 E<sub>h</sub>

G<sub>corr</sub> (298.15) = 0.525280 E<sub>h</sub>

Charge = 1, Multiplicity = 1

|   |            |            |             |
|---|------------|------------|-------------|
| C | 0.72559930 | 2.45273074 | -2.03987259 |
|---|------------|------------|-------------|



|    |             |             |             |
|----|-------------|-------------|-------------|
| C  | -0.49260916 | 3.23196431  | -1.73091794 |
| C  | 0.34204334  | 1.09717149  | -2.31684966 |
| C  | -1.59416722 | 2.35114894  | -1.75541234 |
| C  | -1.08755289 | 0.99887585  | -2.05485782 |
| C  | 1.18747945  | 0.38855562  | 0.75359918  |
| C  | -0.51061675 | 4.70885424  | -1.47492511 |
| H  | 0.35232282  | 5.02818251  | -0.86804986 |
| H  | -0.45613218 | 5.25843412  | -2.43350098 |
| H  | -1.43324894 | 5.02228774  | -0.96224577 |
| C  | -3.03294602 | 2.67690146  | -1.48908243 |
| H  | -3.14131887 | 3.63212511  | -0.95207116 |
| H  | -3.59082115 | 2.75725081  | -2.44005371 |
| H  | -3.51883775 | 1.88679567  | -0.89236897 |
| C  | -1.93376740 | -0.21154719 | -2.29202078 |
| H  | -1.39331401 | -1.13892708 | -2.04850557 |
| H  | -2.86069996 | -0.18855852 | -1.70017144 |
| H  | -2.22077387 | -0.25436552 | -3.36021576 |
| C  | 1.22033407  | -0.02291554 | -2.78563284 |
| H  | 0.87465274  | -0.98759536 | -2.38220970 |
| H  | 1.19881503  | -0.08273570 | -3.88939034 |
| H  | 2.26571877  | 0.12551185  | -2.47389929 |
| C  | 2.08823029  | 3.05527930  | -2.21410209 |
| H  | 2.11714006  | 3.64537311  | -3.14900459 |
| H  | 2.34492869  | 3.73944880  | -1.38814807 |
| H  | 2.86890743  | 2.28297220  | -2.28439809 |
| Rh | -0.11306953 | 1.53671573  | -0.26054913 |
| C  | 0.76383527  | -0.90725769 | 1.44854734  |
| C  | -0.36265482 | -2.79876408 | 0.11592032  |
| C  | -1.71574989 | -3.20685664 | -0.17644747 |
| H  | 0.54209463  | -3.38187852 | -0.05771647 |
| C  | -2.57841052 | -2.20144141 | 0.33982811  |
| C  | -0.38933741 | -1.58286827 | 0.75199115  |
| N  | -1.75053065 | -1.18062394 | 0.87995056  |
| C  | -2.21954500 | -0.01325341 | 1.45114935  |
| N  | -1.50703034 | 1.13933386  | 1.28155356  |
| C  | -1.90555463 | 2.22078473  | 1.99703006  |
| C  | -3.79549312 | 1.01357715  | 2.77320954  |
| H  | -1.29123054 | 3.11969700  | 1.88528397  |
| H  | -4.75233490 | 0.93016075  | 3.30344265  |
| N  | -3.37256274 | -0.07809681 | 2.13468270  |
| C  | -3.04969116 | 2.20496498  | 2.78728794  |
| H  | -3.36230771 | 3.08522573  | 3.35318676  |
| C  | -2.26621415 | -4.32566881 | -0.83017049 |
| C  | -3.65577707 | -4.41242714 | -0.95752776 |
| H  | -1.61499936 | -5.10936148 | -1.22931855 |
| H  | -4.10241390 | -5.27773713 | -1.45688790 |
| C  | -4.49371534 | -3.39961964 | -0.44513574 |
| C  | -3.97102857 | -2.27710365 | 0.21214150  |
| H  | -5.57910209 | -3.49546849 | -0.54831551 |
| H  | -4.62559708 | -1.51290611 | 0.63263968  |
| C  | 1.66509624  | 1.65620186  | 1.46647234  |

|   |             |             |             |
|---|-------------|-------------|-------------|
| H | 1.45717092  | 2.64929736  | 1.00883211  |
| H | 1.68483657  | 1.69308452  | 2.56185818  |
| C | 2.61987327  | 0.77398179  | 0.65792453  |
| H | 3.34245914  | 0.16917962  | 1.22329065  |
| H | 3.02754655  | 1.21742241  | -0.25700271 |
| H | 1.59489305  | -1.61991013 | 1.30802796  |
| C | 0.54425964  | -0.81597468 | 2.99300180  |
| H | 1.48321848  | -0.45257730 | 3.44684217  |
| H | -0.23285493 | -0.06880834 | 3.22664147  |
| C | 0.17552334  | -2.16676129 | 3.56809016  |
| C | 1.17065549  | -3.14048682 | 3.77828904  |
| C | -1.16603515 | -2.50661799 | 3.82279564  |
| C | 0.83372030  | -4.42449519 | 4.22575981  |
| H | 2.22250675  | -2.88938263 | 3.59405420  |
| C | -1.50663803 | -3.79166877 | 4.26697296  |
| H | -1.95792616 | -1.76493676 | 3.67079691  |
| C | -0.50825314 | -4.75500053 | 4.46670739  |
| H | 1.62033599  | -5.16807454 | 4.39077630  |
| H | -2.55587072 | -4.03934059 | 4.45777994  |
| H | -0.77326484 | -5.75836174 | 4.81514946  |

### Intermediate D2

Lowest frequency = 11.36 cm<sup>-1</sup>

E(PBE0-D3(BJ)/def2-TZVP+SMD(1,4-dioxane)) = -1552.176052 E<sub>h</sub>

E(PW6B95-D3(BJ)/def2-TZVP+SMD(1,4-dioxane)) = -1555.802637 E<sub>h</sub>

G<sub>corr</sub> (298.15) = 0.525707 E<sub>h</sub>

Charge = 1, Multiplicity = 1

|   |             |             |             |
|---|-------------|-------------|-------------|
| C | -1.44395534 | -1.82001895 | 1.21449558  |
| C | -2.59750647 | -1.28418145 | 0.47004589  |
| C | -0.82489524 | -0.73375460 | 1.93797878  |
| C | -2.62476468 | 0.11780107  | 0.65568164  |
| C | -1.49313904 | 0.47835273  | 1.53249506  |
| C | 1.38504416  | -0.90762404 | -0.47281907 |
| C | -3.56752989 | -2.11241707 | -0.31942232 |
| H | -3.06590842 | -2.94526071 | -0.83782802 |
| H | -4.32265206 | -2.55346919 | 0.35769409  |
| H | -4.10152224 | -1.50803032 | -1.06904659 |
| C | -3.62264733 | 1.09425077  | 0.10926890  |
| H | -4.13694990 | 0.69614162  | -0.77964601 |
| H | -4.39240114 | 1.32342948  | 0.86946983  |
| H | -3.14352352 | 2.04803495  | -0.16653442 |
| C | -1.25720989 | 1.84164311  | 2.10293778  |
| H | -0.22886327 | 1.96042059  | 2.47280077  |
| H | -1.45434662 | 2.63795217  | 1.36876216  |
| H | -1.94666673 | 2.00277256  | 2.95334759  |
| C | 0.29692838  | -0.82922791 | 2.92706194  |
| H | 0.97690432  | 0.03385401  | 2.84344398  |
| H | -0.10878605 | -0.84956193 | 3.95533869  |

|    |             |             |             |
|----|-------------|-------------|-------------|
| H  | 0.88586189  | -1.74879646 | 2.78373455  |
| C  | -1.10435158 | -3.27581495 | 1.34462274  |
| H  | -1.69066280 | -3.73150850 | 2.16408434  |
| H  | -1.33985199 | -3.83211029 | 0.42301326  |
| H  | -0.03769296 | -3.42373996 | 1.57806977  |
| Rh | -0.62358681 | -0.43434411 | -0.21922433 |
| C  | 2.27730506  | 0.26290781  | -0.80987270 |
| C  | 3.68338036  | 0.03854075  | -1.36220560 |
| C  | 2.64938625  | 0.71716096  | -2.21507213 |
| H  | 3.95075480  | -0.99110211 | -1.61836140 |
| H  | 4.49762231  | 0.63824948  | -0.94308201 |
| H  | 2.74769139  | 1.79878794  | -2.36359123 |
| H  | 2.24301709  | 0.17488504  | -3.07082808 |
| C  | 2.88825969  | 1.63542541  | 1.31108990  |
| C  | 2.45141020  | 2.90133631  | 1.85304777  |
| H  | 3.71778214  | 1.02609292  | 1.67070521  |
| C  | 1.42717280  | 3.39830562  | 0.99780300  |
| C  | 2.13883172  | 1.35319699  | 0.19633378  |
| N  | 1.20446985  | 2.41063165  | 0.00355236  |
| C  | 0.24861678  | 2.47898911  | -0.99566599 |
| N  | -0.38213688 | 1.33223966  | -1.40168412 |
| C  | -1.21054505 | 1.44441408  | -2.46917795 |
| C  | -0.89072474 | 3.79458210  | -2.49954610 |
| H  | -1.69330679 | 0.51865118  | -2.79373923 |
| H  | -1.10795027 | 4.80768479  | -2.86067885 |
| N  | -0.02814470 | 3.69529972  | -1.48760370 |
| C  | -1.48424549 | 2.66302136  | -3.08159057 |
| H  | -2.15911148 | 2.72881165  | -3.93787402 |
| C  | 2.83998187  | 3.65203673  | 2.97975911  |
| C  | 2.20233977  | 4.87108178  | 3.22762713  |
| H  | 3.62697701  | 3.28407238  | 3.64534990  |
| H  | 2.49445795  | 5.47006940  | 4.09566736  |
| C  | 1.19005689  | 5.34614764  | 2.36678243  |
| C  | 0.78655502  | 4.62083812  | 1.23758919  |
| H  | 0.71570247  | 6.31035767  | 2.57460625  |
| H  | 0.02395208  | 5.00542747  | 0.55954670  |
| C  | 0.73515684  | -1.84217766 | -1.45940108 |
| H  | -0.40651697 | -1.49152225 | -1.65960229 |
| H  | 1.73981738  | -1.41385365 | 0.43736947  |
| H  | 0.61195872  | -2.83578913 | -1.00032113 |
| C  | 1.22576831  | -2.00281027 | -2.88876584 |
| C  | 2.42609251  | -2.70481465 | -3.11124182 |
| C  | 0.50996491  | -1.51020255 | -3.99199569 |
| C  | 2.91585615  | -2.87350975 | -4.41242642 |
| H  | 2.97720482  | -3.12391819 | -2.26217305 |
| C  | 0.99867573  | -1.67872983 | -5.29518665 |
| H  | -0.43858680 | -0.98710895 | -3.83058957 |
| C  | 2.20845577  | -2.35380894 | -5.50721920 |
| H  | 3.85236689  | -3.41713225 | -4.57254314 |
| H  | 0.43185203  | -1.28567230 | -6.14513651 |
| H  | 2.59402846  | -2.48541808 | -6.52287748 |

Transition State **TS(D2-E1)**

Lowest frequency = -607.79 cm<sup>-1</sup>

E(PBE0-D3(BJ)/def2-TZVP+SMD(1,4-dioxane)) = -1552.168688 E<sub>h</sub>

E(PW6B95-D3(BJ)/def2-TZVP+SMD(1,4-dioxane)) = -1555.795435 E<sub>h</sub>

G<sub>corr</sub> (298.15) = 0.523714 E<sub>h</sub>

Charge = 1, Multiplicity = 1

|    |             |             |             |
|----|-------------|-------------|-------------|
| C  | 0.30690230  | 2.67641897  | -1.52367019 |
| C  | 0.97707439  | 3.21421436  | -0.34392685 |
| C  | -1.00813849 | 2.20721493  | -1.12880608 |
| C  | 0.11225262  | 3.02727239  | 0.78655590  |
| C  | -1.10537288 | 2.38868893  | 0.29290299  |
| C  | 0.95971891  | -0.55609489 | -1.46003470 |
| C  | 2.30842064  | 3.90636810  | -0.34315018 |
| H  | 2.99336051  | 3.47357452  | -1.08915985 |
| H  | 2.17192134  | 4.97397706  | -0.59637929 |
| H  | 2.79240494  | 3.85161445  | 0.64400751  |
| C  | 0.33893789  | 3.50313407  | 2.19197278  |
| H  | 1.41317875  | 3.59574870  | 2.41722302  |
| H  | -0.12424534 | 4.49547501  | 2.34737322  |
| H  | -0.10748562 | 2.81439212  | 2.92793098  |
| C  | -2.30238592 | 2.08734016  | 1.14116824  |
| H  | -2.96894687 | 1.35211681  | 0.66816943  |
| H  | -2.01442499 | 1.71664668  | 2.13830141  |
| H  | -2.87962462 | 3.01794965  | 1.29462740  |
| C  | -2.07742588 | 1.68970776  | -2.04296359 |
| H  | -2.80255182 | 1.06209786  | -1.50337228 |
| H  | -2.62848097 | 2.53304813  | -2.49946213 |
| H  | -1.65455209 | 1.08427522  | -2.86023176 |
| C  | 0.81627586  | 2.76002480  | -2.93232401 |
| H  | 0.47805145  | 3.70468018  | -3.39708207 |
| H  | 1.91705444  | 2.74960786  | -2.97221402 |
| H  | 0.43462655  | 1.93369276  | -3.55321459 |
| Rh | 0.63313945  | 1.06036721  | -0.10655945 |
| C  | 0.29238404  | -1.84349323 | -1.06368859 |
| C  | 0.78576940  | -3.17235136 | -1.63470771 |
| C  | 0.91091066  | -2.90324435 | -0.16265439 |
| H  | 1.69985612  | -3.13816854 | -2.23489794 |
| H  | 0.03123956  | -3.88726772 | -1.97788072 |
| H  | 0.22111004  | -3.42908620 | 0.50739933  |
| H  | 1.90491230  | -2.72397554 | 0.25246013  |
| C  | -2.16468245 | -1.91981293 | -1.89075558 |
| C  | -3.44708626 | -1.66531077 | -1.27947336 |
| H  | -1.98684466 | -2.28866529 | -2.90112434 |
| C  | -3.20422283 | -1.28379357 | 0.07084912  |
| C  | -1.18163633 | -1.66996803 | -0.96726386 |
| N  | -1.79707618 | -1.24847615 | 0.24662470  |
| C  | -1.14834298 | -0.98223376 | 1.44401927  |

|   |             |             |             |
|---|-------------|-------------|-------------|
| N | 0.03907841  | -0.29743031 | 1.43337631  |
| C | 0.67349724  | -0.17250419 | 2.62511842  |
| C | -1.15069248 | -1.20977056 | 3.73332177  |
| H | 1.62695776  | 0.35915472  | 2.59962814  |
| H | -1.69521879 | -1.53892327 | 4.62722614  |
| N | -1.76155568 | -1.39328778 | 2.56201283  |
| C | 0.12699939  | -0.63566266 | 3.81799540  |
| H | 0.65609445  | -0.51675147 | 4.76617358  |
| C | -4.77050612 | -1.72124280 | -1.75830603 |
| C | -5.81505603 | -1.39929633 | -0.88712240 |
| H | -4.97208510 | -2.01176498 | -2.79398512 |
| H | -6.84976122 | -1.44110017 | -1.24093289 |
| C | -5.55437139 | -1.02868169 | 0.44942325  |
| C | -4.24779753 | -0.96813940 | 0.95241012  |
| H | -6.39028999 | -0.79590947 | 1.11640697  |
| H | -4.05573813 | -0.71347673 | 1.99532099  |
| C | 2.27407806  | -0.08054024 | -1.08144714 |
| H | 2.18519128  | 0.79227258  | 0.24581137  |
| H | 0.58393777  | -0.17889099 | -2.42049646 |
| H | 2.68412852  | 0.64936115  | -1.79511883 |
| C | 3.37056466  | -0.94659158 | -0.50512373 |
| C | 4.03251196  | -1.81357071 | -1.39992683 |
| C | 3.79727805  | -0.90554173 | 0.83159770  |
| C | 5.06770236  | -2.64299244 | -0.95197739 |
| H | 3.73530336  | -1.83475009 | -2.45408288 |
| C | 4.83380733  | -1.73478631 | 1.28301558  |
| H | 3.31238789  | -0.21184169 | 1.52633769  |
| C | 5.46625662  | -2.61279489 | 0.39310963  |
| H | 5.56749715  | -3.31389844 | -1.65783056 |
| H | 5.14880409  | -1.69109030 | 2.33041087  |
| H | 6.27366014  | -3.26368359 | 0.74239361  |

### Intermediate E1

Lowest frequency = 24.58 cm<sup>-1</sup>

E(PBE0-D3(BJ)/def2-TZVP+SMD(1,4-dioxane)) = -1552.171650 E<sub>h</sub>

E(PW6B95-D3(BJ)/def2-TZVP+SMD(1,4-dioxane)) = -1555.799347 E<sub>h</sub>

G<sub>corr</sub> (298.15) = 0.524820 E<sub>h</sub>

Charge = 1, Multiplicity = 1

|   |             |             |             |
|---|-------------|-------------|-------------|
| C | -1.19520654 | -1.58749371 | 1.28571399  |
| C | -2.33932125 | -1.47667981 | 0.39951780  |
| C | -0.88221588 | -0.26740675 | 1.81209993  |
| C | -2.69582112 | -0.07306811 | 0.32579902  |
| C | -1.80276663 | 0.65190053  | 1.21630755  |
| C | 1.42607518  | -0.94092773 | -0.49161160 |
| C | -3.08409135 | -2.62268664 | -0.22043795 |
| H | -2.40457229 | -3.43981945 | -0.50809536 |
| H | -3.81285821 | -3.02869965 | 0.50523838  |
| H | -3.63663365 | -2.30553588 | -1.11762474 |

|    |             |             |             |
|----|-------------|-------------|-------------|
| C  | -3.87929901 | 0.51769199  | -0.38495619 |
| H  | -4.19054829 | -0.10828362 | -1.23537991 |
| H  | -4.73891201 | 0.60516829  | 0.30517280  |
| H  | -3.65704078 | 1.52791600  | -0.76541140 |
| C  | -1.89999312 | 2.11879357  | 1.49670088  |
| H  | -0.97817175 | 2.51594676  | 1.94460150  |
| H  | -2.12954261 | 2.69438100  | 0.58532746  |
| H  | -2.72739940 | 2.29700712  | 2.20849993  |
| C  | 0.14469253  | 0.03849154  | 2.85988215  |
| H  | 0.43534102  | 1.09967896  | 2.84595690  |
| H  | -0.25617080 | -0.19369256 | 3.86425121  |
| H  | 1.05852707  | -0.56124884 | 2.72126924  |
| C  | -0.55370640 | -2.86793458 | 1.72952136  |
| H  | -0.98005151 | -3.17171983 | 2.70349581  |
| H  | -0.73586442 | -3.68707496 | 1.01734365  |
| H  | 0.53387874  | -2.75778181 | 1.87135549  |
| Rh | -0.68025902 | -0.39289541 | -0.47682122 |
| C  | 2.34819209  | 0.19576022  | -0.81463147 |
| C  | 3.72792467  | -0.09875482 | -1.40630559 |
| C  | 2.70889643  | 0.63889771  | -2.22474744 |
| H  | 3.93496278  | -1.13945929 | -1.67170716 |
| H  | 4.57823267  | 0.45594726  | -0.99711293 |
| H  | 2.85974715  | 1.71476491  | -2.36931107 |
| H  | 2.24246907  | 0.12100774  | -3.06595973 |
| C  | 3.07558935  | 1.44418968  | 1.33671476  |
| C  | 2.63083140  | 2.63704518  | 2.01618285  |
| H  | 3.91874023  | 0.81185480  | 1.61567985  |
| C  | 1.55335790  | 3.17856938  | 1.25909560  |
| C  | 2.28299070  | 1.24624638  | 0.23499793  |
| N  | 1.31353700  | 2.28908497  | 0.17996834  |
| C  | 0.42364229  | 2.51693572  | -0.86106375 |
| N  | -0.22463230 | 1.46129053  | -1.45079573 |
| C  | -0.93253231 | 1.75069833  | -2.57334613 |
| C  | -0.52323412 | 4.06860030  | -2.27354645 |
| H  | -1.40844848 | 0.90045986  | -3.06322853 |
| H  | -0.67107151 | 5.12920439  | -2.51241050 |
| N  | 0.24004105  | 3.79510707  | -1.21527053 |
| C  | -1.09276965 | 3.04783944  | -3.04891575 |
| H  | -1.67269029 | 3.24852309  | -3.95255342 |
| C  | 3.04595567  | 3.28412792  | 3.19652289  |
| C  | 2.38485693  | 4.45023391  | 3.59191090  |
| H  | 3.87148760  | 2.87779330  | 3.78898549  |
| H  | 2.69610229  | 4.96844598  | 4.50410885  |
| C  | 1.32439525  | 4.97660661  | 2.82354866  |
| C  | 0.89368867  | 4.35455139  | 1.64423007  |
| H  | 0.83306798  | 5.90006542  | 3.14545672  |
| H  | 0.09577114  | 4.78557553  | 1.03860293  |
| C  | 0.73137009  | -1.81797400 | -1.36804611 |
| H  | -1.26645094 | -0.83132347 | -1.86617099 |
| H  | 1.58101325  | -1.30291237 | 0.53331486  |
| H  | 0.42933973  | -2.76840546 | -0.90515299 |

|   |             |             |             |
|---|-------------|-------------|-------------|
| C | 0.99592920  | -1.97175977 | -2.84090216 |
| C | 2.15181192  | -2.70629671 | -3.19118977 |
| C | 0.17241353  | -1.50327181 | -3.87770313 |
| C | 2.48880538  | -2.92276604 | -4.53271454 |
| H | 2.78998025  | -3.11503954 | -2.40007085 |
| C | 0.50527540  | -1.71836549 | -5.22282125 |
| H | -0.74919553 | -0.97067832 | -3.62241235 |
| C | 1.67064611  | -2.42088470 | -5.55561571 |
| H | 3.39291334  | -3.48863536 | -4.77917465 |
| H | -0.15204059 | -1.33866242 | -6.01168745 |
| H | 1.93450808  | -2.58676062 | -6.60470283 |

Transition State **TS(B-C)'**

Lowest frequency = -283.03 cm<sup>-1</sup>

E(PBE0-D3(BJ)/def2-TZVP+SMD(1,4-dioxane)) = -1552.154752 E<sub>h</sub>

E(PW6B95-D3(BJ)/def2-TZVP+SMD(1,4-dioxane)) = -1555.782018 E<sub>h</sub>

G<sub>corr</sub> (298.15) = 0.524198 E<sub>h</sub>

Charge = 1, Multiplicity = 1

|    |             |             |             |
|----|-------------|-------------|-------------|
| C  | 1.02415636  | 2.83874374  | -0.93836464 |
| C  | 0.44945177  | 3.18713434  | 0.32884533  |
| C  | -0.04205003 | 2.37642080  | -1.80298270 |
| C  | -1.00672670 | 3.03853373  | 0.20539317  |
| C  | -1.30948377 | 2.58267358  | -1.11271926 |
| C  | 1.60611256  | -0.27159125 | 0.27688909  |
| C  | 1.17537646  | 3.81031399  | 1.48587770  |
| H  | 2.18766494  | 3.39103194  | 1.60266516  |
| H  | 1.27989236  | 4.90080508  | 1.33166753  |
| H  | 0.62957462  | 3.67097204  | 2.43285046  |
| C  | -1.99832545 | 3.37637091  | 1.27786065  |
| H  | -1.60064182 | 3.16062714  | 2.28254811  |
| H  | -2.23451069 | 4.45587922  | 1.24257790  |
| H  | -2.93958515 | 2.81963322  | 1.15082979  |
| C  | -2.66984404 | 2.36212339  | -1.69759971 |
| H  | -3.44474492 | 2.33311883  | -0.91663309 |
| H  | -2.91803757 | 3.18235052  | -2.39542232 |
| H  | -2.71834969 | 1.41277446  | -2.25592325 |
| C  | 0.12021278  | 1.96921967  | -3.23803381 |
| H  | -0.76517360 | 1.42660945  | -3.60146597 |
| H  | 0.24984710  | 2.86322219  | -3.87603603 |
| H  | 1.00363969  | 1.32550968  | -3.37727147 |
| C  | 2.43749442  | 3.08940659  | -1.36356965 |
| H  | 2.50215228  | 4.12250817  | -1.75495481 |
| H  | 3.14997955  | 3.00685006  | -0.52980288 |
| H  | 2.75608528  | 2.41332445  | -2.17093636 |
| Rh | -0.03151454 | 1.06167178  | -0.04295117 |
| C  | 0.75312652  | -1.04156005 | -0.60178871 |
| C  | 1.15793866  | -1.74395740 | -1.84973080 |
| C  | 0.63027652  | -2.53804379 | -0.65507580 |

|   |             |             |             |
|---|-------------|-------------|-------------|
| H | 2.23006217  | -1.78460190 | -2.06916719 |
| H | 0.51068891  | -1.70723001 | -2.72907169 |
| H | -0.35241337 | -3.00945912 | -0.76615185 |
| H | 1.35097985  | -3.08880641 | -0.03867200 |
| C | -1.79126656 | -0.94319246 | -1.84105974 |
| C | -2.90577899 | -1.79544901 | -1.50580419 |
| H | -1.45530689 | -0.70824081 | -2.85038807 |
| C | -2.95574132 | -1.91063216 | -0.08386858 |
| C | -1.16400398 | -0.54428133 | -0.67081620 |
| N | -1.89841105 | -1.11962661 | 0.41394601  |
| C | -1.60687292 | -0.74208152 | 1.69367933  |
| N | -0.68151272 | 0.26679263  | 1.78222119  |
| C | -0.30283510 | 0.65641594  | 3.01611438  |
| C | -1.84477005 | -0.89828938 | 3.95843050  |
| H | 0.46719839  | 1.43168054  | 3.06165918  |
| H | -2.34910551 | -1.37706838 | 4.80675389  |
| N | -2.20049746 | -1.32372771 | 2.74206100  |
| C | -0.87238548 | 0.09690950  | 4.15929516  |
| H | -0.57259361 | 0.42183739  | 5.15796565  |
| C | -3.86408416 | -2.47702909 | -2.28302098 |
| C | -4.83472231 | -3.24275307 | -1.62930765 |
| H | -3.84613505 | -2.40666654 | -3.37494090 |
| H | -5.58405283 | -3.78159499 | -2.21736758 |
| C | -4.86490414 | -3.33557371 | -0.22108123 |
| C | -3.92542338 | -2.66914540 | 0.57997655  |
| H | -5.63520073 | -3.94581339 | 0.26047605  |
| H | -3.93713012 | -2.73969979 | 1.66811771  |
| C | 2.99952468  | 0.14825852  | -0.15751184 |
| H | 2.99022332  | 0.48685481  | -1.20433677 |
| H | 3.33811857  | 0.99658339  | 0.46492286  |
| C | 3.98620149  | -1.00653113 | -0.01779606 |
| C | 4.70751962  | -1.46980360 | -1.13408950 |
| C | 4.19137864  | -1.63788616 | 1.22506376  |
| C | 5.60739359  | -2.53900089 | -1.01610885 |
| H | 4.57292436  | -0.97906870 | -2.10557822 |
| C | 5.08888972  | -2.70691481 | 1.34605493  |
| H | 3.65385431  | -1.28466340 | 2.11287692  |
| C | 5.79713318  | -3.16340911 | 0.22419963  |
| H | 6.16266889  | -2.88204210 | -1.89511469 |
| H | 5.24044652  | -3.18257287 | 2.32058692  |
| H | 6.49835478  | -3.99852514 | 0.31869482  |
| H | 1.57311581  | -0.58427448 | 1.33007586  |

Transition State **TS(B1-C1)'**

Lowest frequency = -266.02 cm<sup>-1</sup>

E(PBE0-D3(BJ)/def2-TZVP+SMD(1,4-dioxane)) = -1552.155590 E<sub>h</sub>

E(PW6B95-D3(BJ)/def2-TZVP+SMD(1,4-dioxane)) = -1555.782260 E<sub>h</sub>

G<sub>corr</sub> (298.15) = 0.523794 E<sub>h</sub>



Charge = 1, Multiplicity = 1

|    |             |             |             |
|----|-------------|-------------|-------------|
| C  | 2.83233885  | -1.88768607 | -0.68890144 |
| C  | 3.53214275  | -0.63132896 | -0.66178483 |
| C  | 1.74107727  | -1.77679812 | -1.63243994 |
| C  | 2.90095051  | 0.23598715  | -1.66232118 |
| C  | 1.82342164  | -0.47327343 | -2.27731166 |
| C  | 1.08553565  | -0.89150485 | 1.89277842  |
| C  | 4.78892125  | -0.32958581 | 0.10251998  |
| H  | 4.78775909  | -0.81470210 | 1.09205013  |
| H  | 5.67724737  | -0.69124790 | -0.44842495 |
| H  | 4.92187496  | 0.75415476  | 0.25214724  |
| C  | 3.35752899  | 1.62135484  | -2.00712376 |
| H  | 3.75966341  | 2.14988847  | -1.12798826 |
| H  | 4.16816871  | 1.57031397  | -2.75725753 |
| H  | 2.54077554  | 2.22514821  | -2.43167847 |
| C  | 0.93233697  | 0.00750966  | -3.38161634 |
| H  | -0.12796740 | -0.19763891 | -3.15434882 |
| H  | 1.03994038  | 1.09088172  | -3.54347765 |
| H  | 1.18247856  | -0.50479330 | -4.32828009 |
| C  | 0.83170208  | -2.89881878 | -2.03773460 |
| H  | -0.07672452 | -2.52404331 | -2.53185240 |
| H  | 1.35267196  | -3.56200510 | -2.75371976 |
| H  | 0.53451842  | -3.51574003 | -1.17446263 |
| C  | 3.22026048  | -3.14839172 | 0.02027763  |
| H  | 3.71228145  | -3.82887084 | -0.69924103 |
| H  | 3.93320782  | -2.96017088 | 0.83651460  |
| H  | 2.34520071  | -3.67555228 | 0.43236989  |
| Rh | 1.43818091  | -0.27082376 | -0.06825912 |
| C  | -0.31497788 | -0.83543410 | 1.51452548  |
| C  | -1.63809636 | -0.43196327 | -1.00046245 |
| C  | -2.63209874 | 0.59268699  | -1.19405900 |
| H  | -1.72299169 | -1.46291924 | -1.33447348 |
| C  | -2.17499226 | 1.77474655  | -0.53817491 |
| C  | -0.59551754 | 0.08665441  | -0.24529837 |
| N  | -0.91502068 | 1.46069716  | 0.01266858  |
| C  | 0.03641833  | 2.26448028  | 0.57611641  |
| N  | 1.26148120  | 1.66110415  | 0.72487684  |
| C  | 2.23635821  | 2.37896743  | 1.31610529  |
| C  | 0.74730579  | 4.23283038  | 1.48710589  |
| H  | 3.19541313  | 1.87150746  | 1.45048523  |
| H  | 0.50701735  | 5.26689108  | 1.76305489  |
| N  | -0.24185623 | 3.52320879  | 0.93287981  |
| C  | 2.02565434  | 3.69784301  | 1.71861013  |
| H  | 2.82186395  | 4.28011827  | 2.18733544  |
| C  | -3.88534722 | 0.60110646  | -1.83689702 |
| C  | -4.63853011 | 1.77904933  | -1.81540082 |
| H  | -4.25981894 | -0.29960700 | -2.33146027 |
| H  | -5.61666825 | 1.80525268  | -2.30554881 |
| C  | -4.16023550 | 2.93831258  | -1.16711481 |
| C  | -2.91782598 | 2.95894398  | -0.51436480 |

|   |             |             |             |
|---|-------------|-------------|-------------|
| H | -4.77437795 | 3.84427414  | -1.16623719 |
| H | -2.54535137 | 3.84754592  | -0.00327067 |
| C | 1.70977574  | -0.40714618 | 3.15794256  |
| H | 2.65015646  | 0.15635665  | 3.11672064  |
| H | 1.05259164  | -0.11556629 | 3.98844130  |
| C | 1.78259512  | -1.88090488 | 2.76168358  |
| H | 1.17279730  | -2.60476303 | 3.31920636  |
| H | 2.76781703  | -2.26448933 | 2.48038533  |
| H | -0.85611509 | 0.01113212  | 1.95930781  |
| C | -1.12643003 | -2.12023426 | 1.49232414  |
| H | -0.66939610 | -2.85108881 | 0.80440073  |
| H | -0.99213393 | -2.54841375 | 2.50817301  |
| C | -2.60981511 | -1.97670709 | 1.21955144  |
| C | -3.26599195 | -2.89073484 | 0.37370437  |
| C | -3.36564562 | -0.94410985 | 1.80701308  |
| C | -4.63319793 | -2.76013706 | 0.09529616  |
| H | -2.69486281 | -3.70907084 | -0.08123340 |
| C | -4.72948389 | -0.80366613 | 1.52308700  |
| H | -2.89042731 | -0.23050458 | 2.48965586  |
| C | -5.36737188 | -1.70873537 | 0.66234011  |
| H | -5.12512795 | -3.47992992 | -0.56707125 |
| H | -5.29676640 | 0.01499036  | 1.97690317  |
| H | -6.43368767 | -1.59905498 | 0.44116713  |

## 9. Proposed Mechanism

Based on our studies, we propose a plausible catalytic cycle for the electro-C–H cyclopropylation, which is initiated by the formation of a catalytically competent mononuclear cationic Cp\*Rh(III) species. As shown in figure 4, coordination of the N-atom of indole **1a** to Cp\*Rh(III) and the subsequent cyclorhodation at the 2-position affords rhodacycle **A**. Then, the insertion of alkene **4a** occurs to furnish intermediate **D**, which undergoes  $\beta$ -H elimination to generate the cyclopropylated product **5aa** along with a rhodium(I) complex. Finally, the Cp\*Rh(III) species is regenerated by reoxidation of rhodium(I) at the anode, while generating molecular hydrogen as the byproduct at the cathode and completing the catalytic cycle.

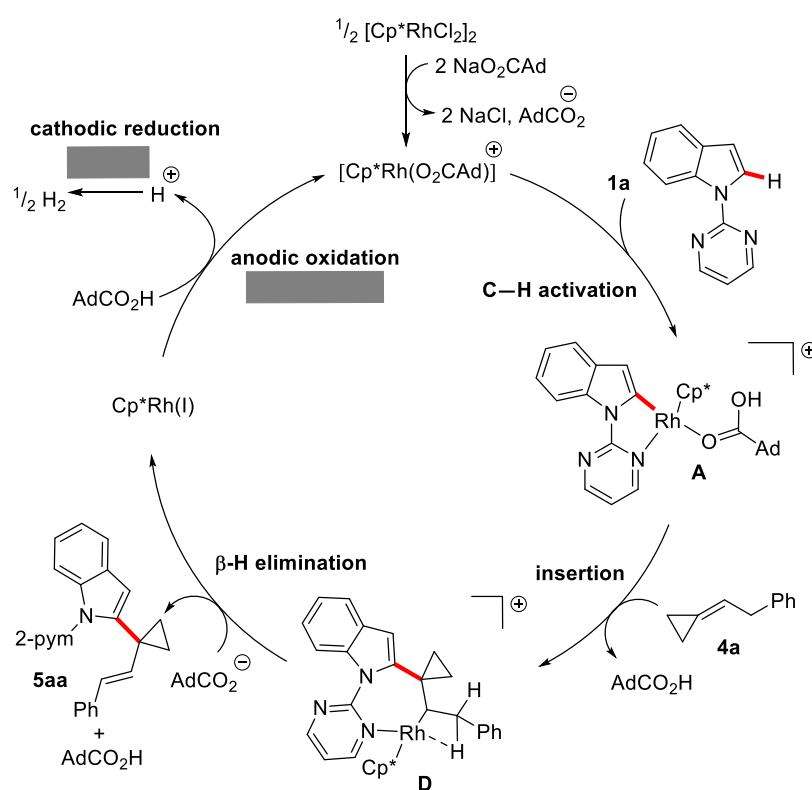

**Figure S-9.** Proposed mechanism for electro-C–H cyclopropylation with ACPs **4**.

In terms of dienylation, after the insertion of alkene **2a** the formed intermediate **D** preferentially undergoes  $\beta$ -C elimination to form intermediate **G** as there are no  $\beta$ -hydrogen atoms present (Figure S-9). The resulting intermediate **G** undergoes  $\beta$ -H elimination, delivering the dienyated indole **3aa**.

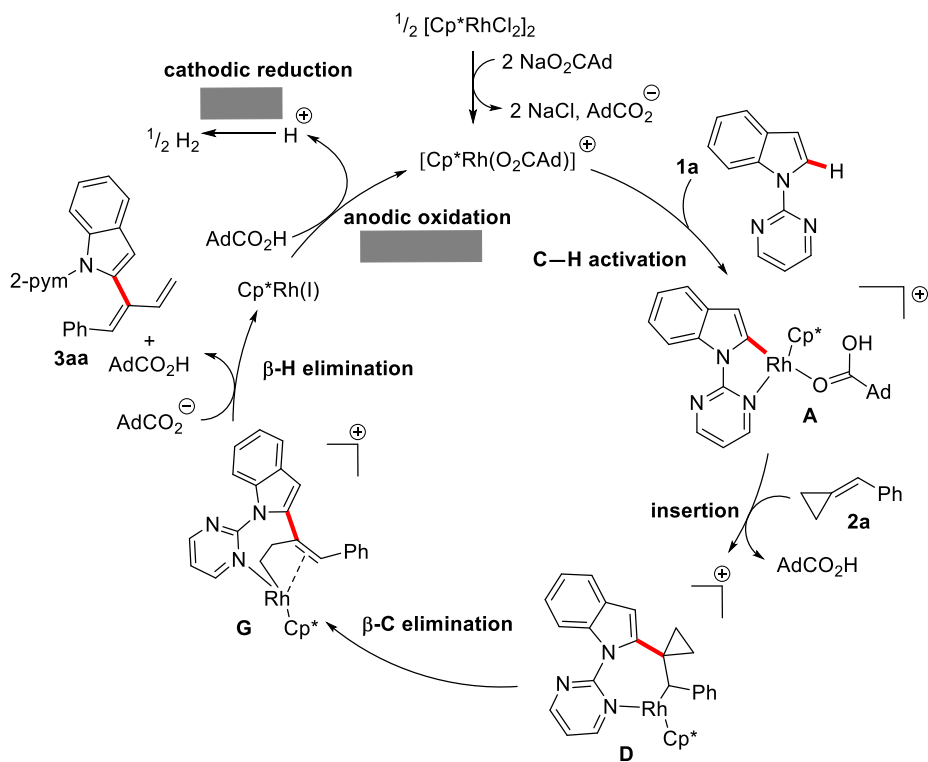

**Figure S-10.** Proposed mechanism for electrocatalytic C-H dienylation.

## 10. References

- [1] R. Liu, J. Liu, Y. Wei and M. Shi, *Org. Lett.*, 2019, **21**, 4077–4081.
- [2] J. M. Medina, T. Kang, T. G. Erbay, H. Shao, G. M. Gallego, S. Yang, M. Tran-Dubé, P. F. Richardson, J. Derosa, R. T. Helsel, R. L. Patman, F. Wang, C. P. Ashcroft, J. F. Braganza, I. McAlpine, P. Liu and K. M. Engle, *ACS Catal.*, 2019, **9**, 11130–11136.
- [3] T. Lomberget, I. Chataigner, D. Bouyssi, J. Maddaluno and G. Balme, *Tetrahedr. Lett.*, 2004, **45**, 3437–3441.
- [4] W.-J. Kong, L. H. Finger, J. C. A. Oliveira and L. Ackermann, *Angew. Chem. Int. Ed.*, 2019, **58**, 6342–6346.
- [5] X. Zhou, Y. Pan and X. Li, *Angew. Chem. Int. Ed.*, 2017, **56**, 8163–8167.
- [6] Gaussian 16, Revision A.03, M. J. Frisch, G. W. Trucks, H. B. Schlegel, G. E. Scuseria, M. A. Robb, J. R. Cheeseman, G. Scalmani, V. Barone, G. A. Petersson, H. Nakatsuji, X. Li, M. Caricato, A. V. Marenich, J. Bloino, B. G. Janesko, R. Gomperts, B. Mennucci, H. P. Hratchian, J. V. Ortiz, A. F. Izmaylov, J. L. Sonnenberg, D. Williams-Young, F. Ding, F. Lipparini, F. Egidi, J. Goings, B. Peng, A. Petrone, T. Henderson, D. Ranasinghe, V. G. Zakrzewski, J. Gao, N. Rega, G. Zheng, W. Liang, M. Hada, M. Ehara, K. Toyota, R. Fukuda, J. Hasegawa, M. Ishida, T. Nakajima, Y. Honda, O. Kitao, H. Nakai, T. Vreven, K. Throssell, J. A. Montgomery, Jr., J. E. Peralta, F. Ogliaro, M. J. Bearpark, J. J. Heyd, E. N. Brothers, K. N. Kudin, V. N. Staroverov, T. A. Keith, R. Kobayashi, J. Normand, K. Raghavachari, A. P. Rendell, J. C. Burant, S. S. Iyengar, J. Tomasi, M. Cossi, J. M. Millam, M. Klene, C. Adamo, R. Cammi, J. W. Ochterski, R. L. Martin, K. Morokuma, O. Farkas, J. B. Foresman and D. J. Fox, Gaussian, Inc., Wallingford CT, 2016.
- [7] J. M. Tao, J. P. Perdew, V. N. Staroverov and G. E. Scuseria, *Phys. Rev. Lett.*, 2003, **91**, 146401.
- [8] a) S. Grimme, S. Ehrlich and L. Goerigk, *J. Comput. Chem.*, 2011, **32**, 1456–1465; b) S. Grimme, J. Antony, S. Ehrlich and H. Krieg, *J. Chem. Phys.*, 2010, **132**, 154104–154119.
- [9] a) F. Weigend, *Phys. Chem. Chem. Phys.*, 2006, **8**, 1057–1065; b) F. Weigend and R. Ahlrichs, *Phys. Chem. Chem. Phys.*, 2005, **7**, 3297–3305; c) A. Schaefer, C.

- Huber and R. Ahlrichs, *J. Chem. Phys.*, 1994, **100**, 5829–5835; d) A. Schaefer, H. Horn and R. Ahlrichs, *J. Chem. Phys.*, 1992, **97**, 2571–2577.
- [10] D. Andrae, U. Haeussermann, M. Dolg, H. Stoll and H. Preuss, *Theor. Chim. Acta.*, 1990, **77**, 123–141.
- [11] C. Adamo and V. Barone, *J. Chem. Phys.*, 1999, **110**, 6158–6159.
- [12] Y. Zhao and D. G. Truhlar, *J. Phys. Chem. A.*, 2005, **109**, 5656–5667
- [13] A. V. Marenich, C. J. Cramer and D. G. Truhlar, *J. Phys. Chem. B.*, 2009, **113**, 6378–6396.
- [14] C. Y. Legault, CYLview, 1.0b, Université de Sherbrooke, 2009, <http://www.cylview.org>.

## 11. NMR Spectra

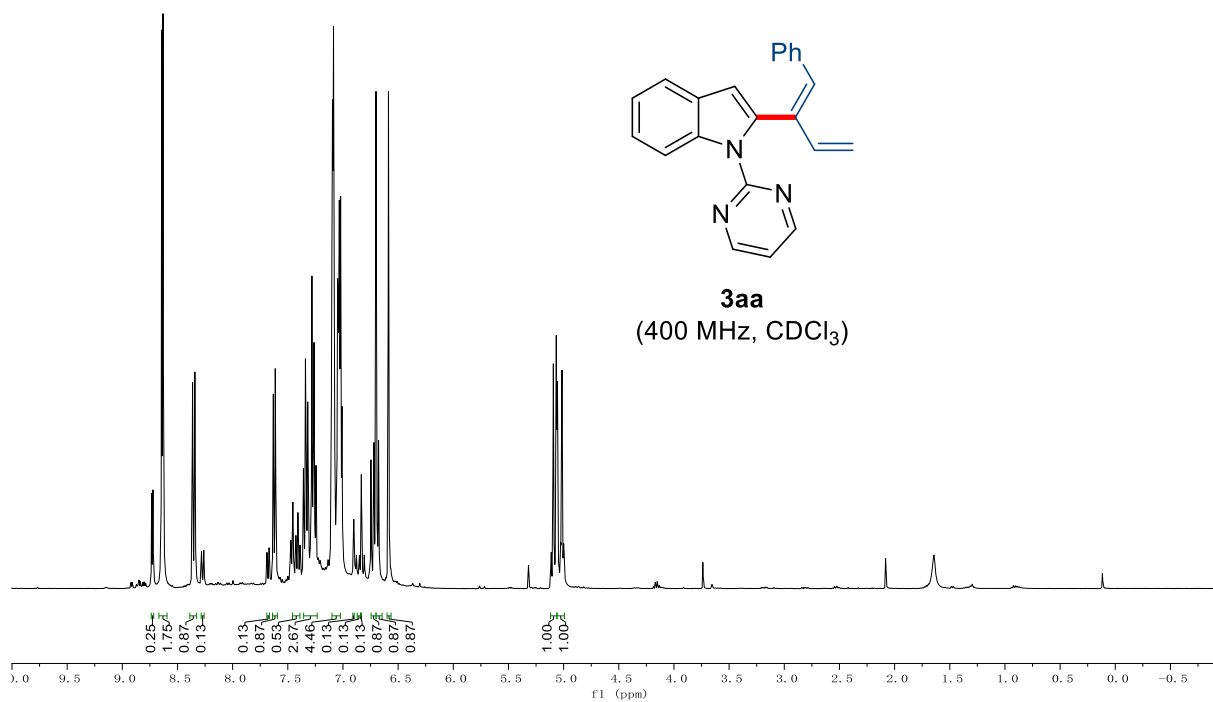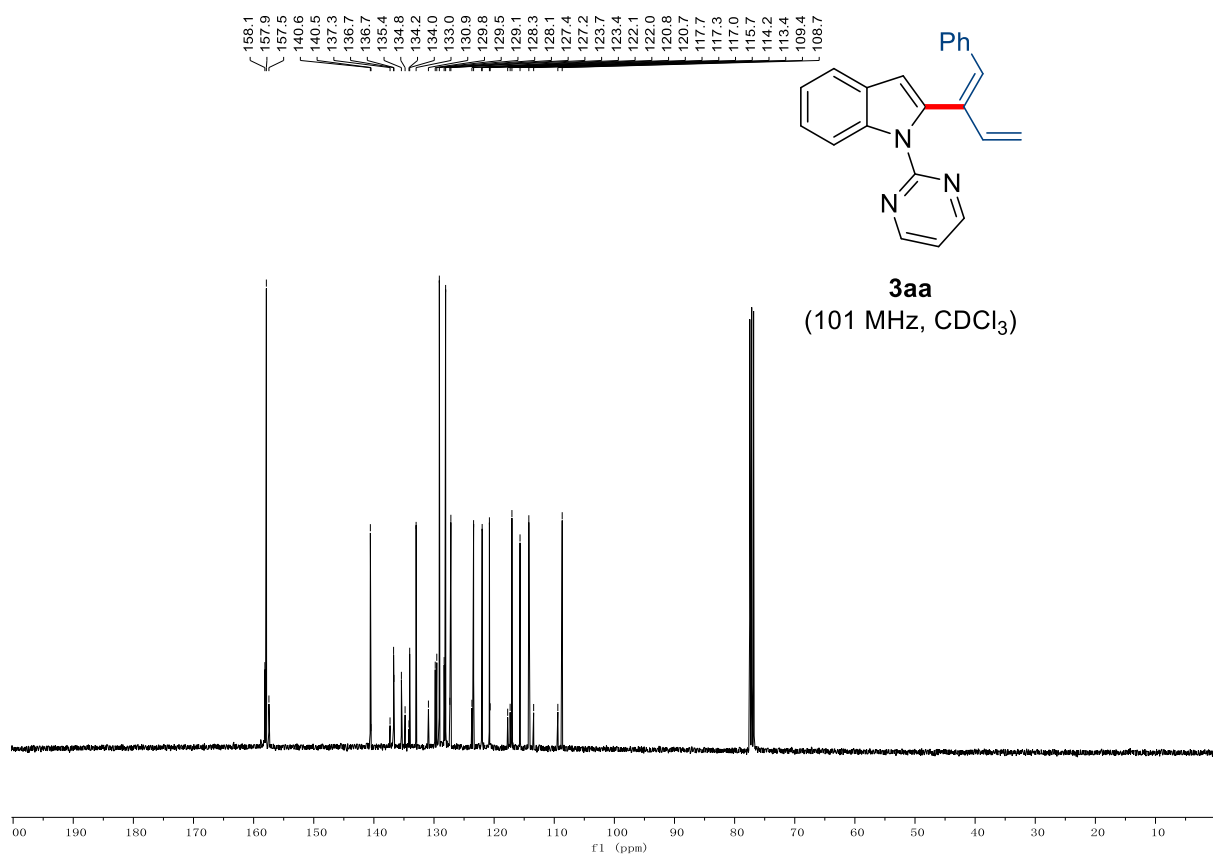

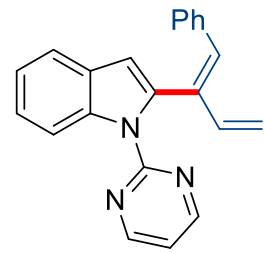

**(Z)-3aa**  
(400 MHz, CDCl<sub>3</sub>)

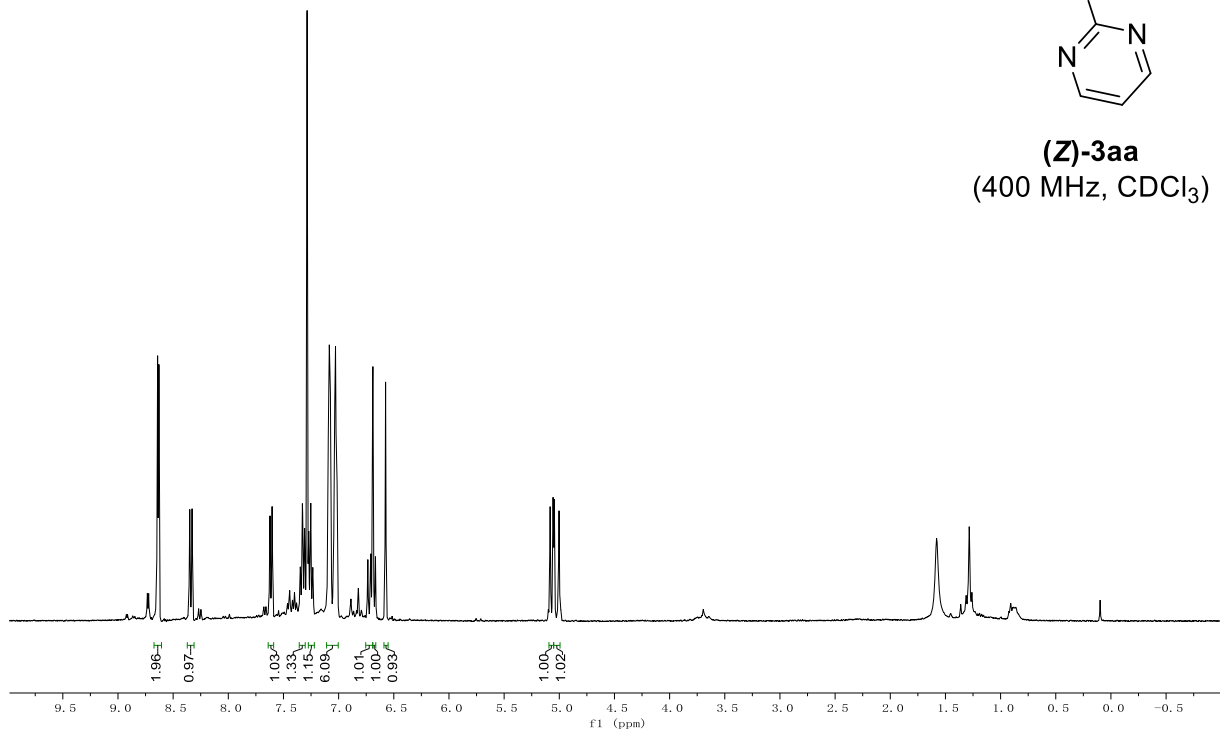

157.9  
157.5  
140.6  
136.7  
136.7  
135.4  
134.1  
133.0  
129.8  
129.6  
129.1  
128.1  
127.2  
123.4  
122.0  
120.8  
117.1  
115.7  
114.2  
108.7

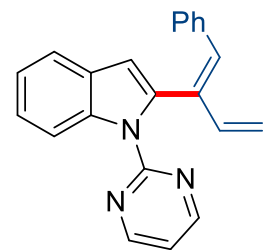

**(Z)-3aa**  
(101 MHz, CDCl<sub>3</sub>)

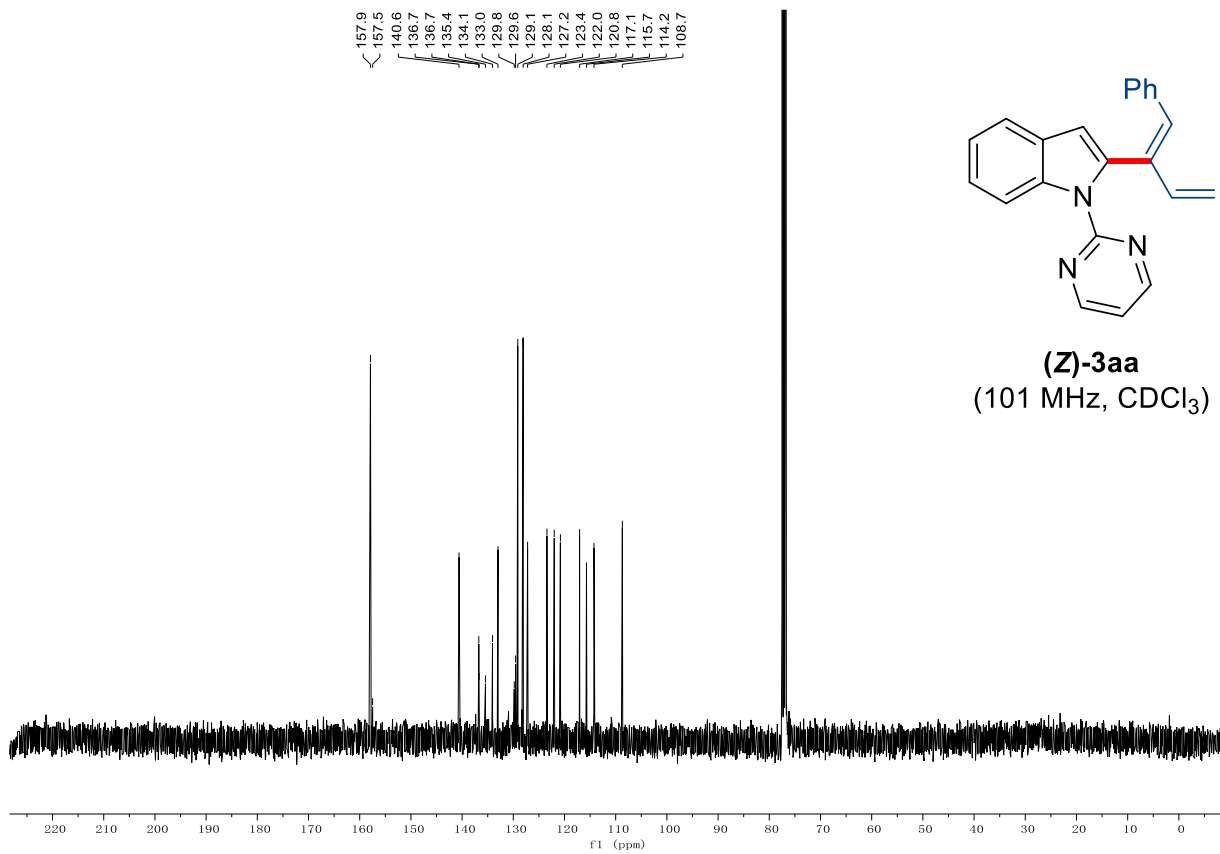



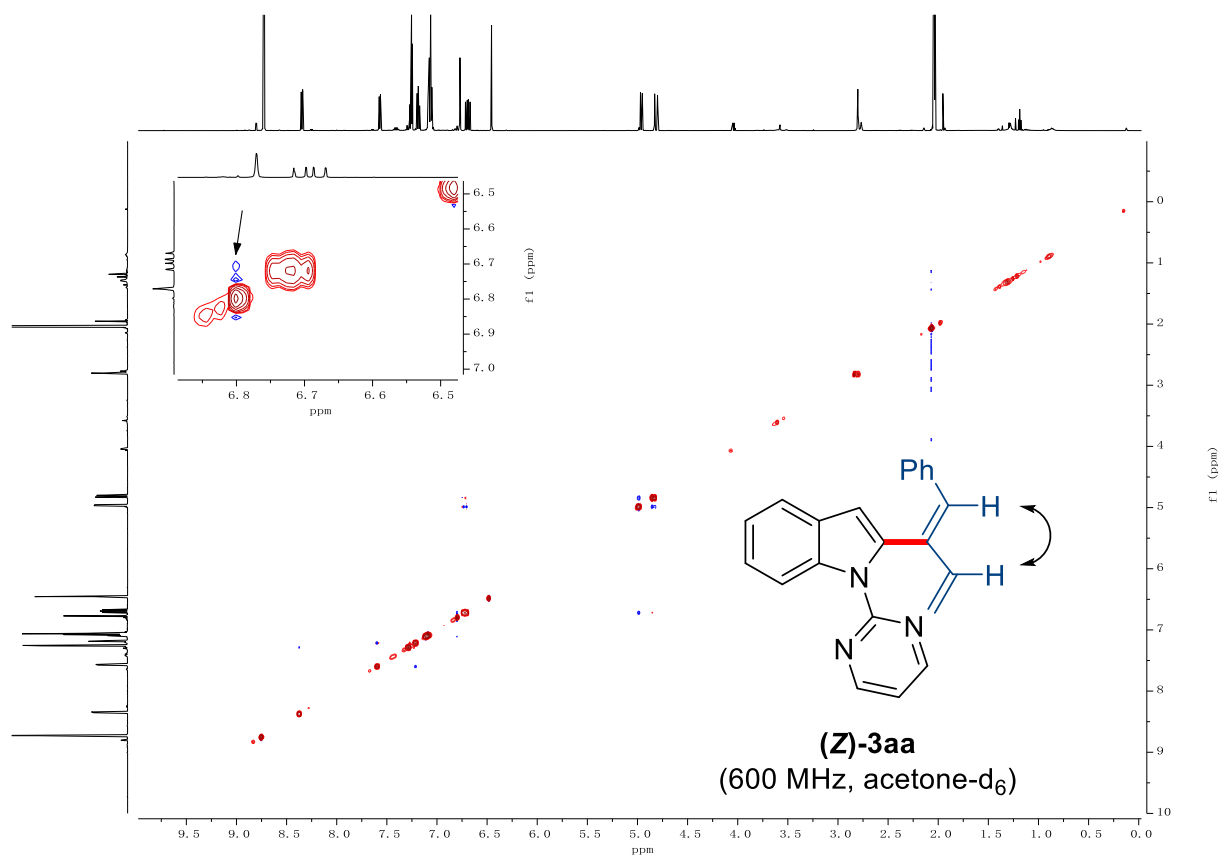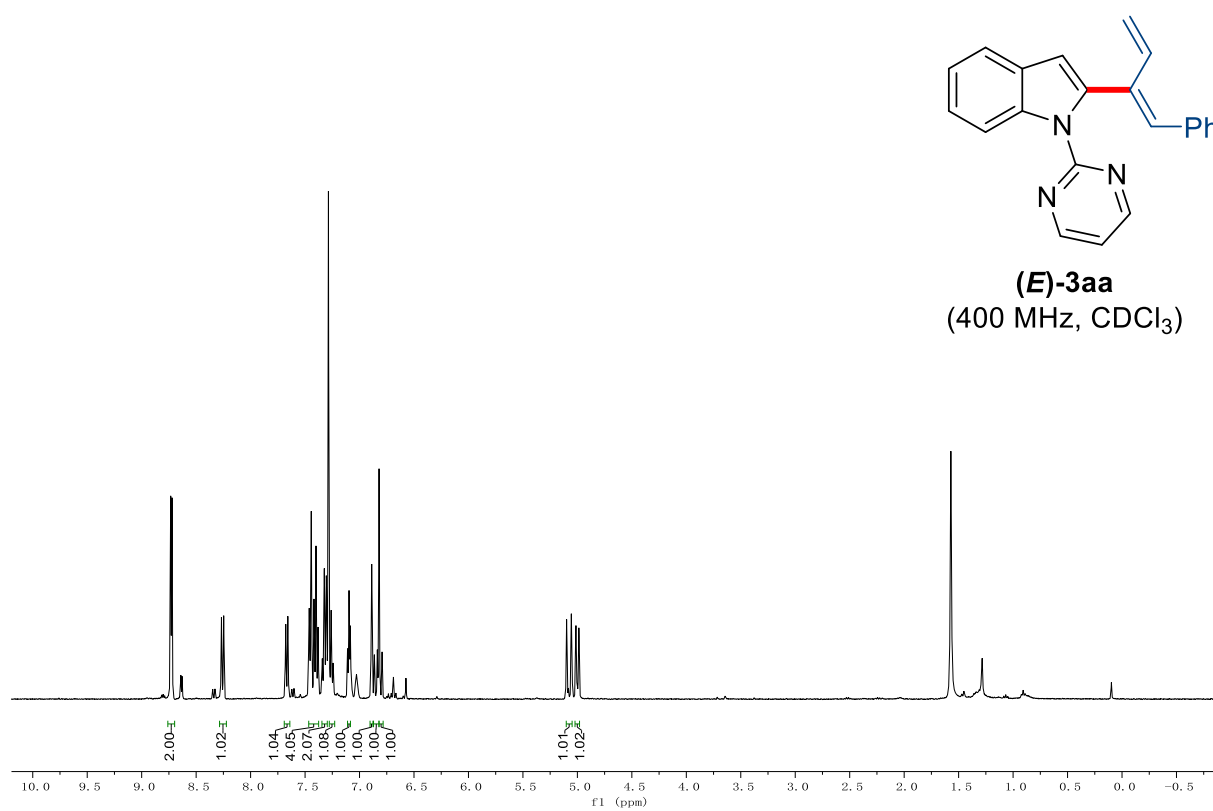

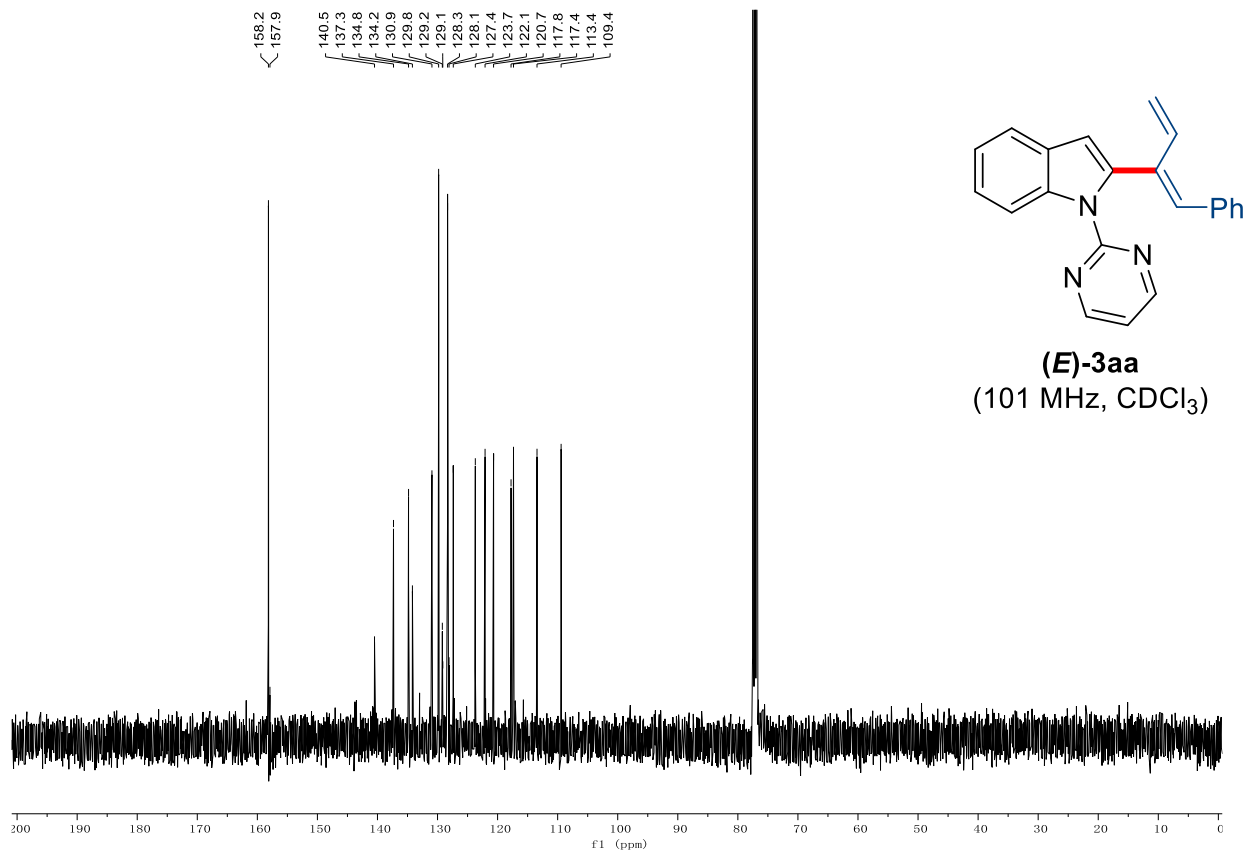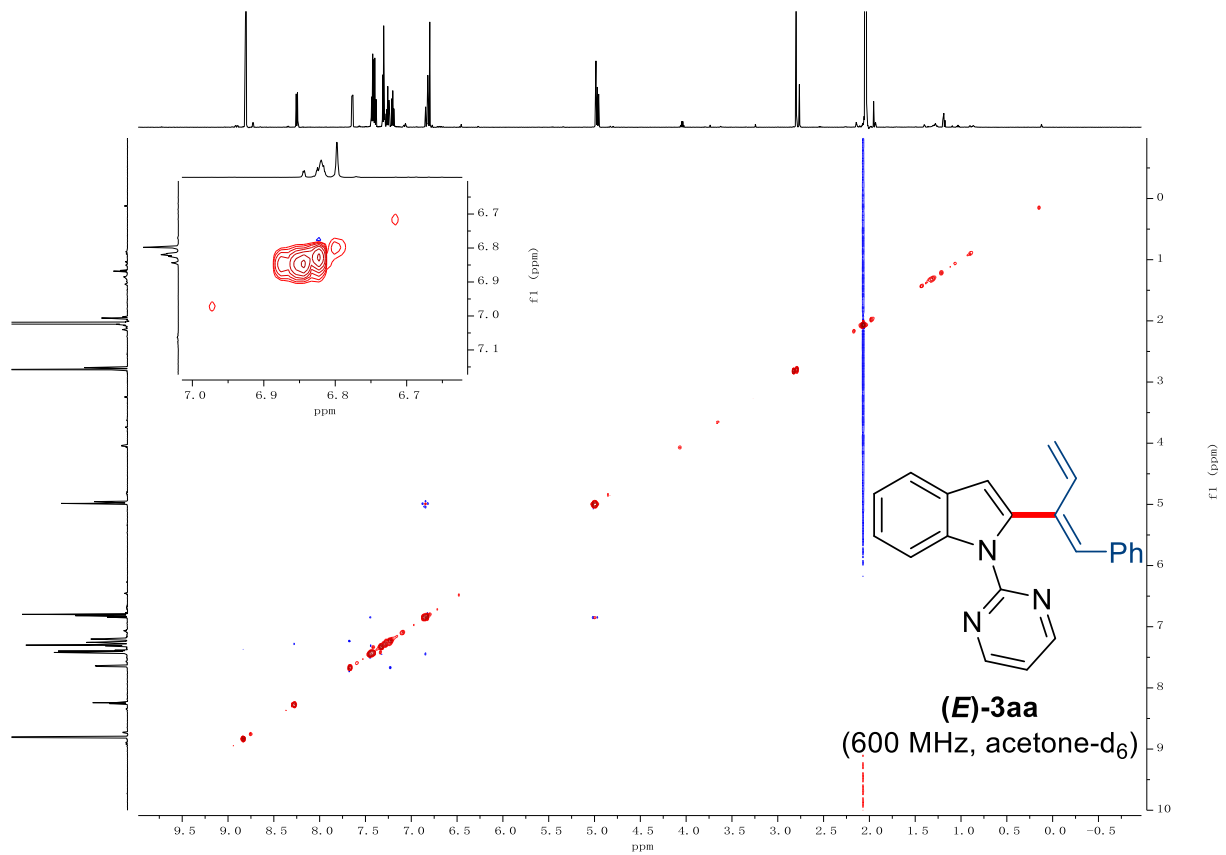

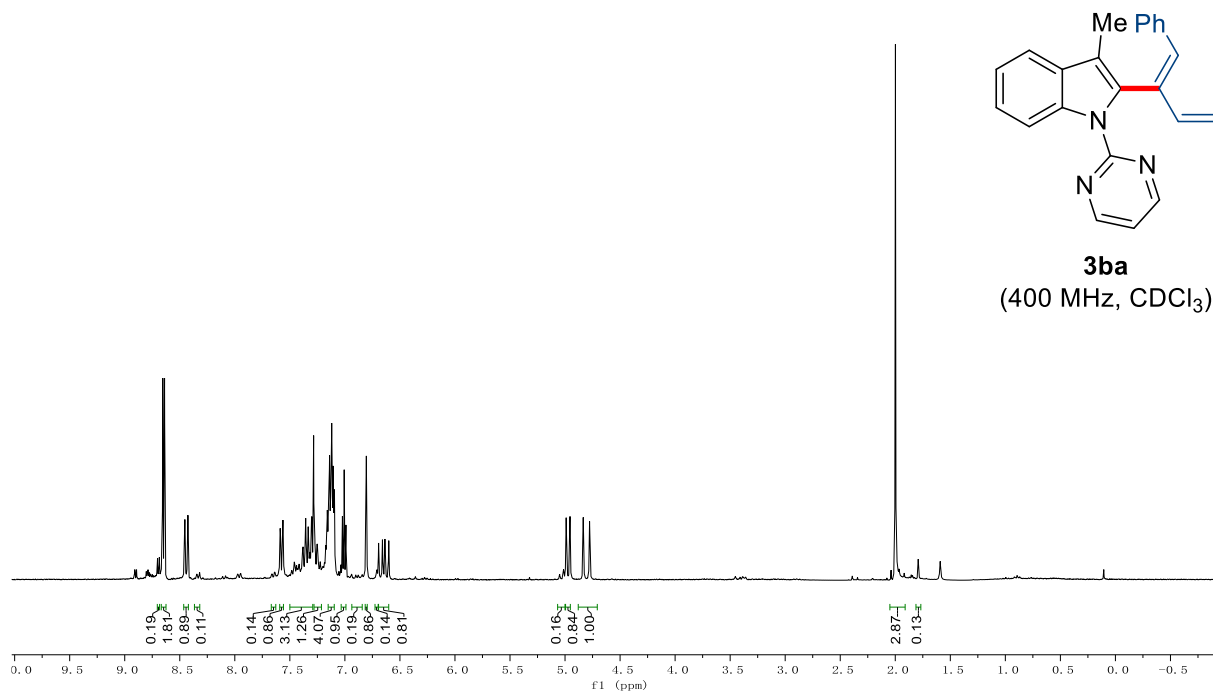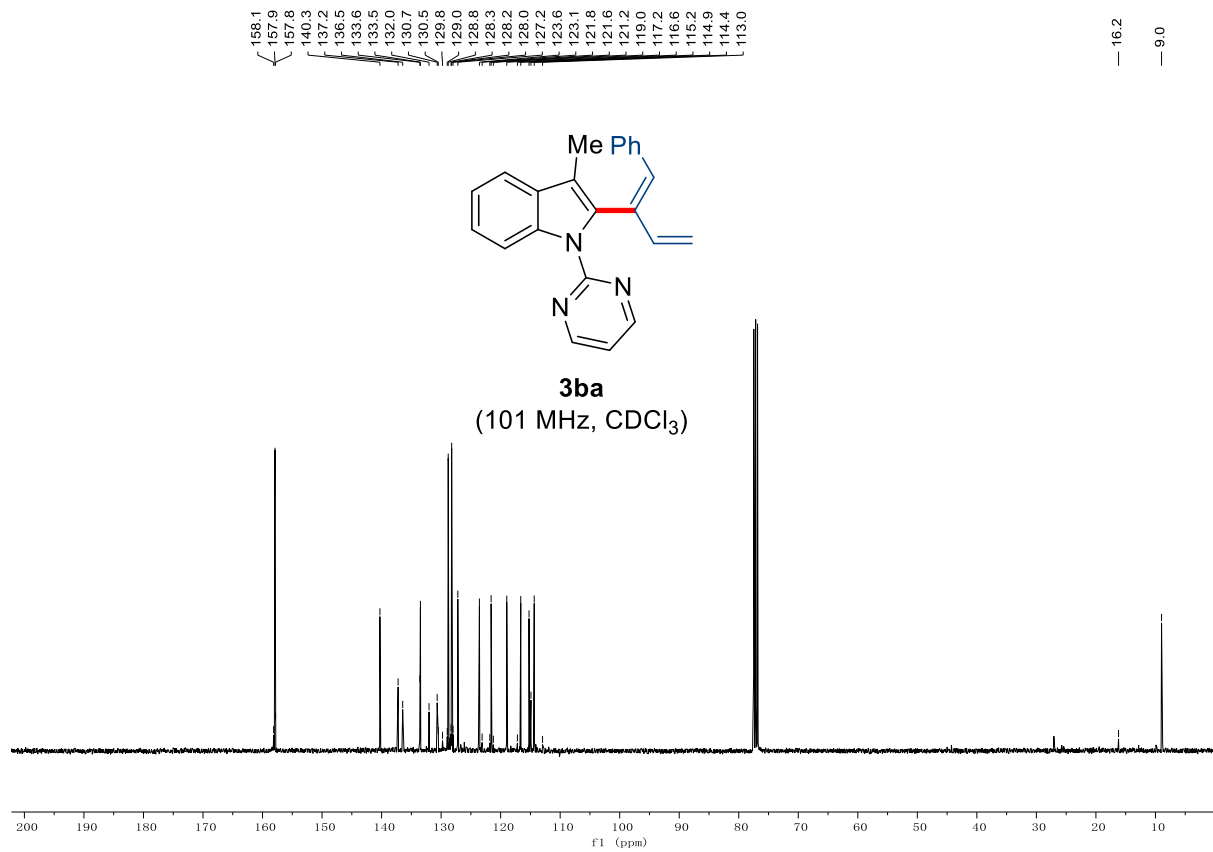

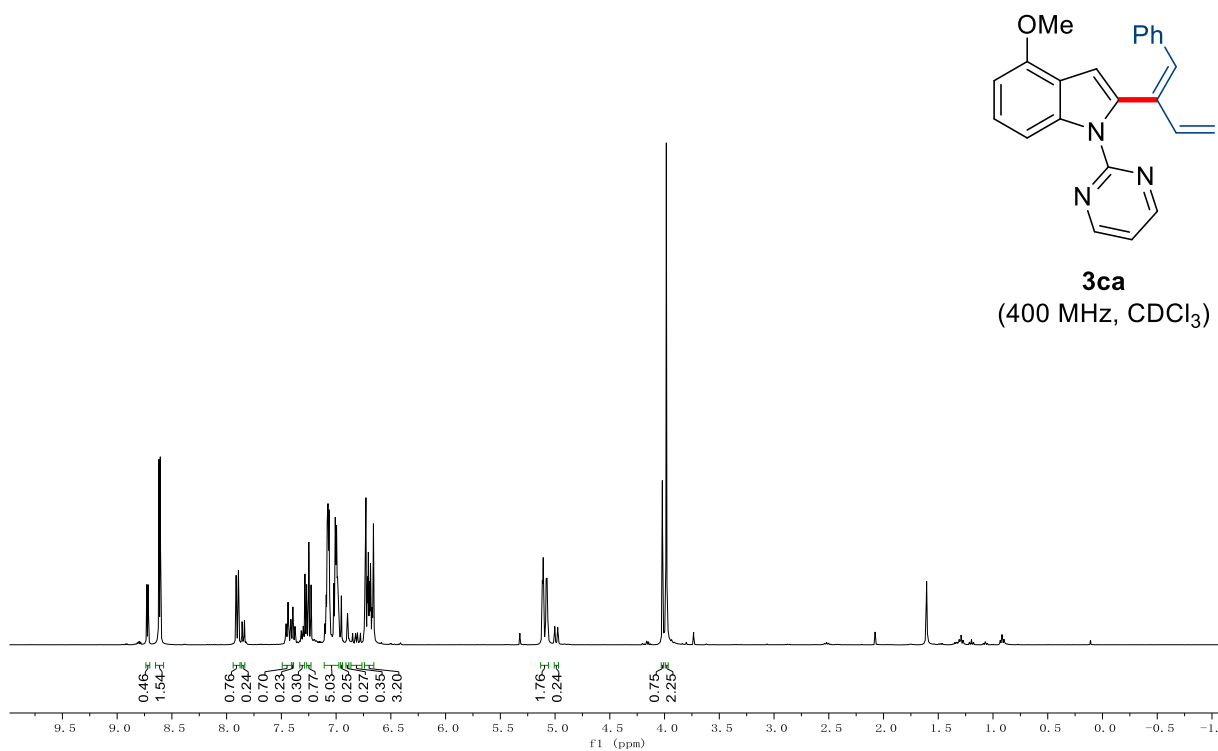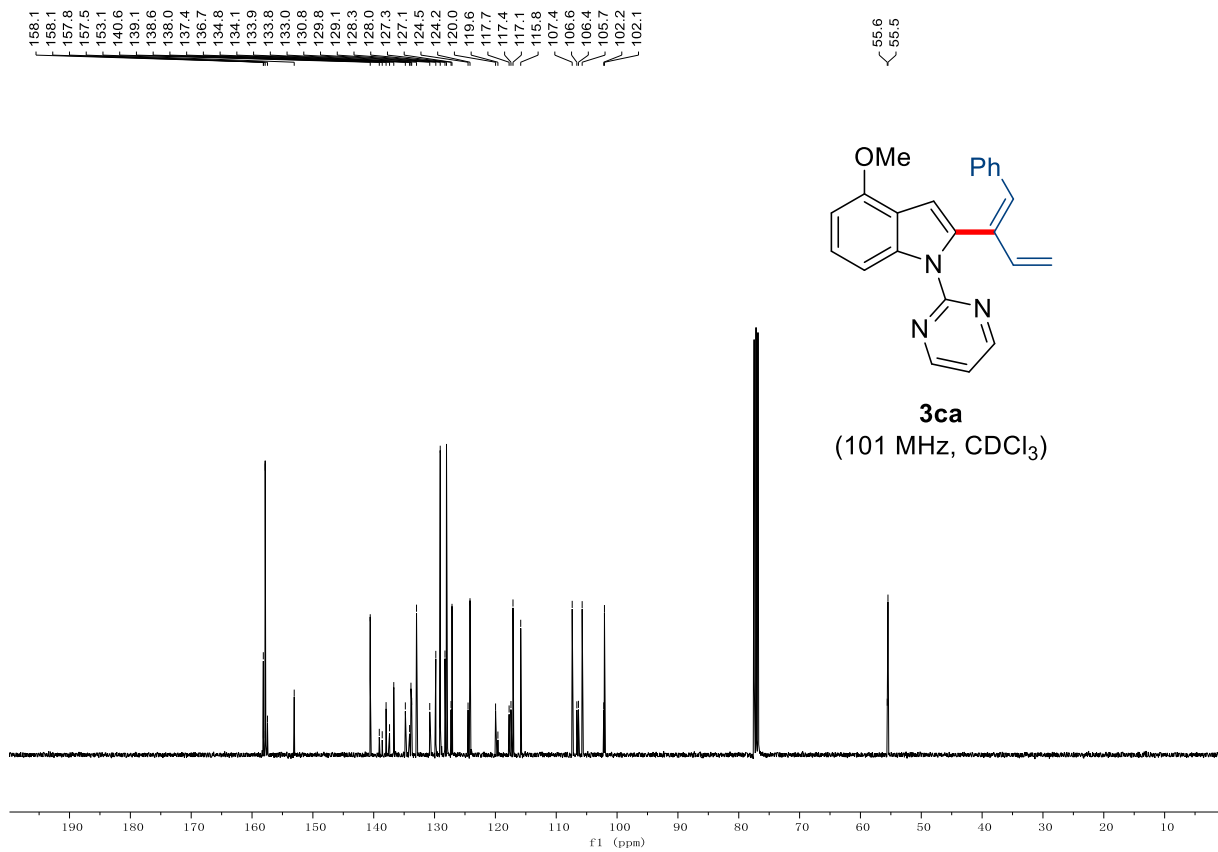

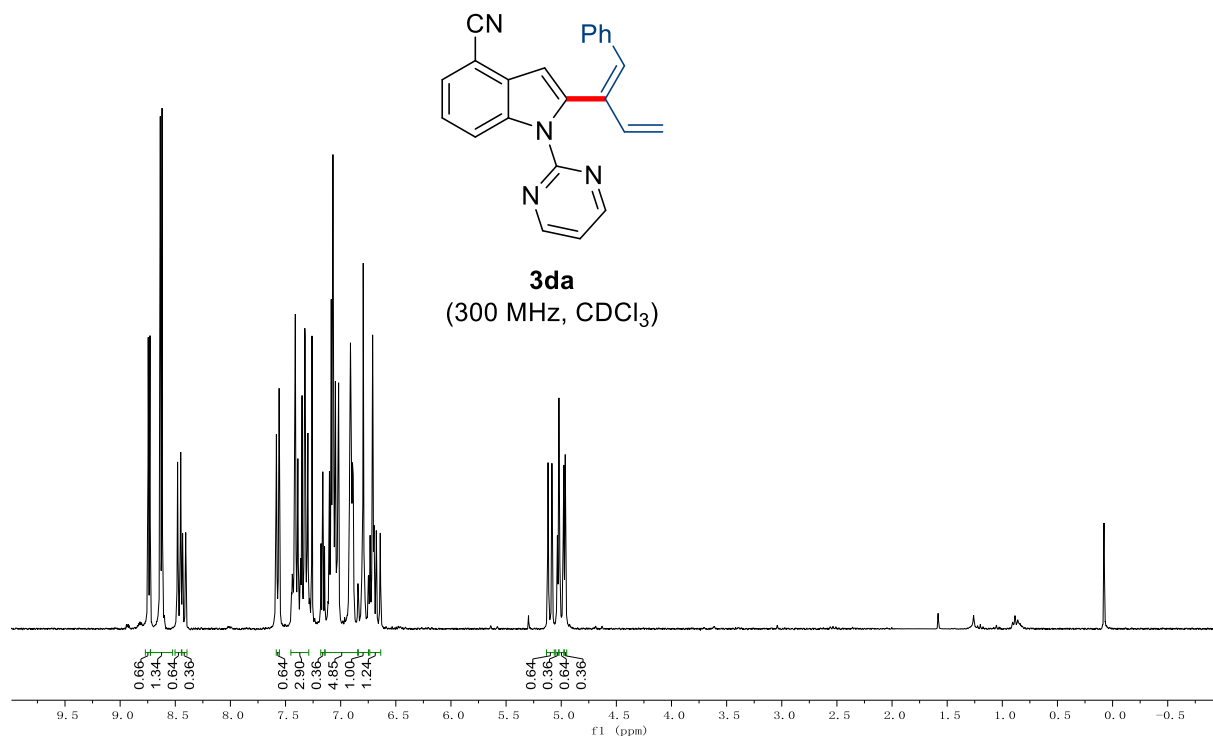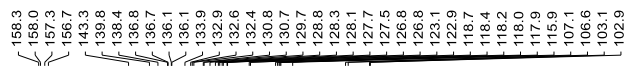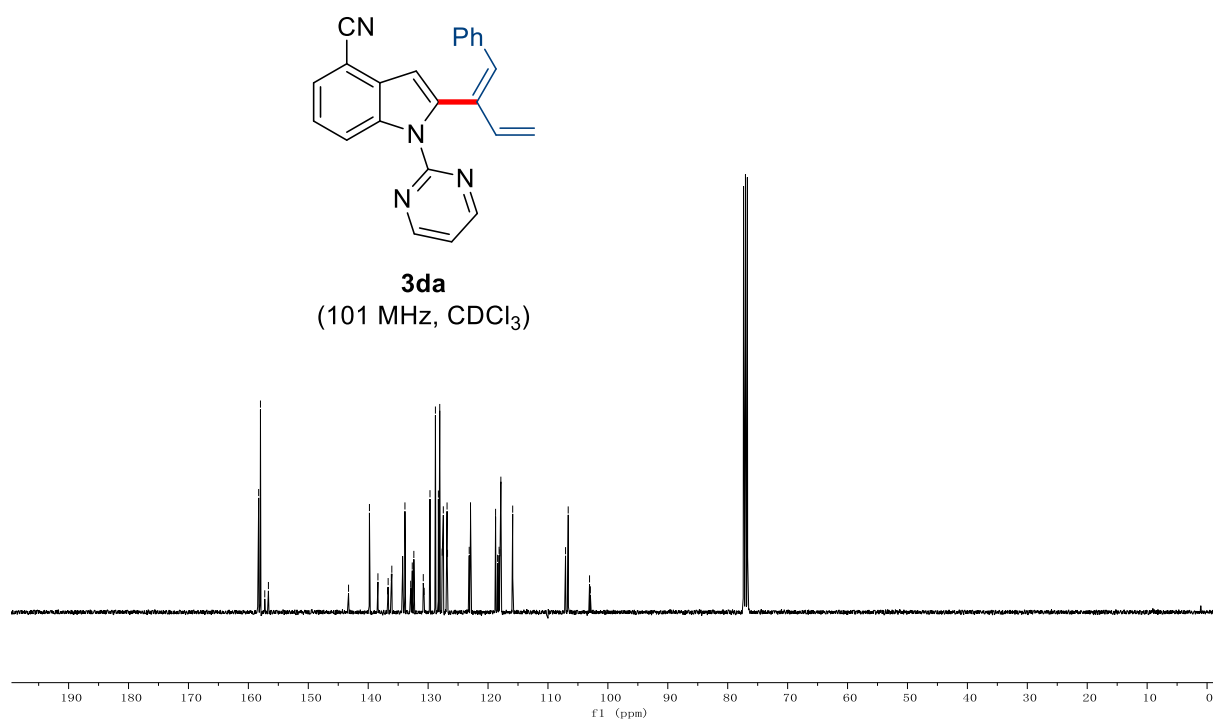

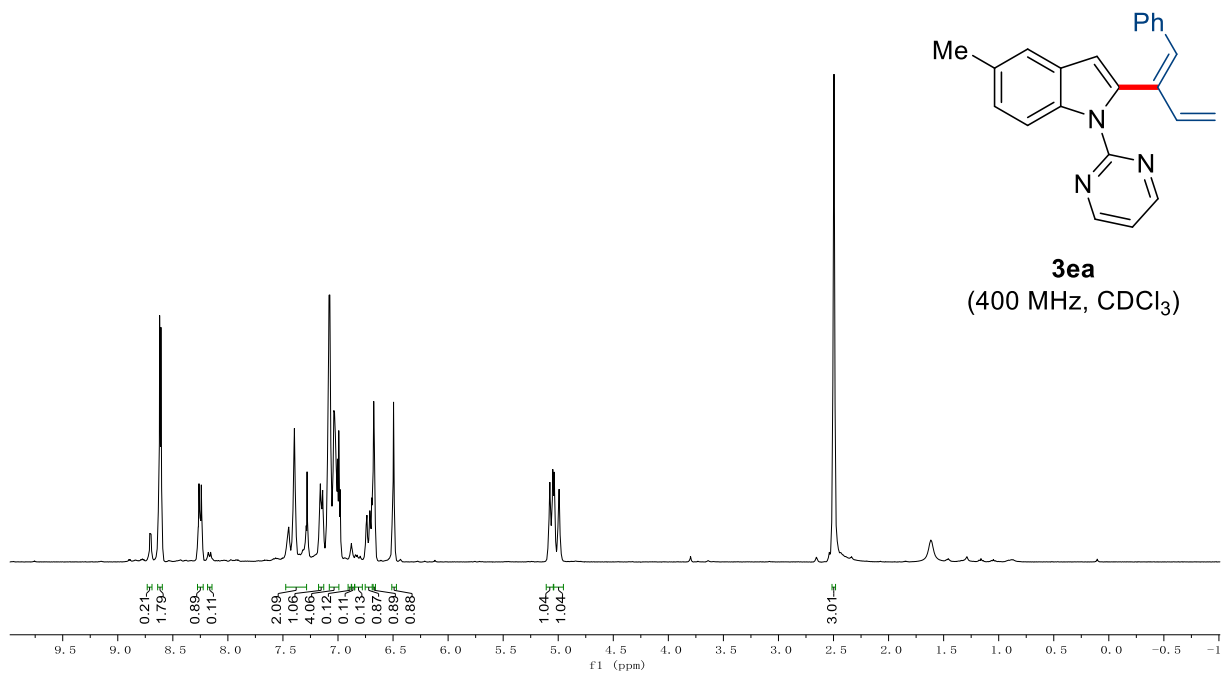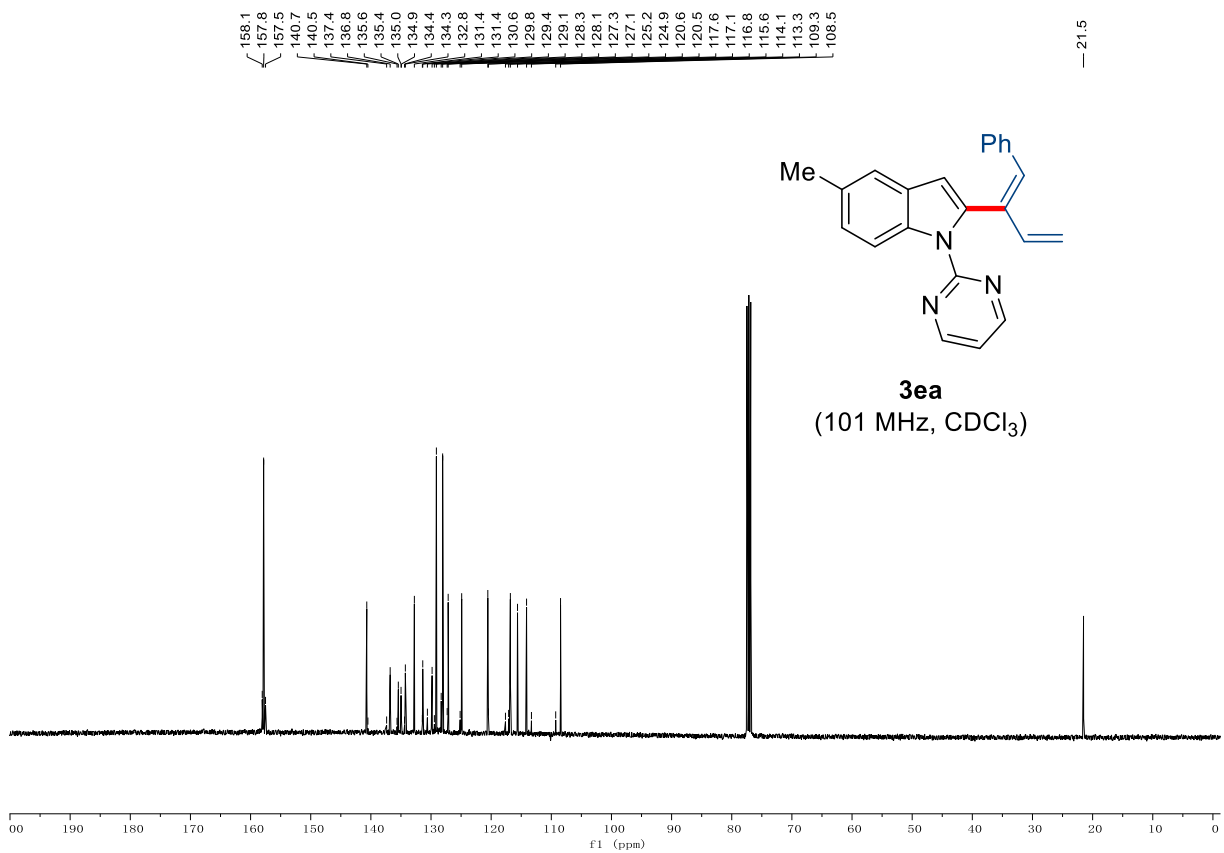

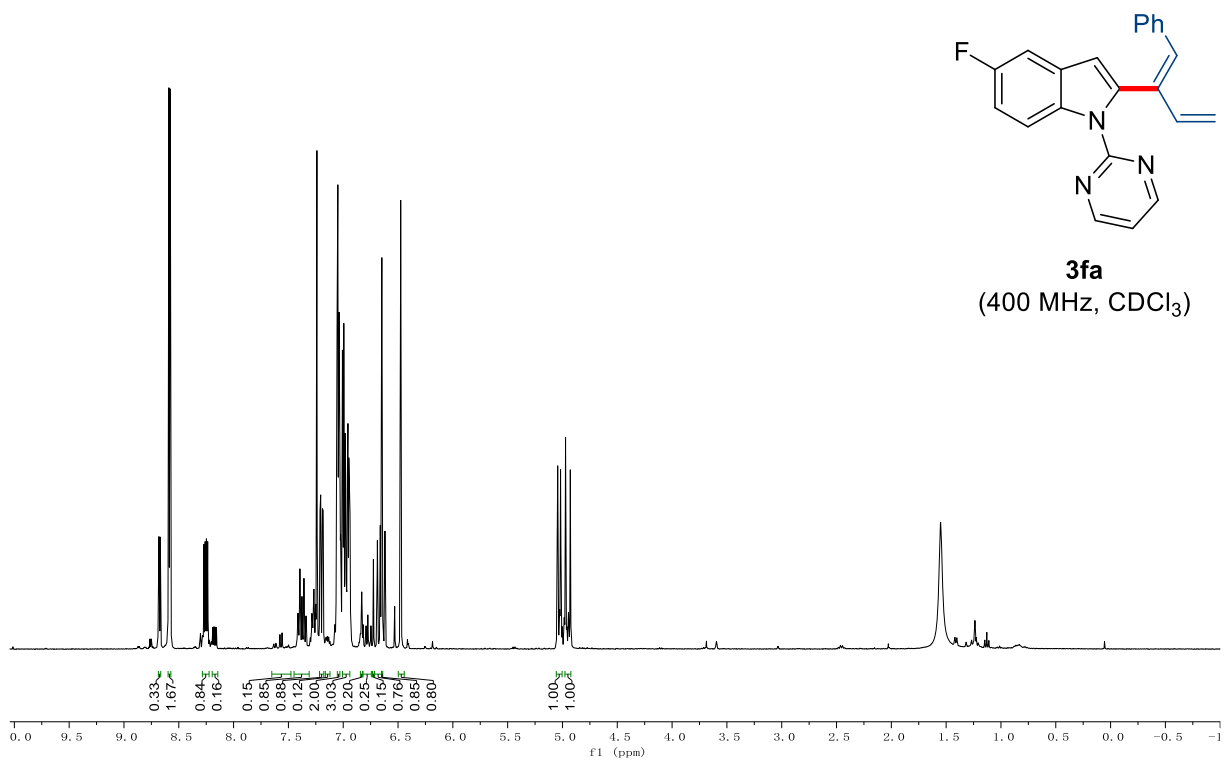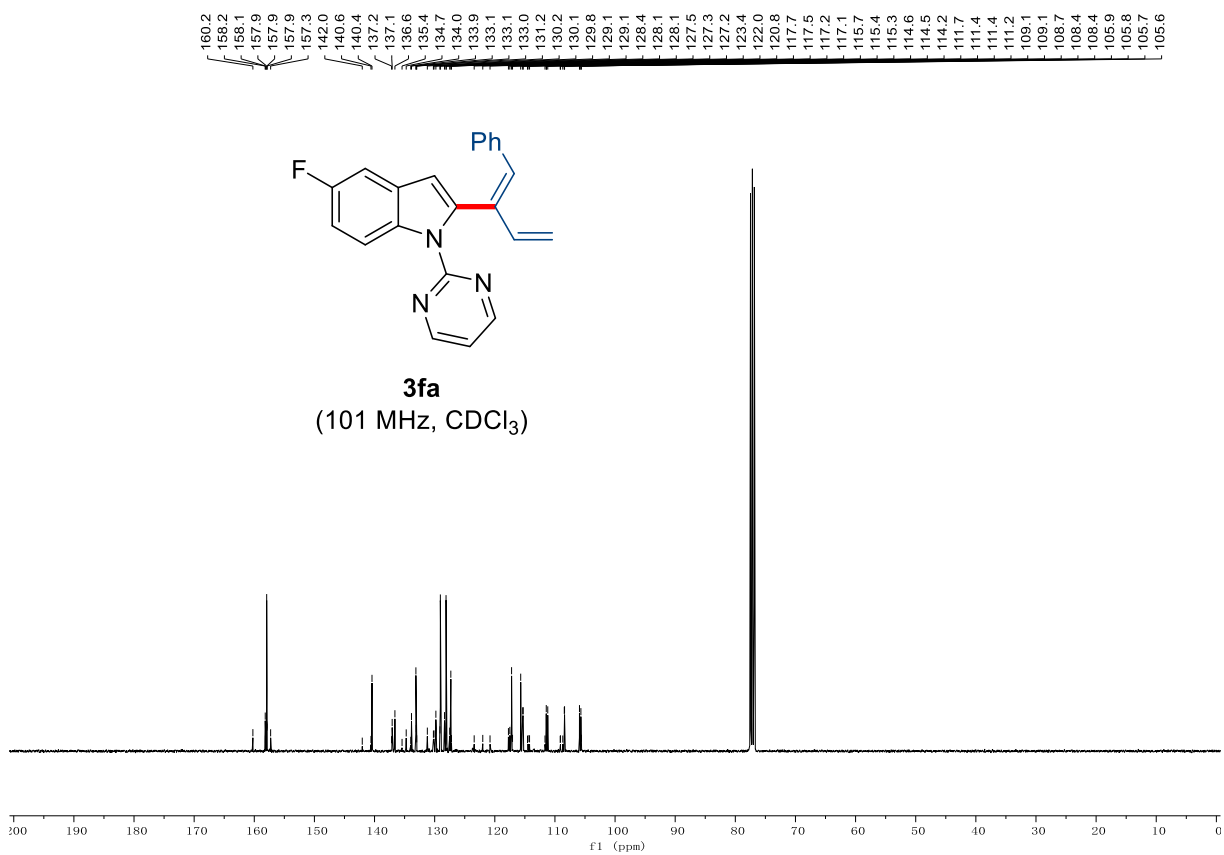

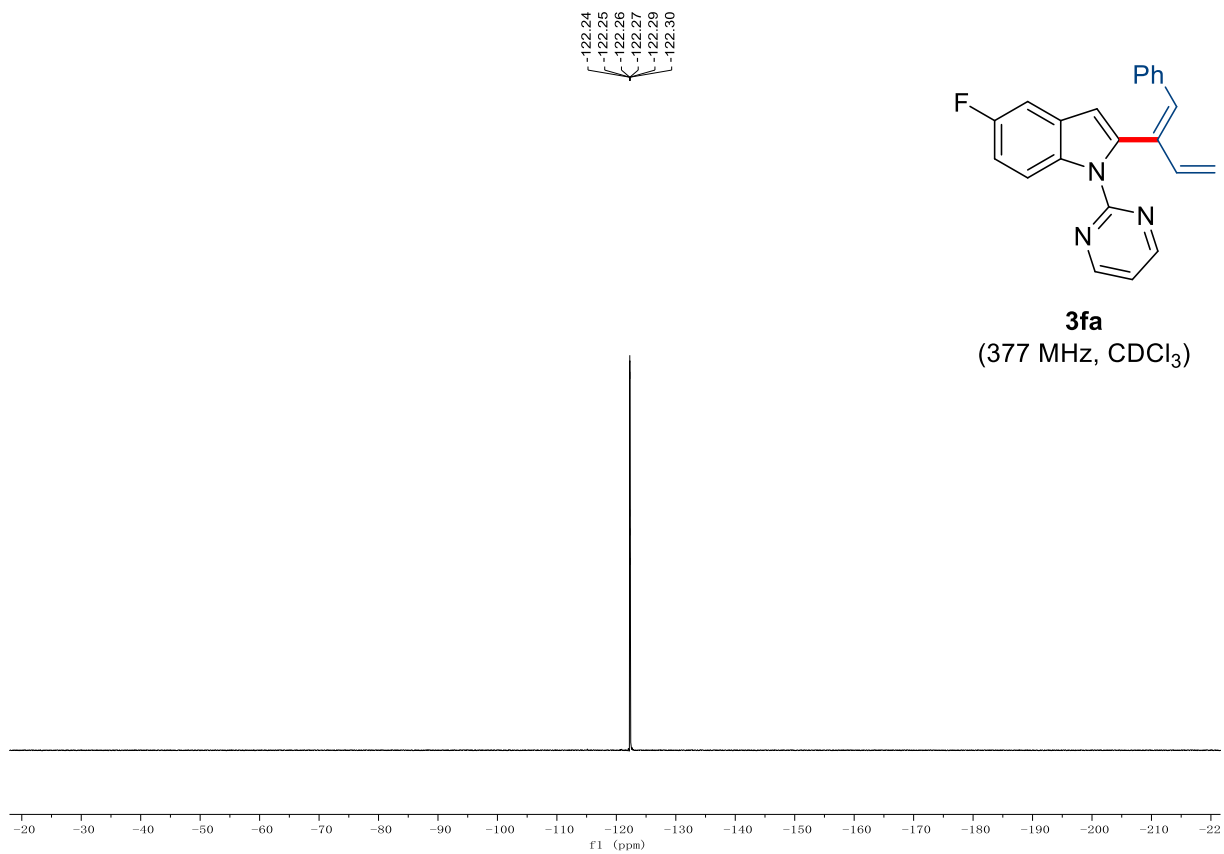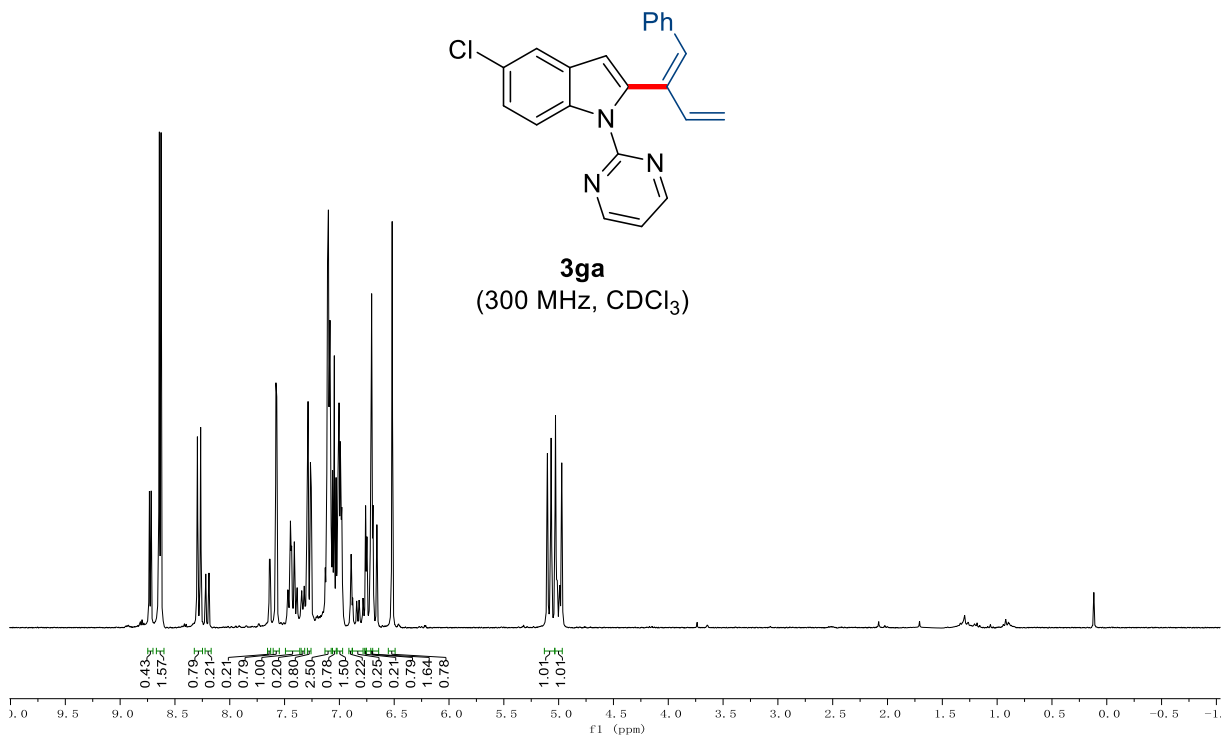



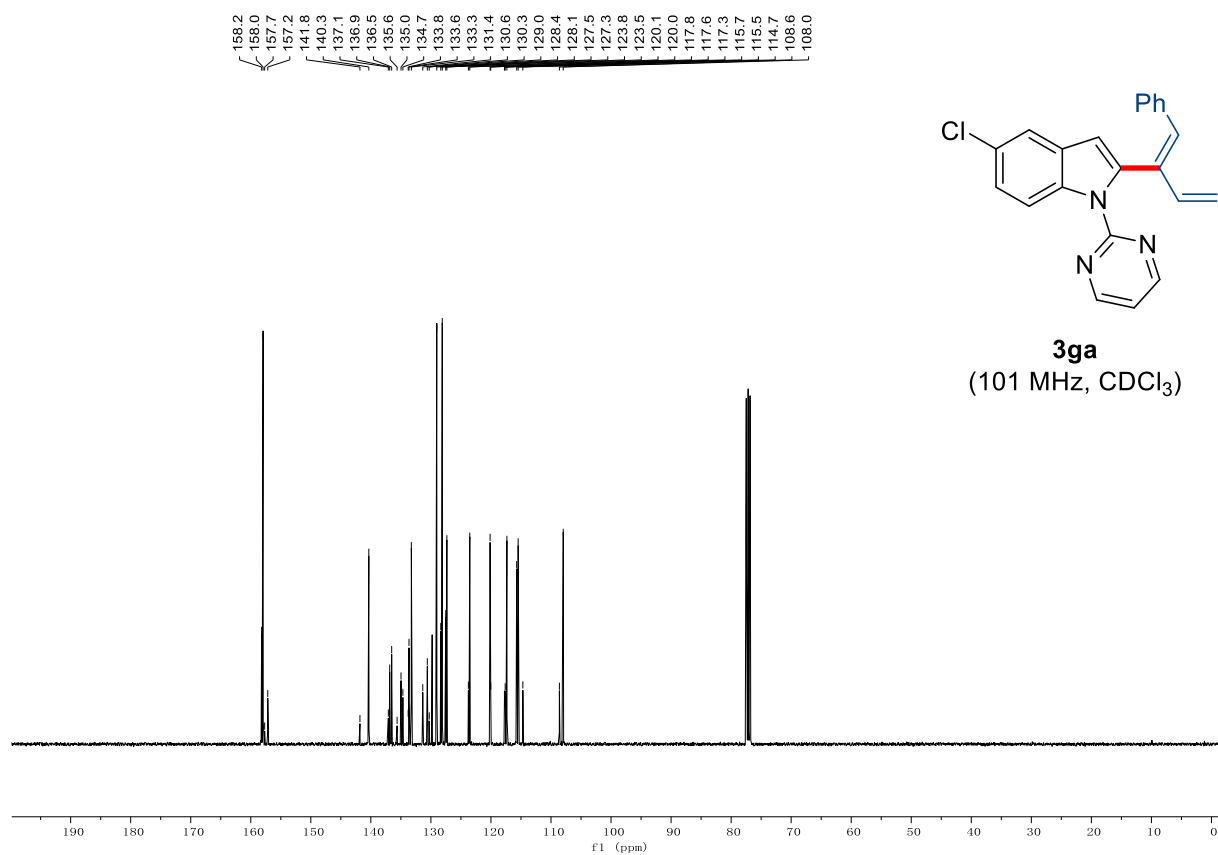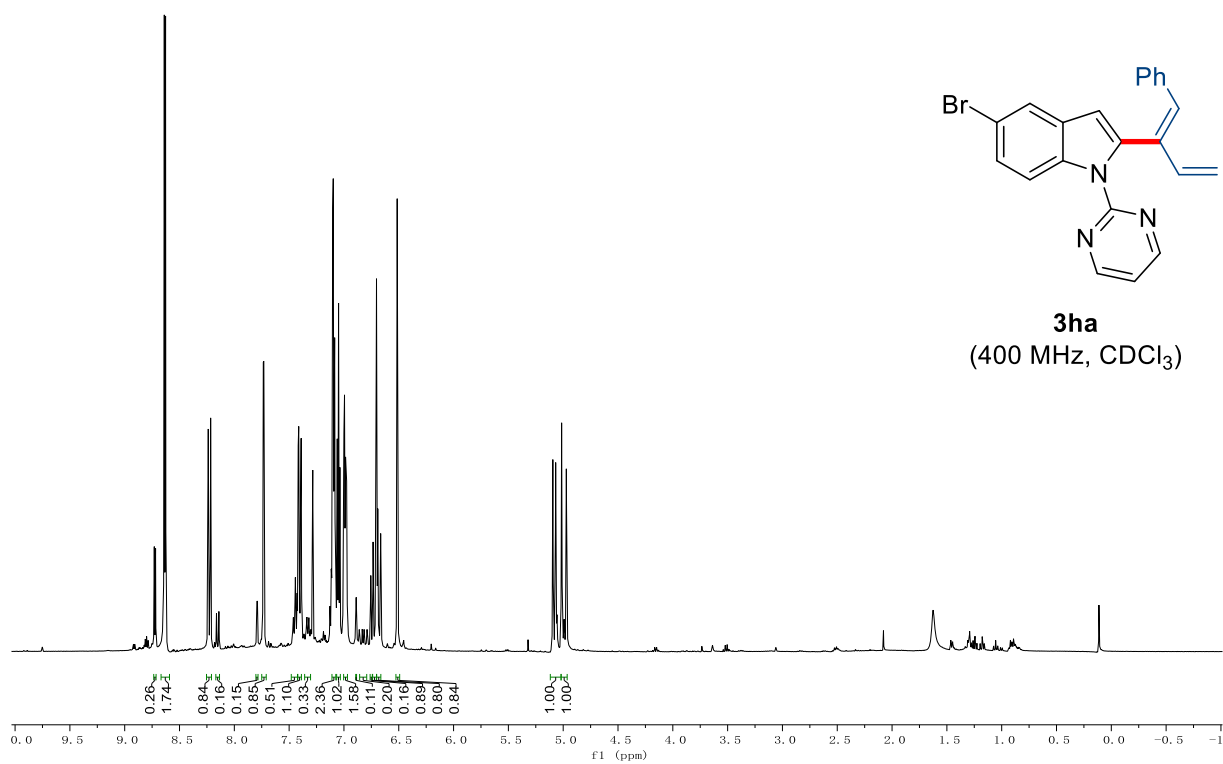

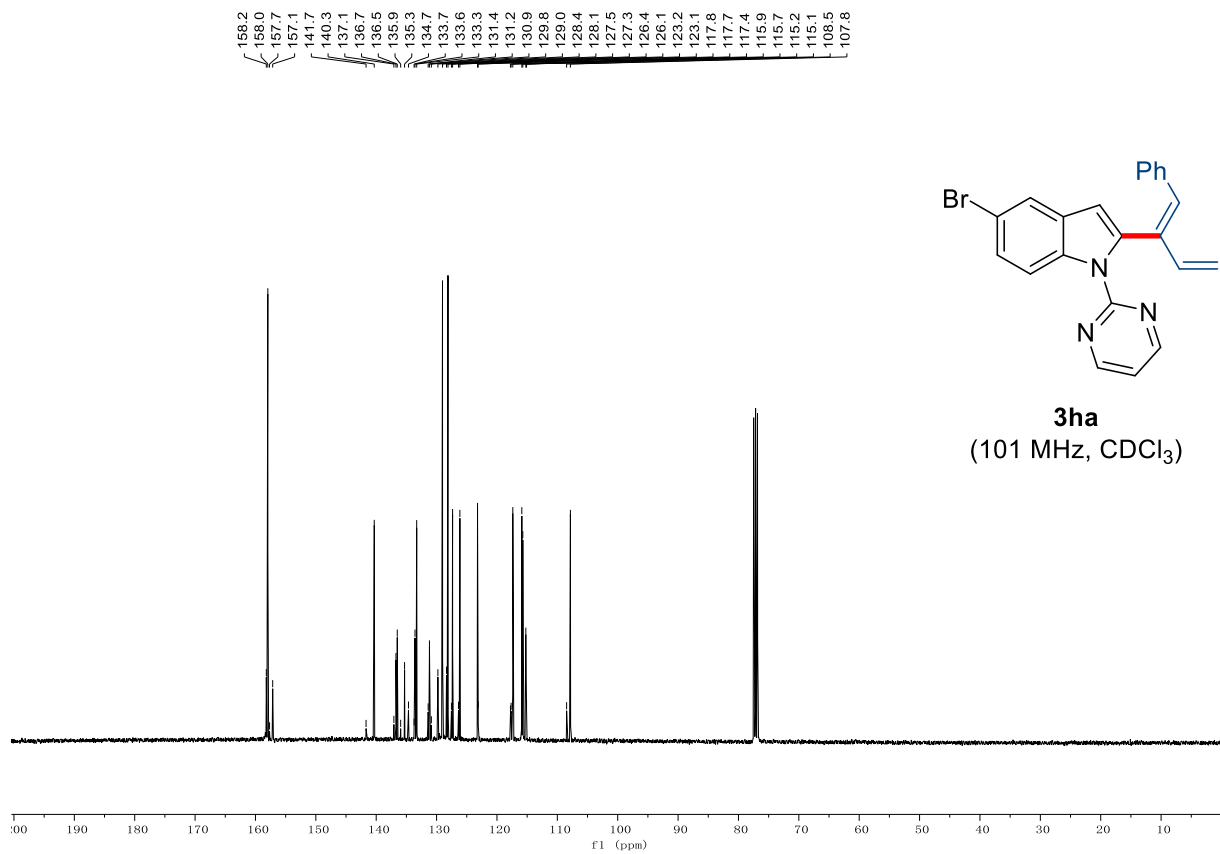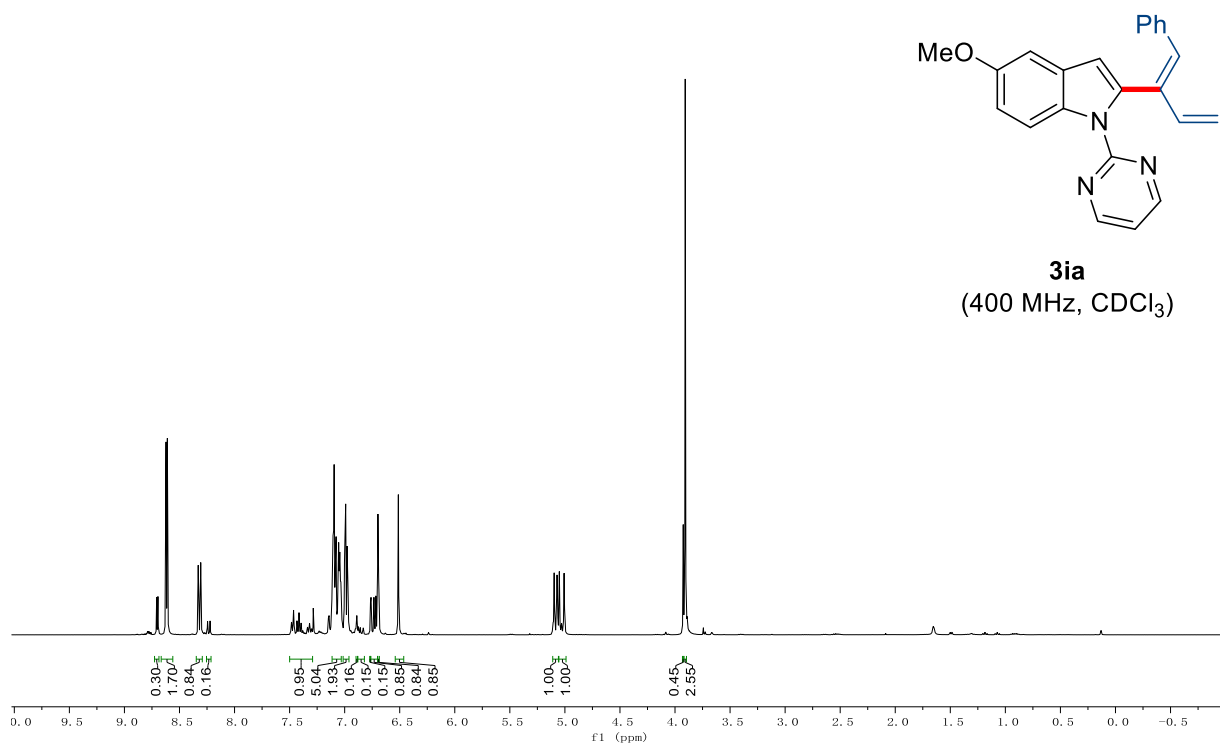

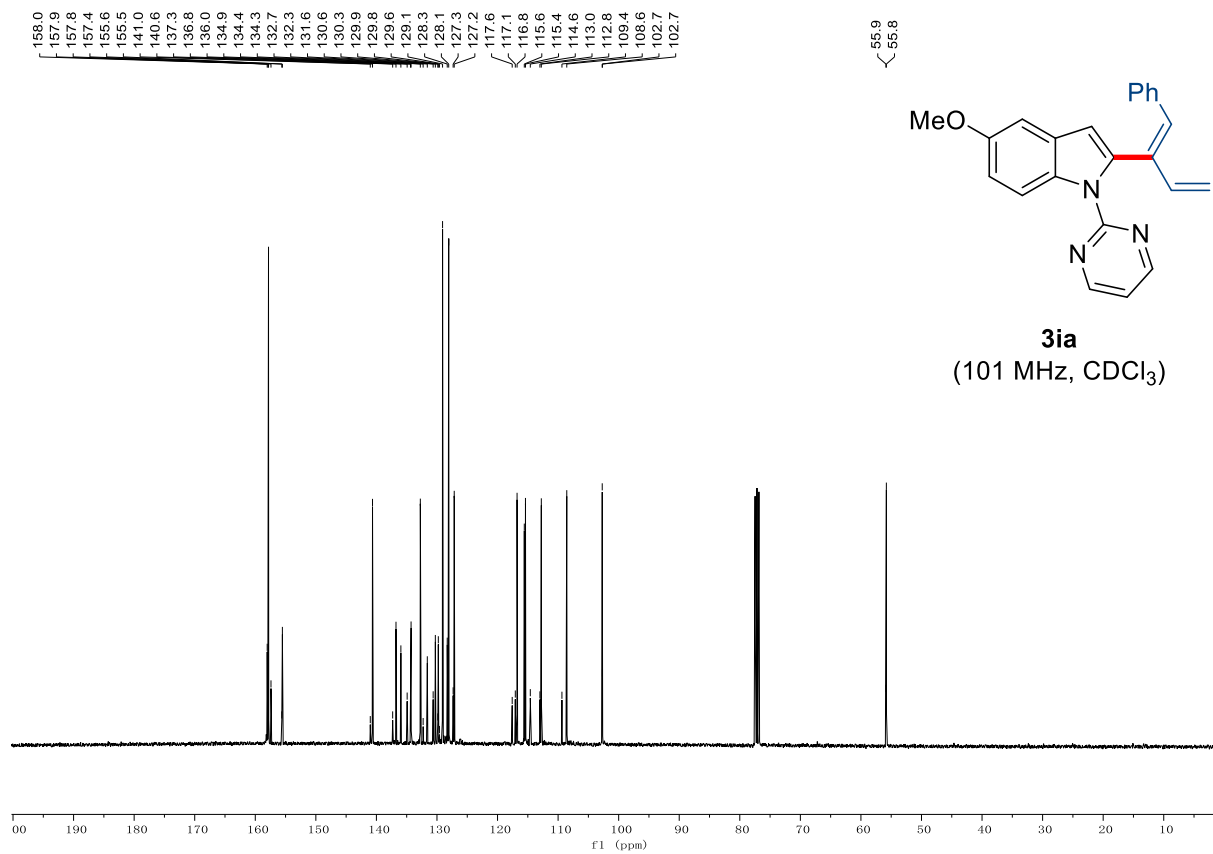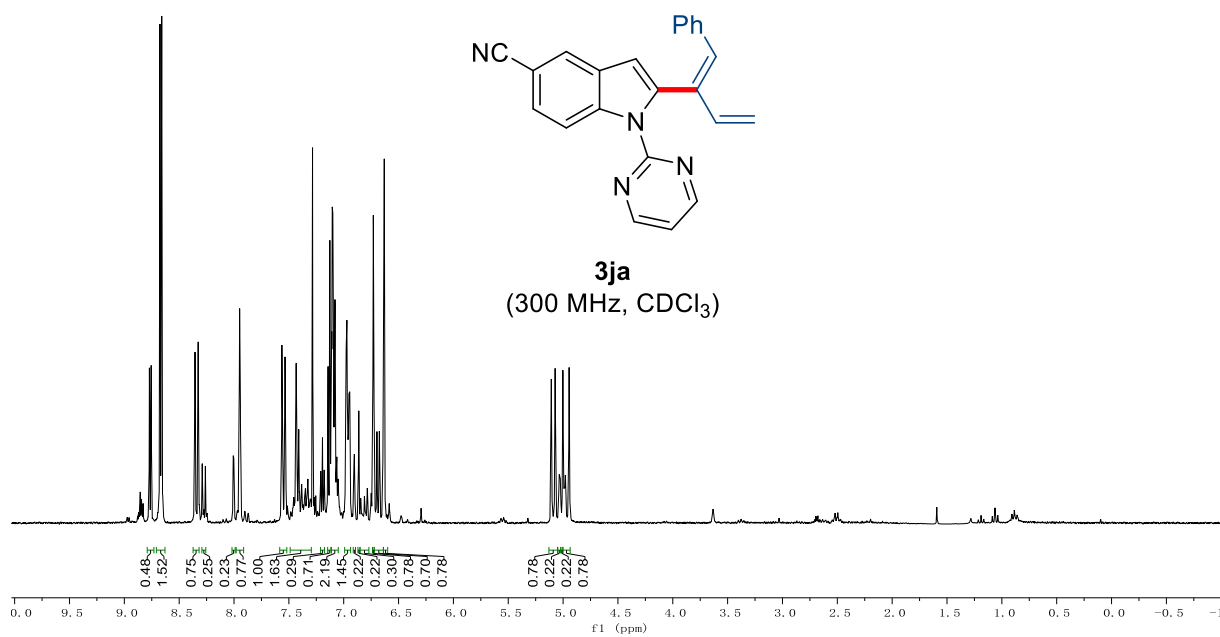

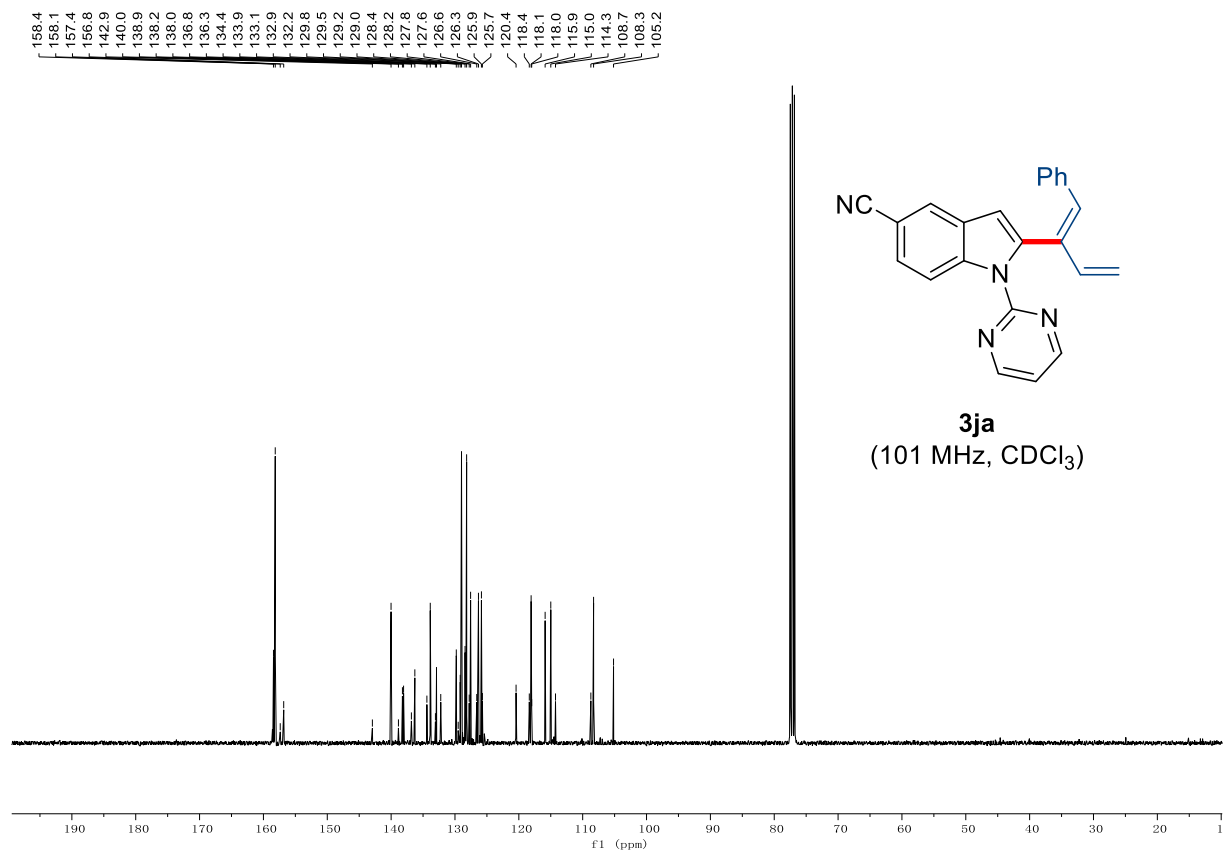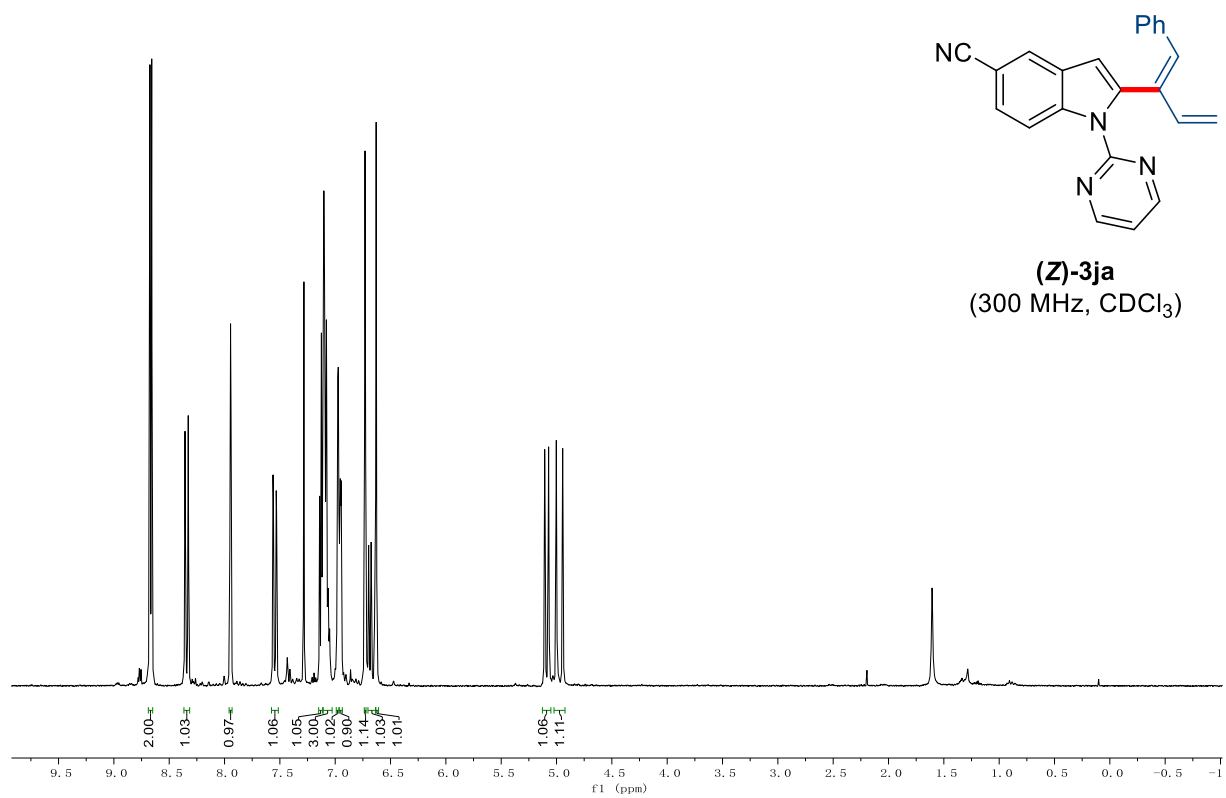

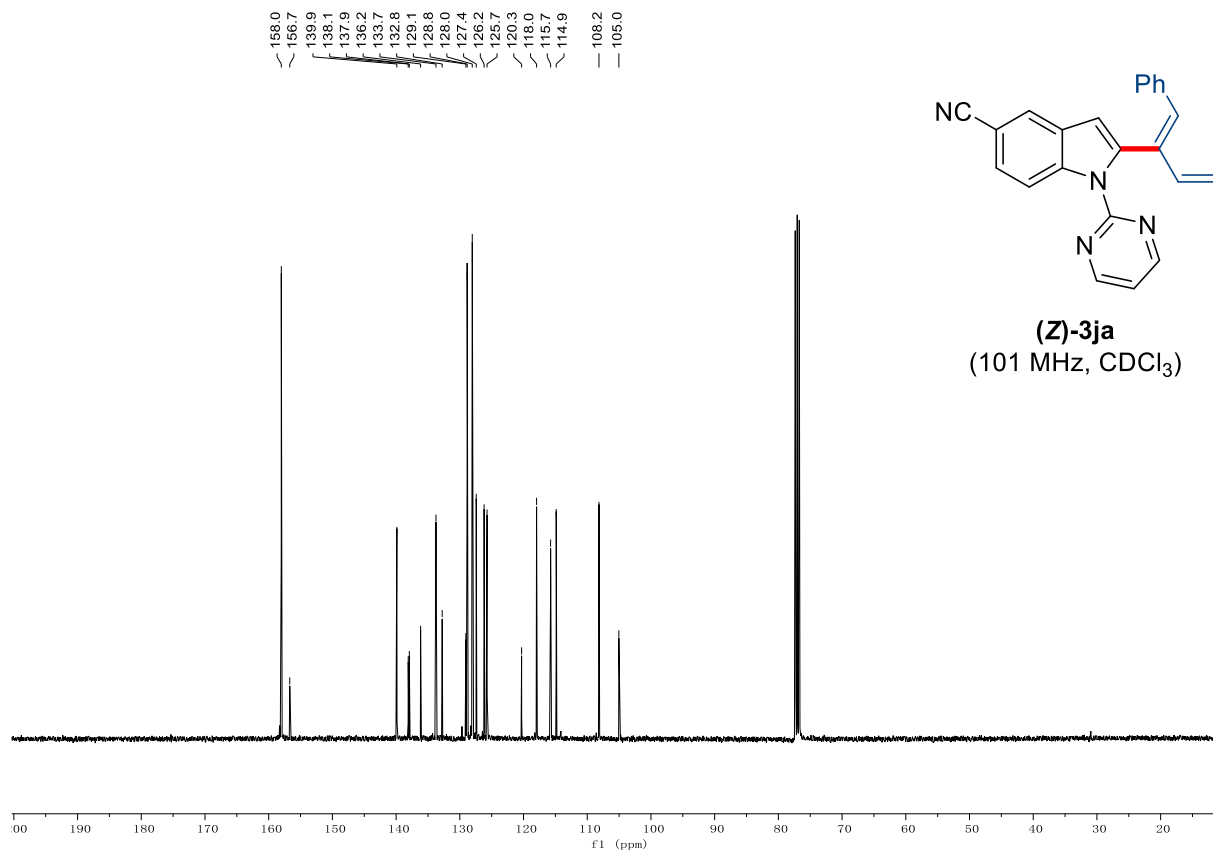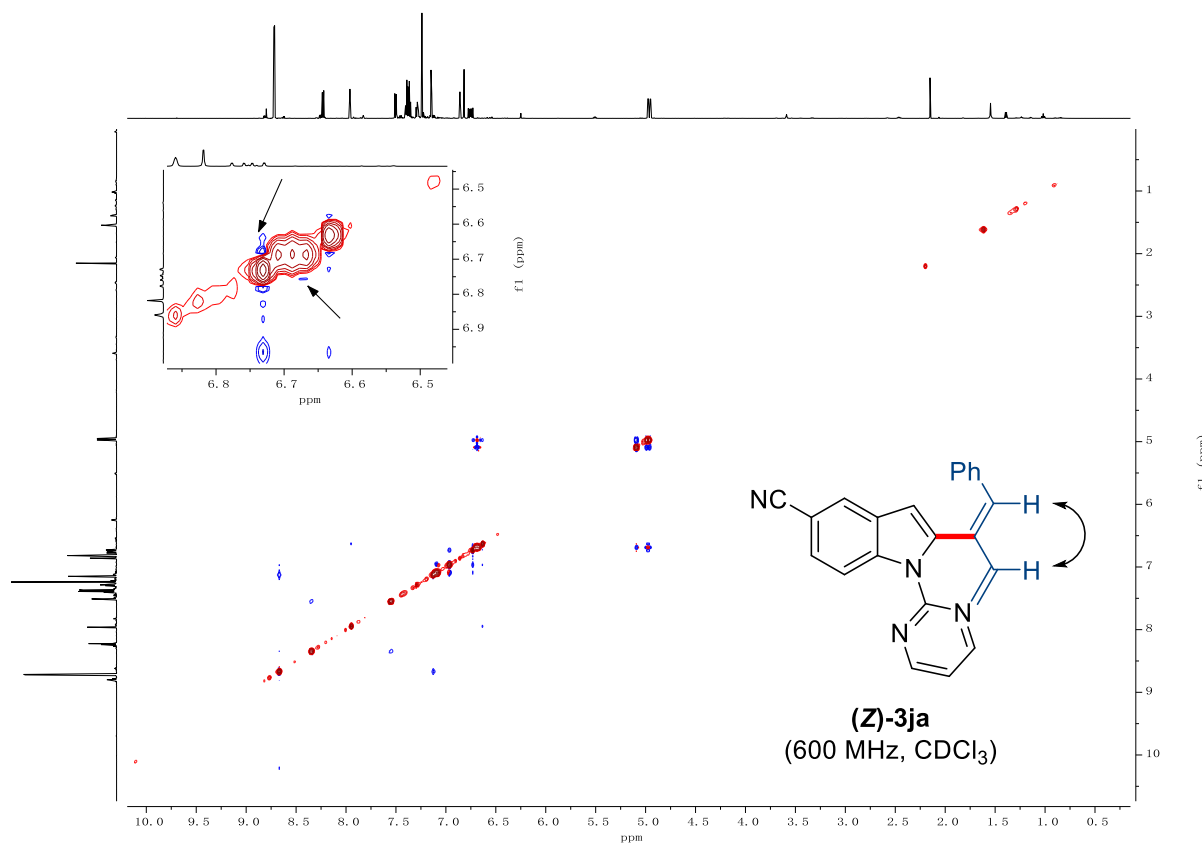

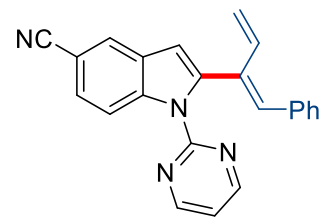

**(E)-3ja**  
(300 MHz, CDCl<sub>3</sub>)

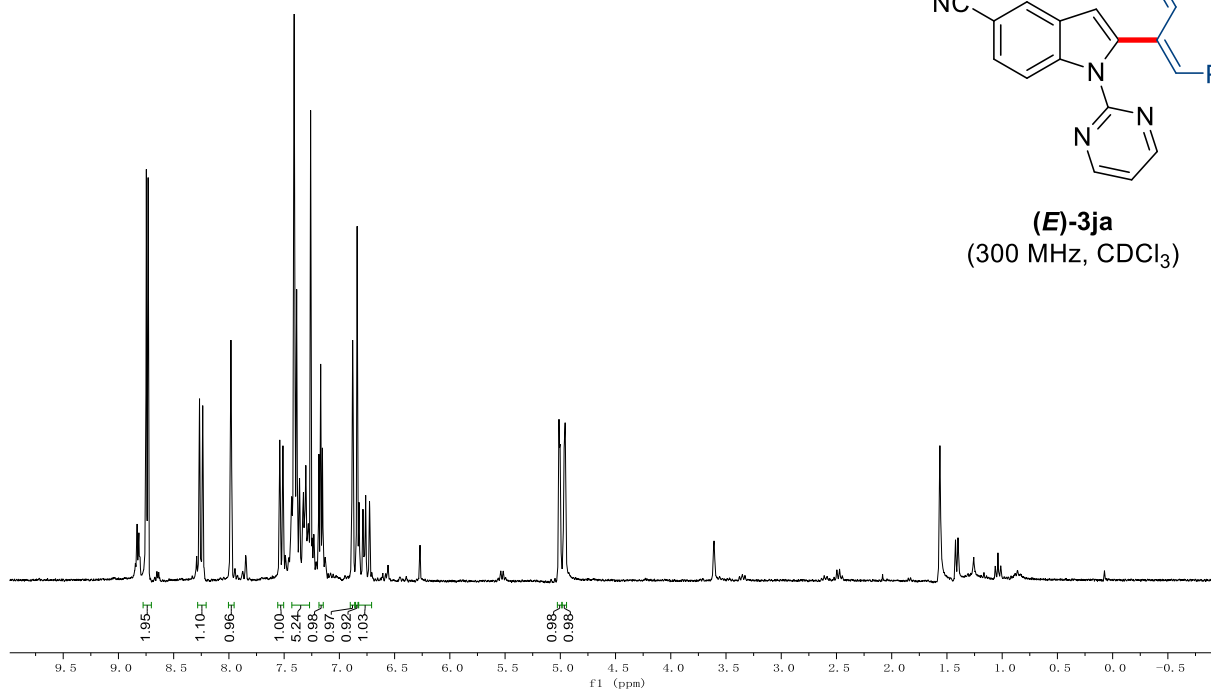

158.4  
157.4  
142.9  
138.9  
136.8  
134.4  
133.1  
132.2  
129.8  
129.0  
128.4  
127.8  
126.6  
125.7  
120.5  
118.4  
118.0  
114.3  
108.7  
105.2

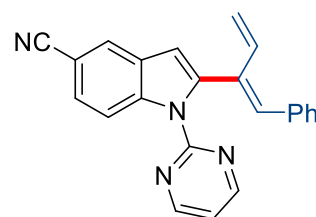

**(E)-3ja**  
(101 MHz, CDCl<sub>3</sub>)

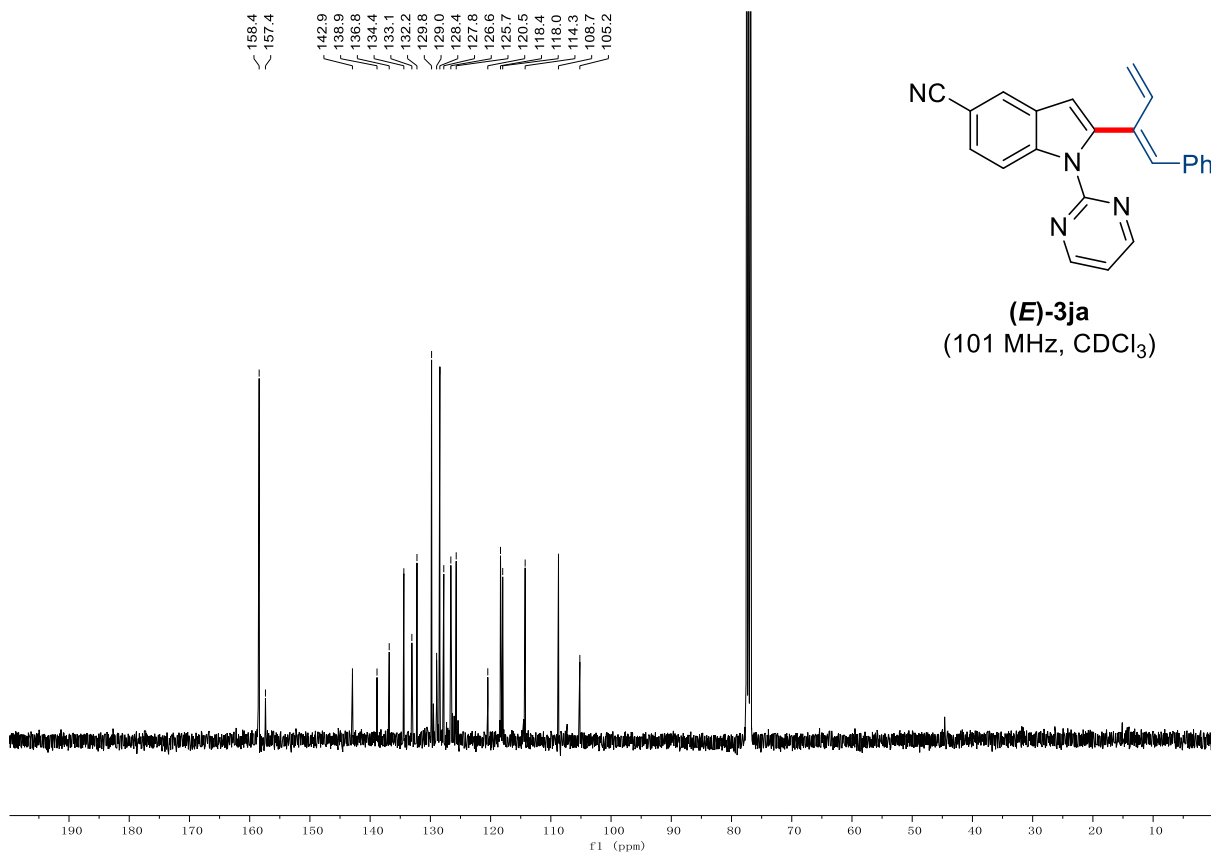

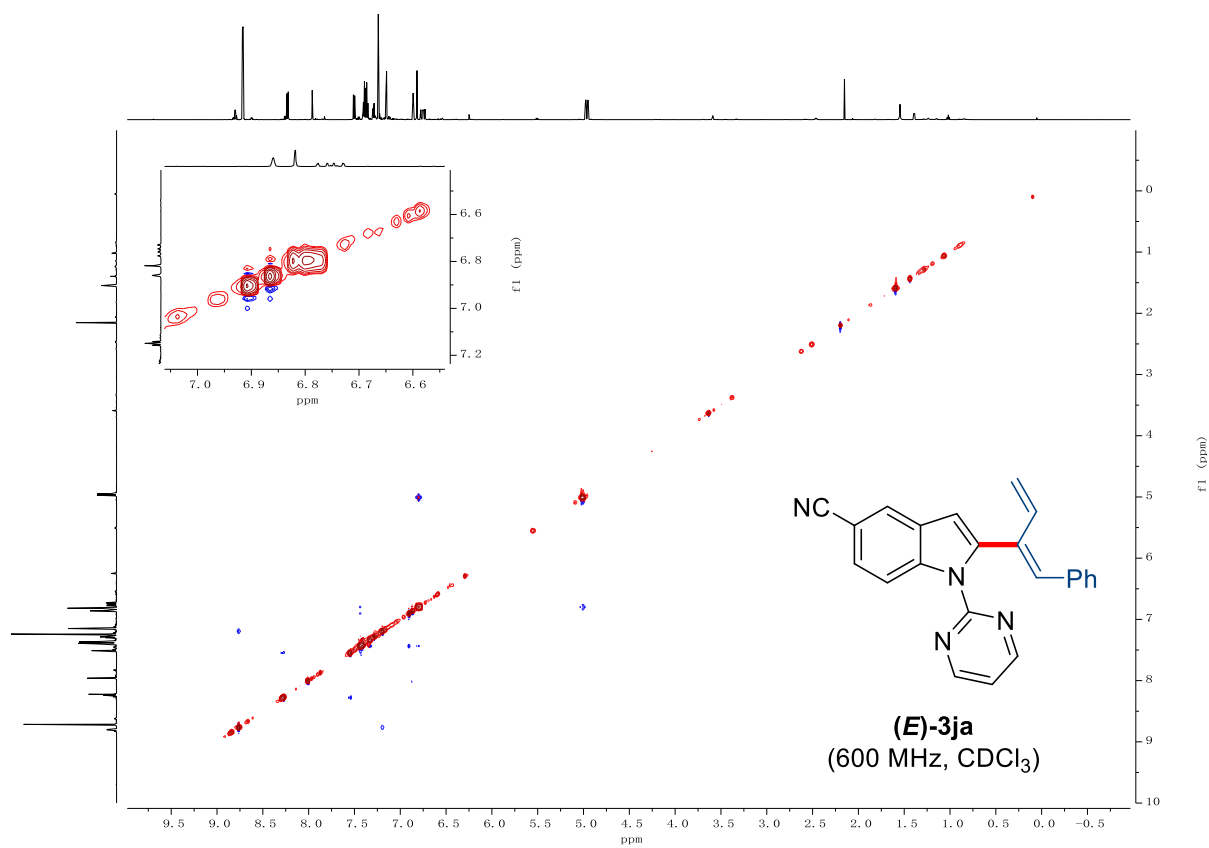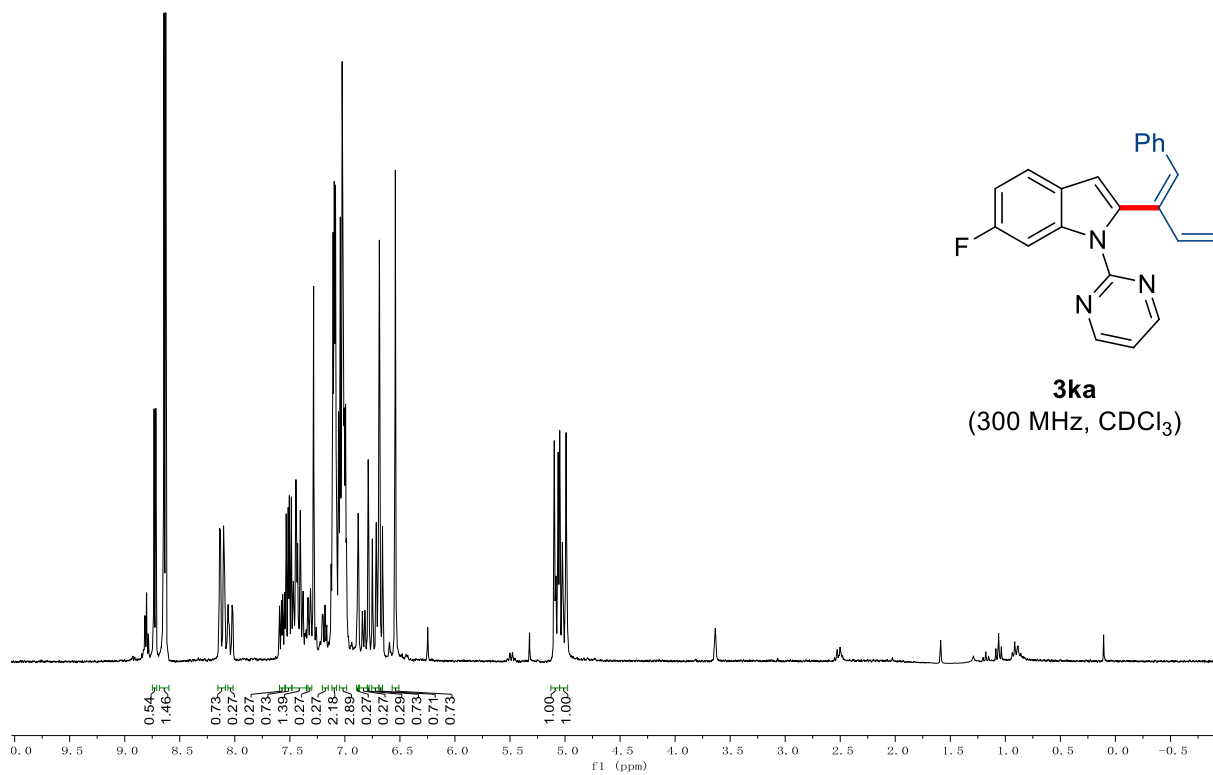

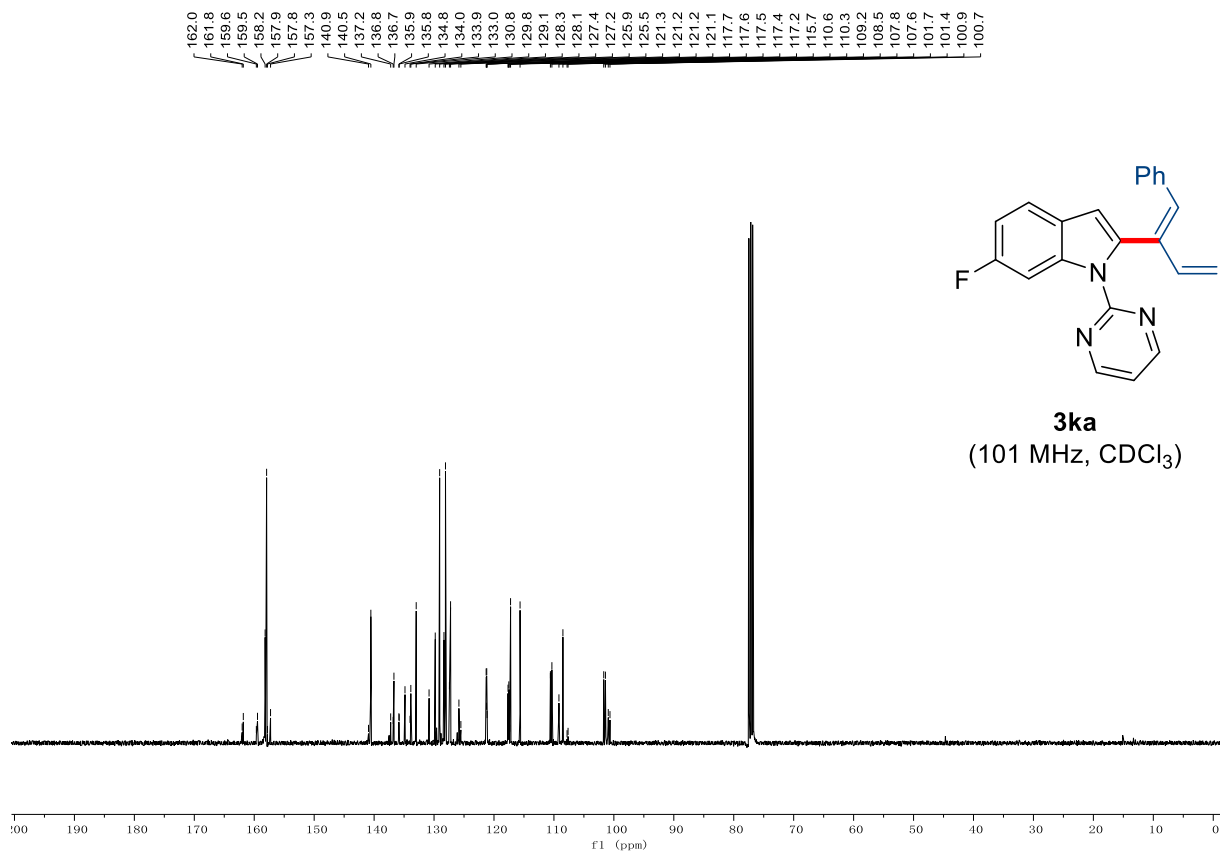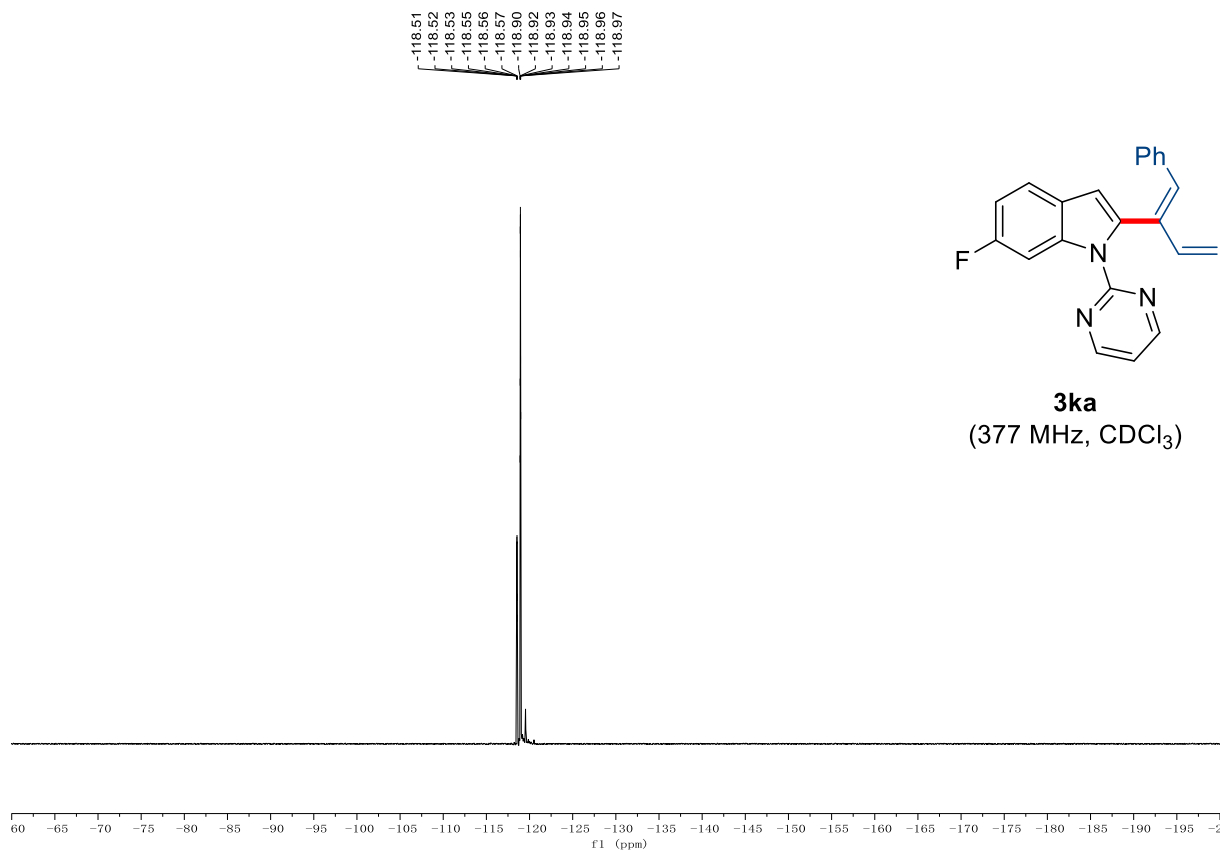



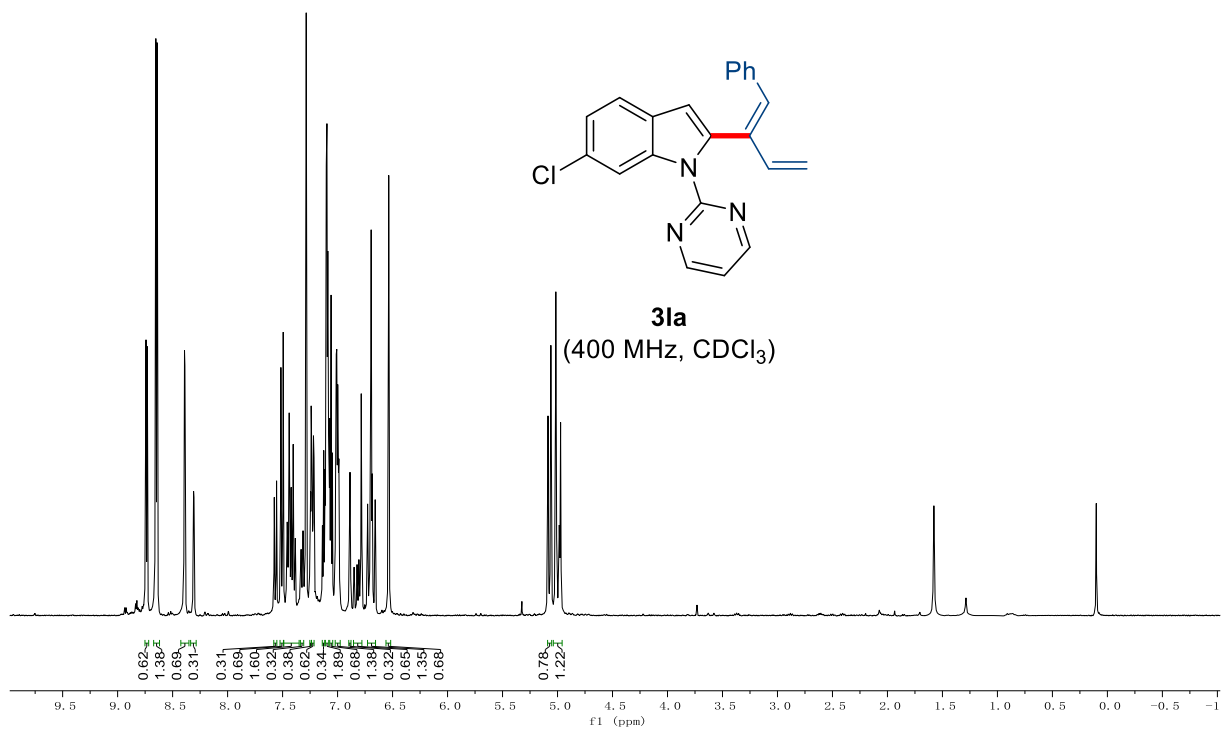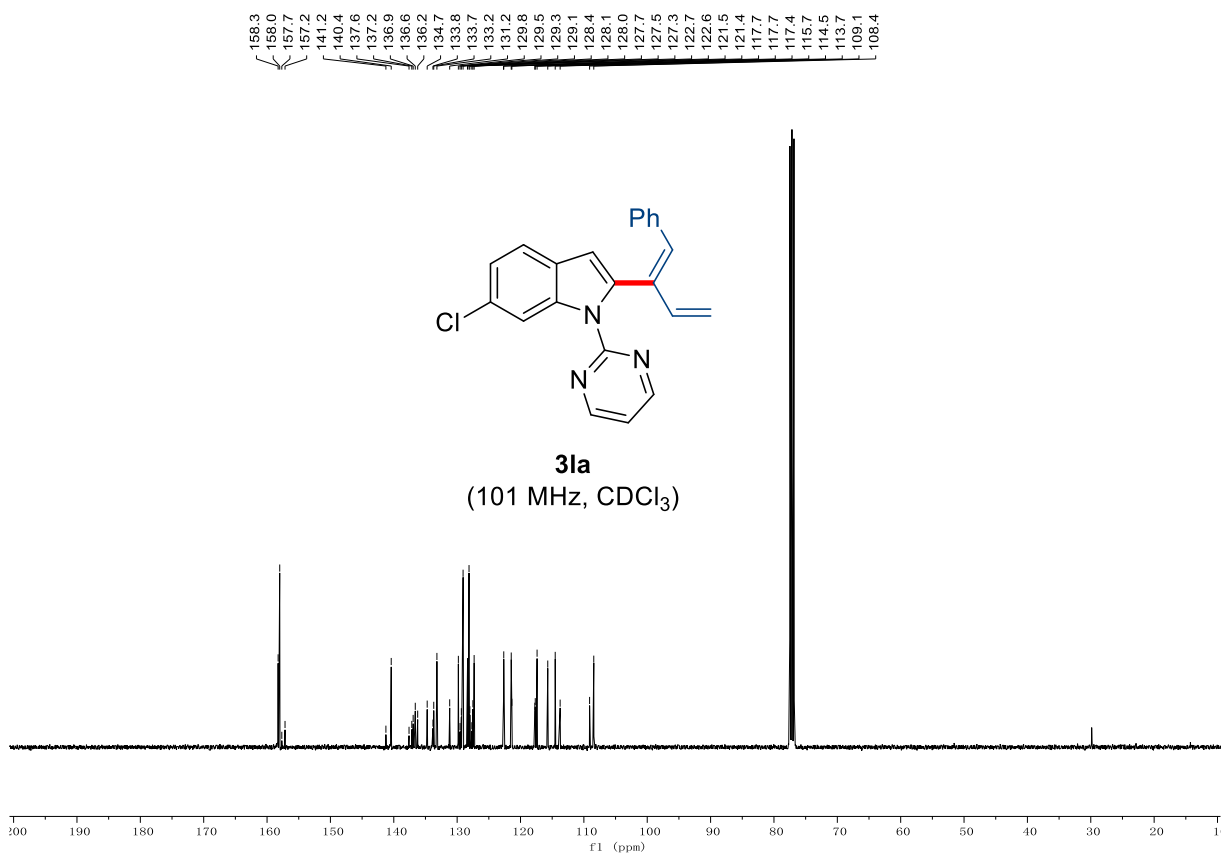

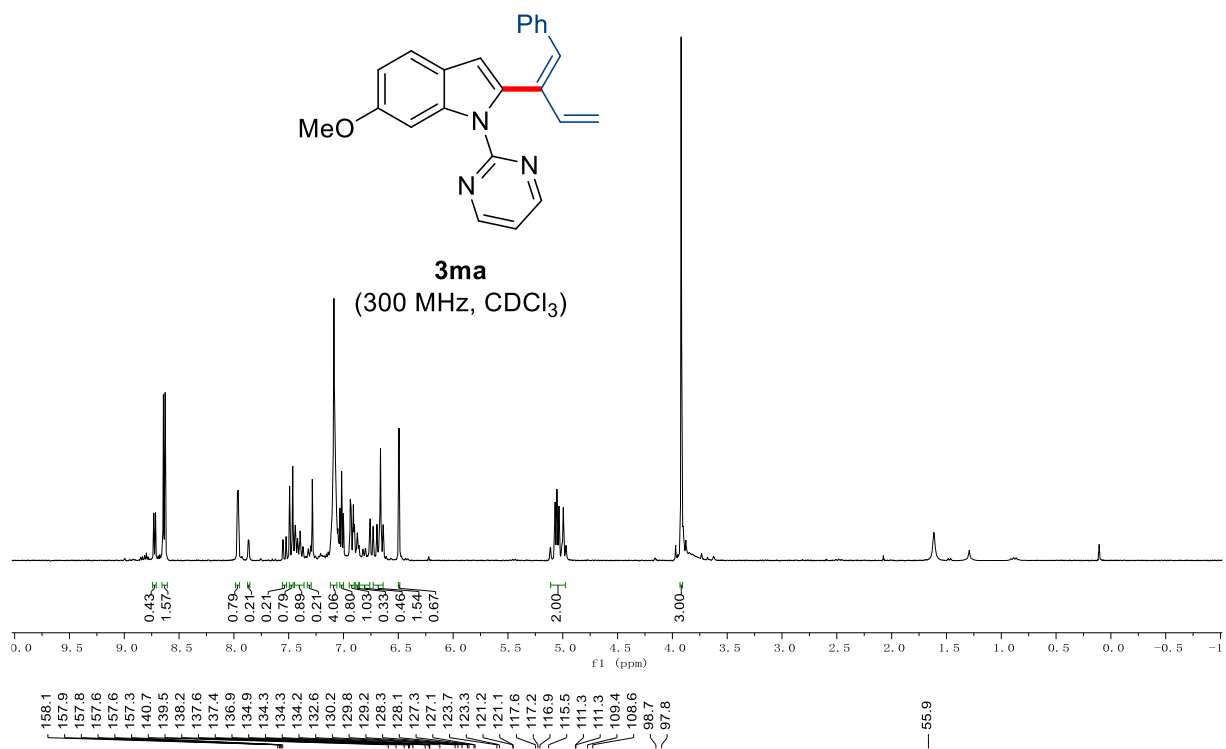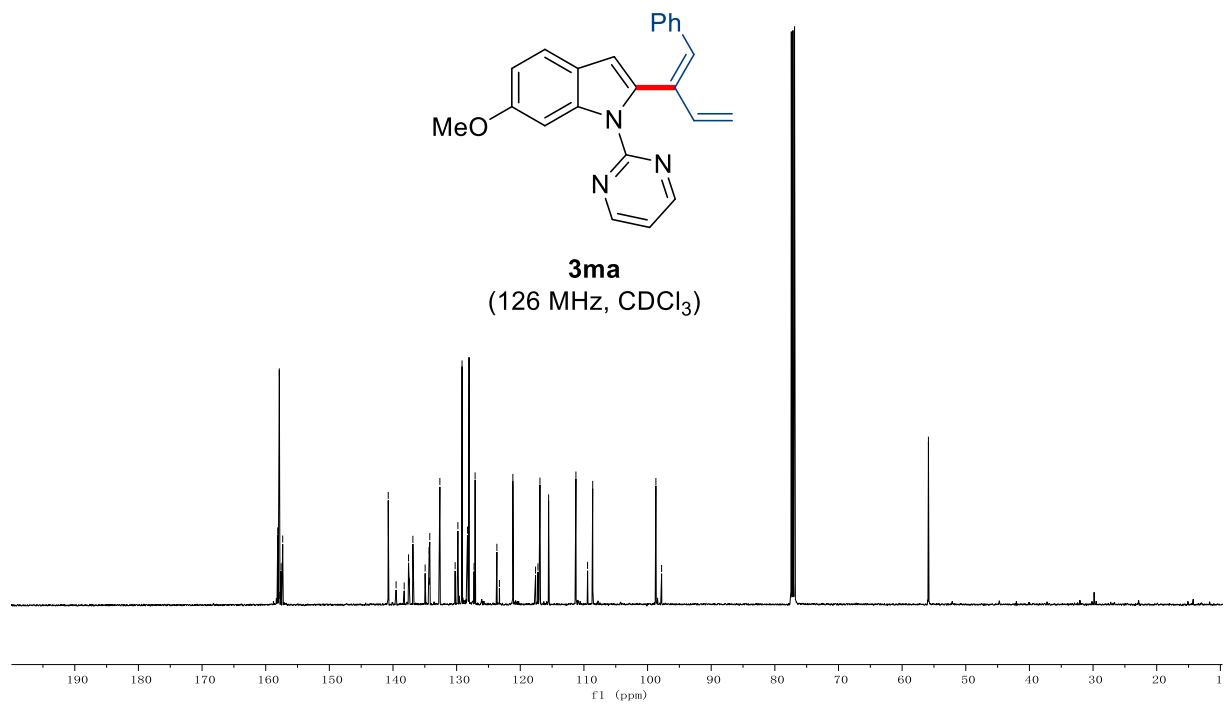

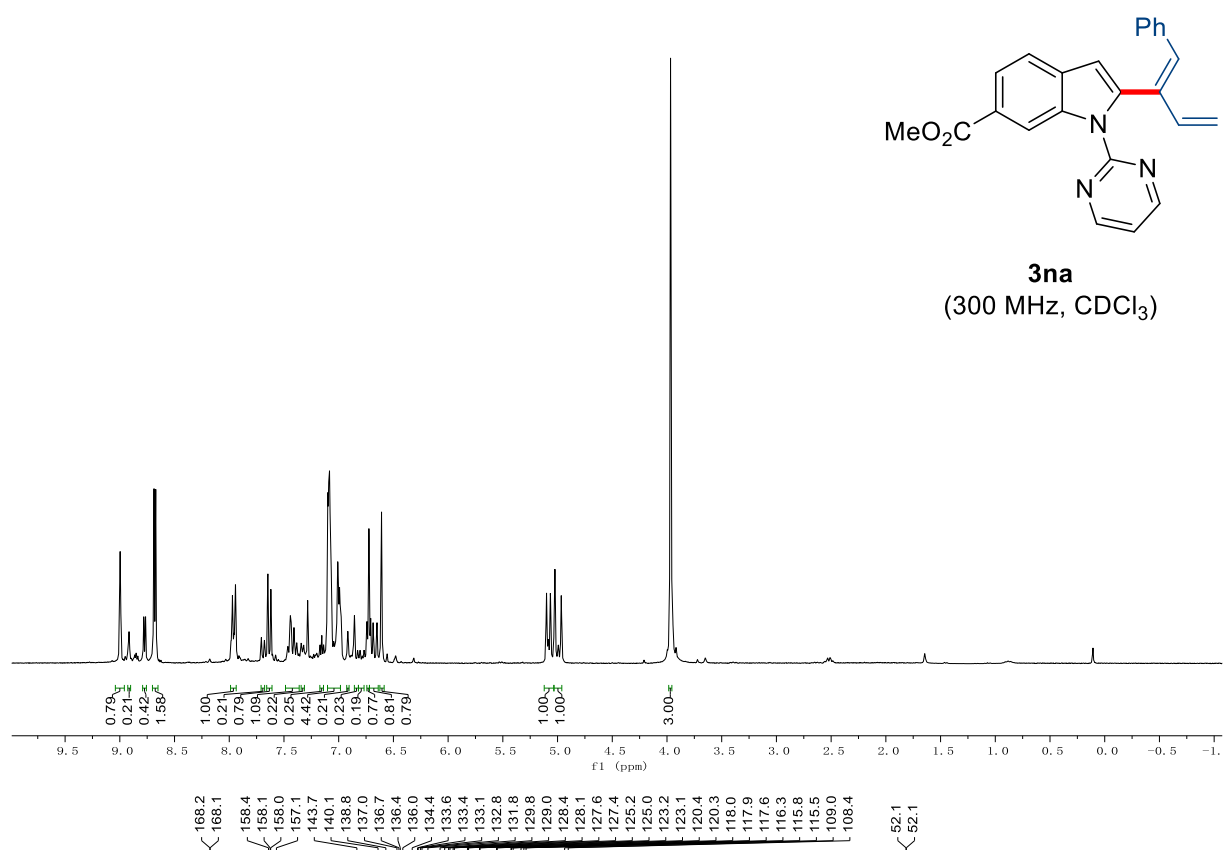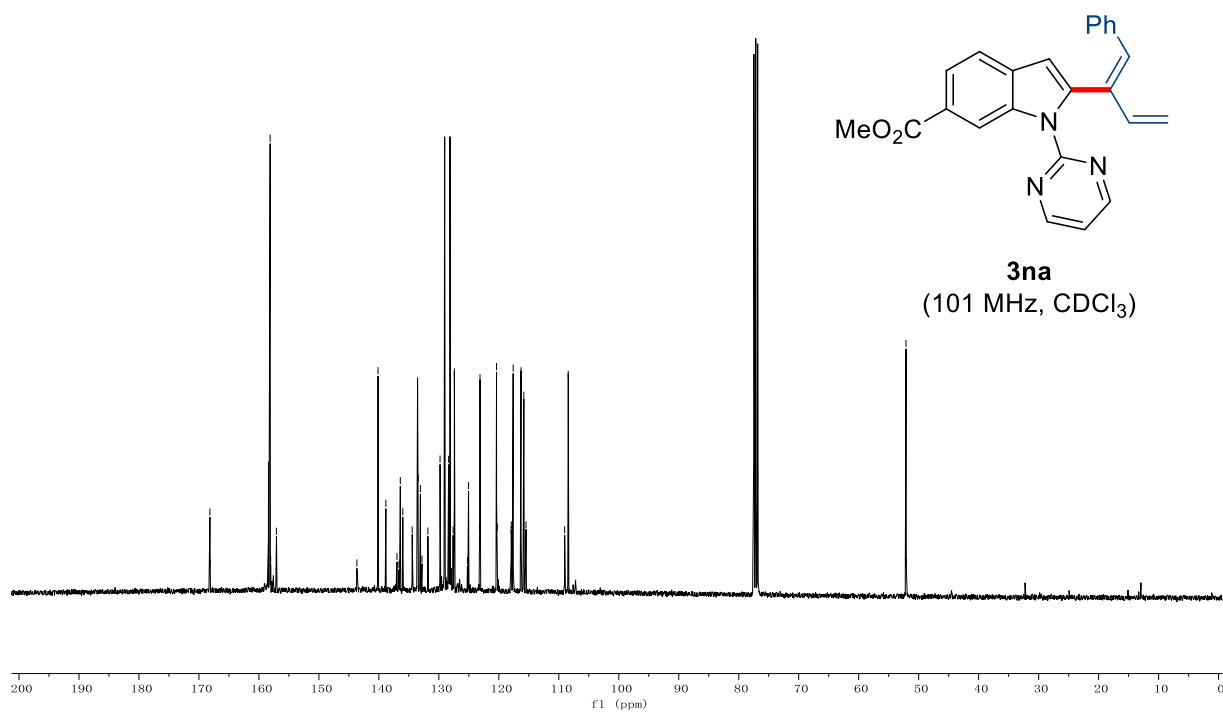

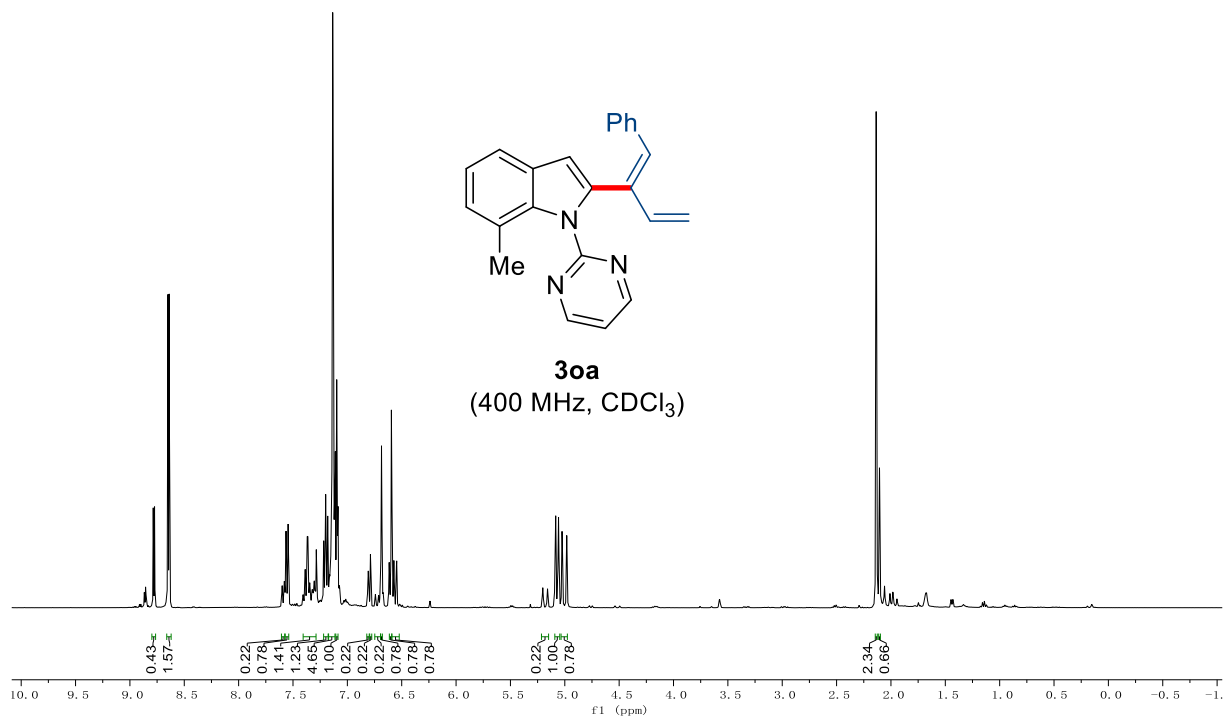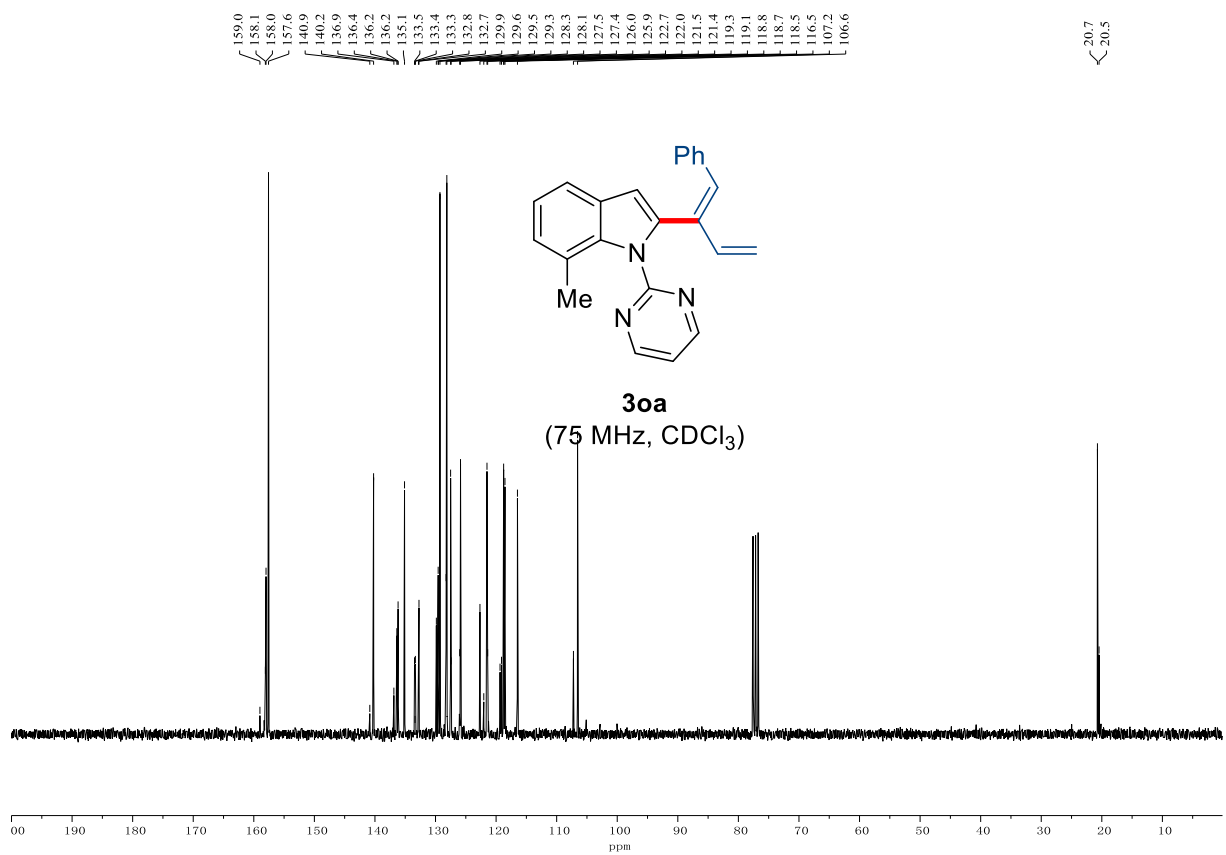

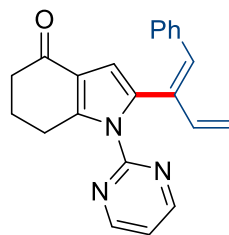

**(Z)-3pa**  
(400 MHz, CDCl<sub>3</sub>)

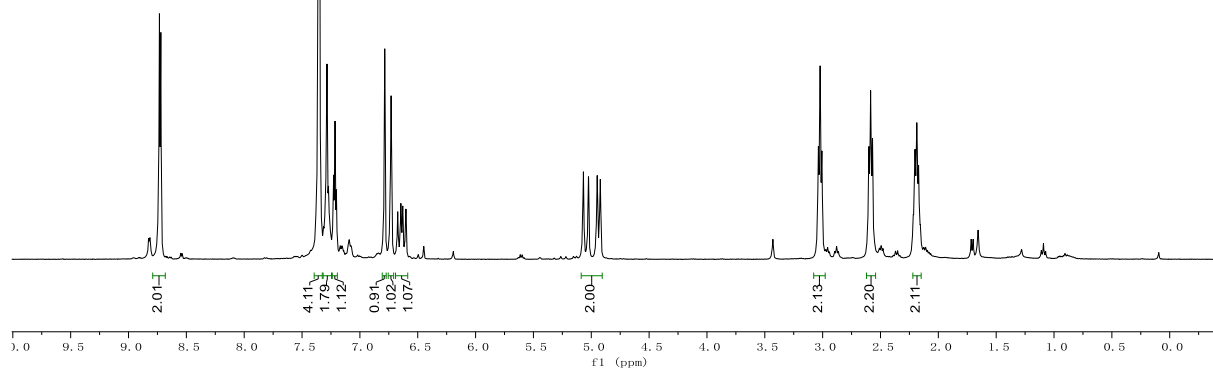

158.8  
158.2  
157.9  
157.5  
140.8  
140.7  
140.6  
140.1  
139.7  
137.4  
136.7  
136.4  
135.8  
135.5  
134.9  
134.3  
134.2  
132.7  
130.4  
130.3  
129.6  
129.6  
129.0  
128.8  
127.5  
127.3  
127.1  
127.0  
126.9  
126.7  
123.7  
123.4  
122.1  
122.0  
120.8  
120.7  
117.9  
117.4  
117.1  
115.7  
114.4  
113.4  
109.5  
108.6

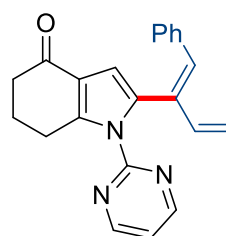

**(Z)-3pa**  
(101 MHz, CDCl<sub>3</sub>)

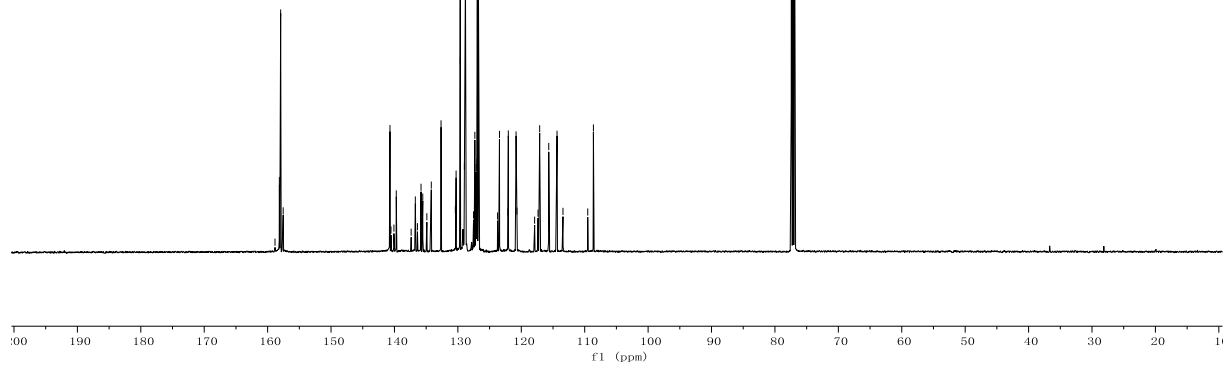

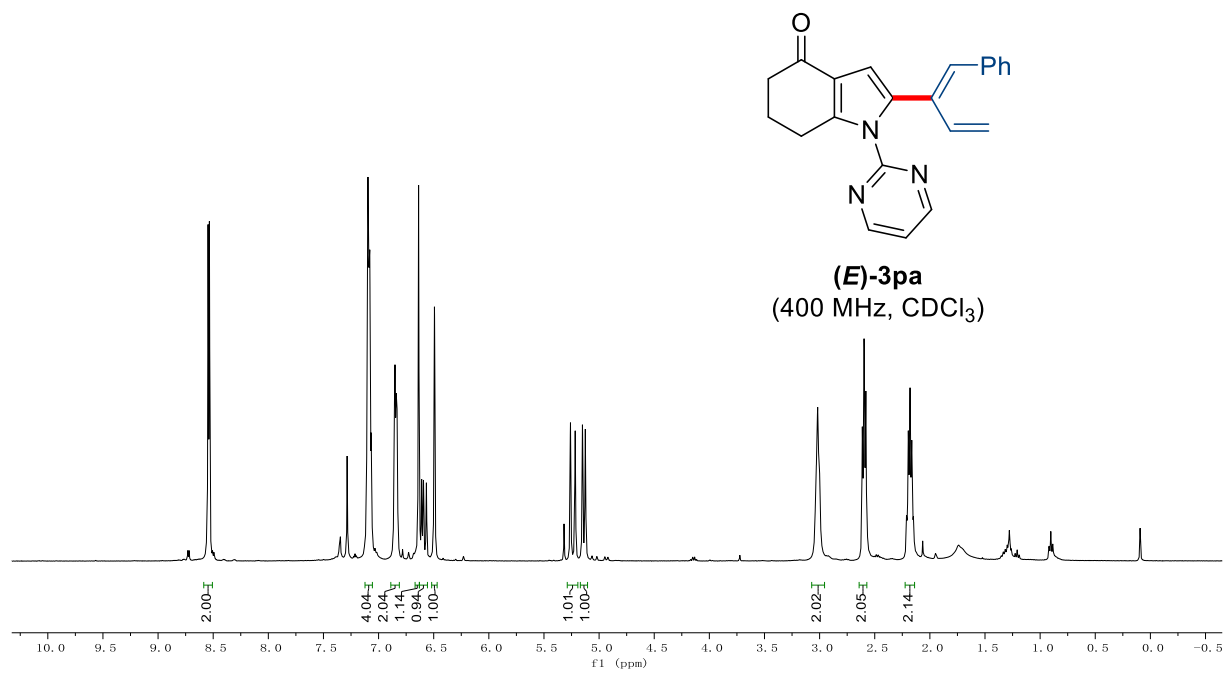

— 195.2

— 157.9  
— 156.2

— 145.6

— 140.1

— 136.4

— 133.4

— 132.3

— 130.1

— 128.8

— 128.1

— 127.3

— 122.2

— 118.7

— 116.1

— 109.4

— 38.1

— 24.3  
— 24.0

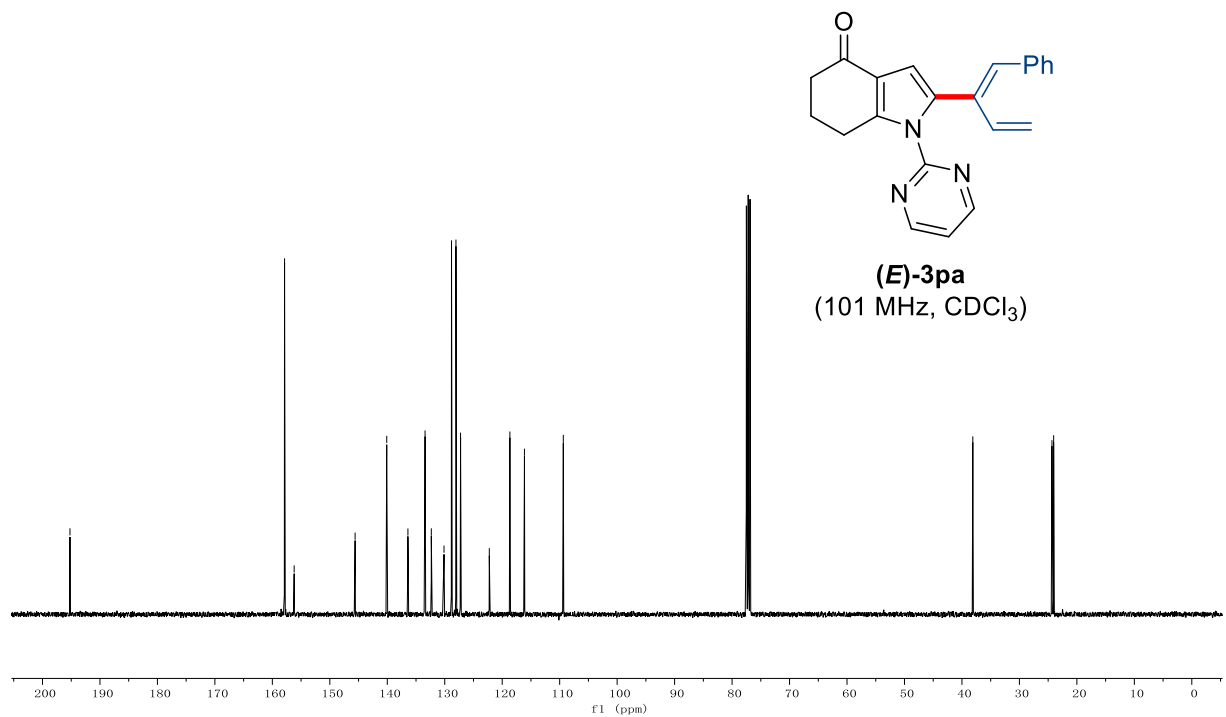

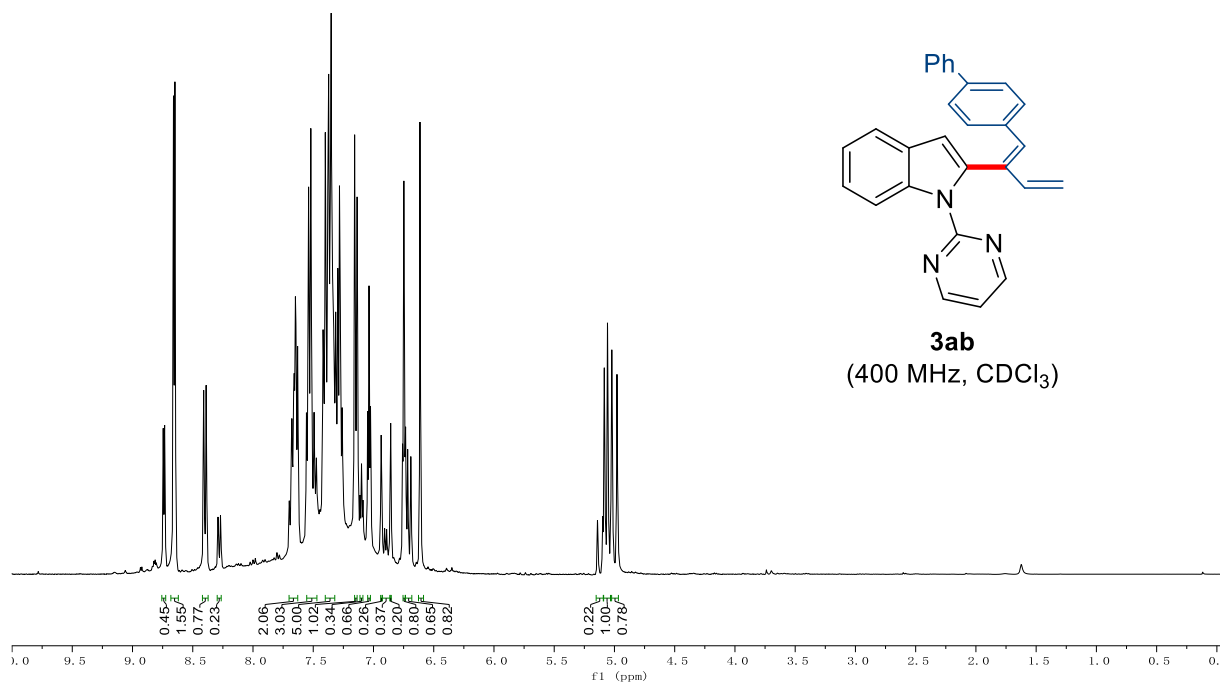

158.2  
158.0  
157.9  
157.5  
140.8  
140.7  
140.6  
140.1  
139.7  
137.4  
136.7  
136.4  
135.8  
135.5  
134.9  
134.3  
134.2  
132.7  
130.4  
130.3  
129.6  
129.6  
128.8  
127.5  
127.3  
127.1  
127.0  
126.9  
126.7  
123.7  
123.4  
122.1  
122.0  
120.6  
120.7  
117.9  
117.4  
117.1  
115.7  
114.4  
113.4  
109.5

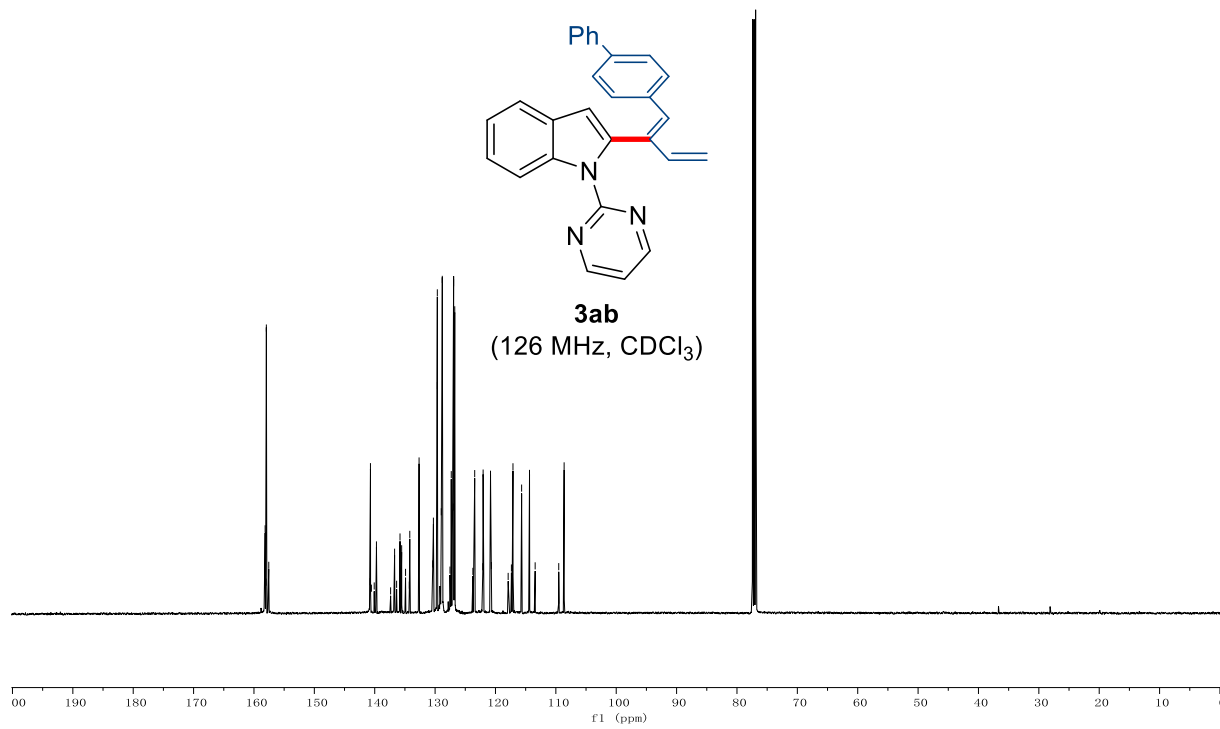

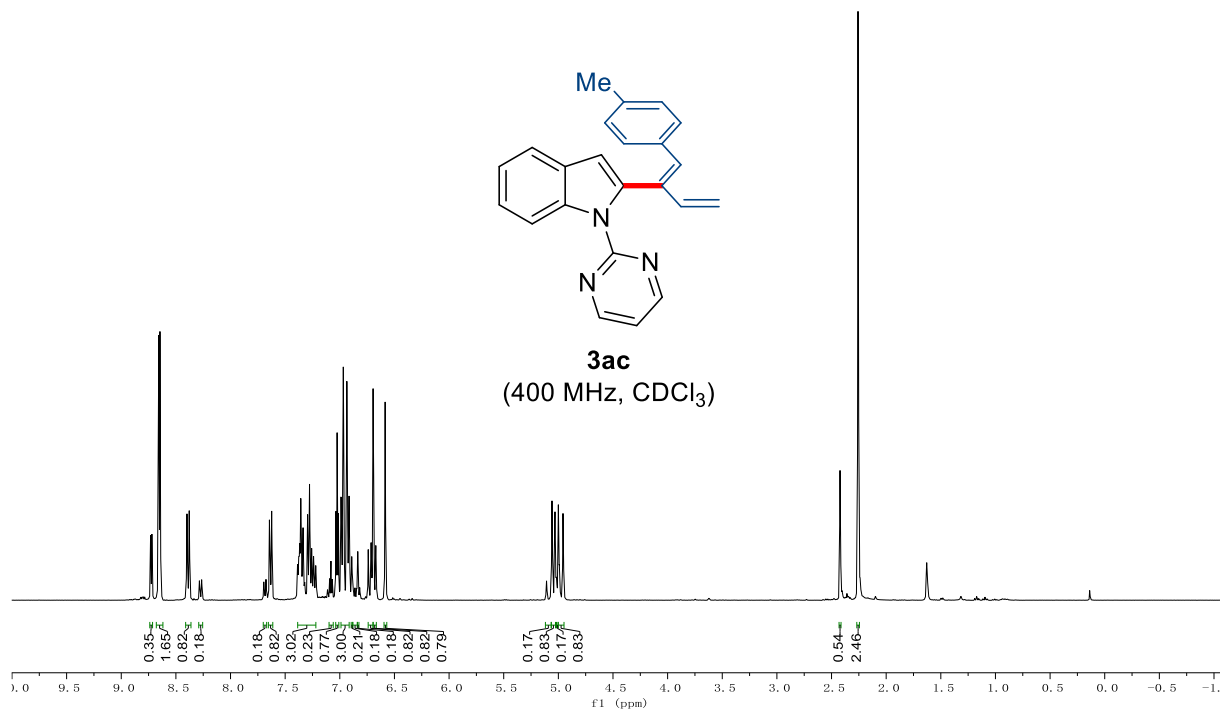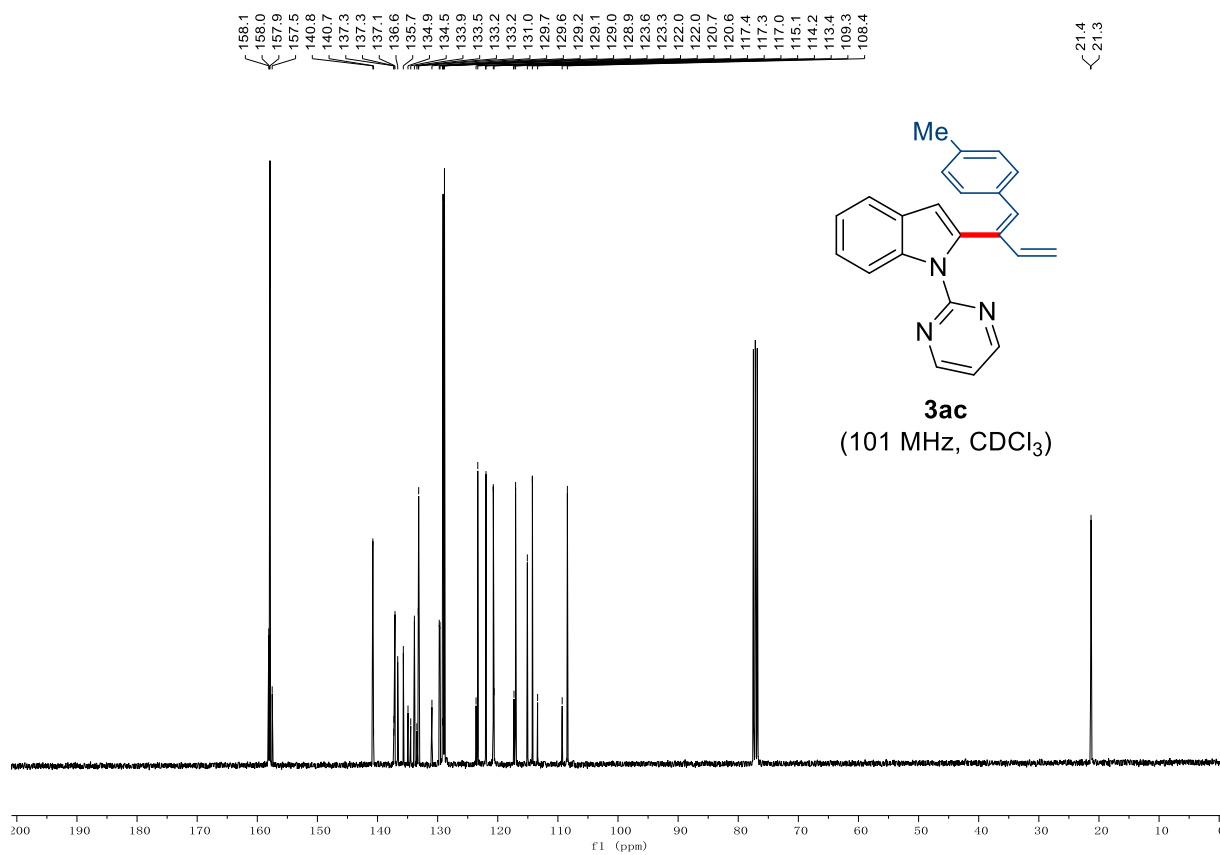



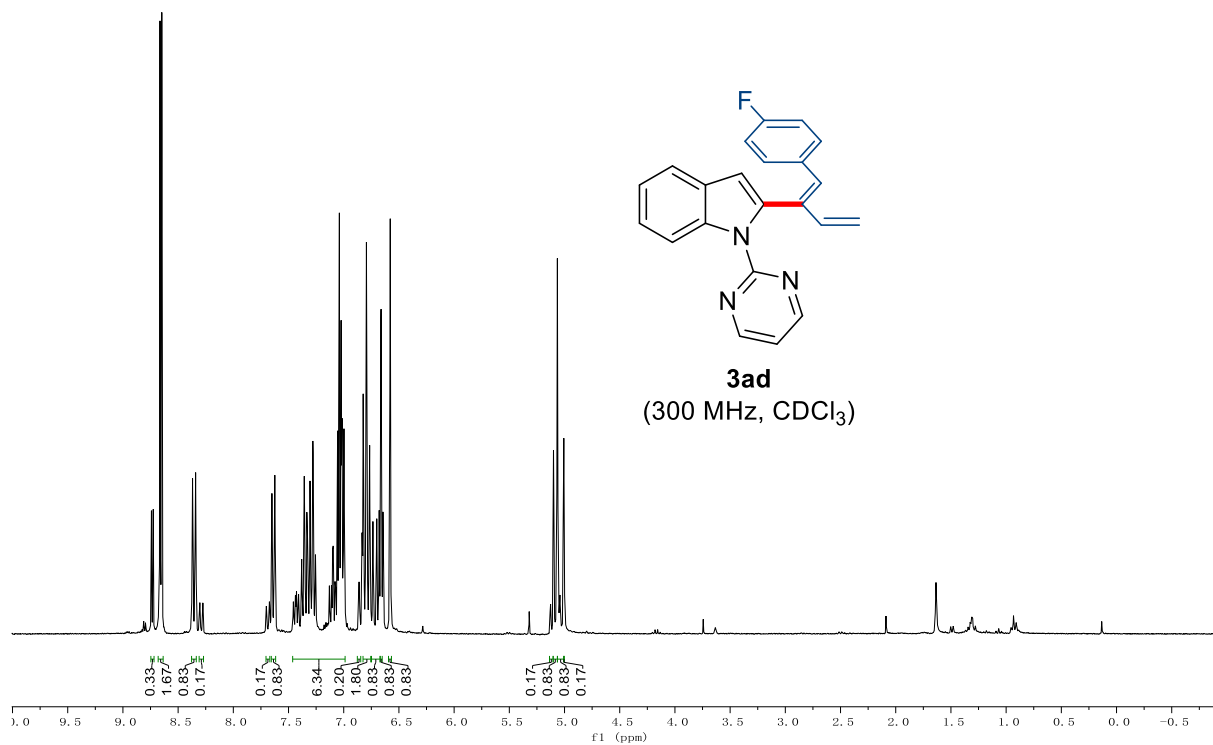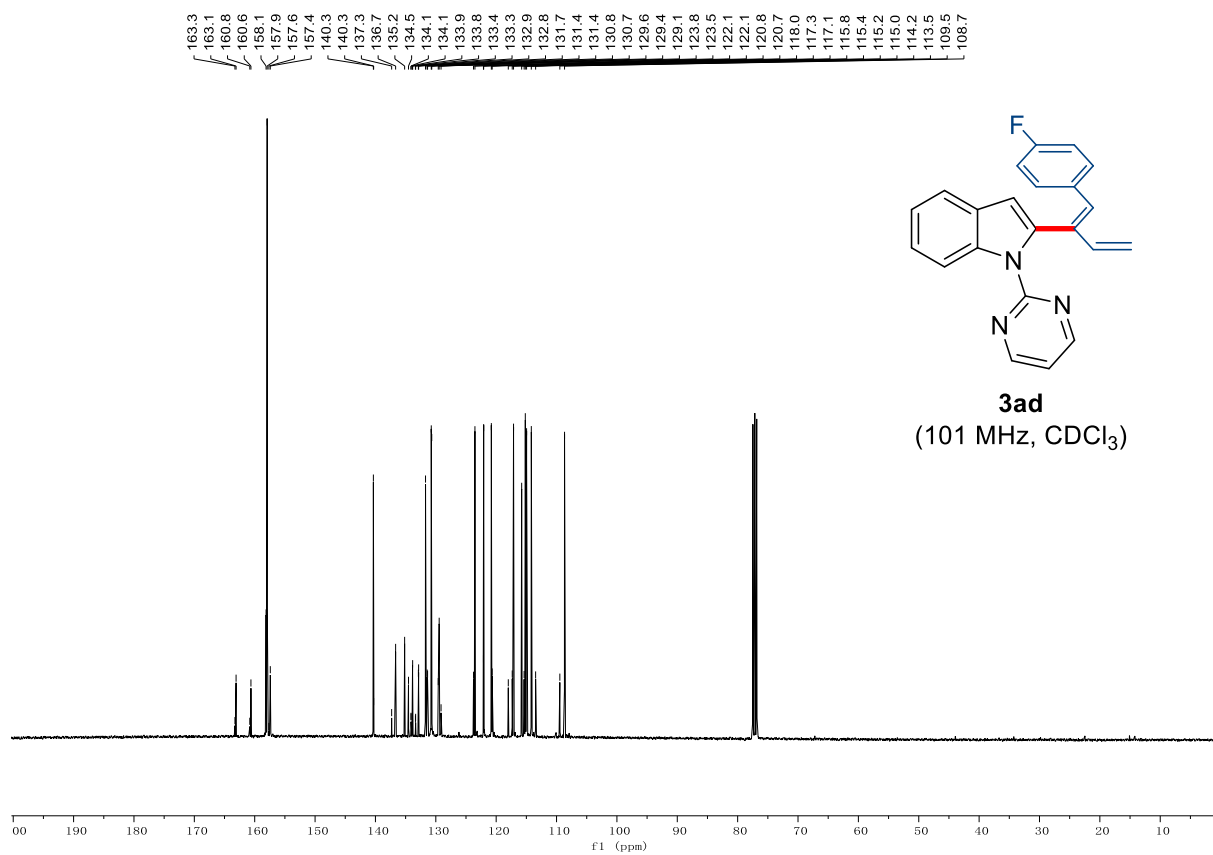

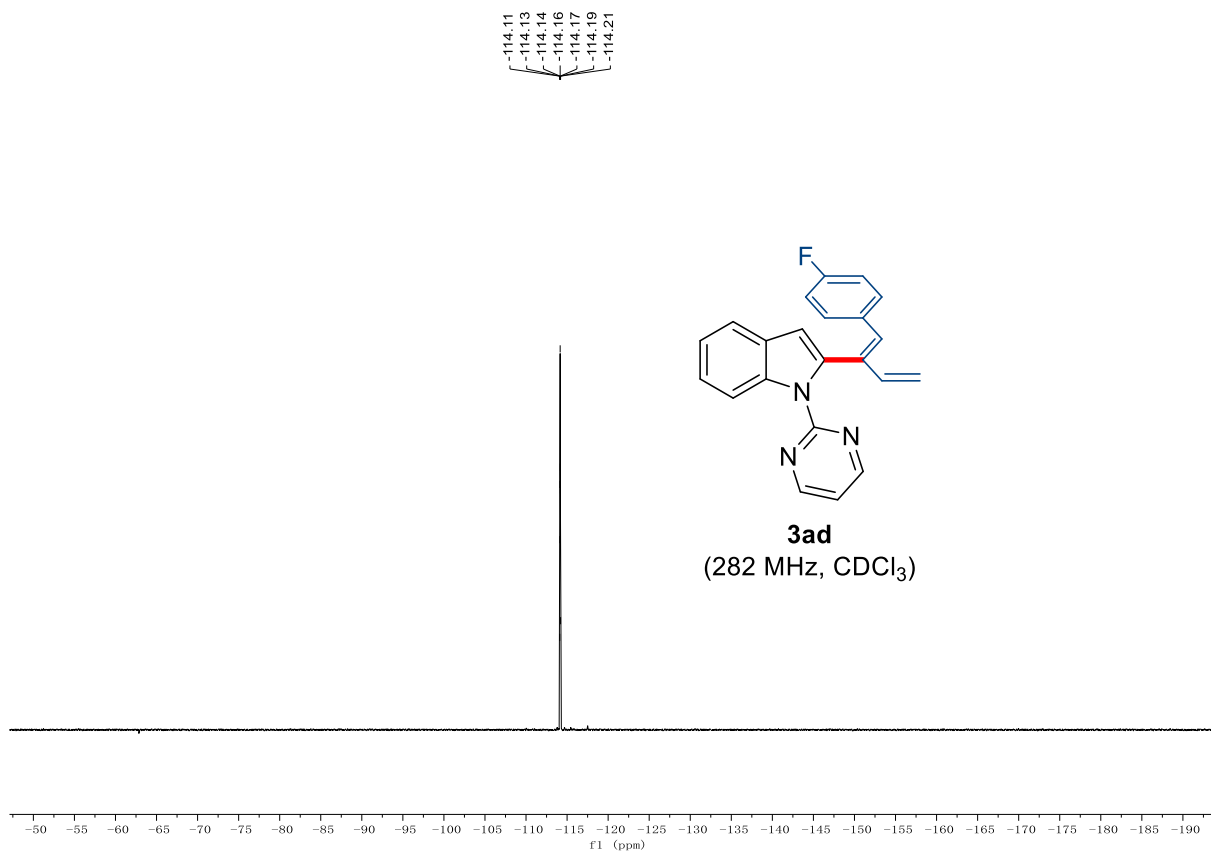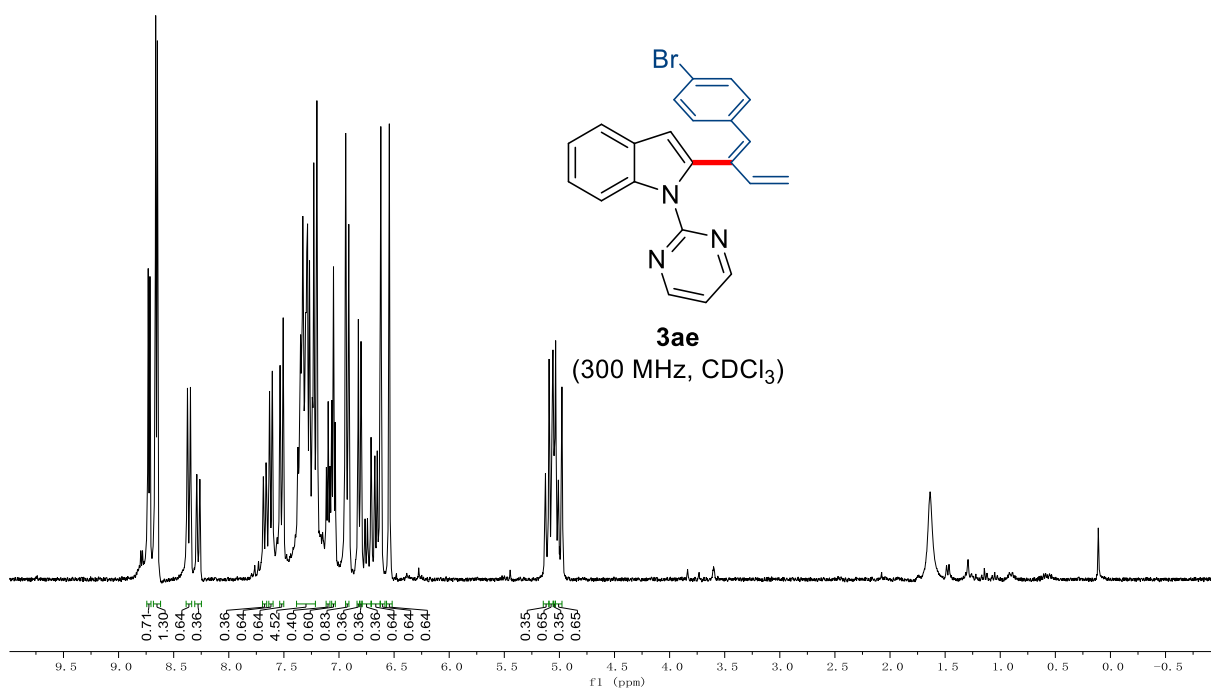

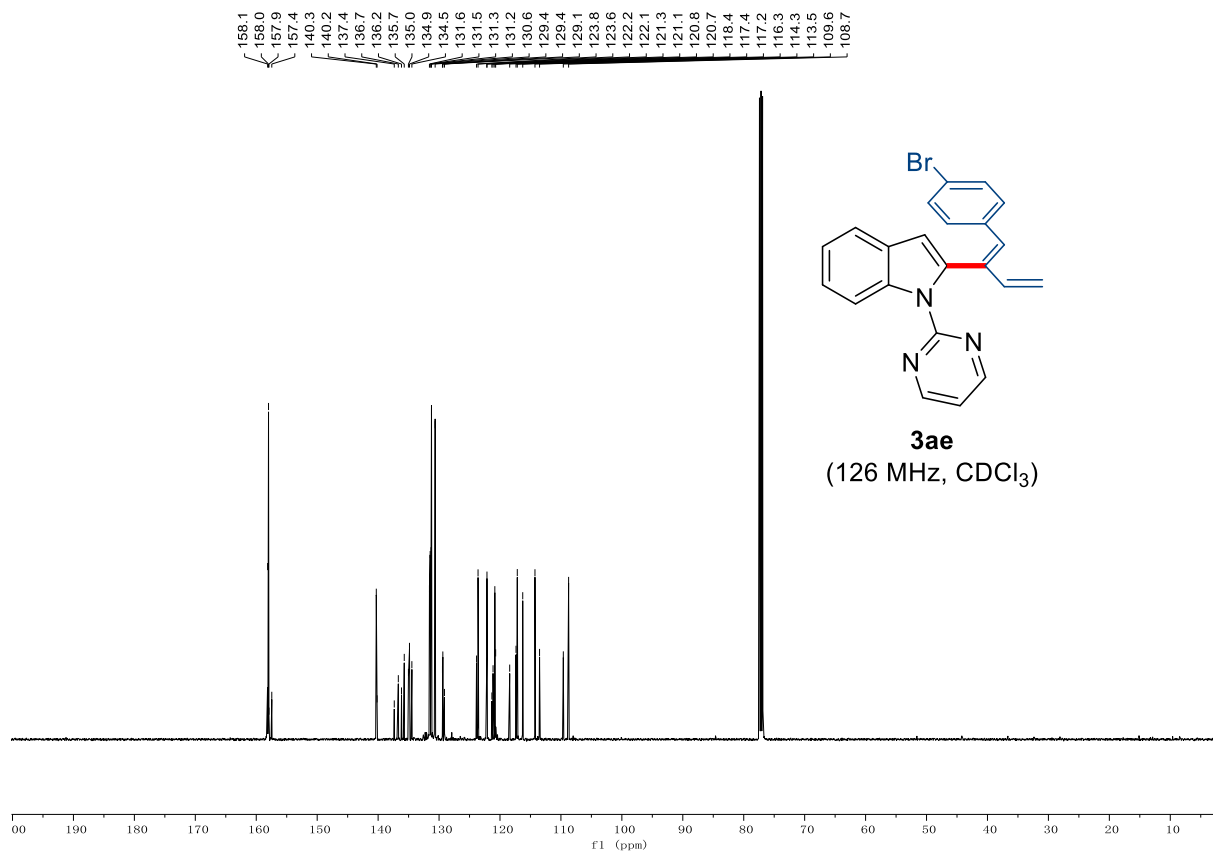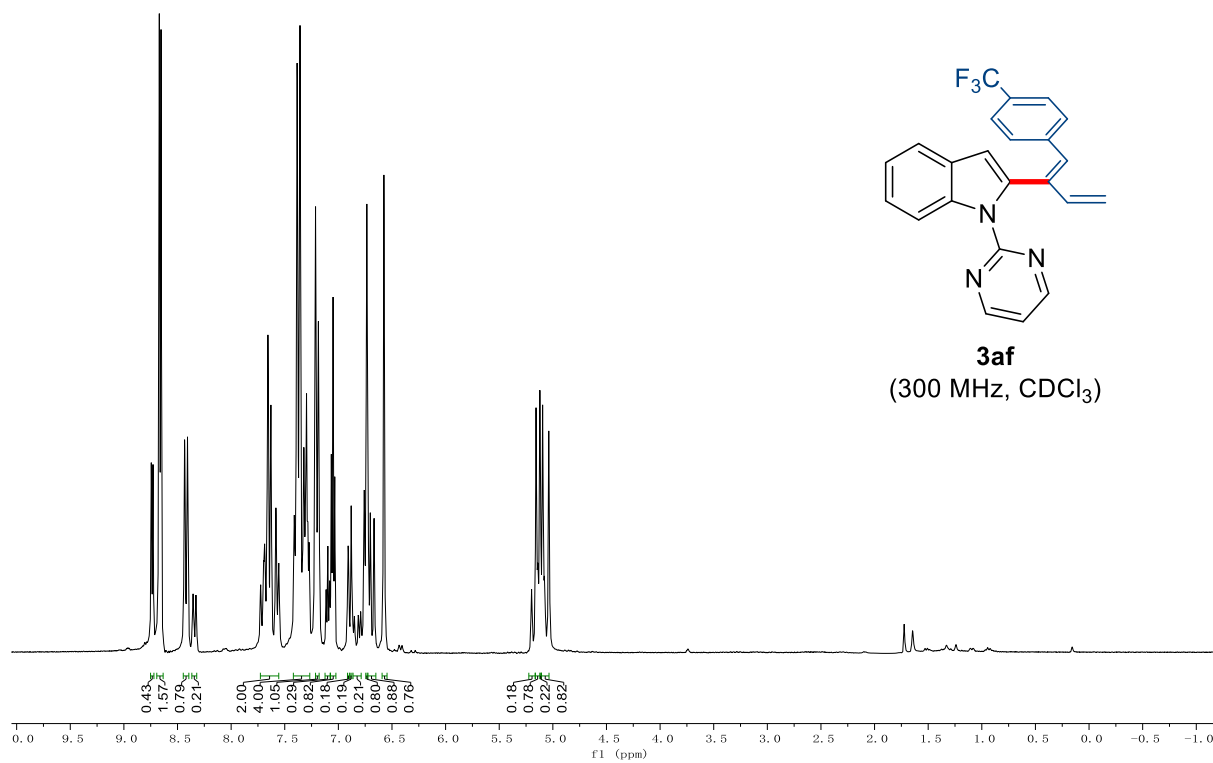

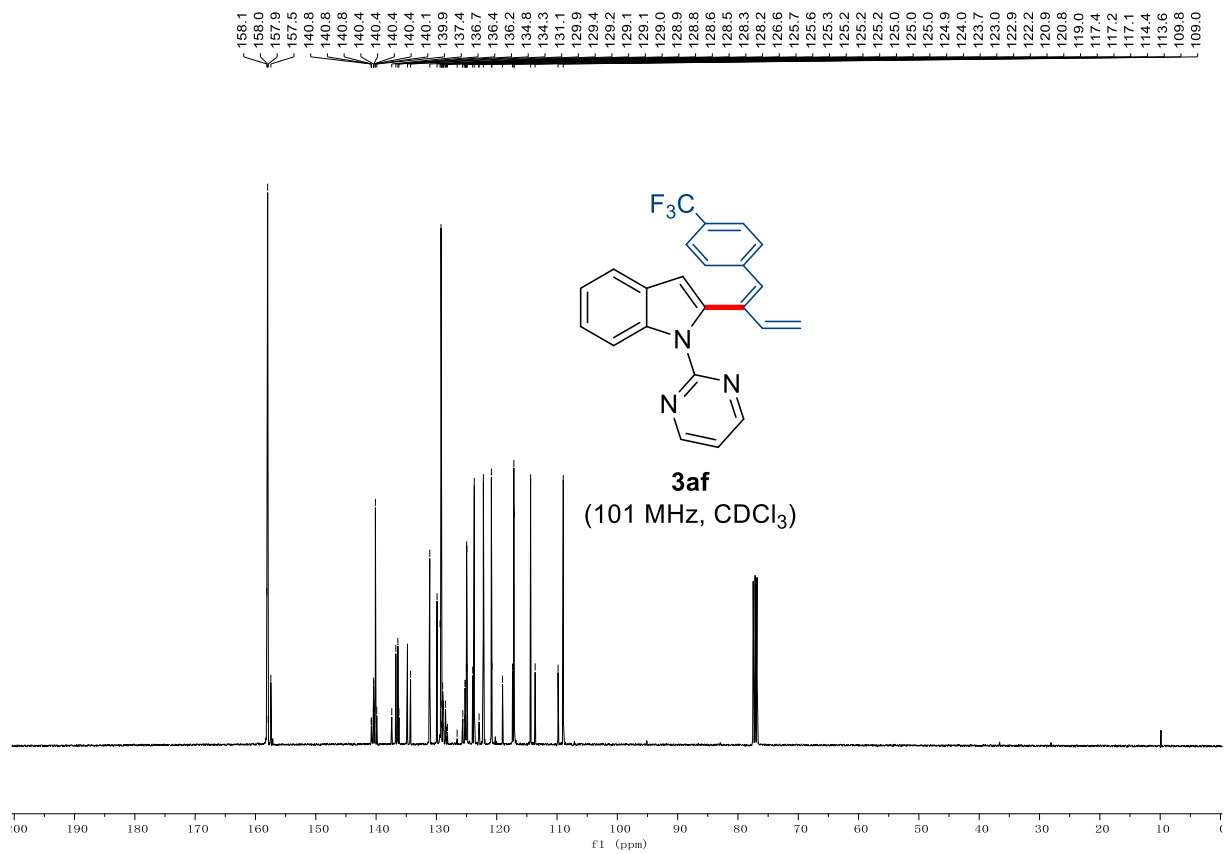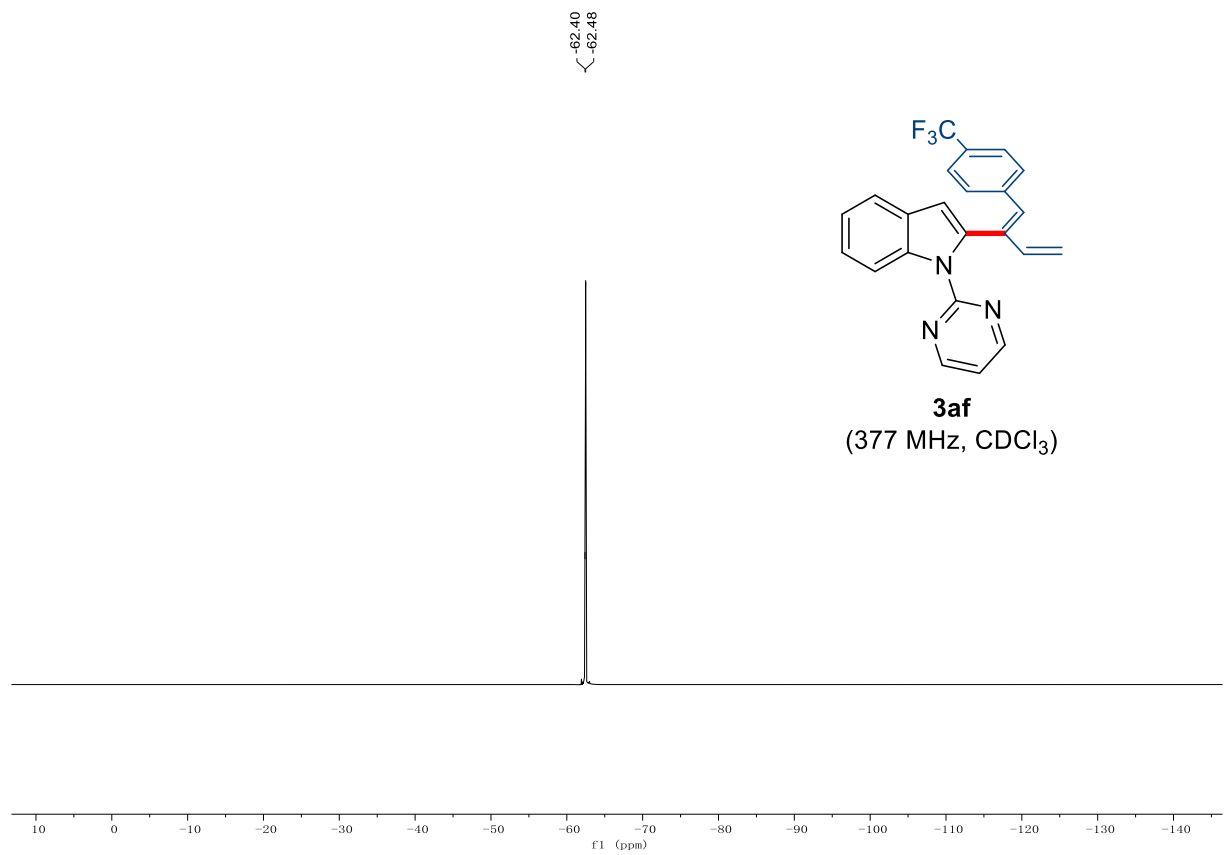

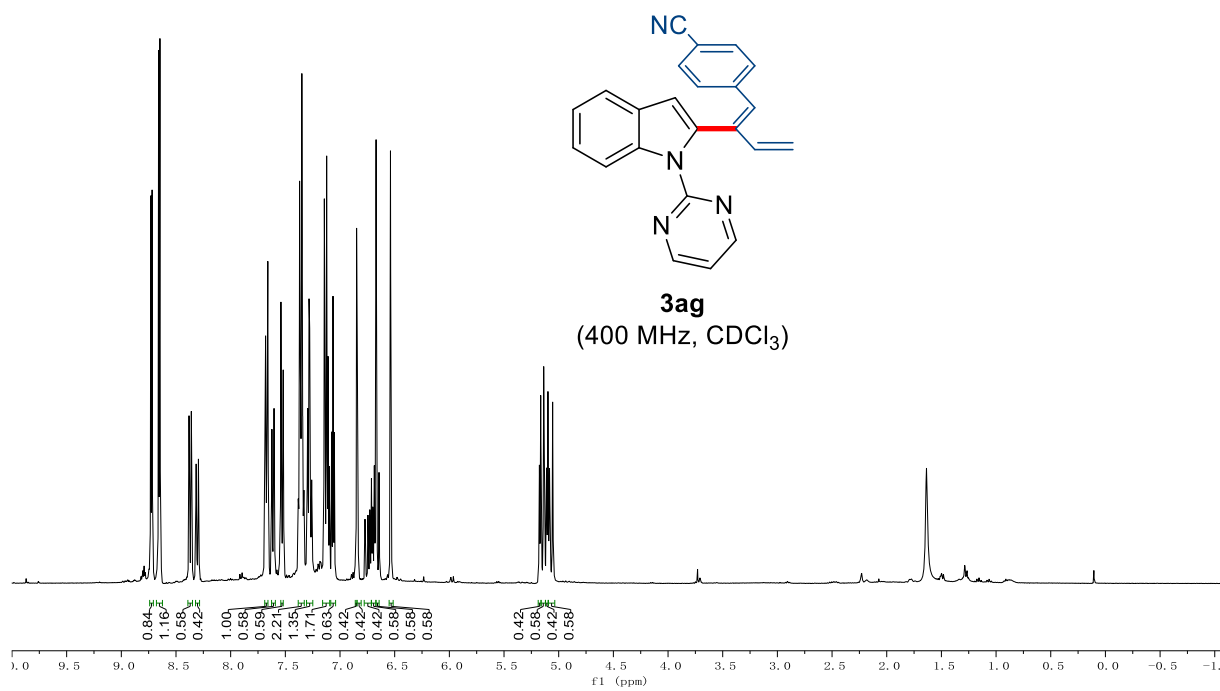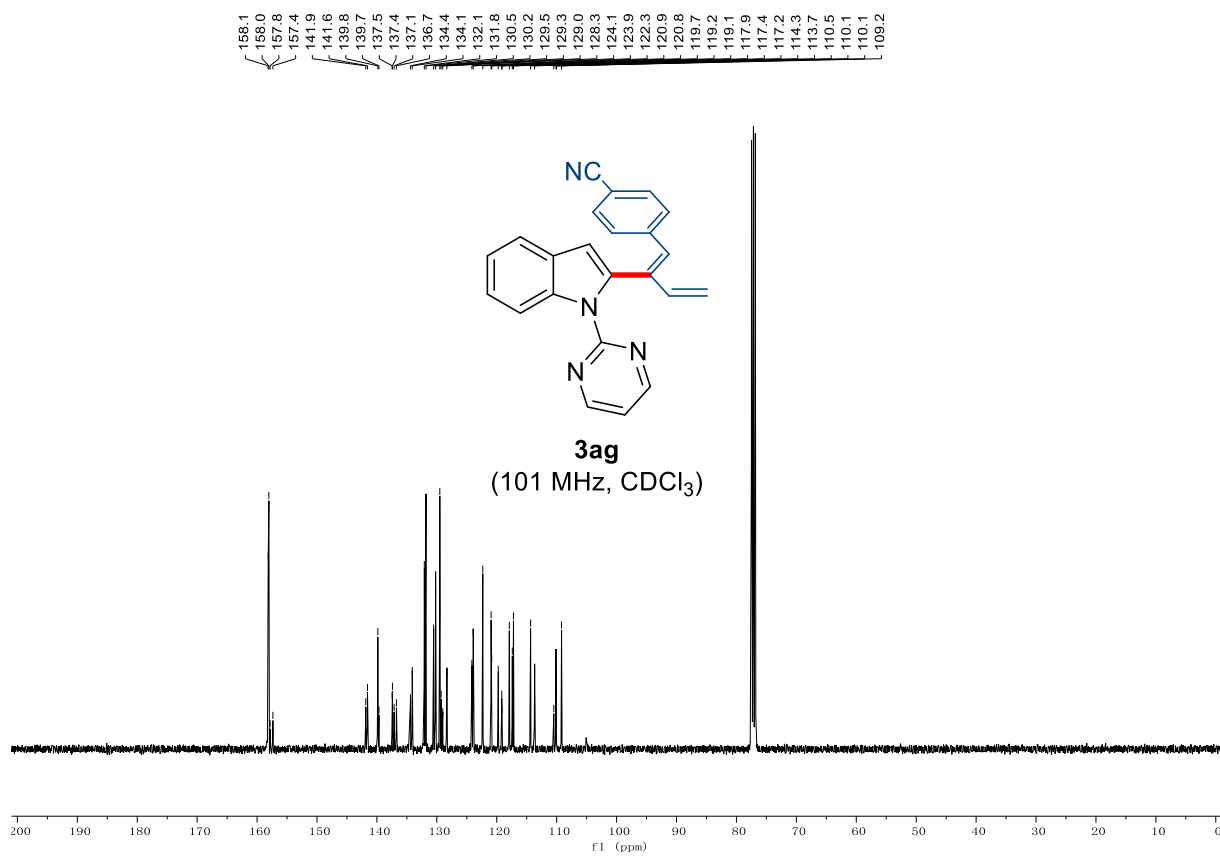

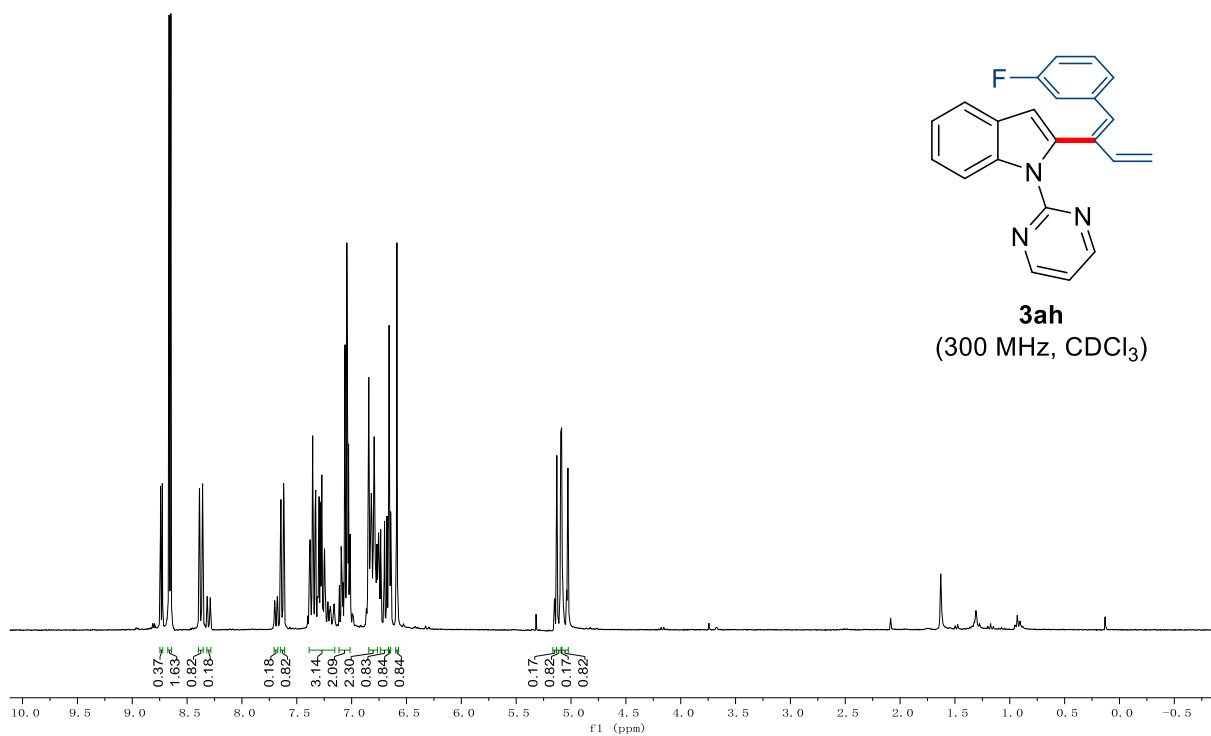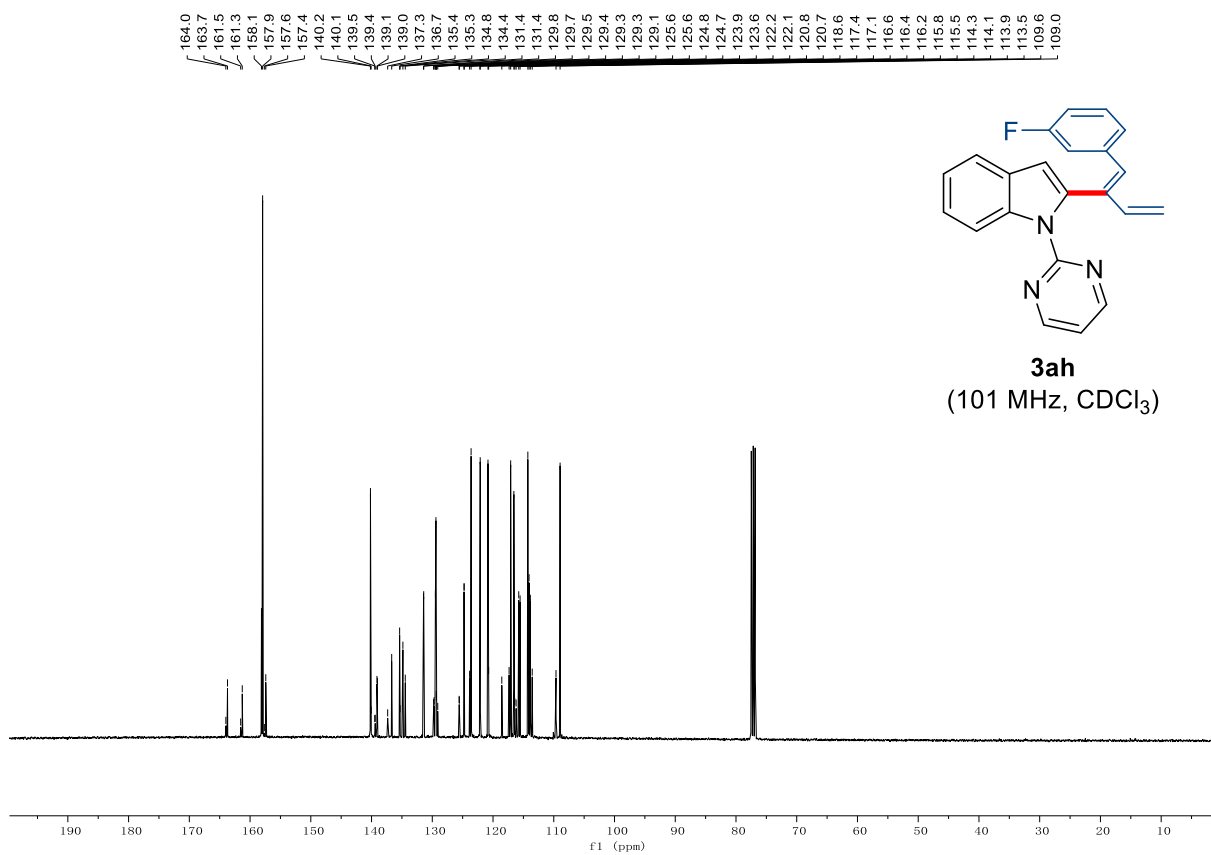

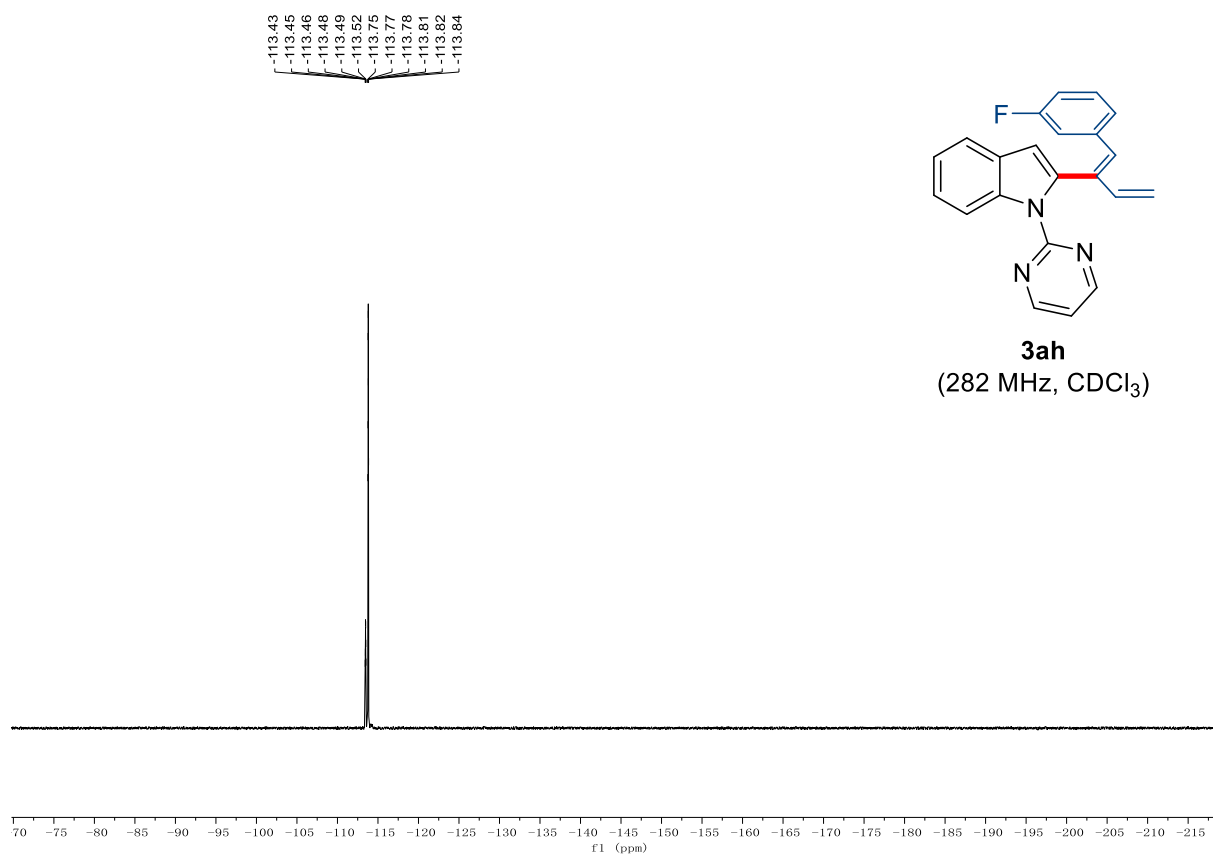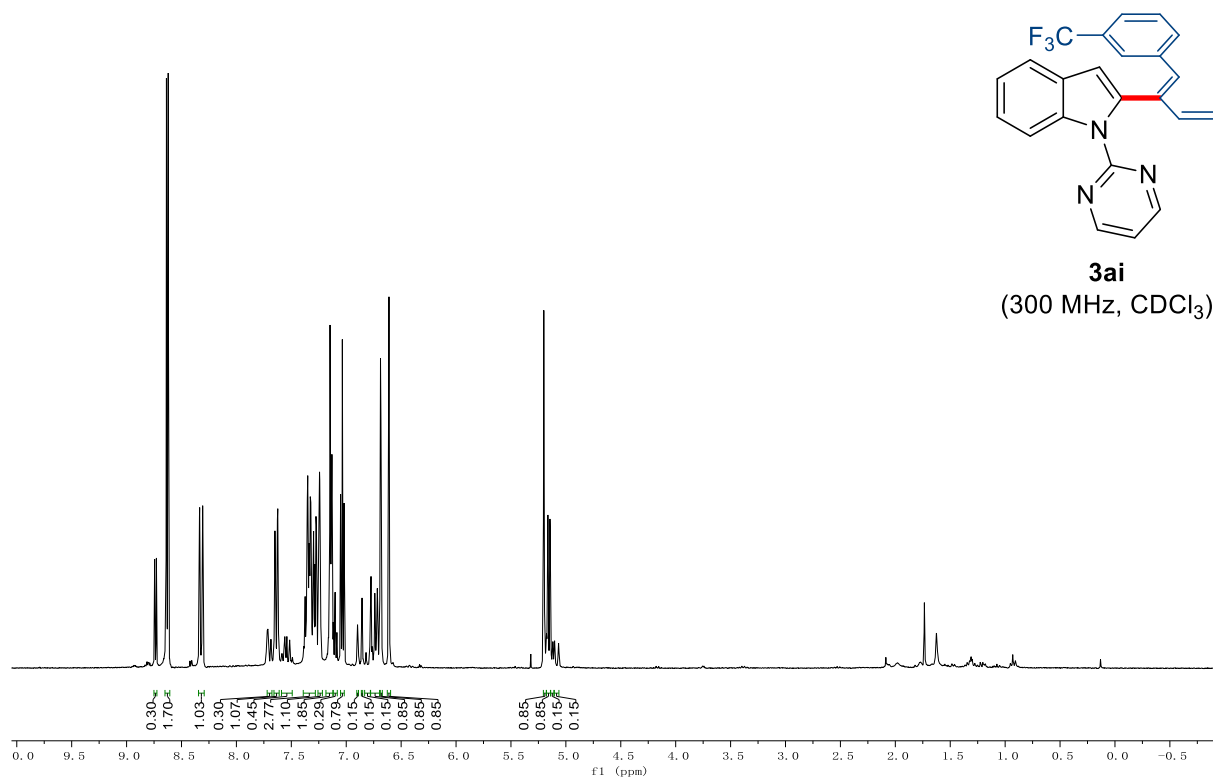

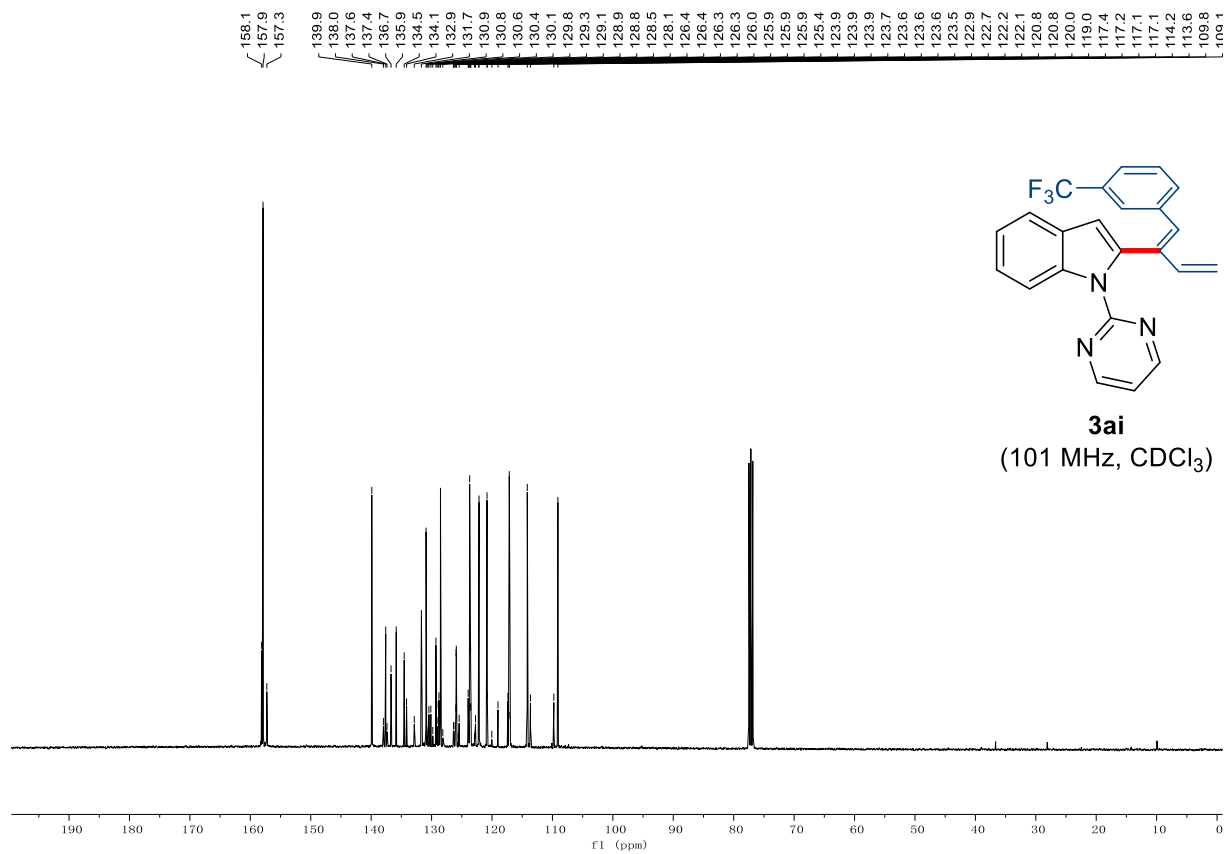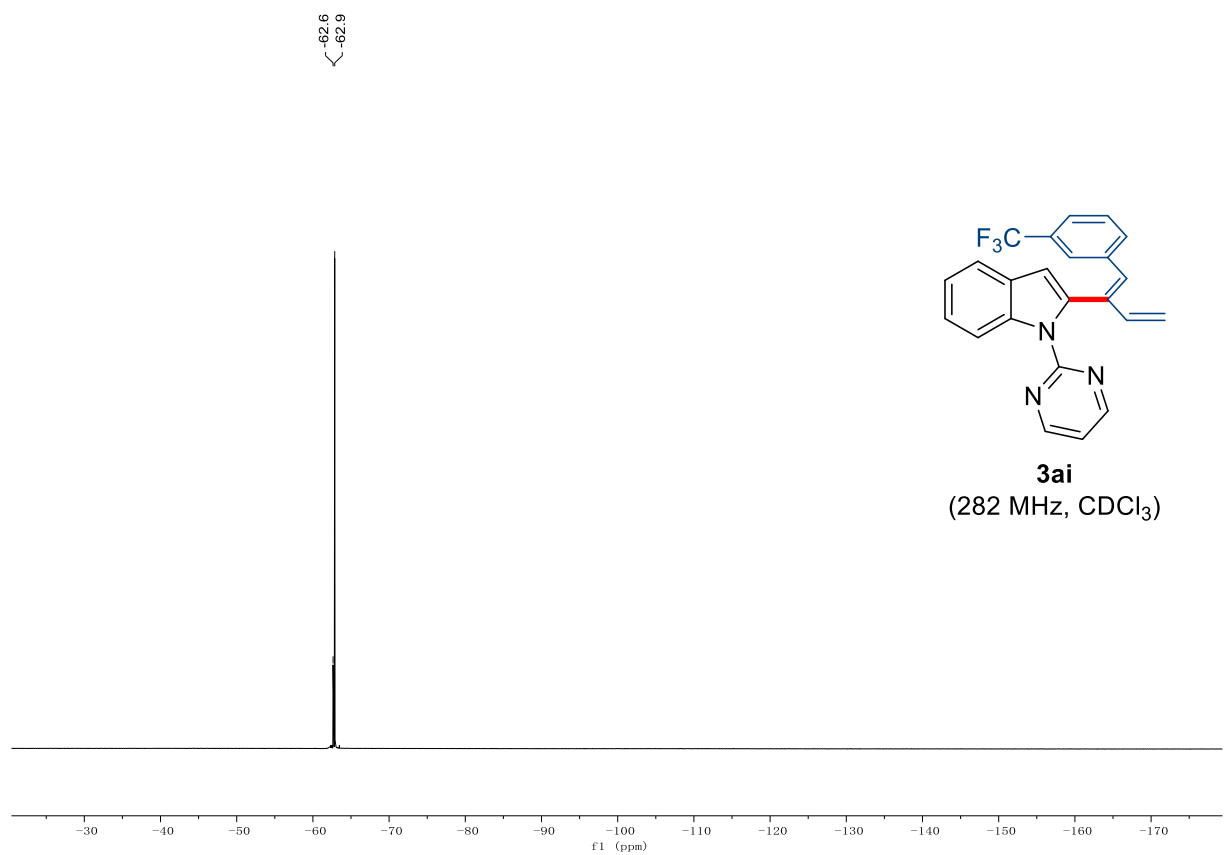





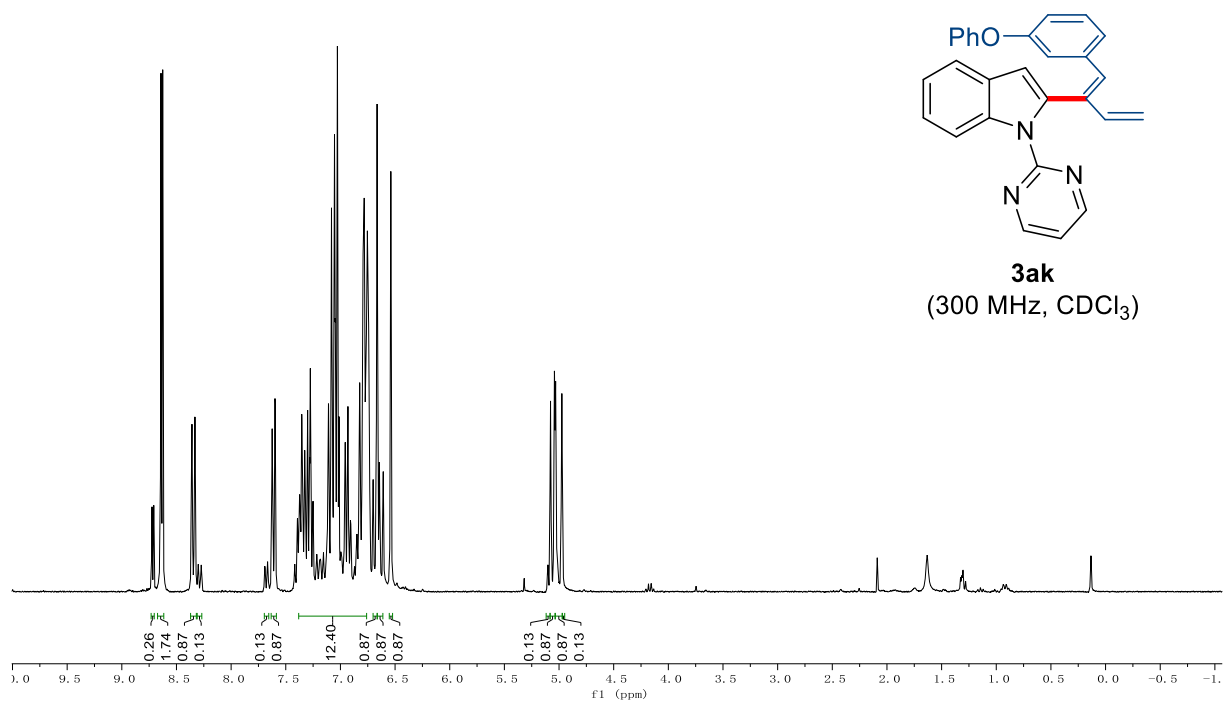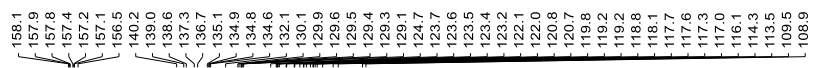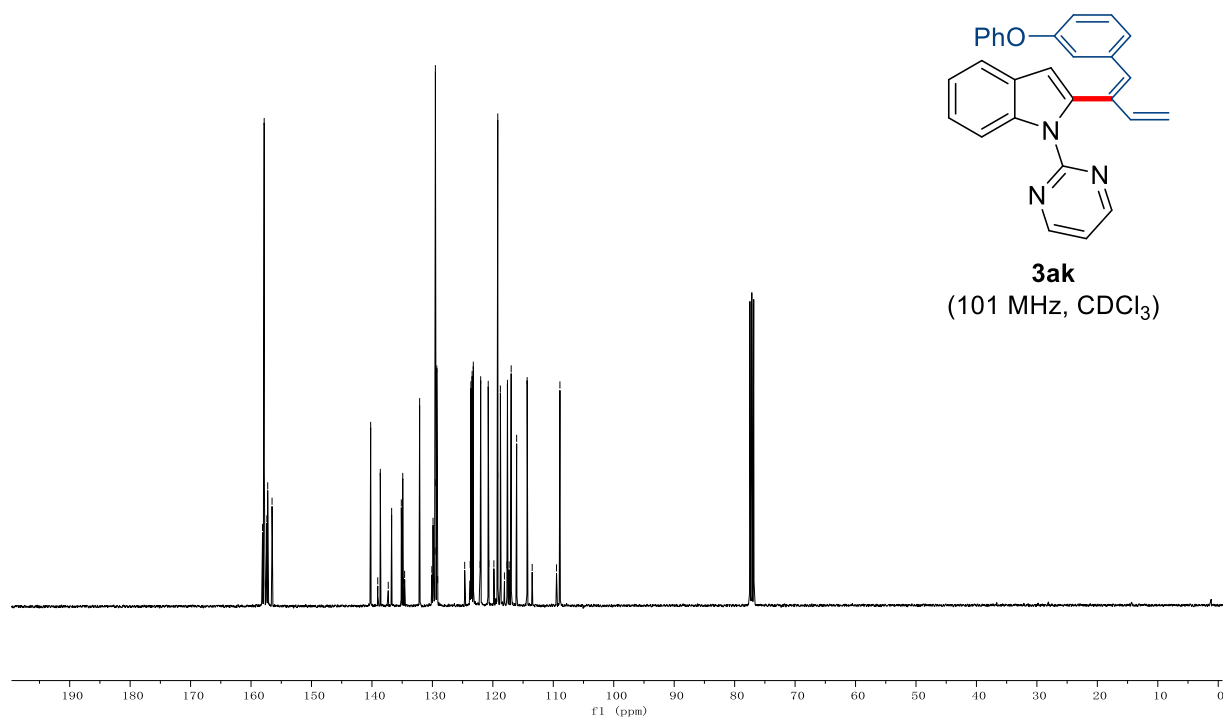

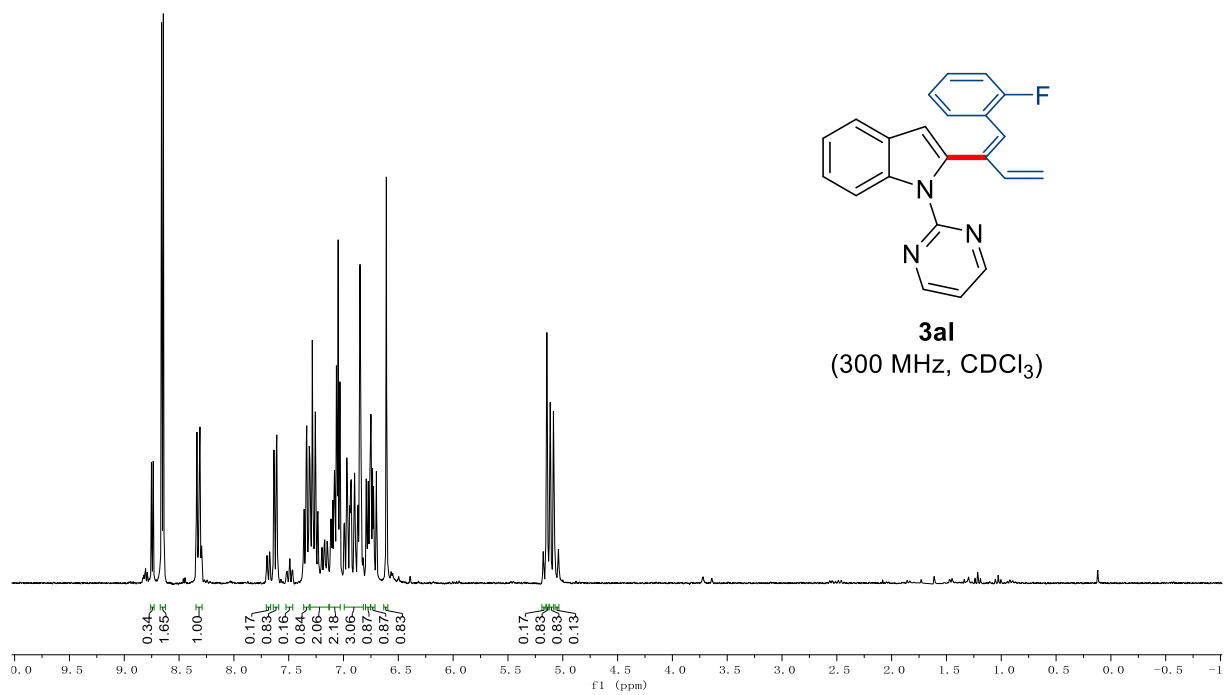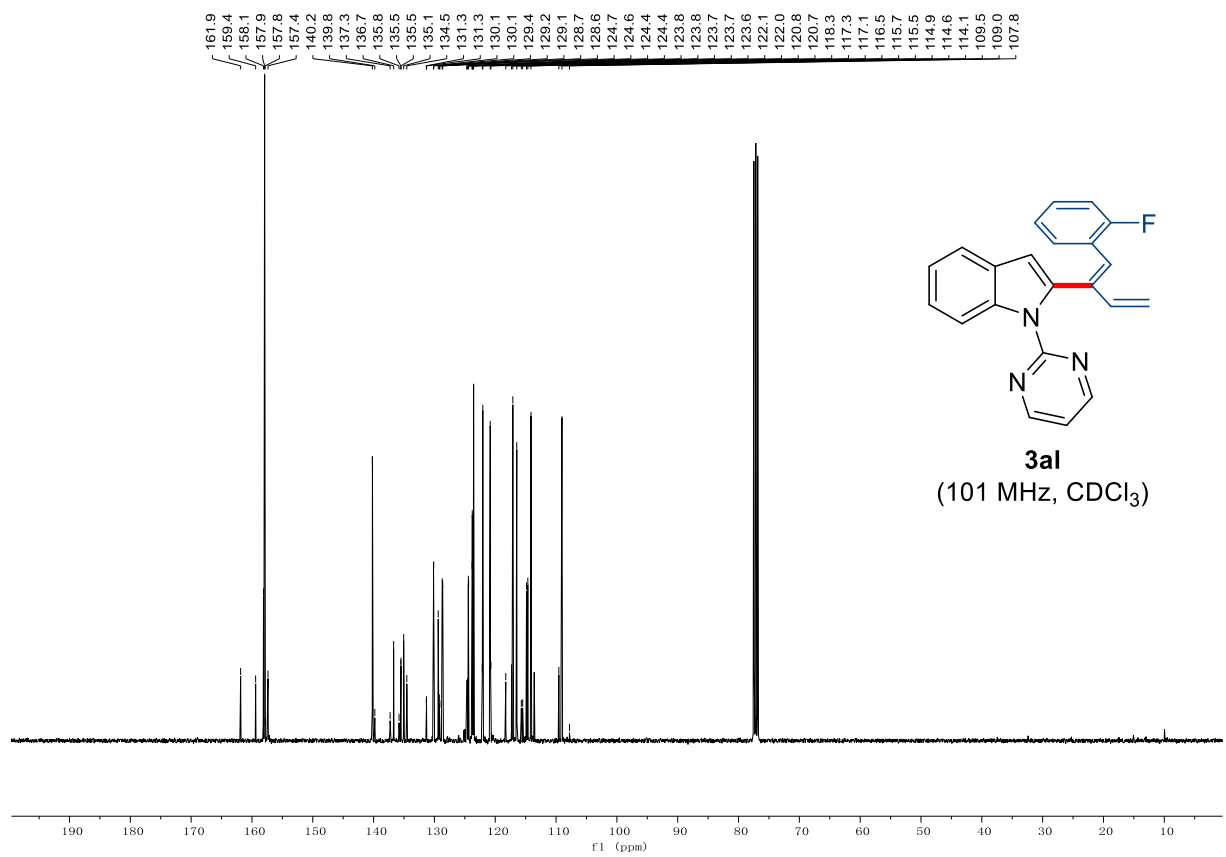



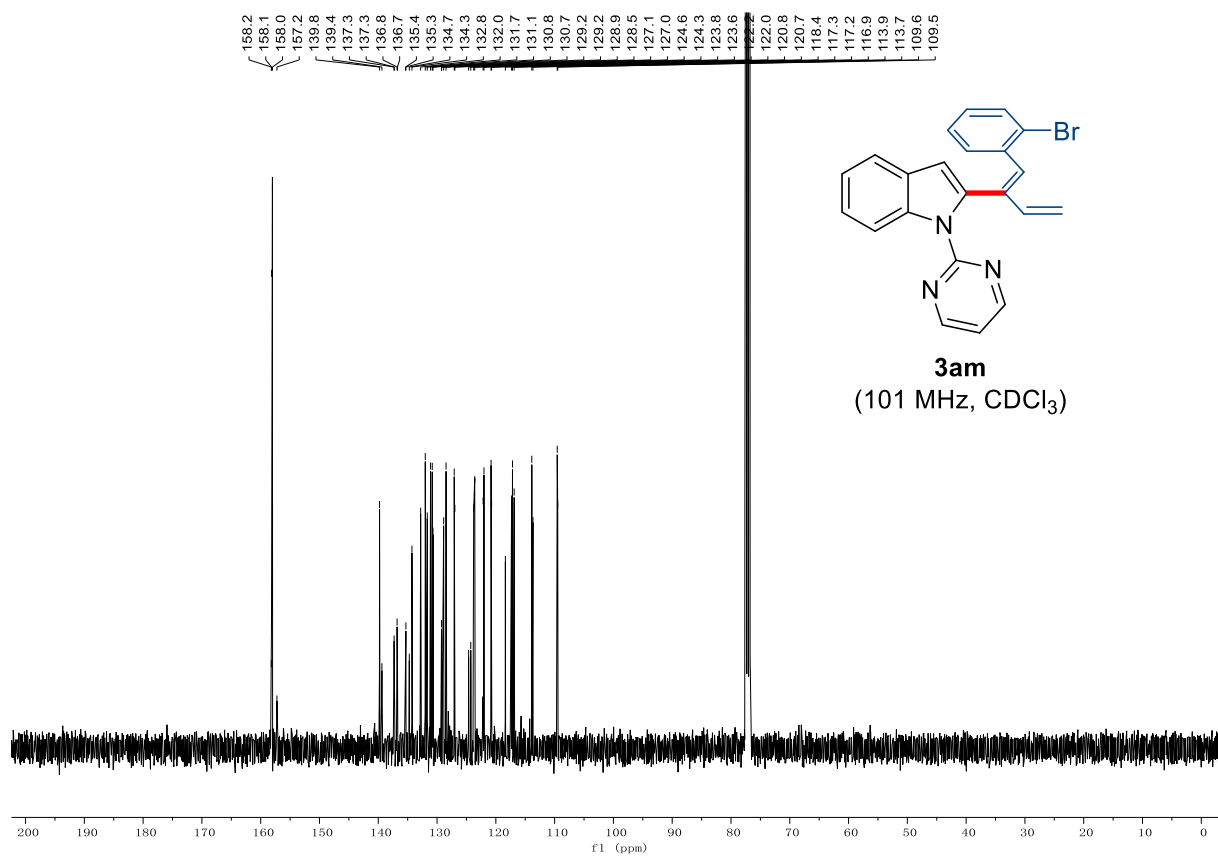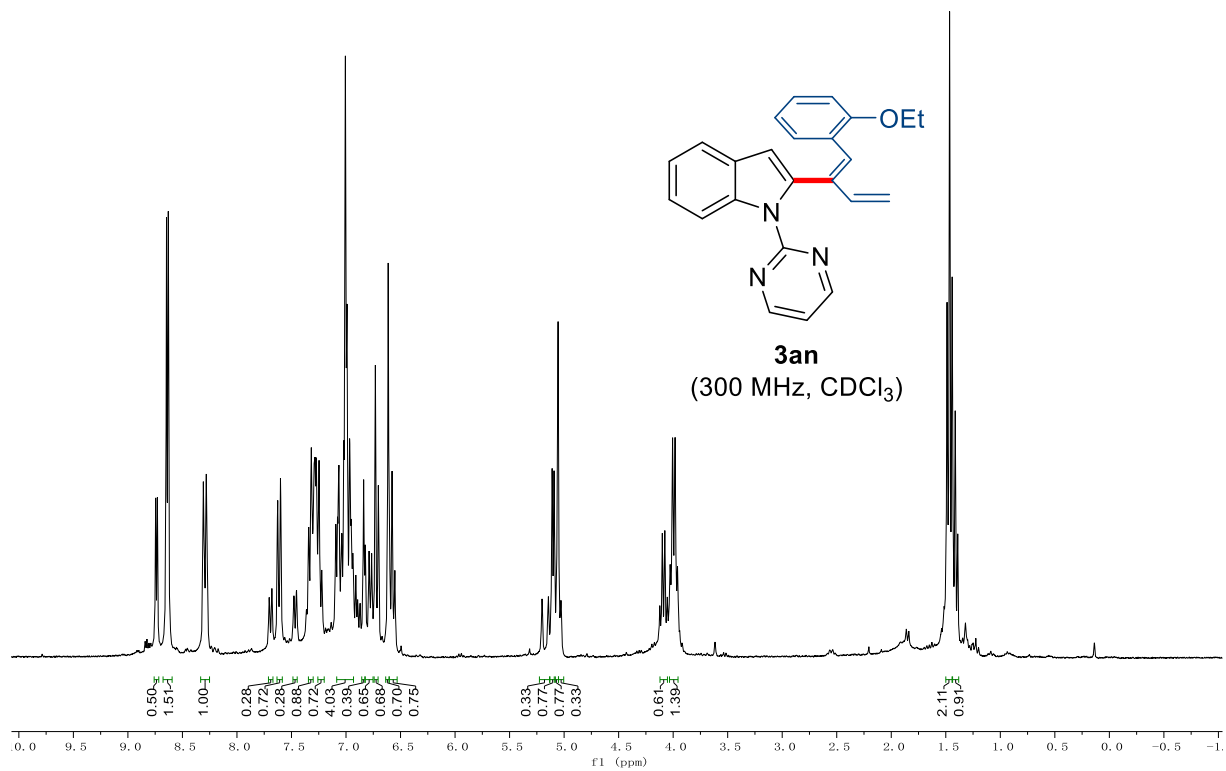

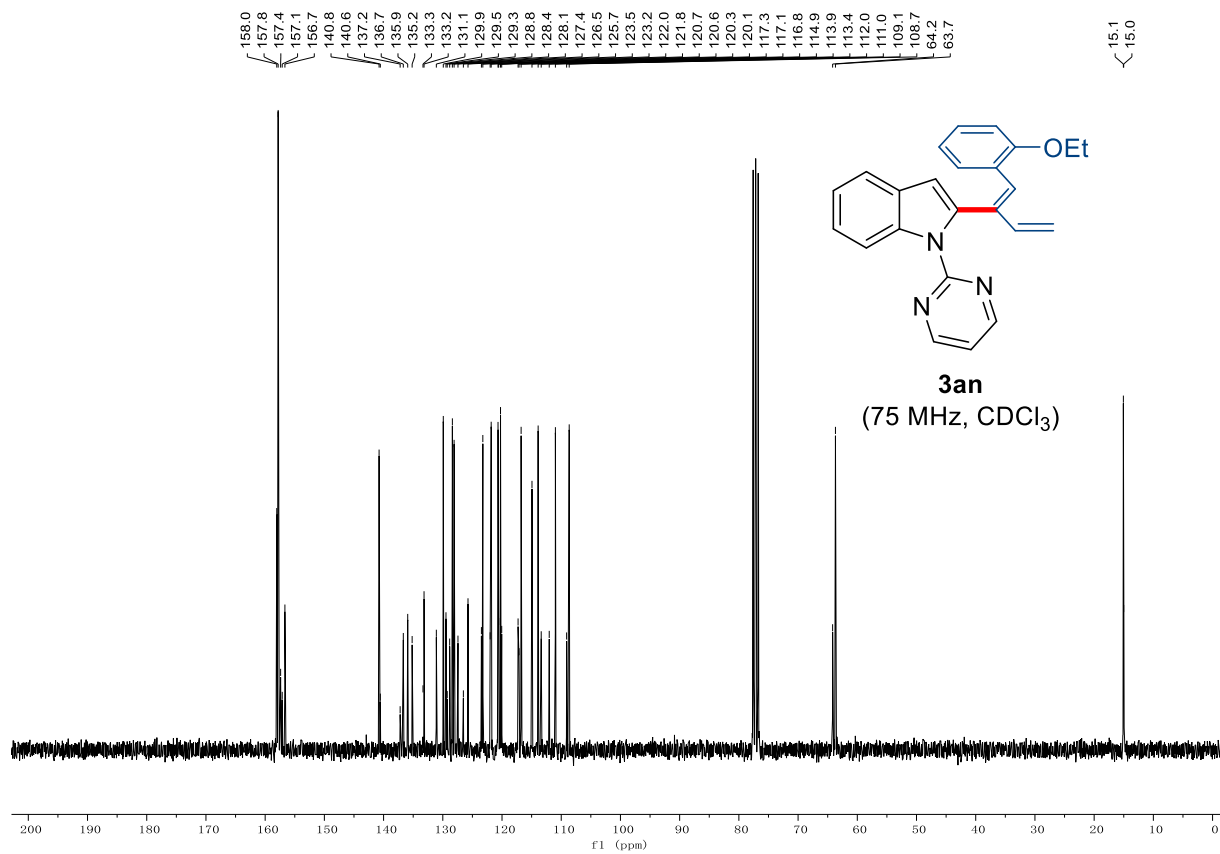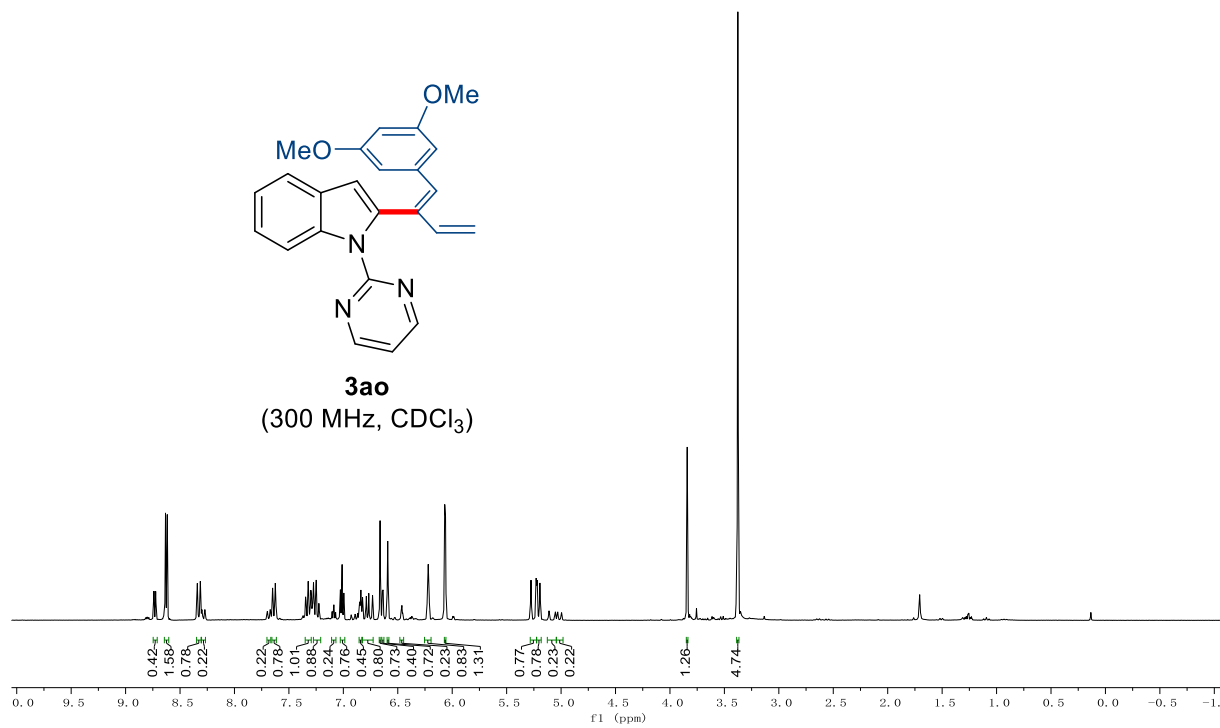

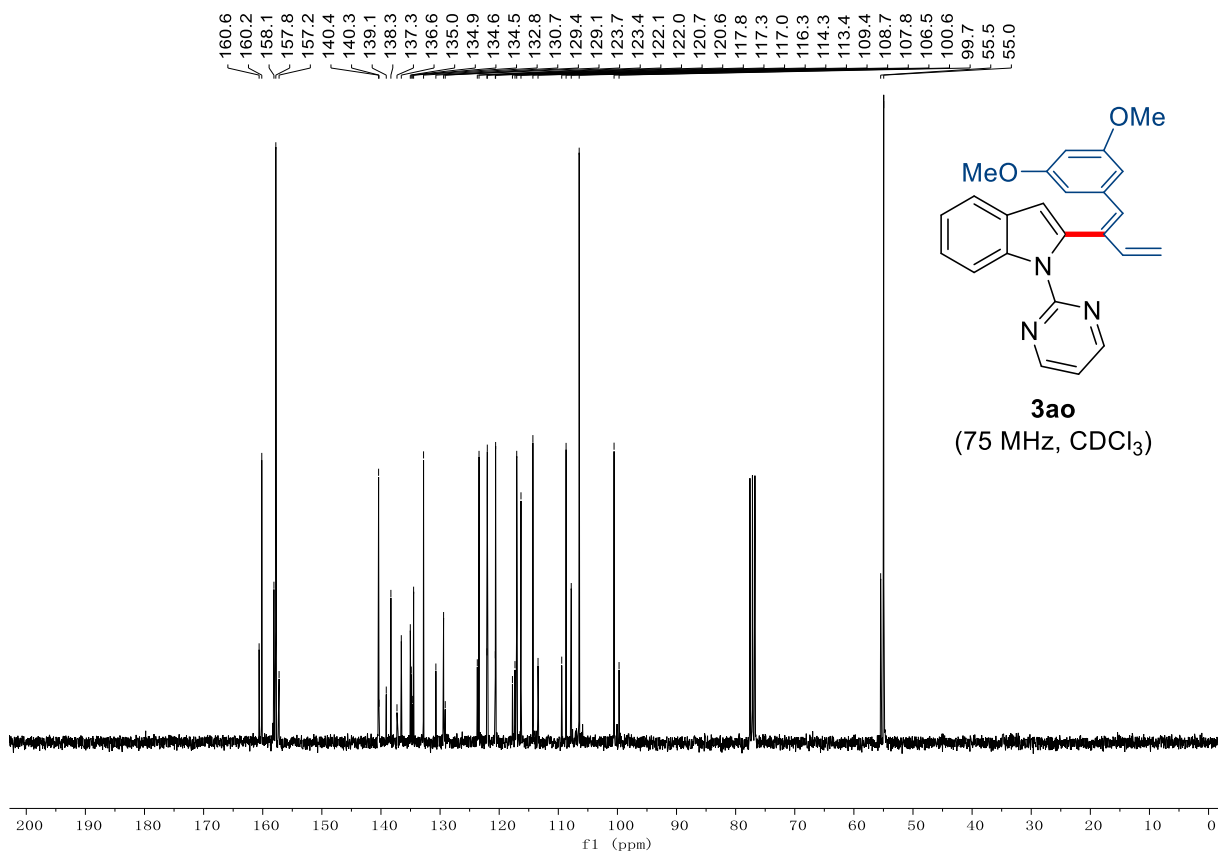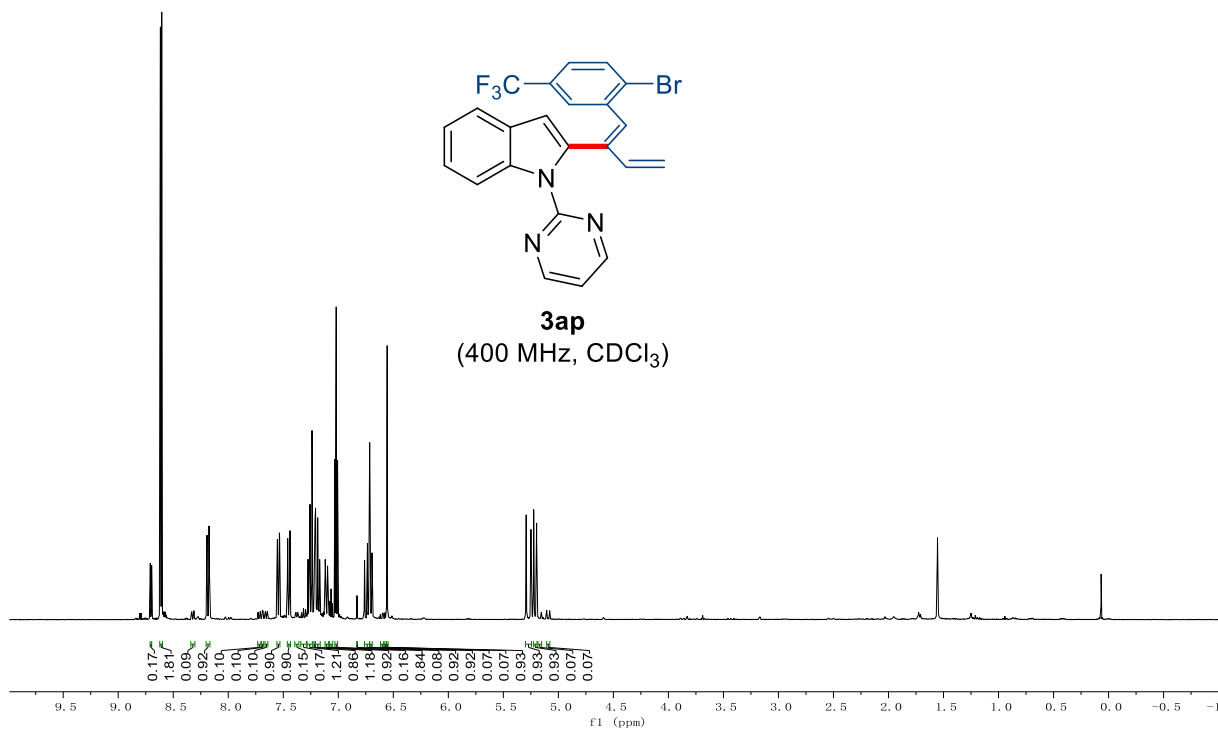

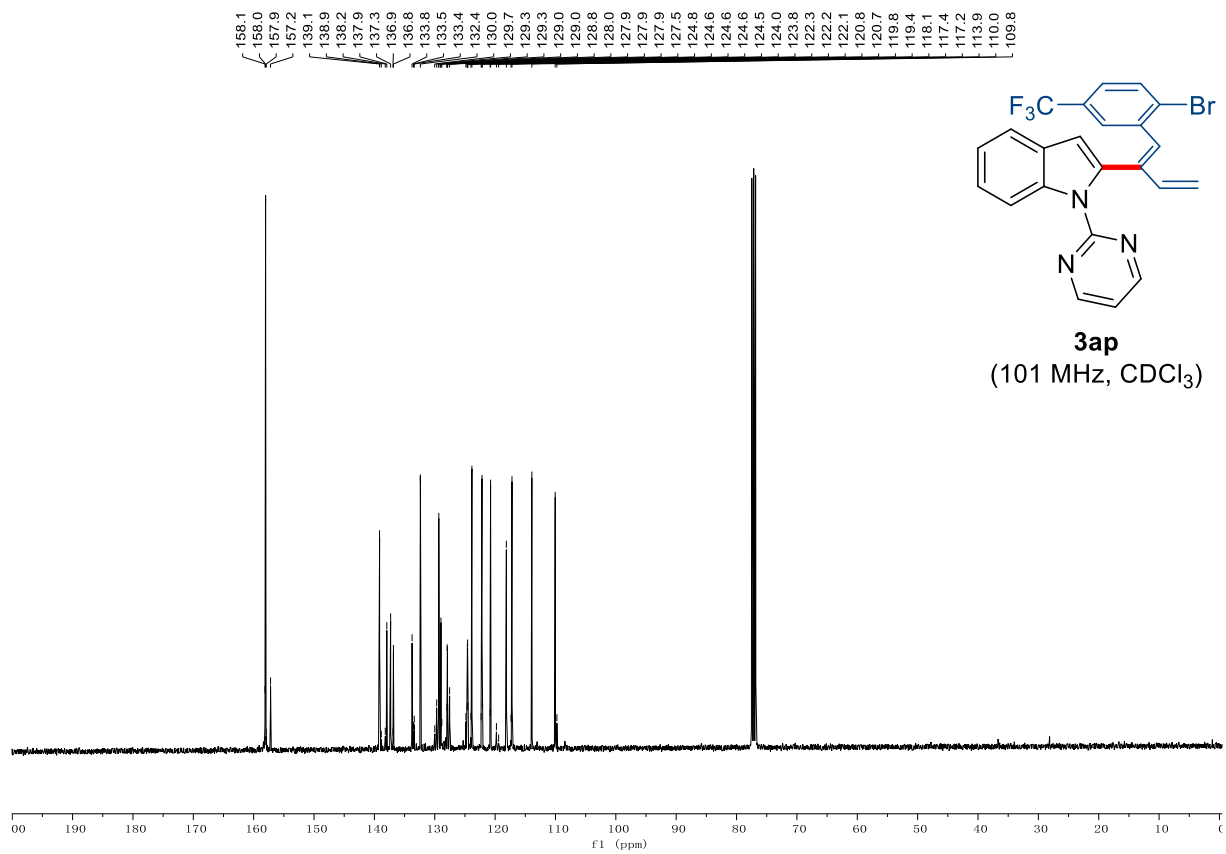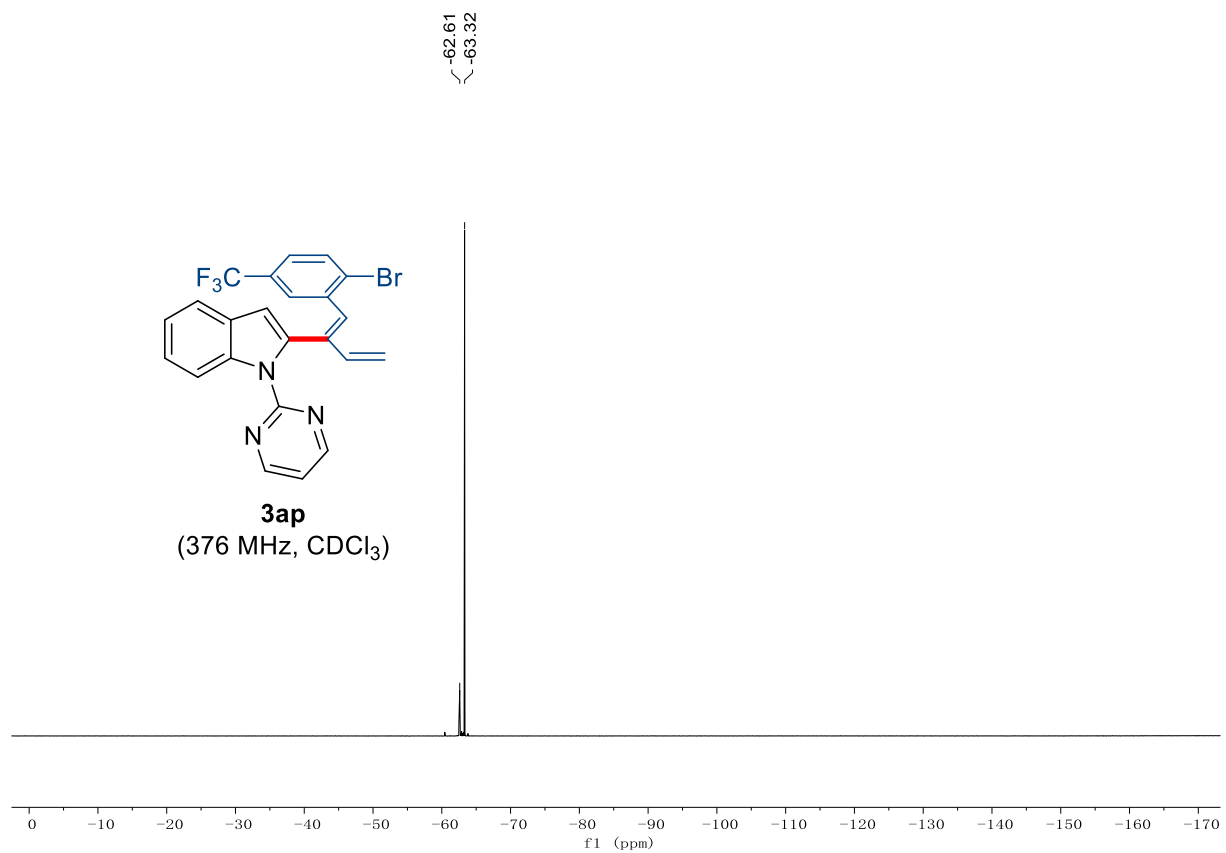



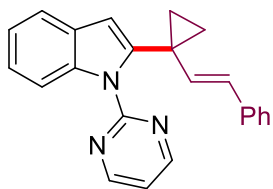

**5aa**  
(300 MHz, CDCl<sub>3</sub>)

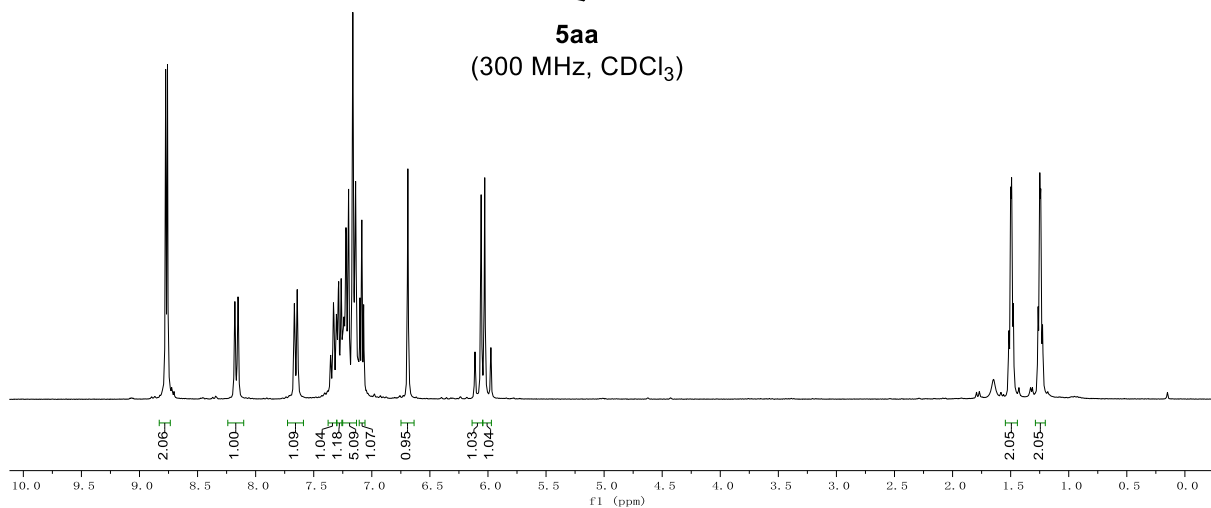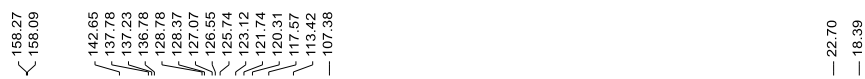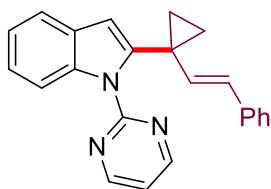

**5aa**  
(101 MHz, CDCl<sub>3</sub>)

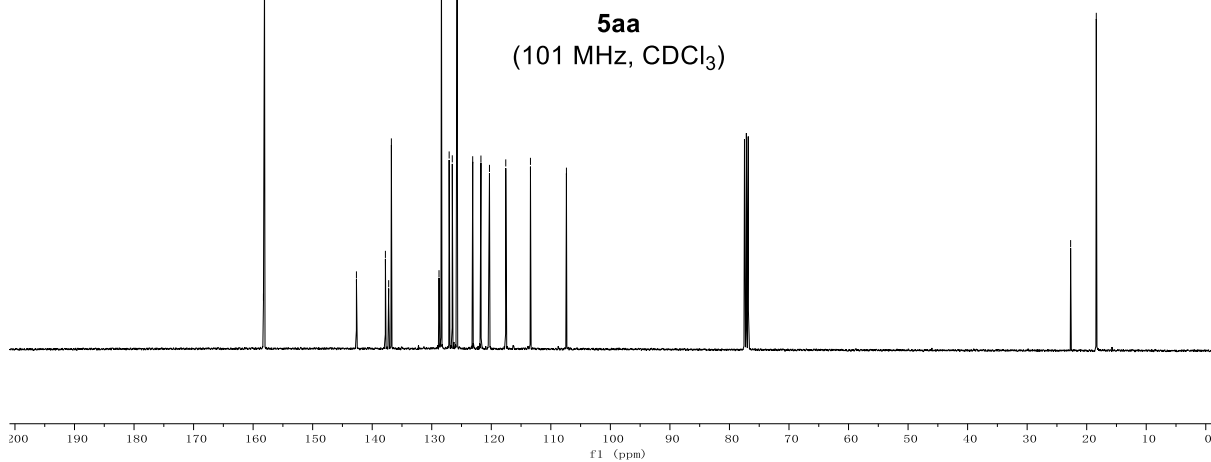

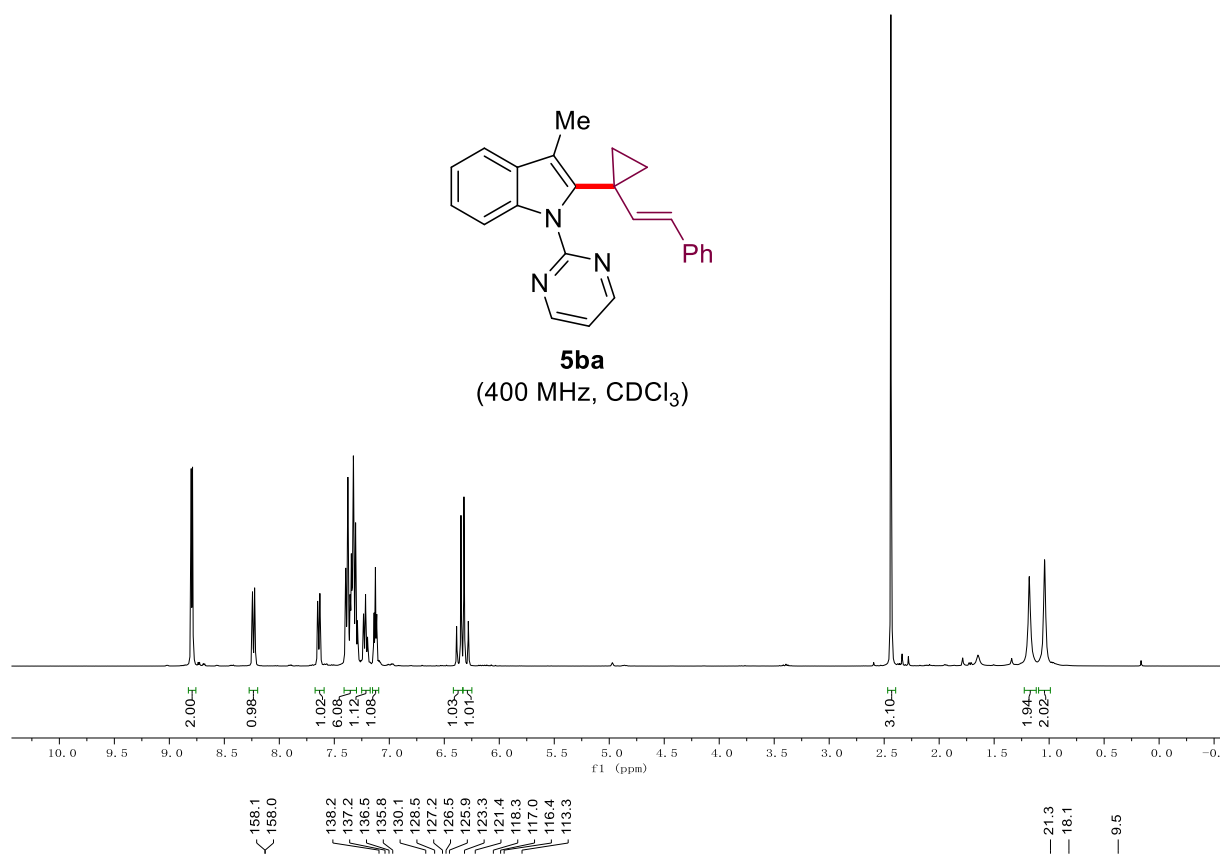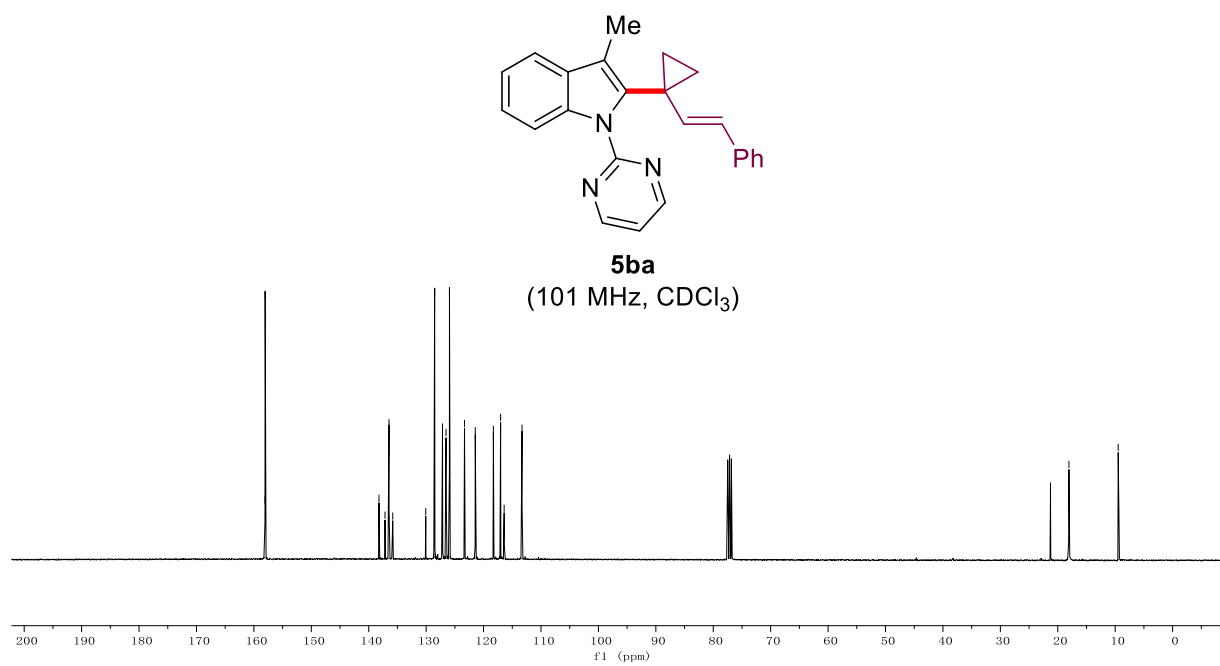

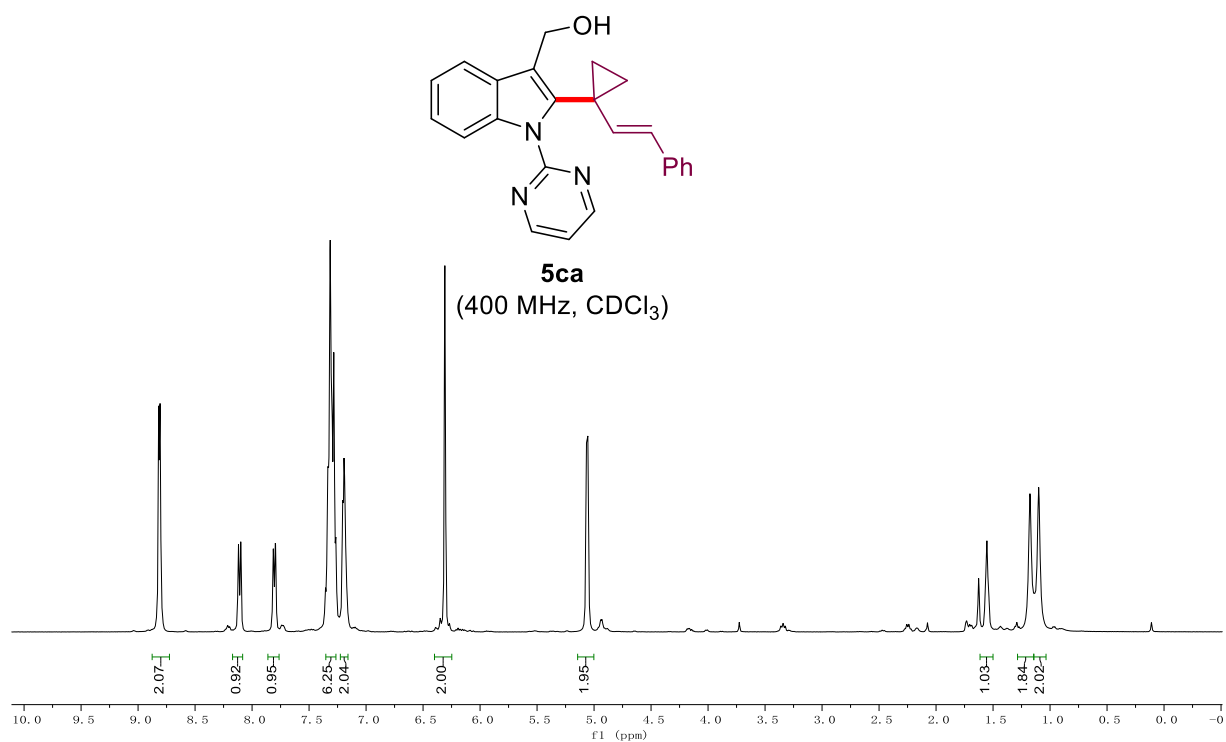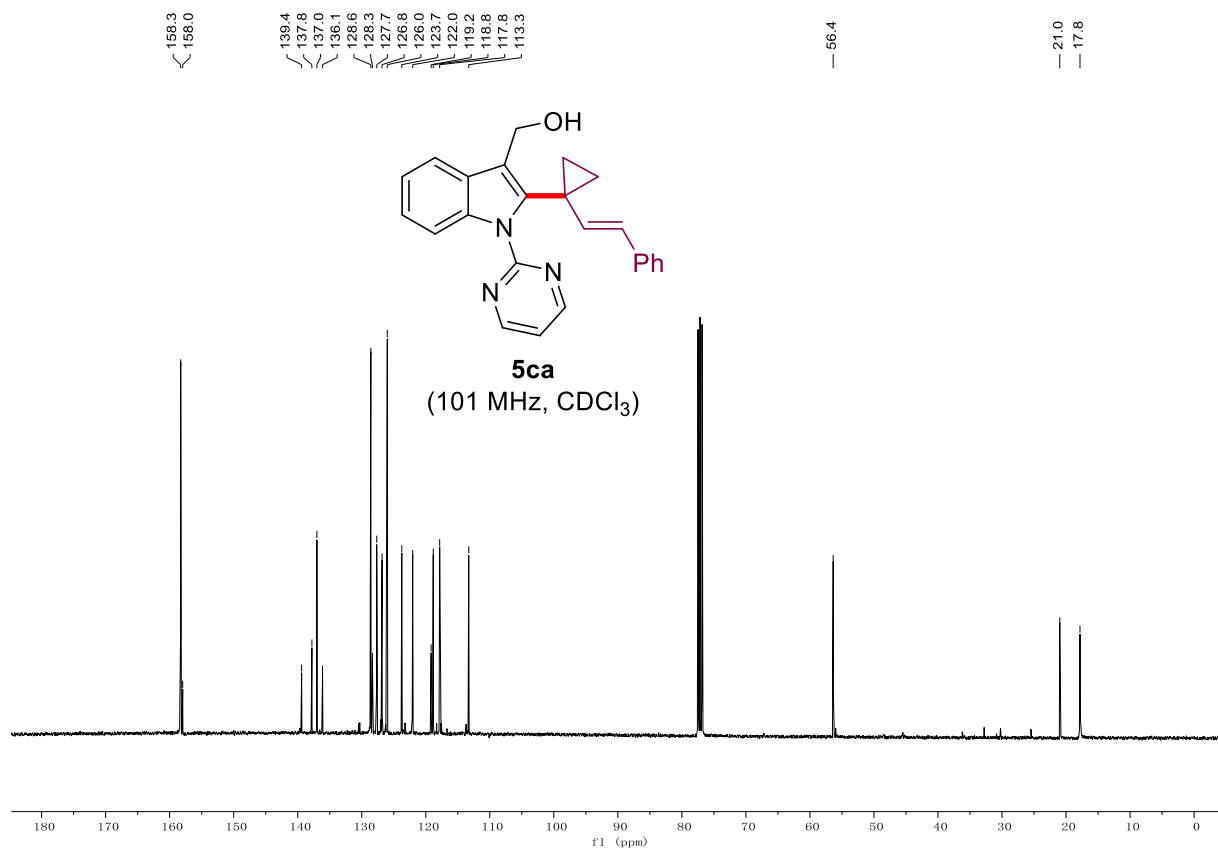

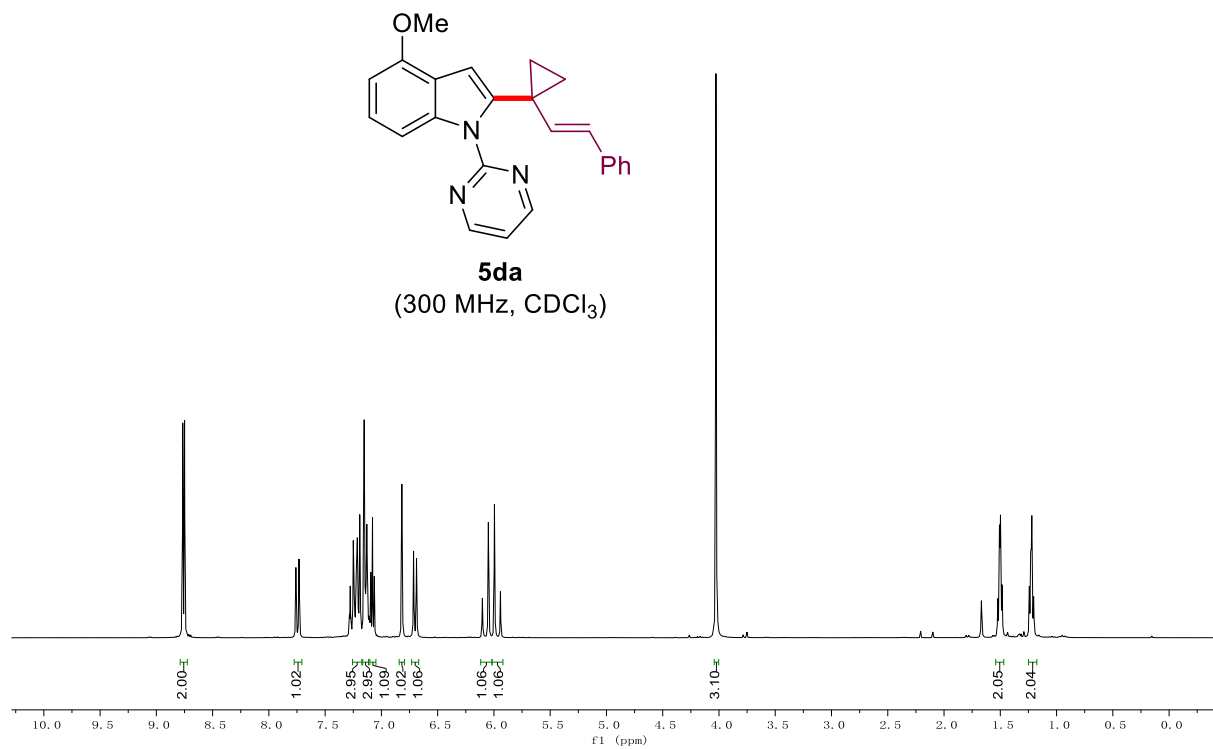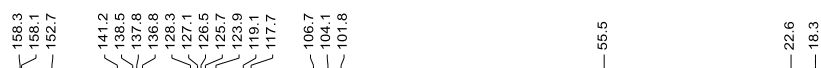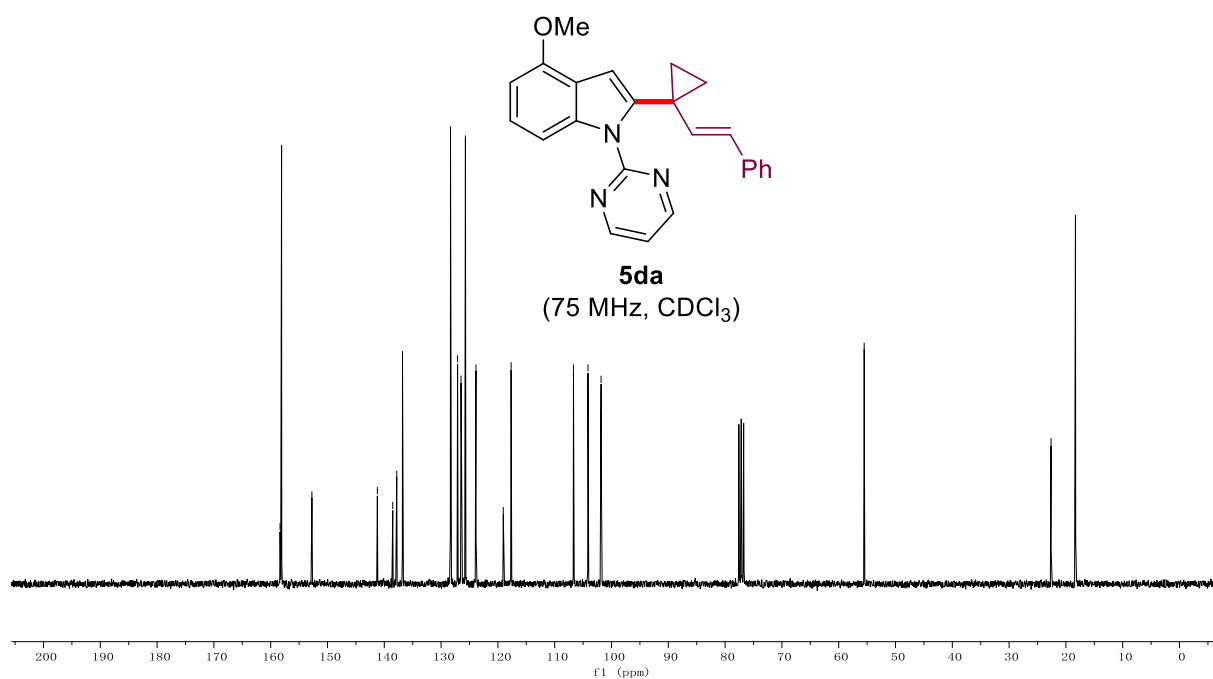

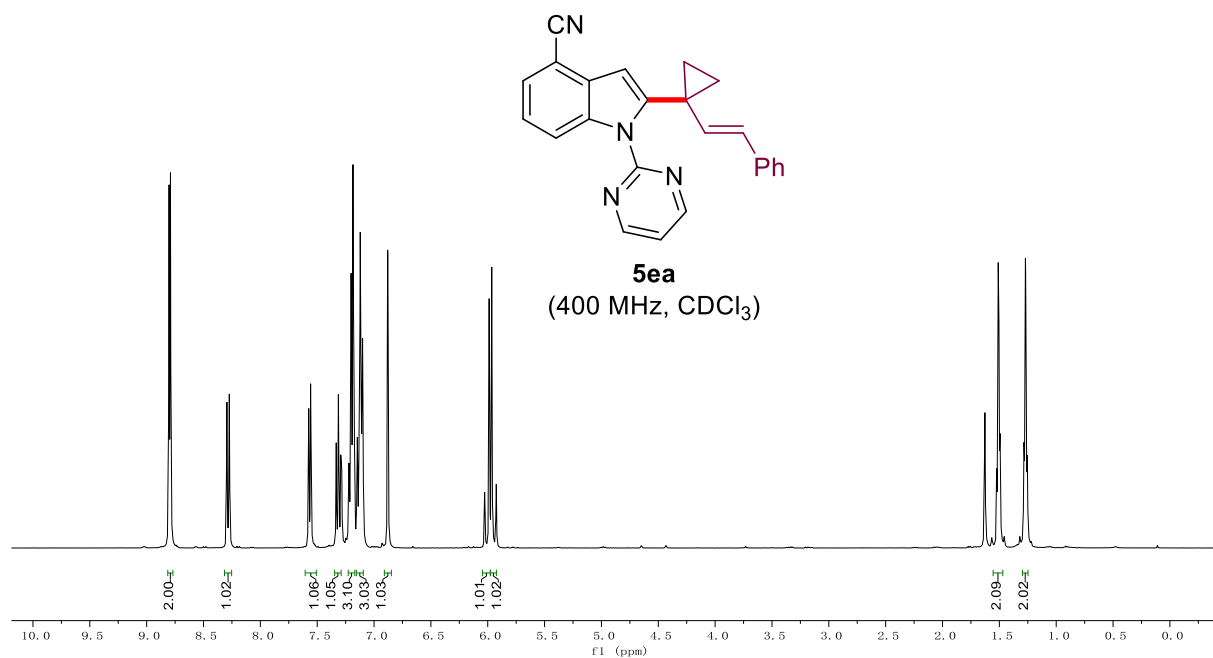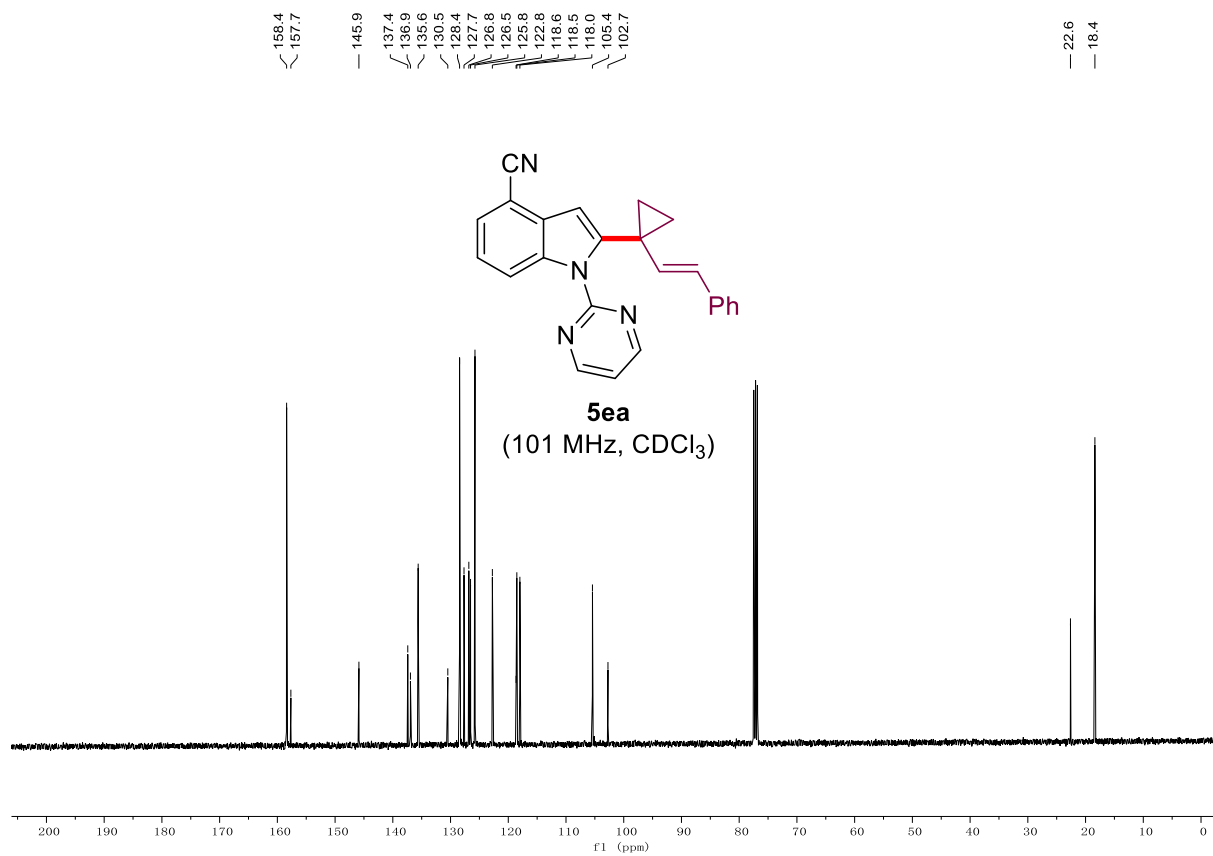

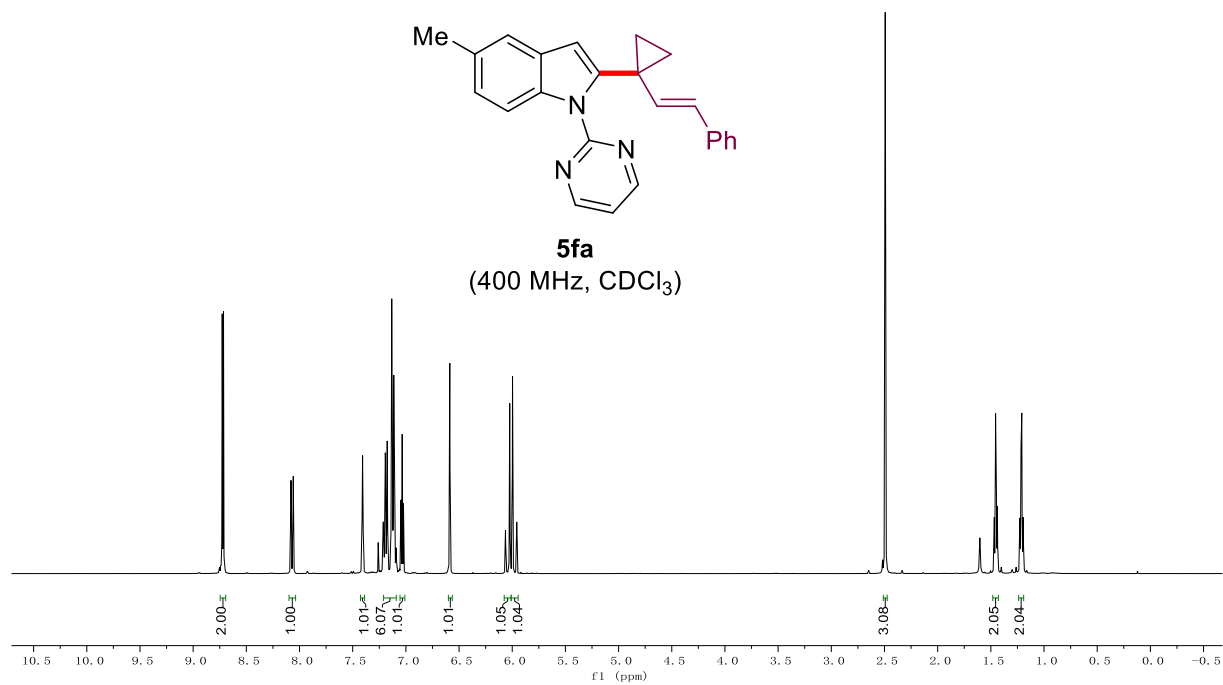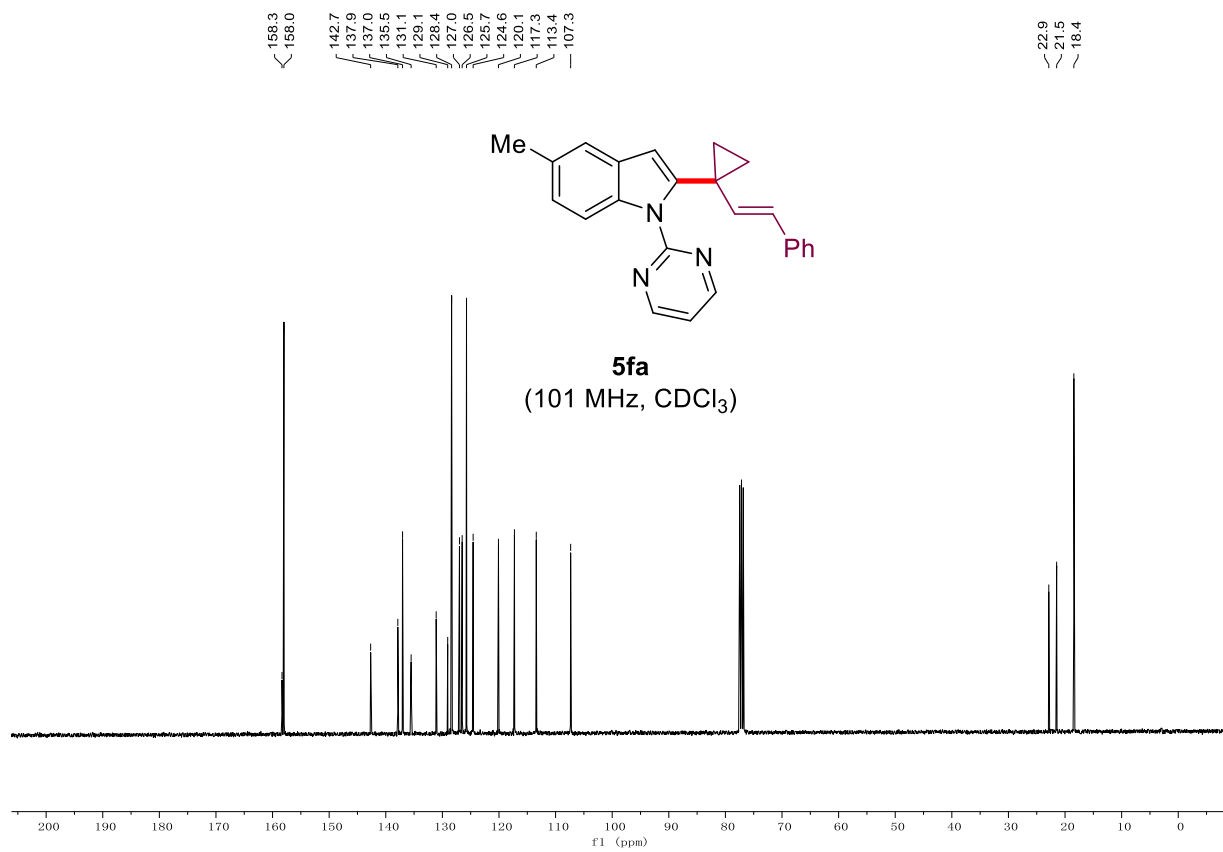

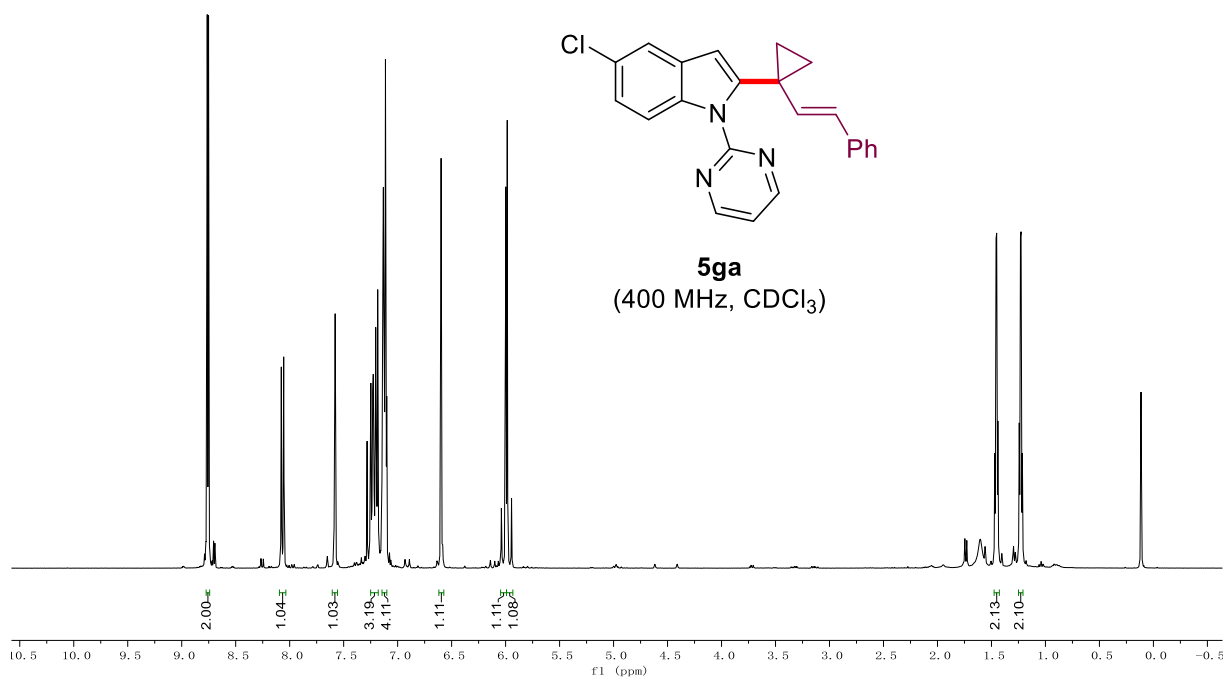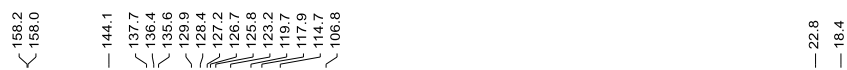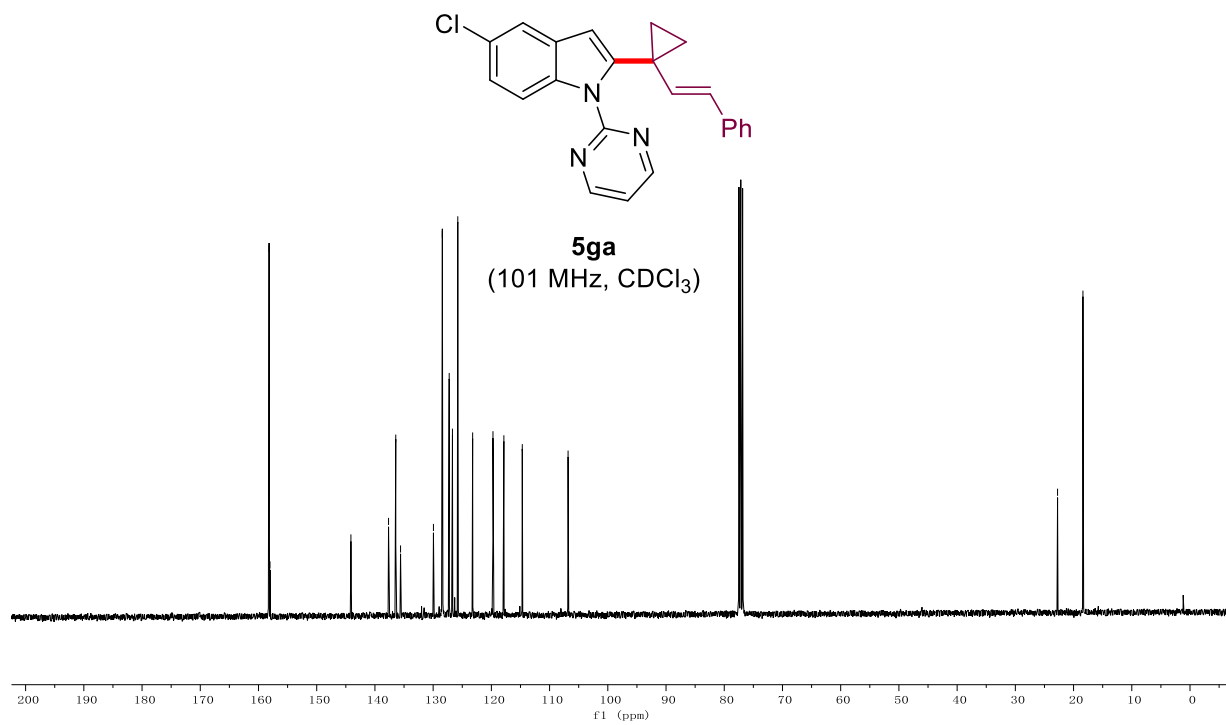

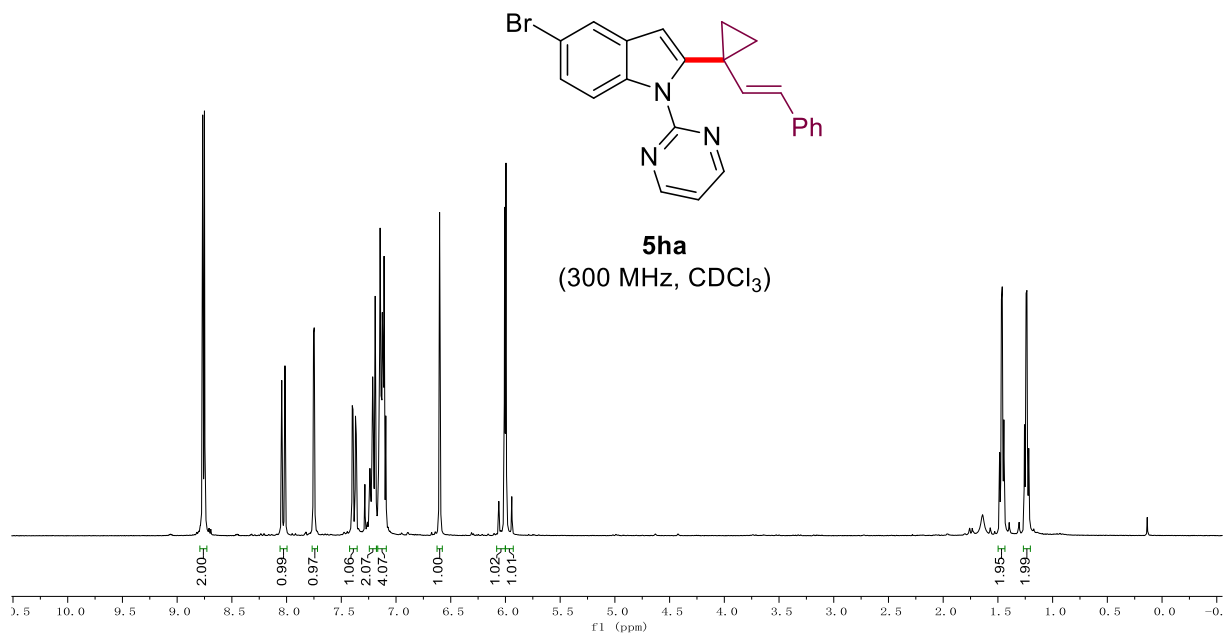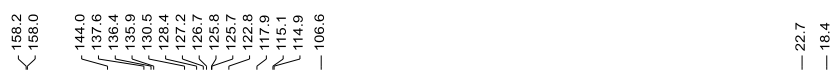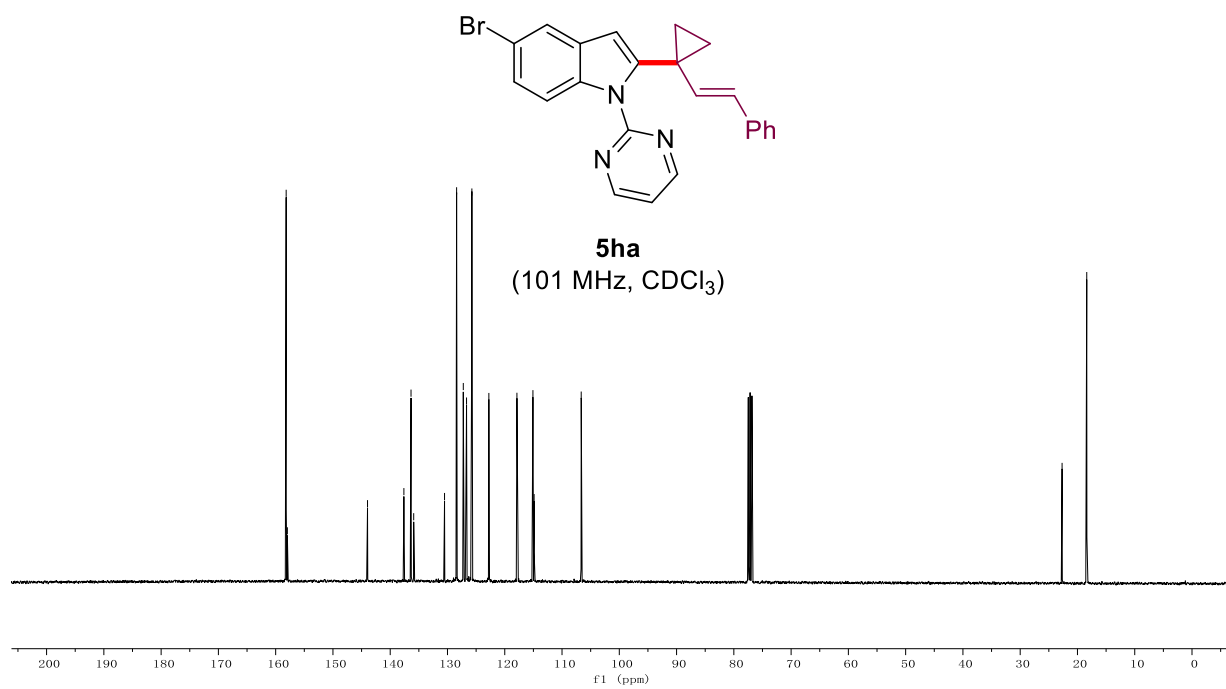



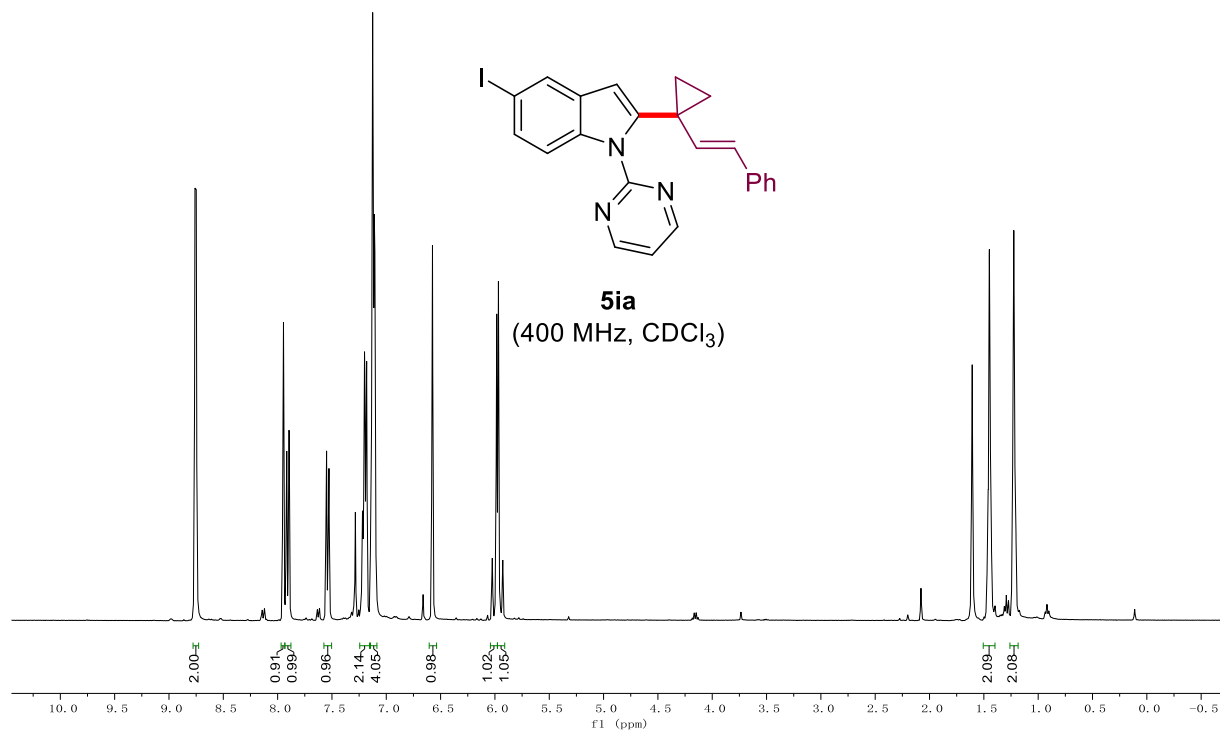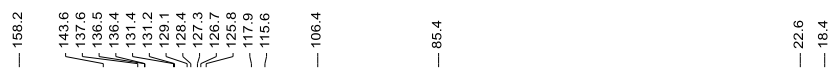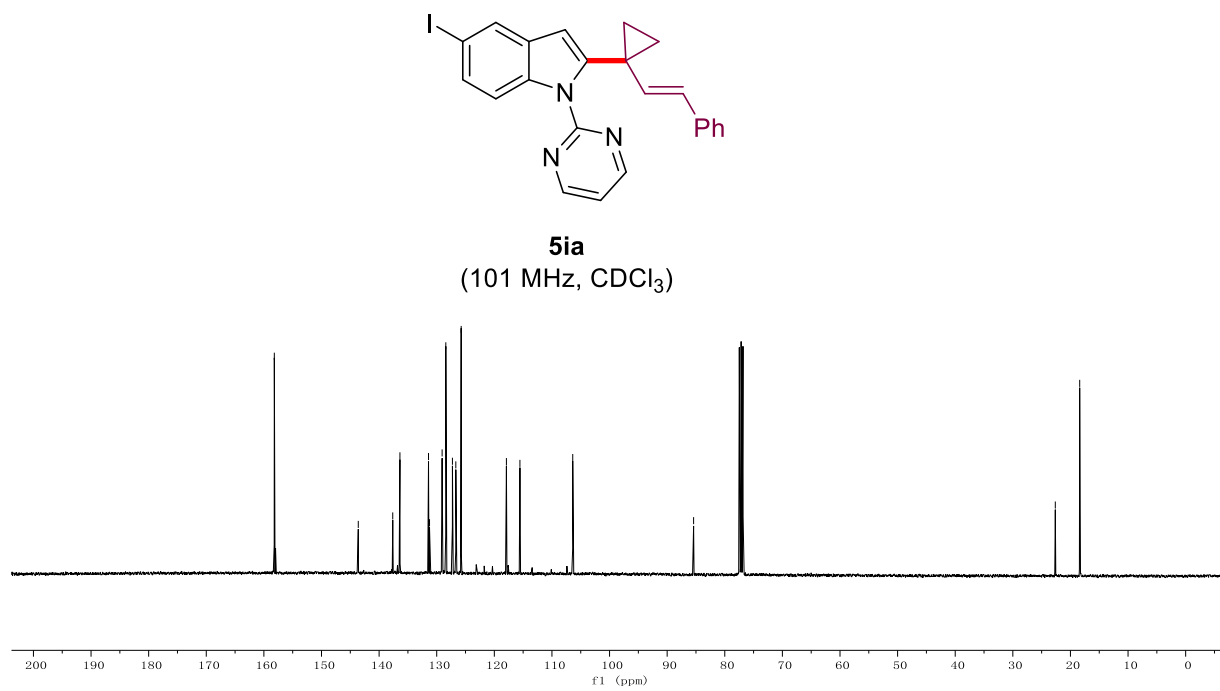

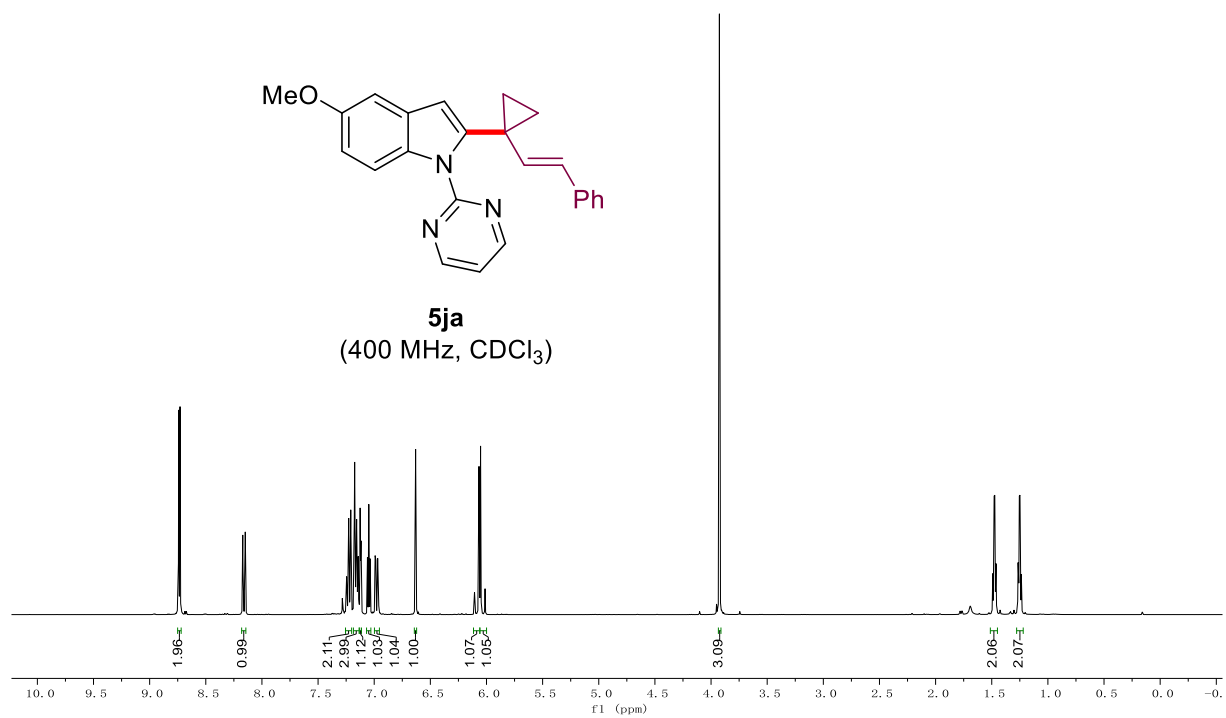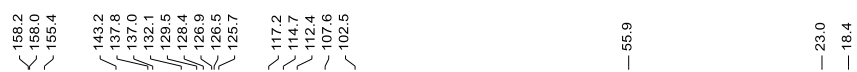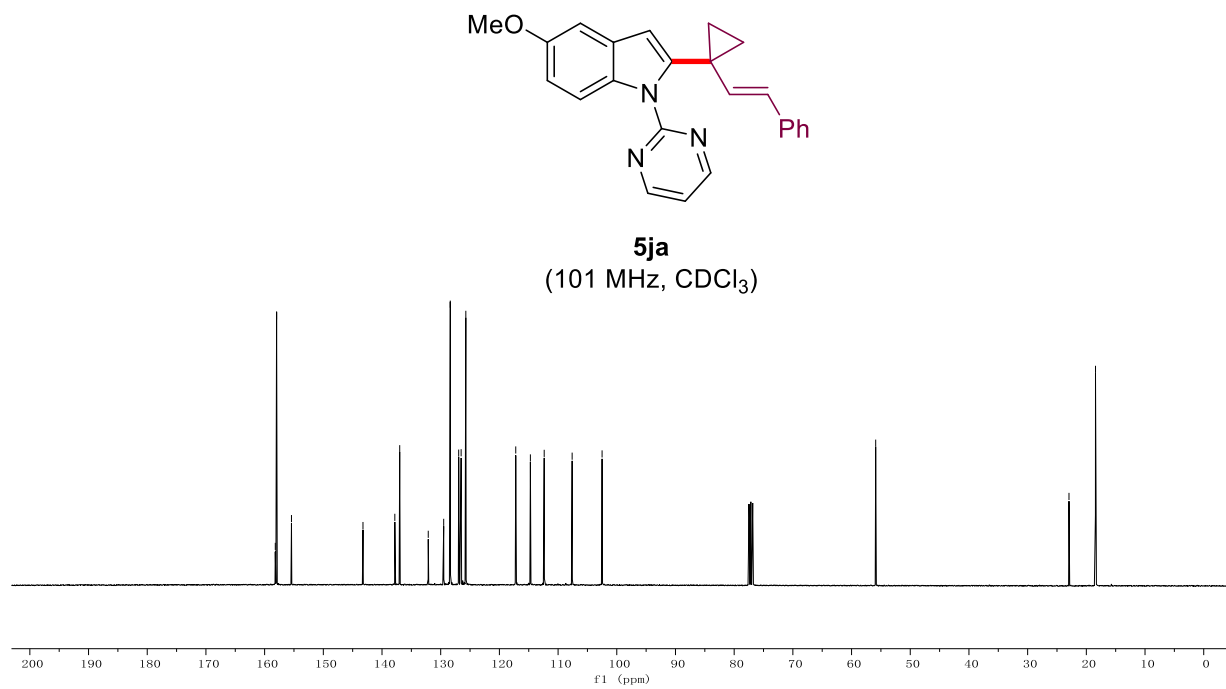

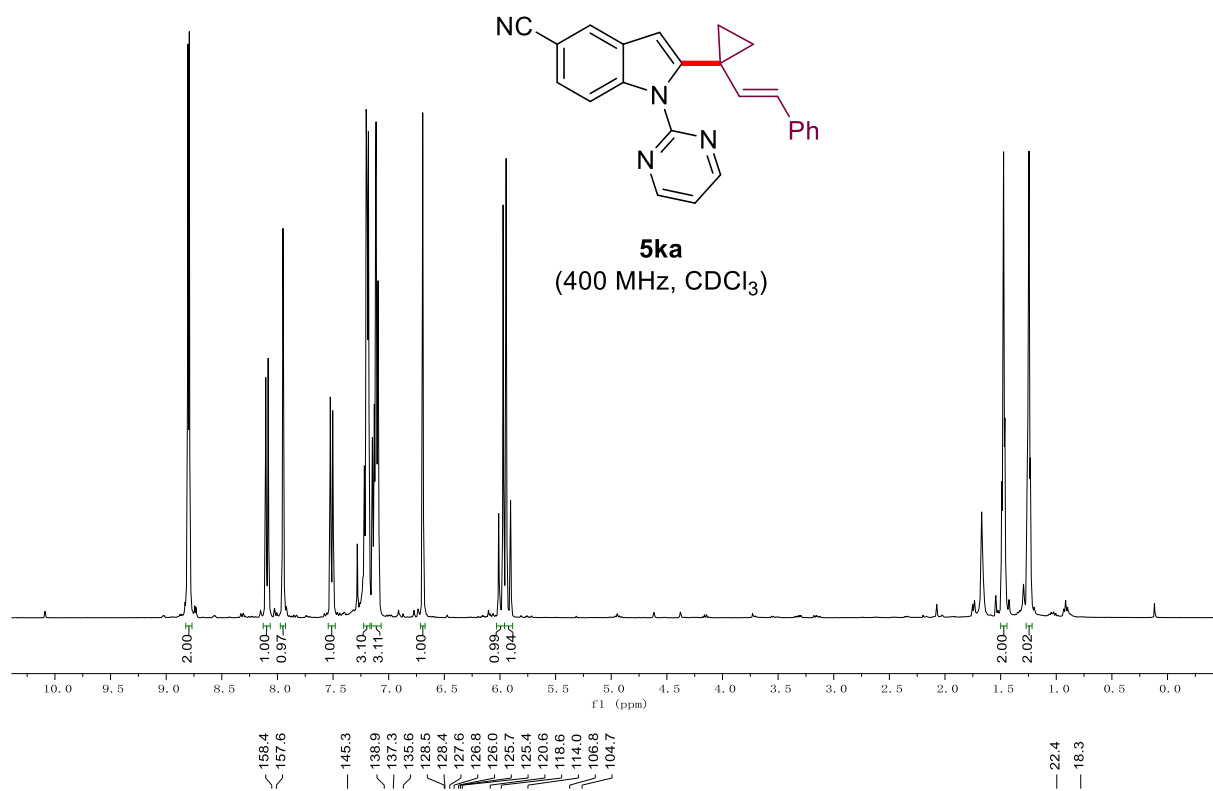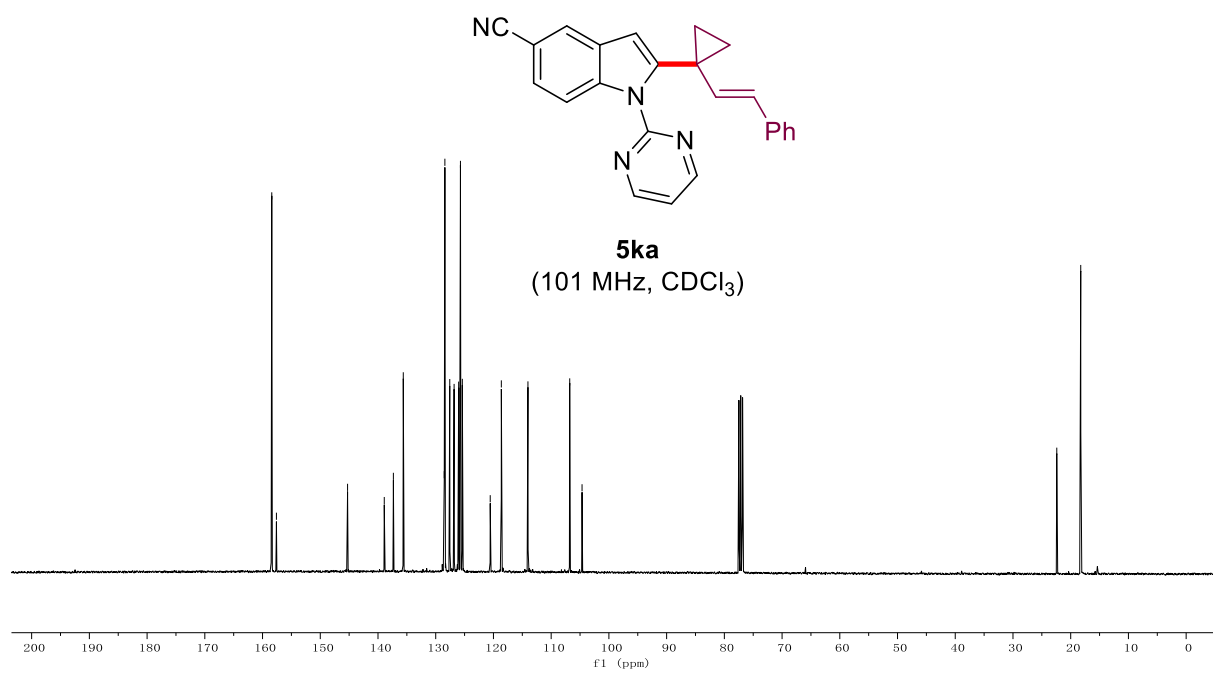

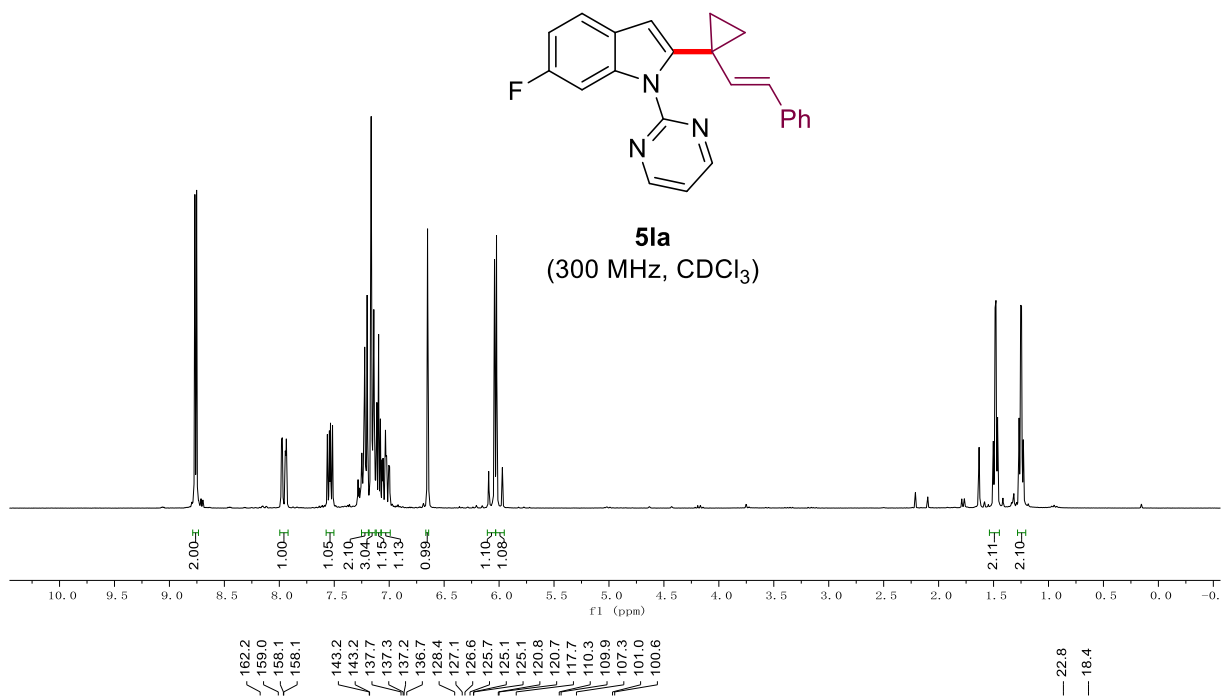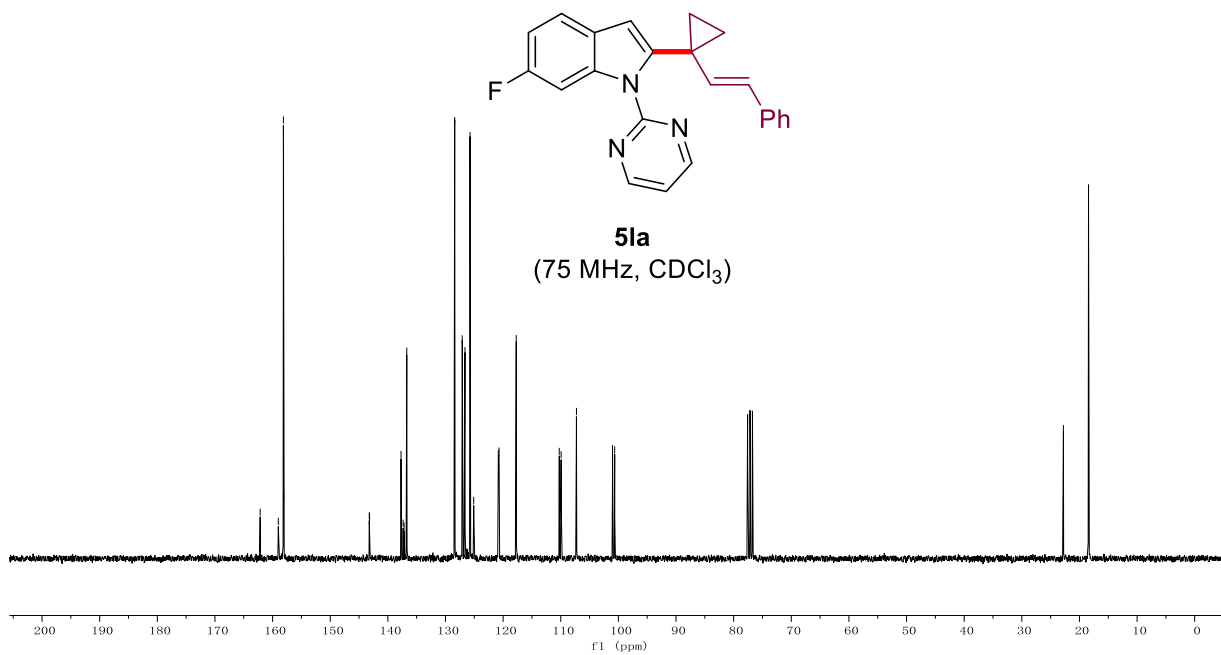

-119.43  
-119.45  
-119.47  
-119.49  
-119.50  
-119.52

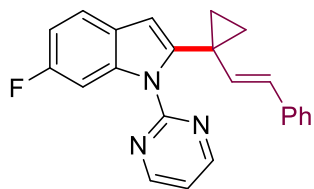

**5la**  
(282 MHz, CDCl<sub>3</sub>)

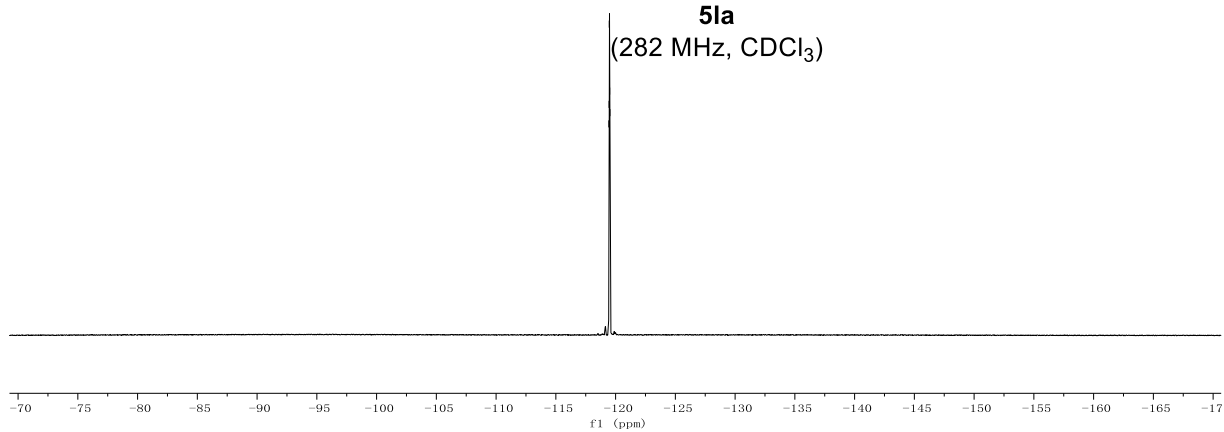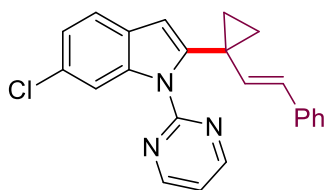

**5ma**  
(300 MHz, CDCl<sub>3</sub>)

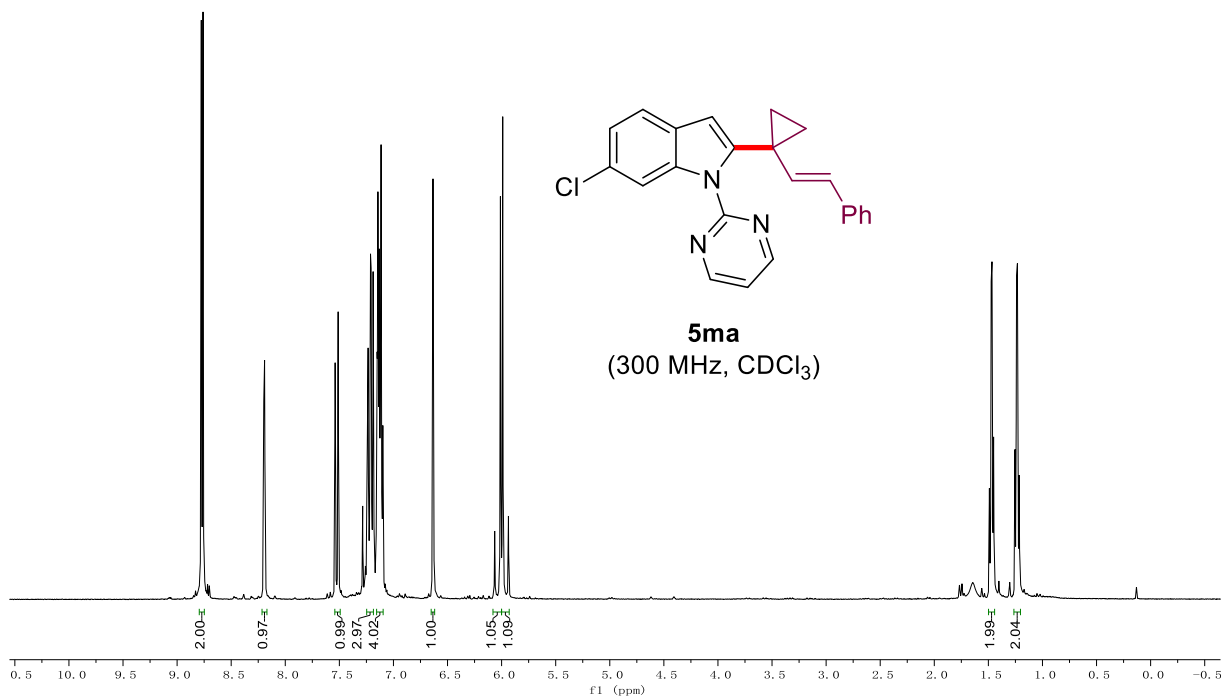

158.2  
157.9  
143.5  
137.6  
137.5  
136.5  
129.0  
128.4  
127.3  
127.2  
126.7  
125.7  
122.3  
121.0  
117.9  
113.7  
107.2

22.7  
18.4

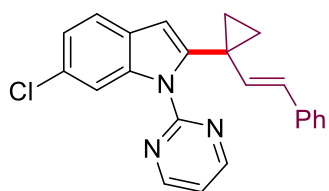

**5ma**  
(101 MHz, CDCl<sub>3</sub>)

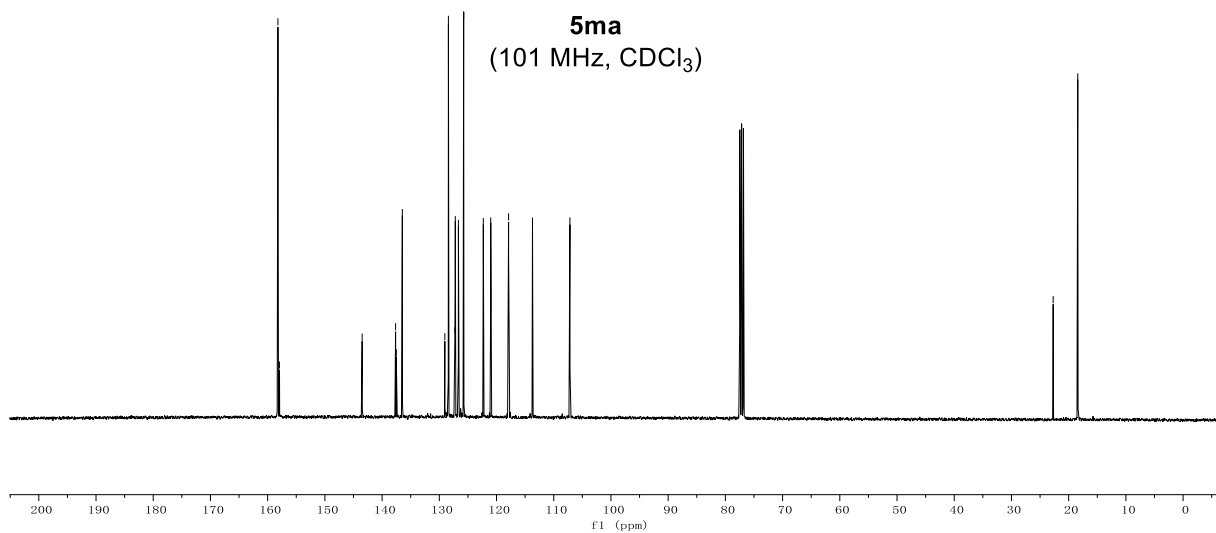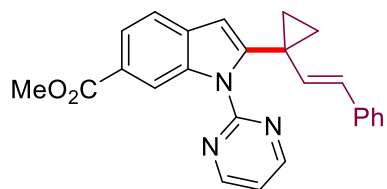

**5na**  
(300 MHz, CDCl<sub>3</sub>)

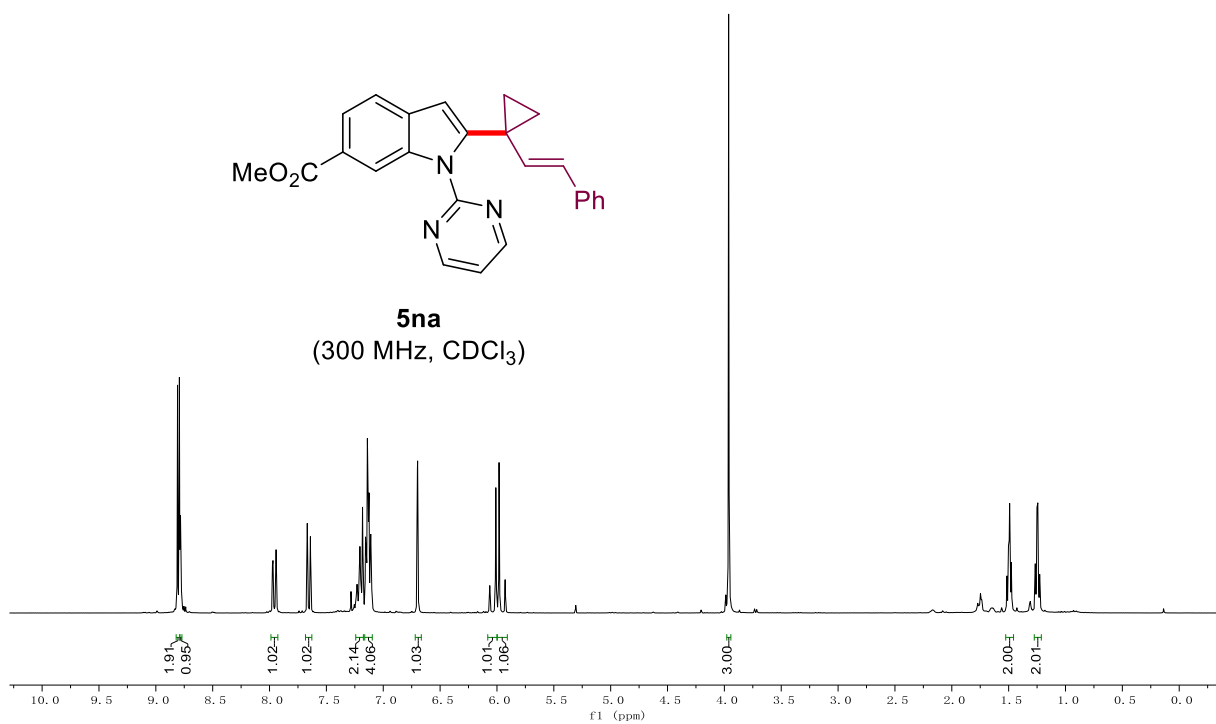

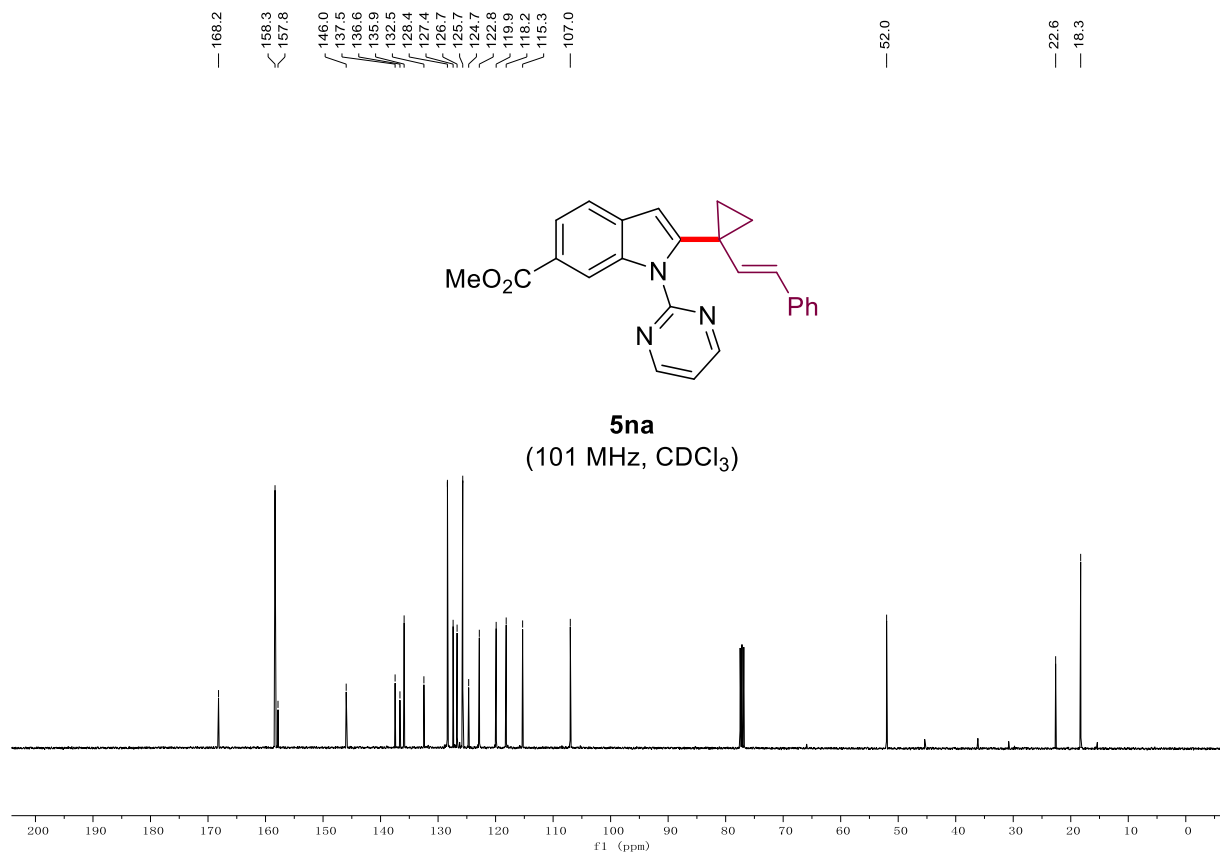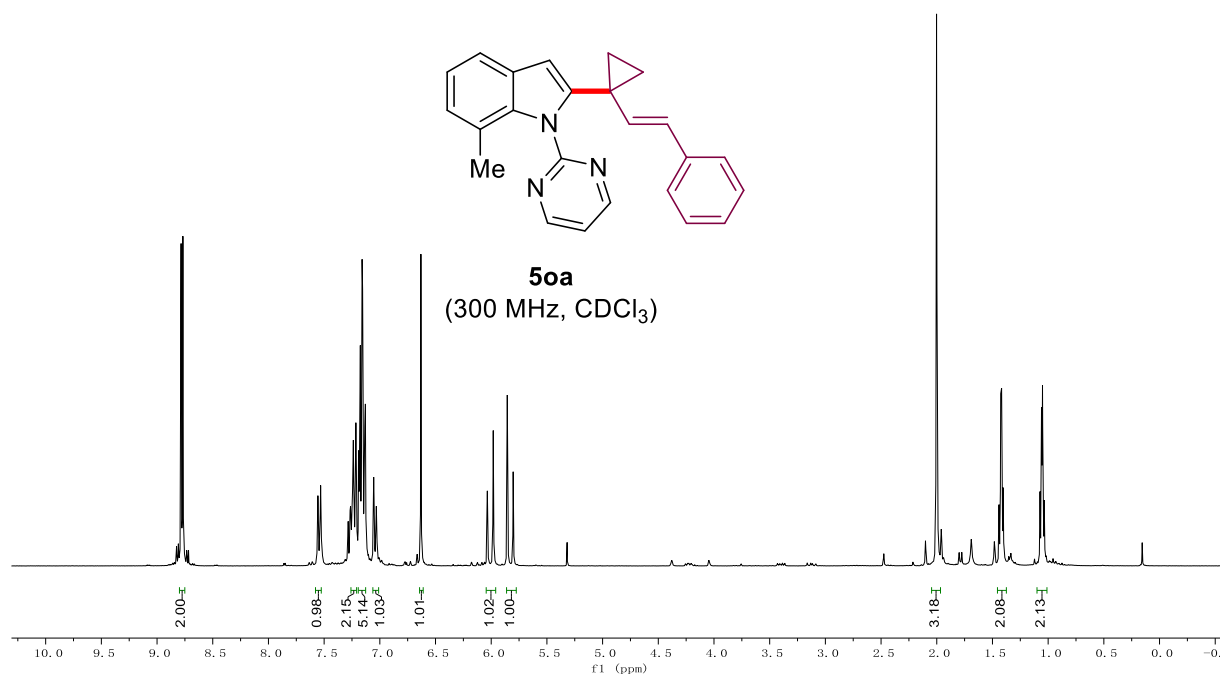

159.5  
157.9  
143.2  
137.4  
136.9  
134.9  
128.9  
128.3  
127.7  
126.6  
125.8  
125.4  
121.7  
119.4  
118.4  
105.3  
21.4  
19.7  
16.8

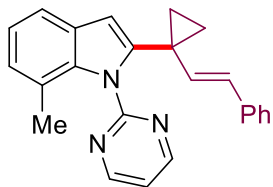

**5a**  
(101 MHz, CDCl<sub>3</sub>)

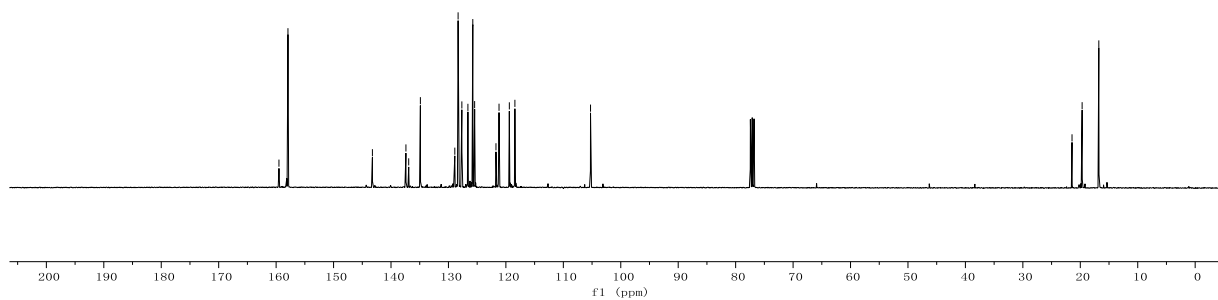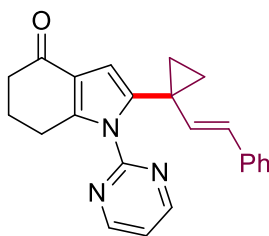

**5pa**  
(400 MHz, CDCl<sub>3</sub>)

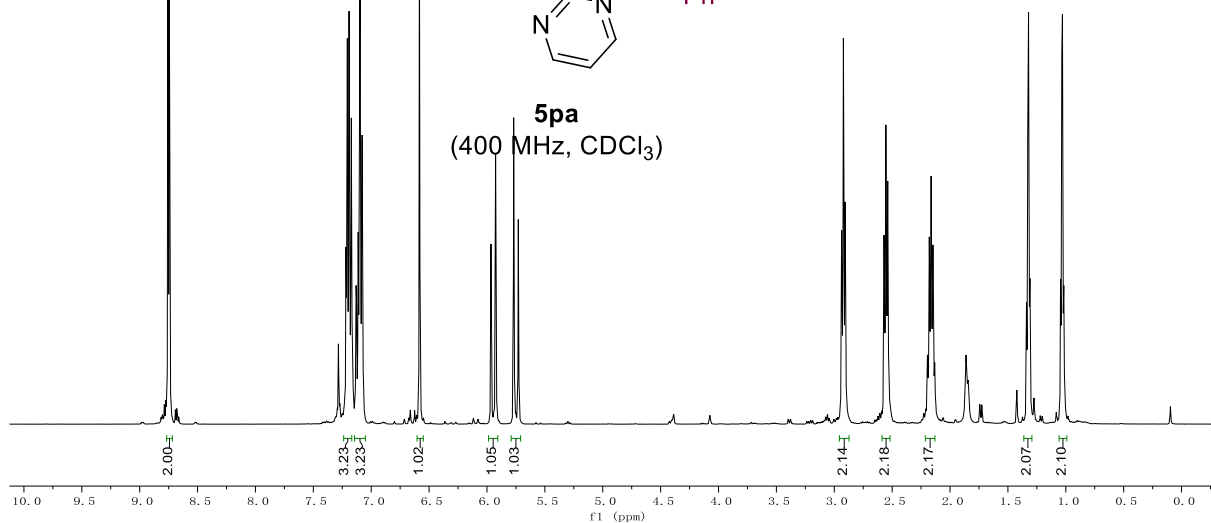



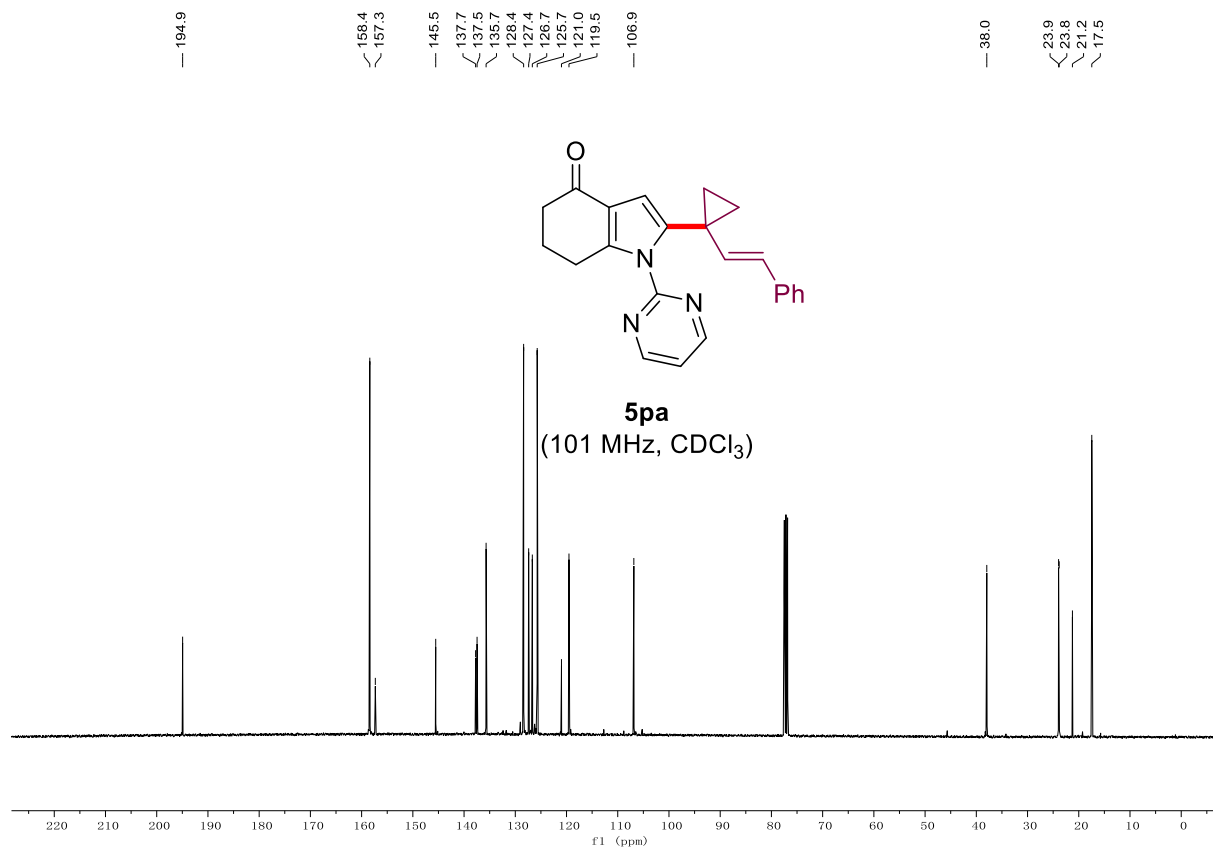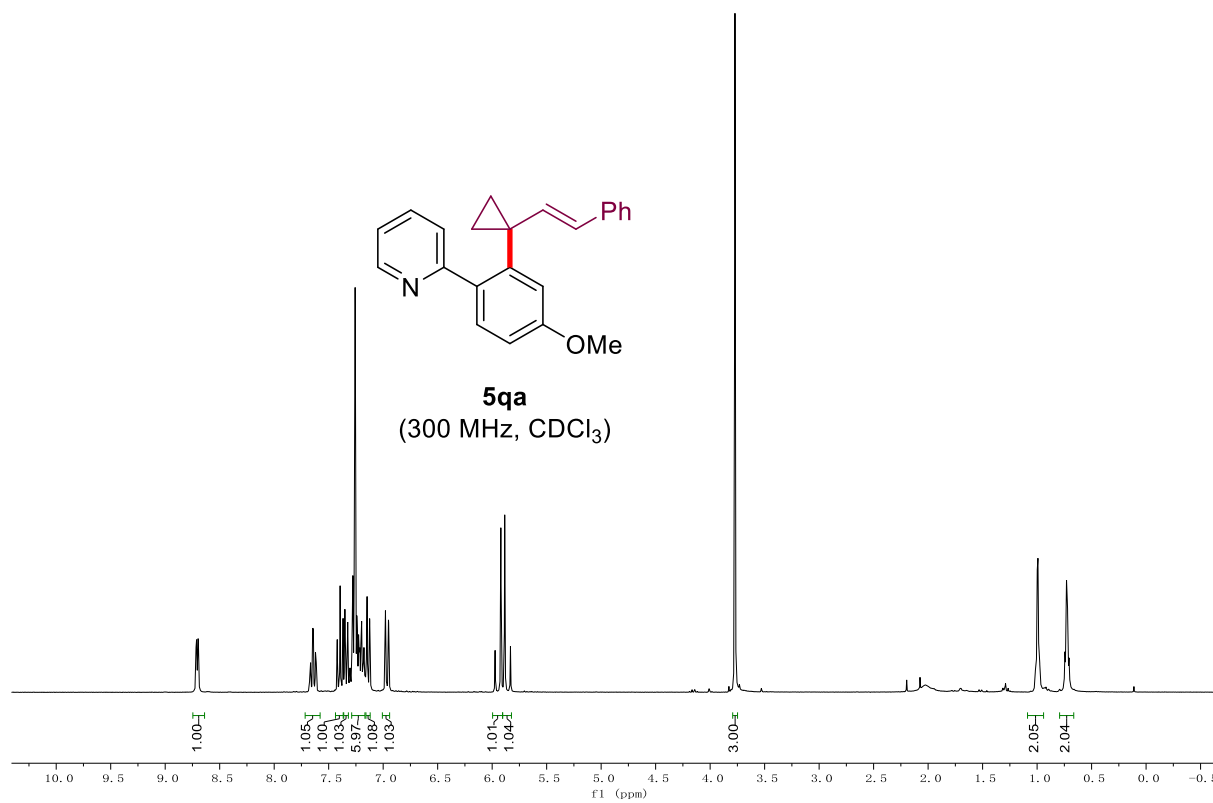

157.3  
156.8  
148.7  
142.0  
139.2  
137.7  
136.5  
131.8  
129.1  
128.4  
127.5  
126.6  
125.7  
124.4  
121.7  
109.8

55.9

27.7

16.3

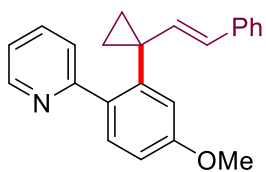

**5qa**

(75 MHz, CDCl<sub>3</sub>)

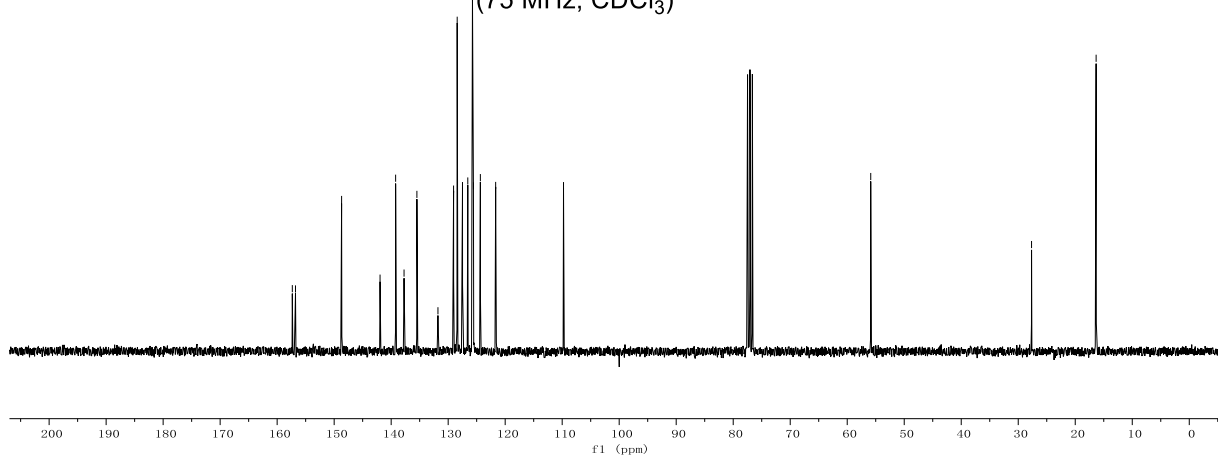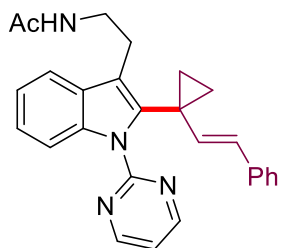

**5ra**

(300 MHz, CDCl<sub>3</sub>)

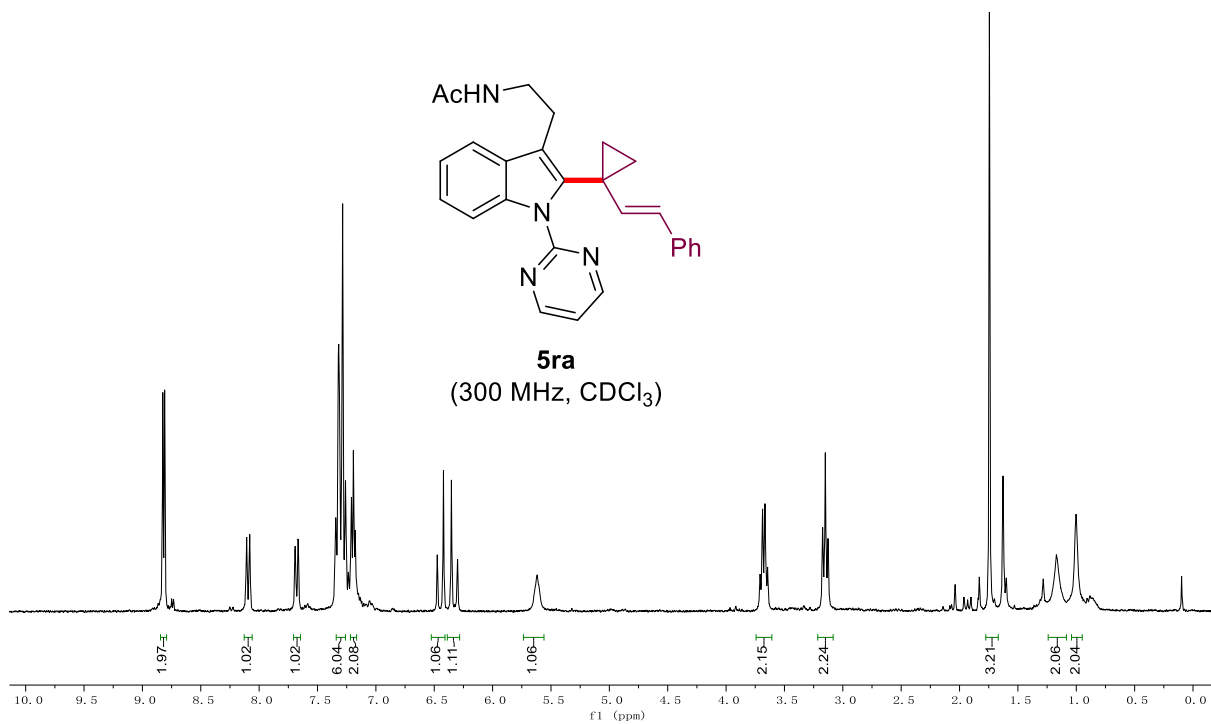

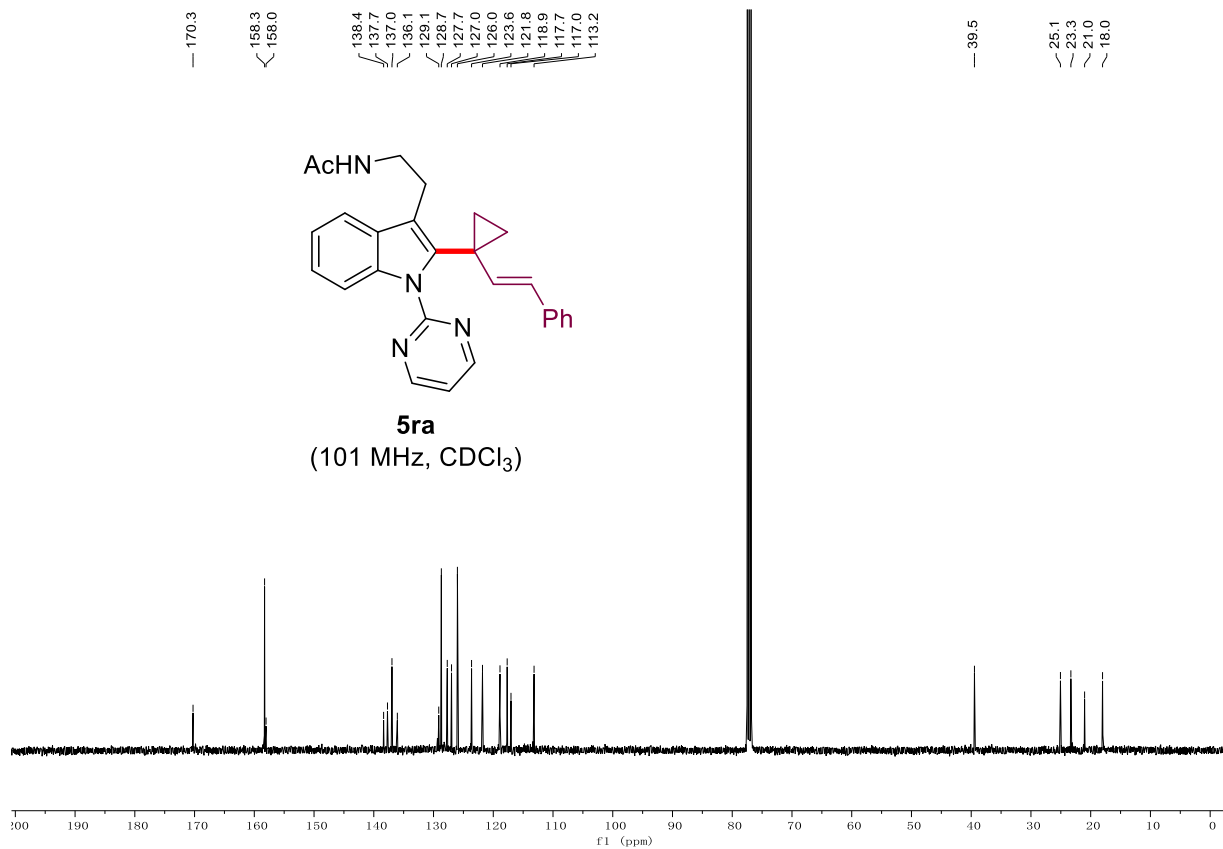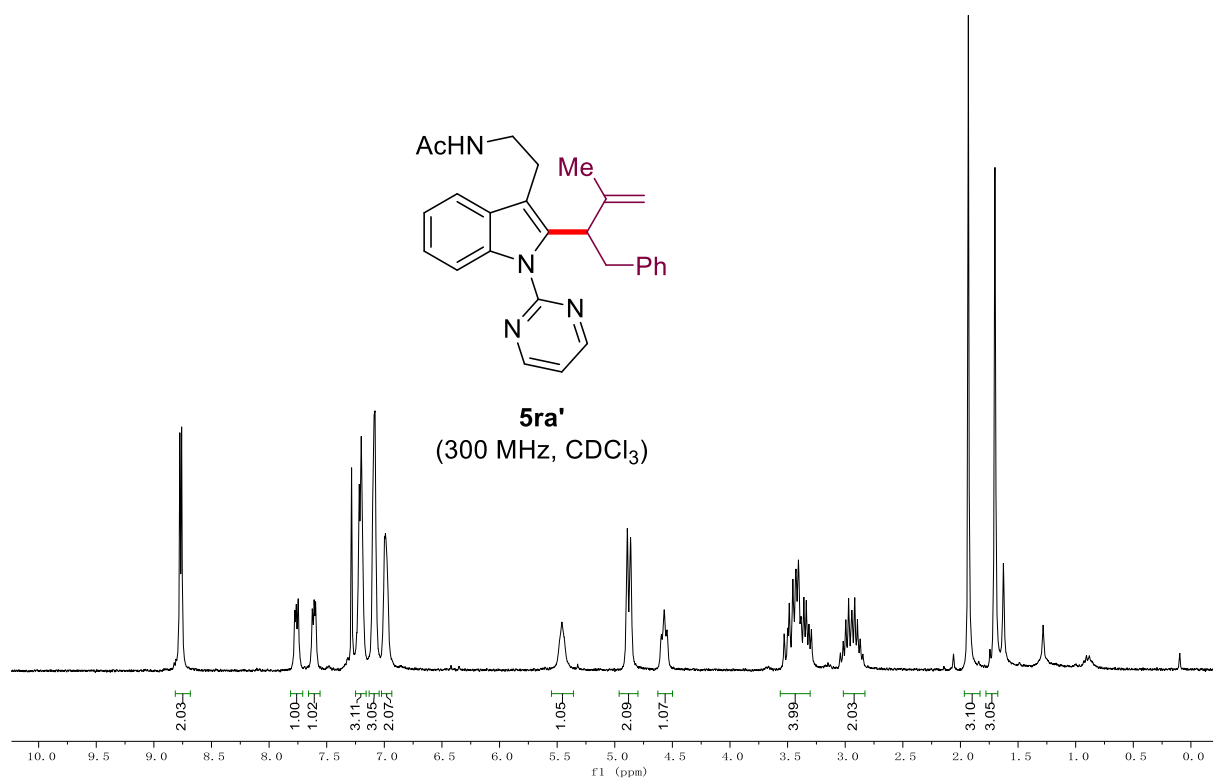

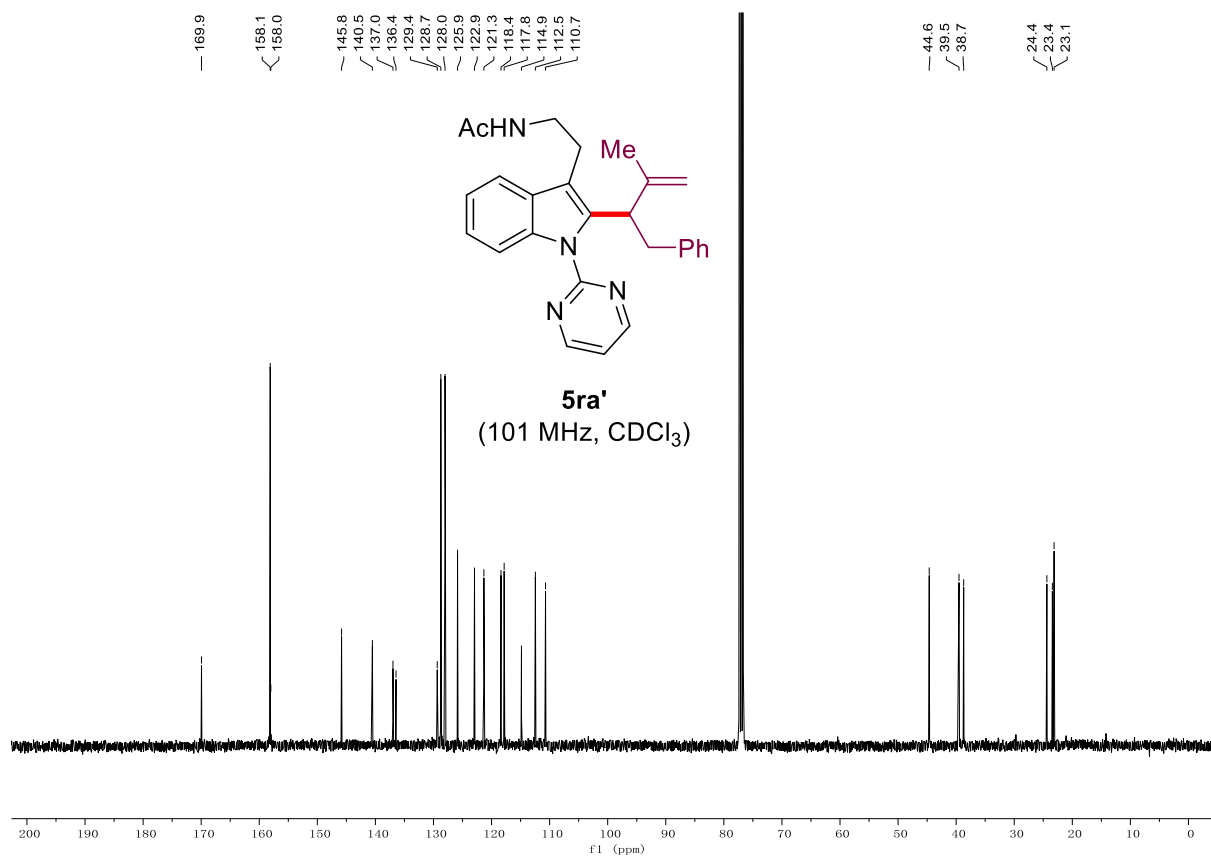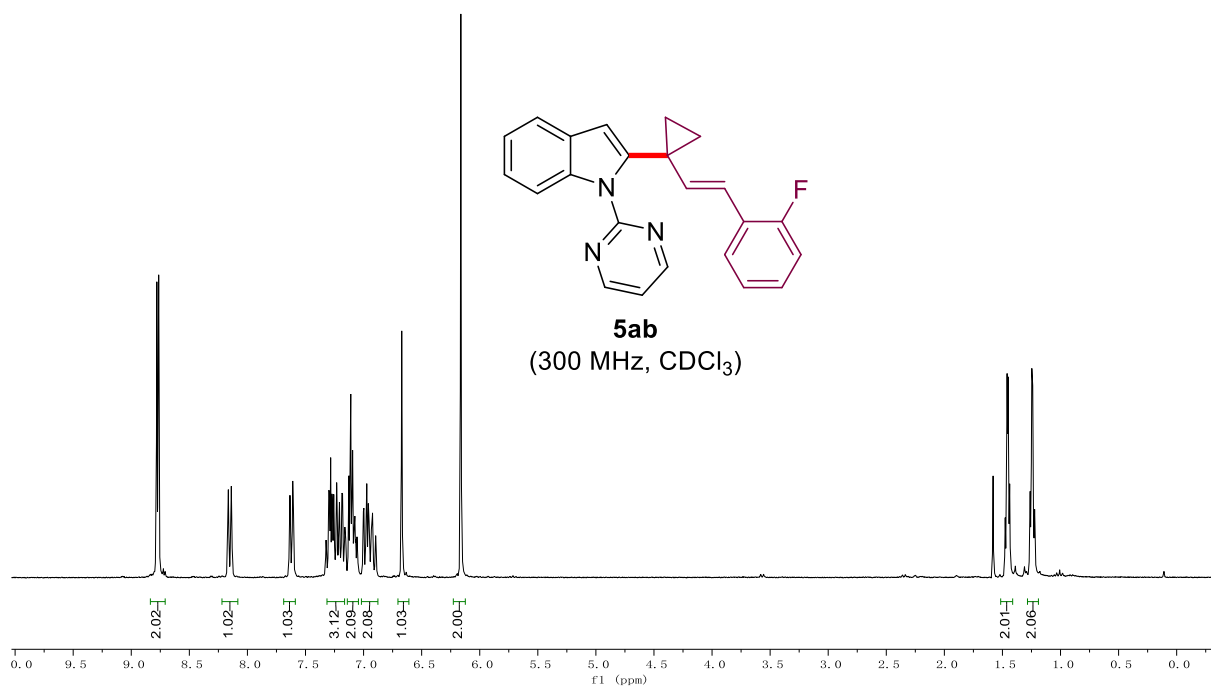

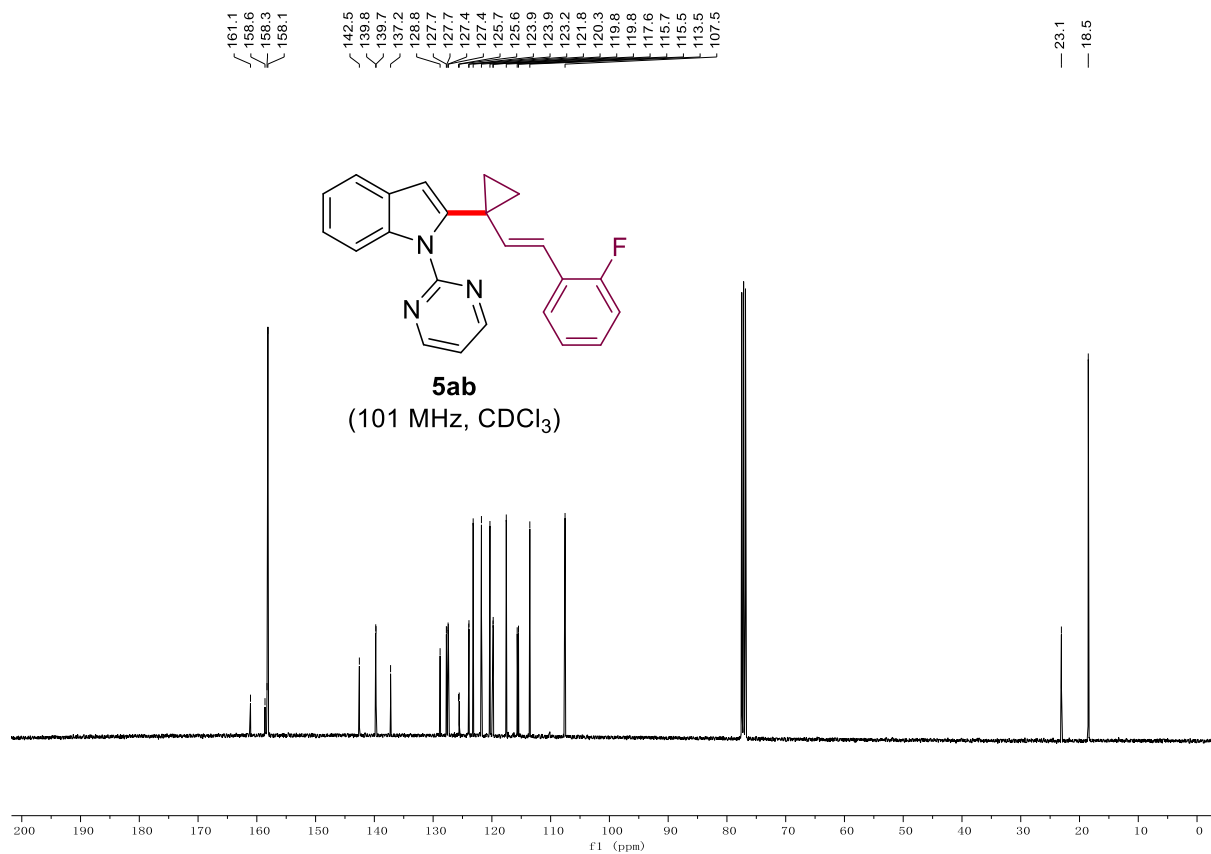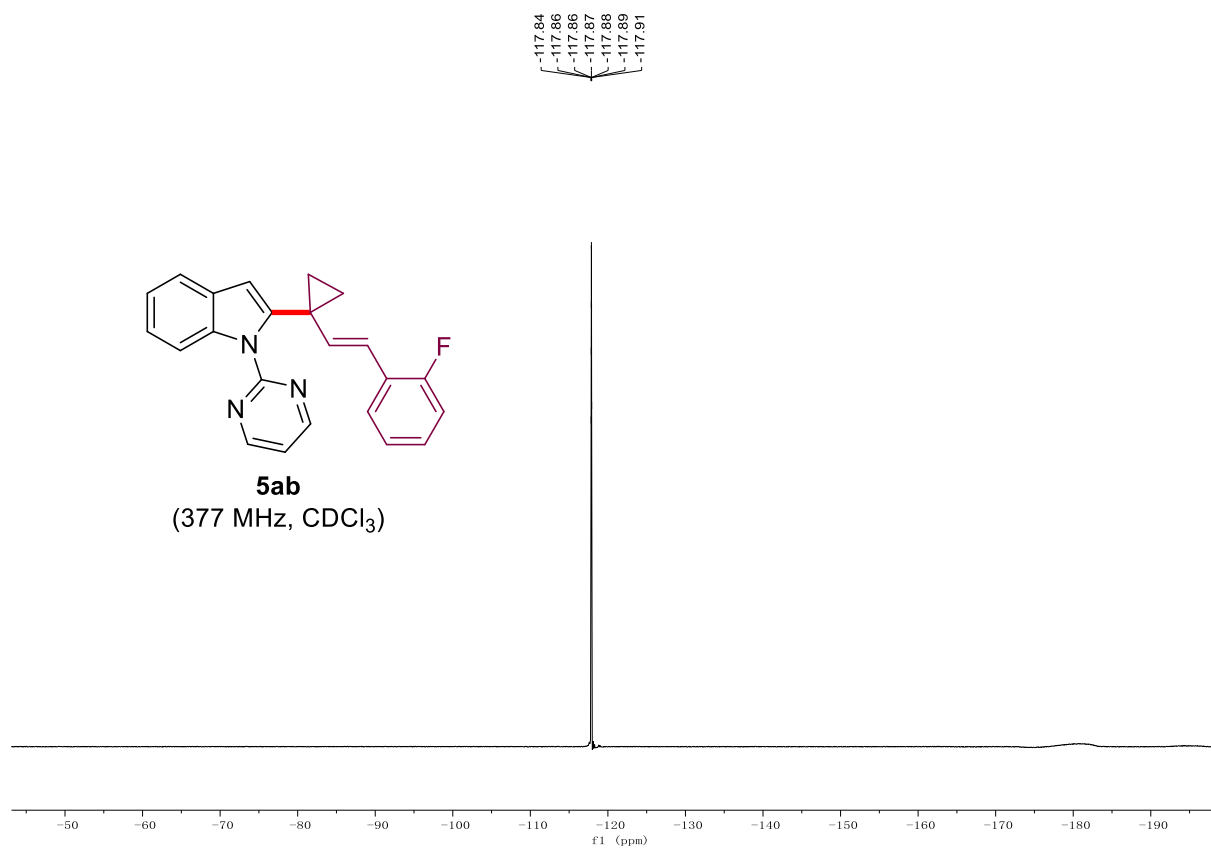

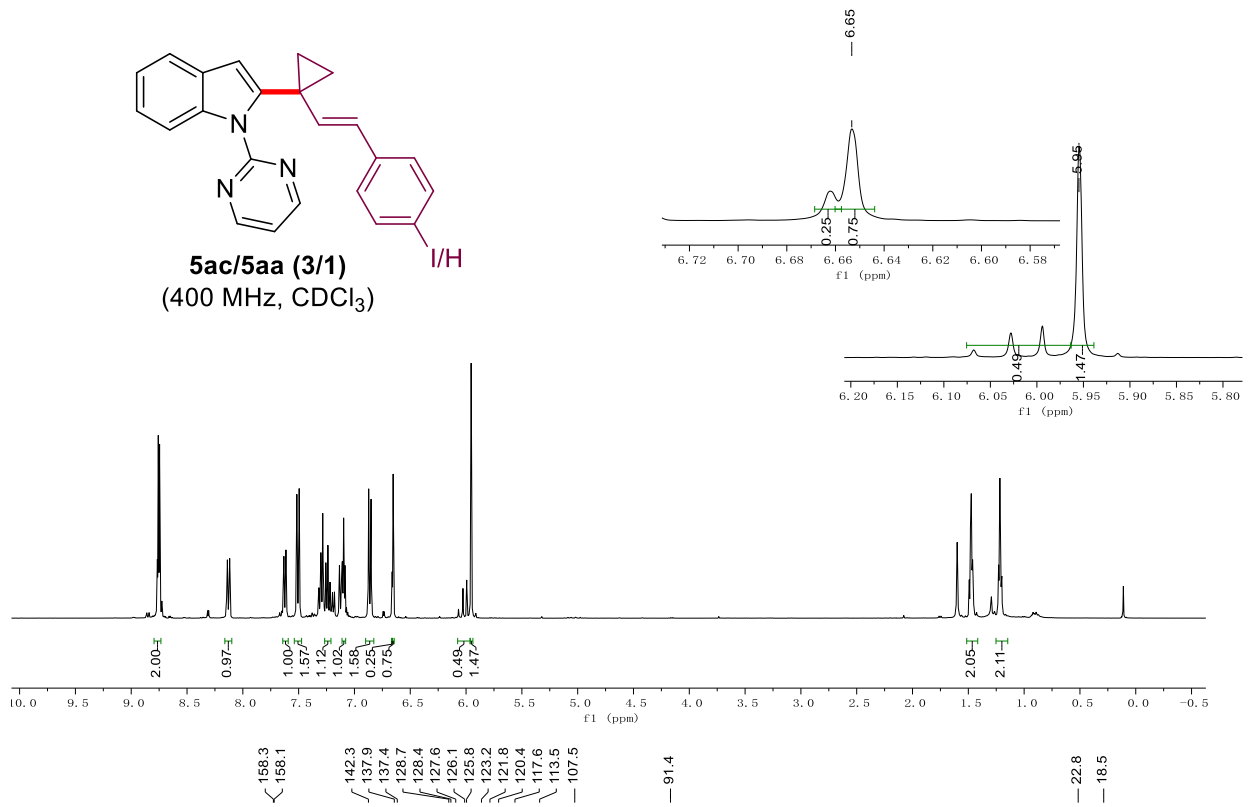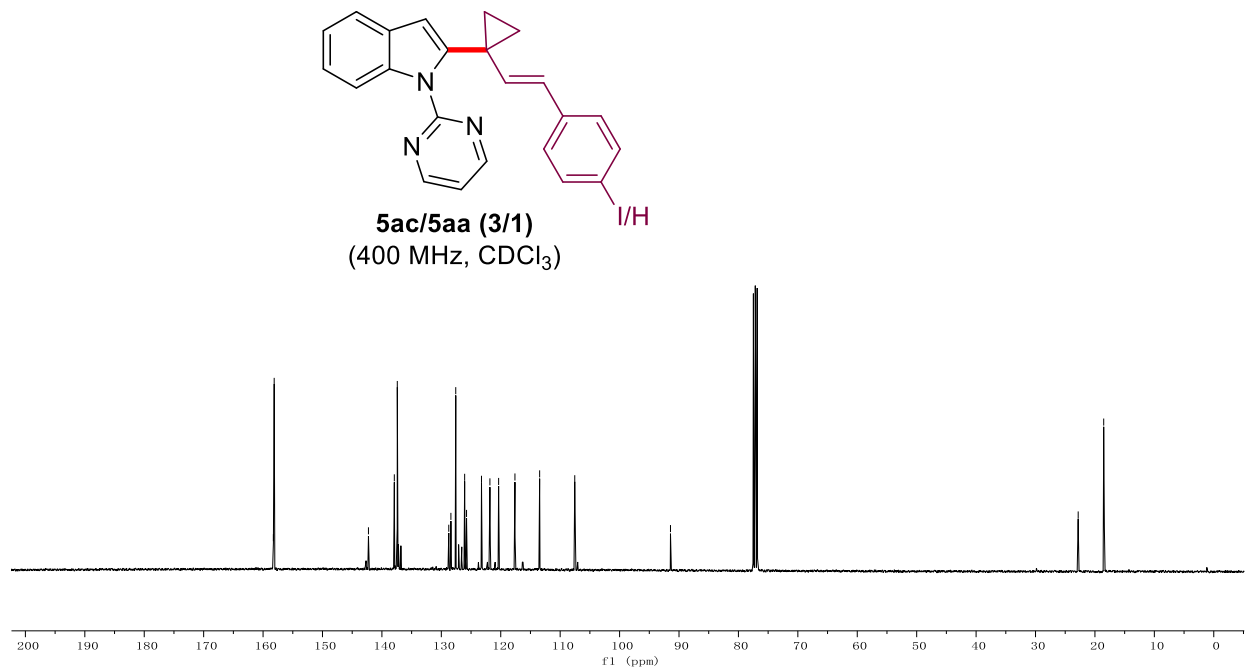

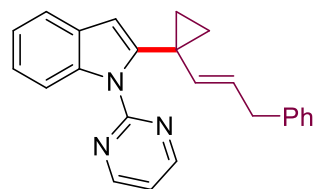

**5ad**  
(300 MHz, CDCl<sub>3</sub>)

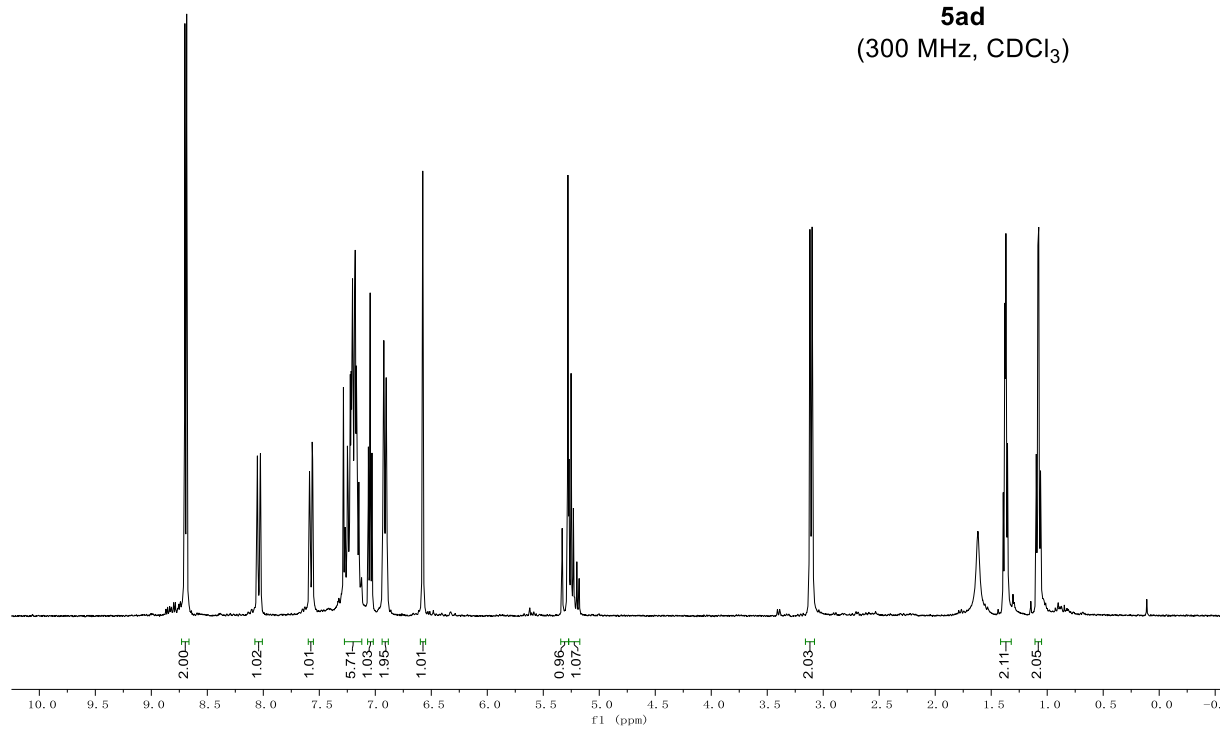

158.2  
157.9  
143.2  
140.9  
137.5  
137.2  
128.7  
128.5  
128.3  
126.5  
125.8  
123.0  
121.6  
120.2  
117.5  
113.2  
106.7  
38.8  
22.0  
17.6

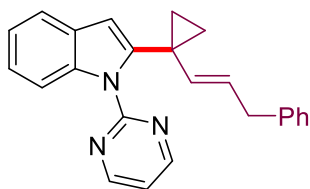

**5ad**  
(101 MHz, CDCl<sub>3</sub>)

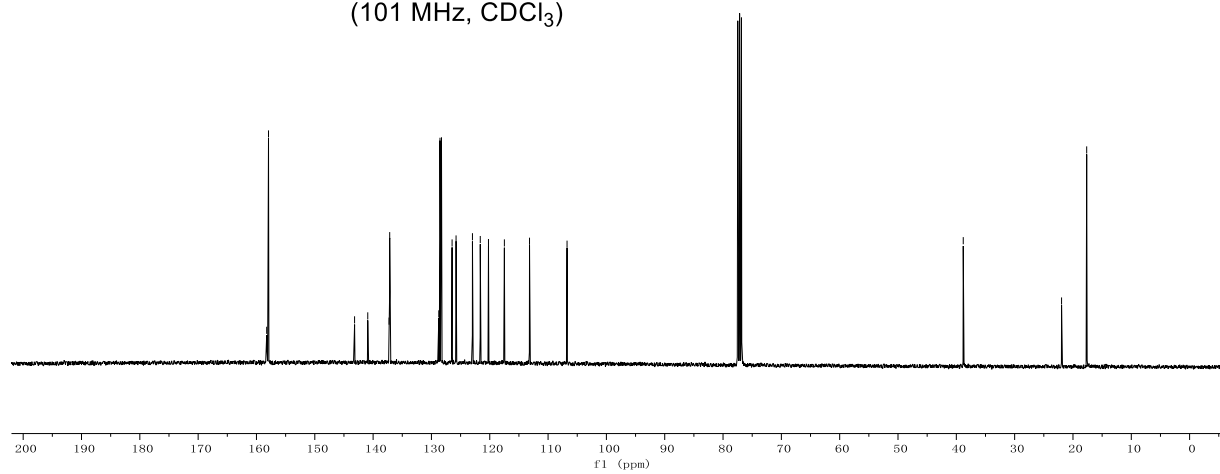

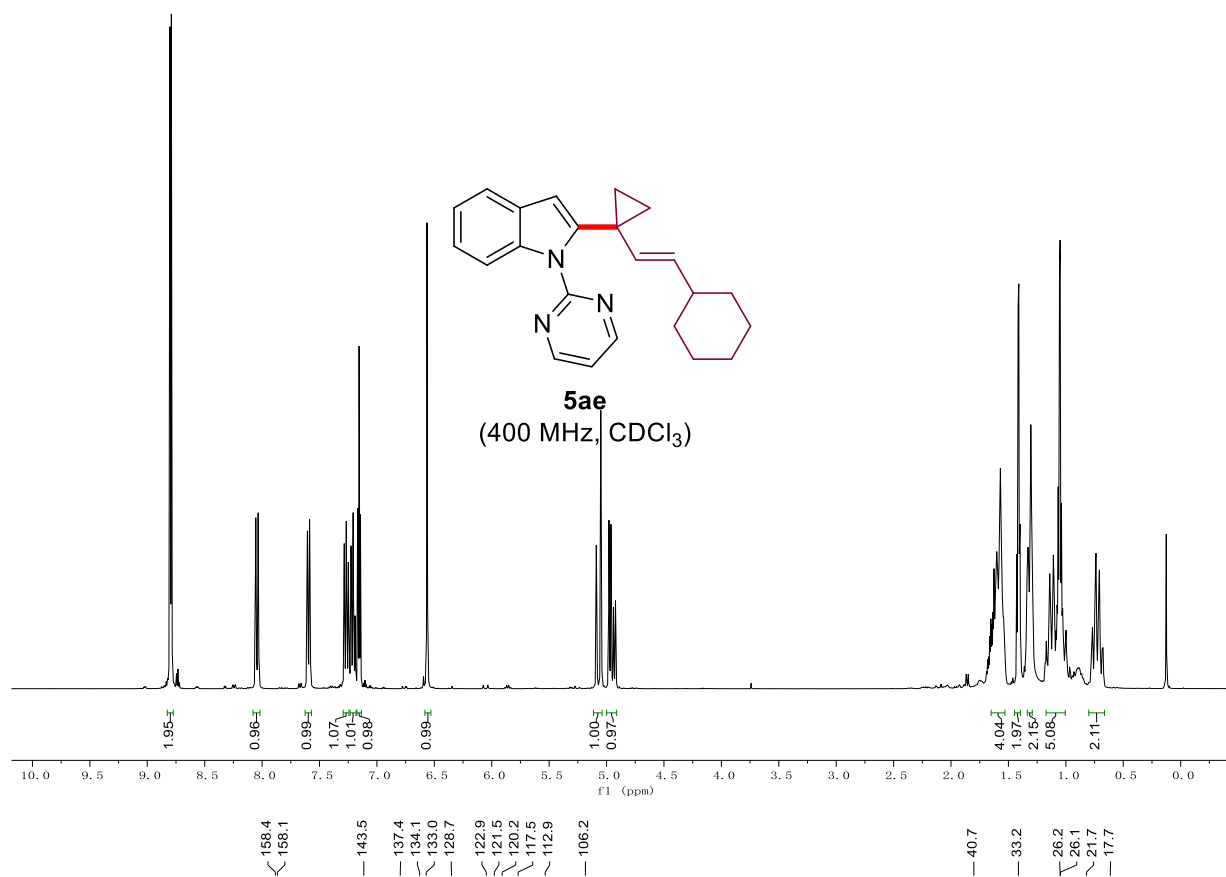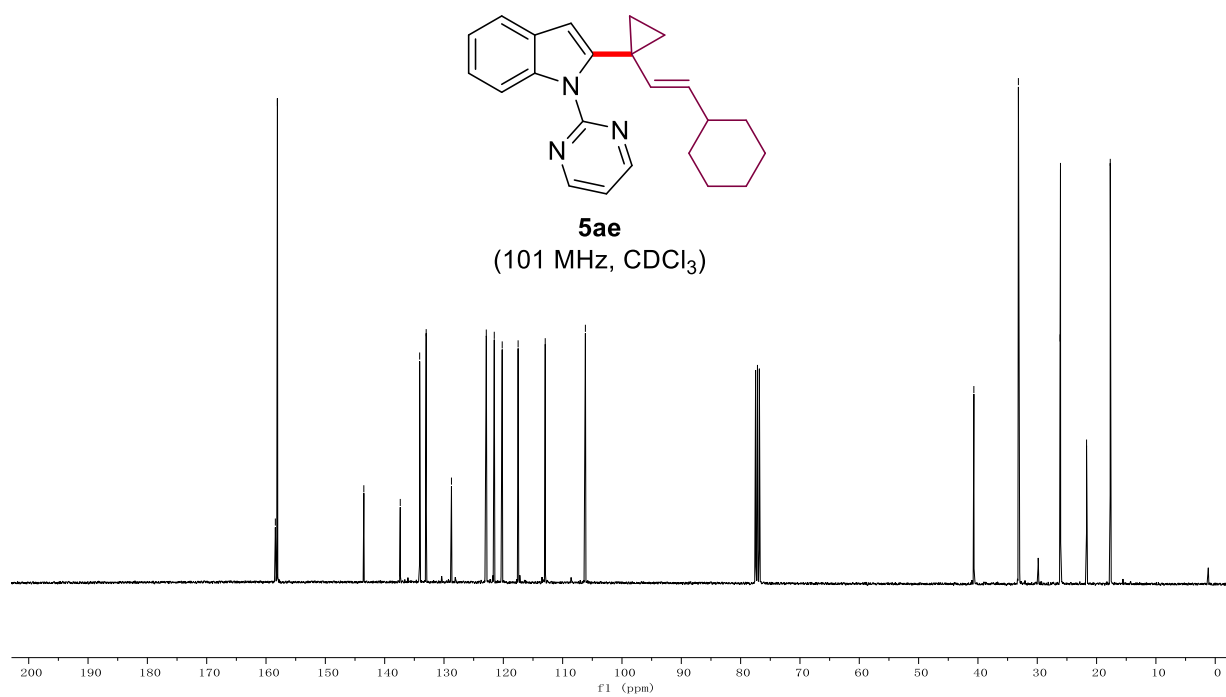



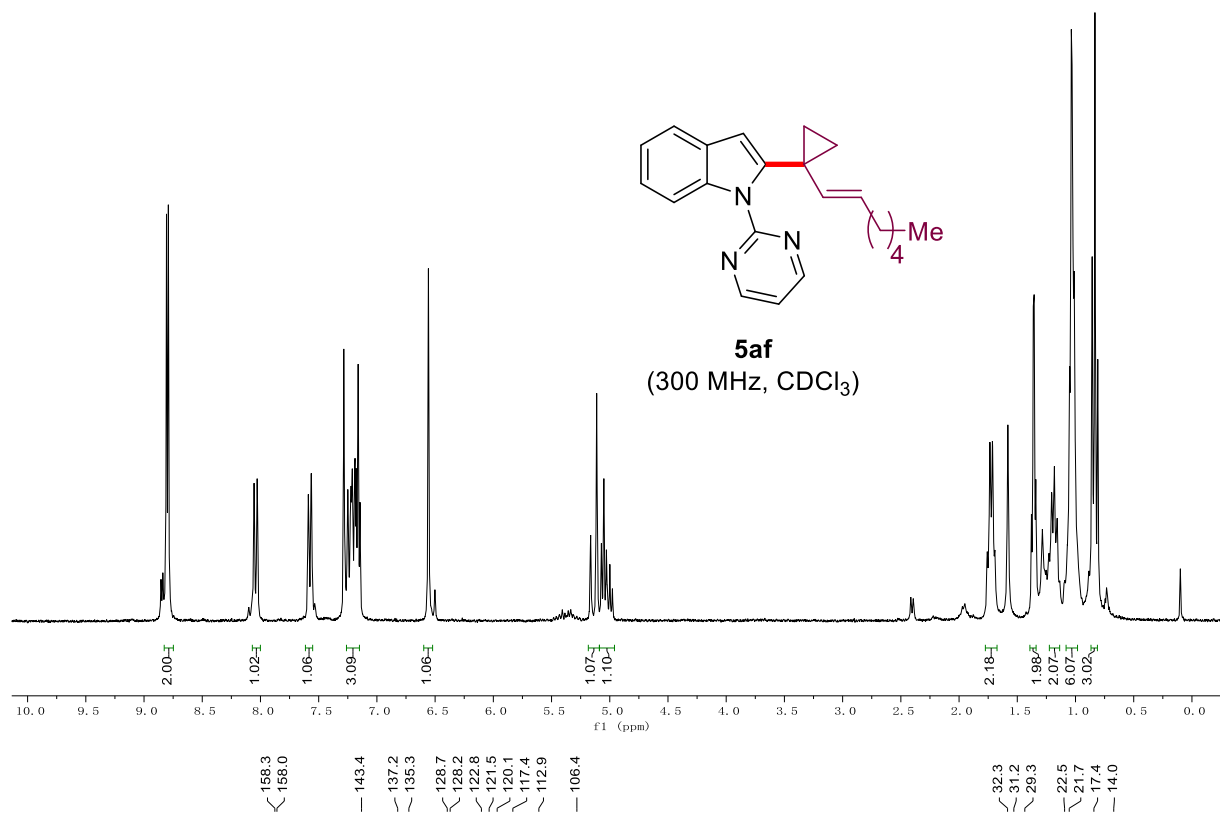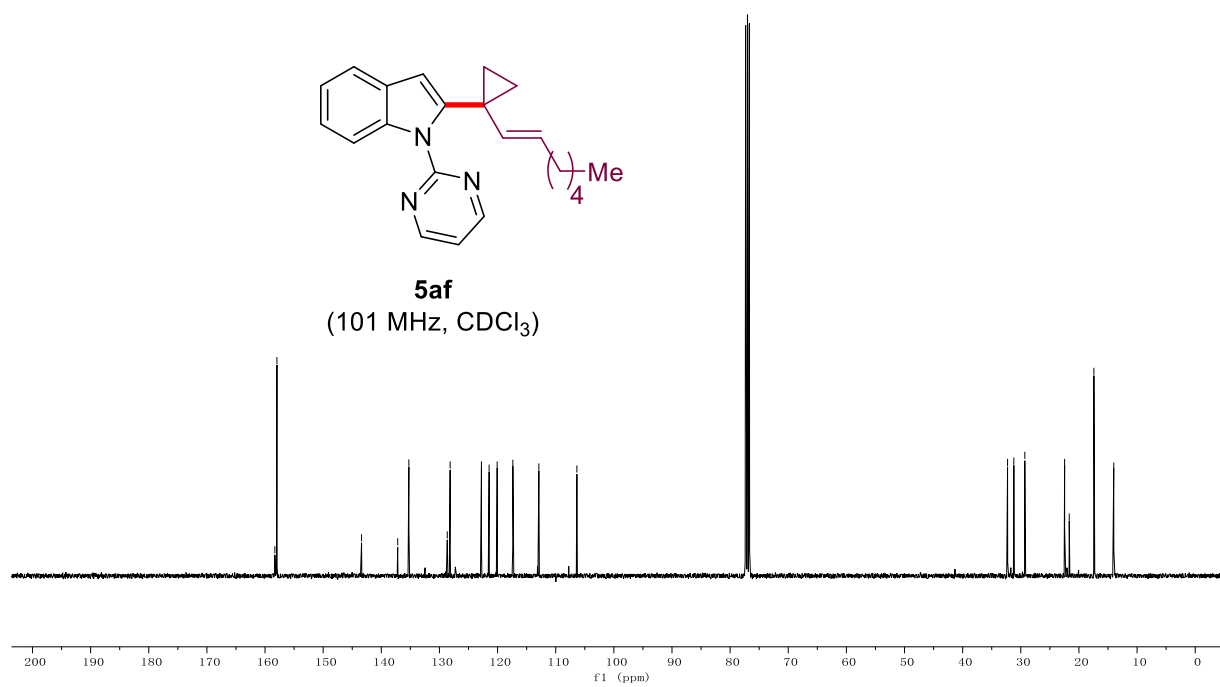

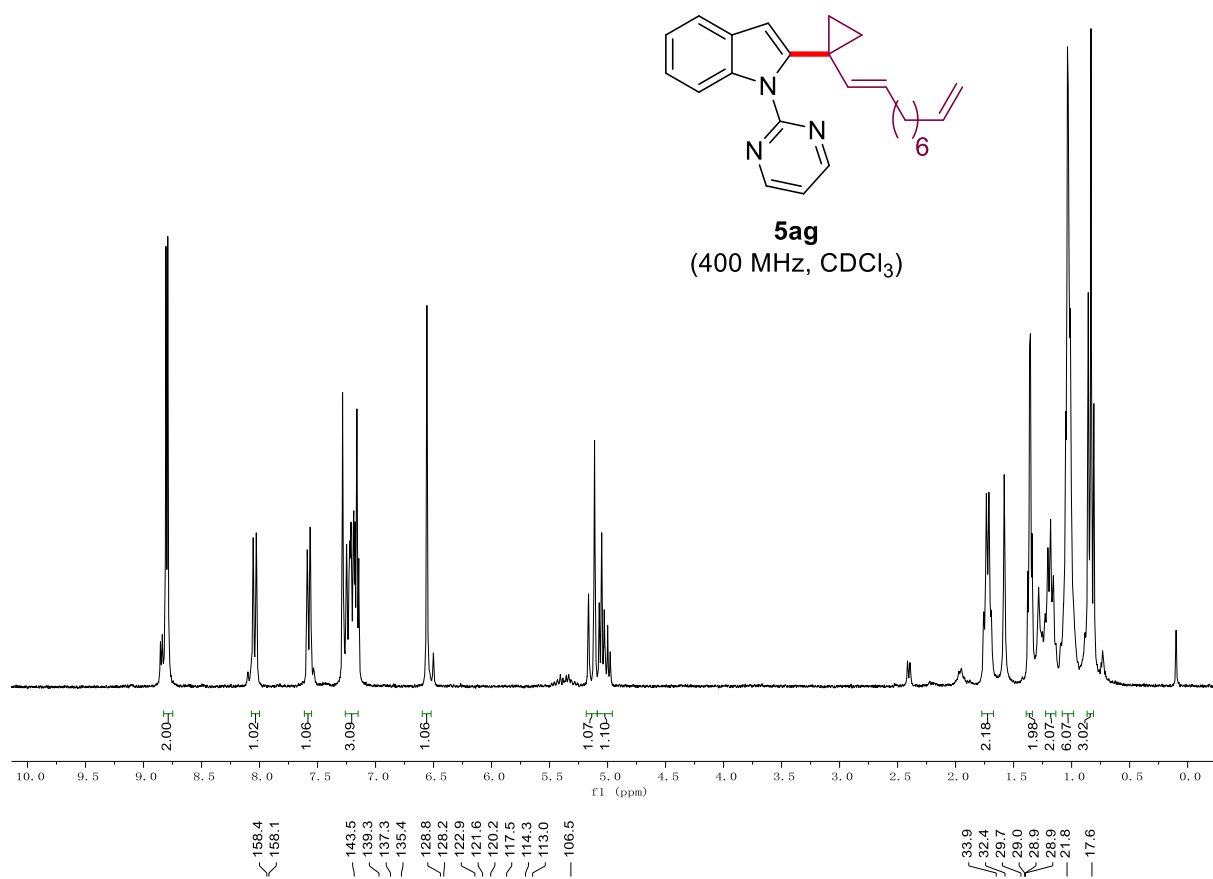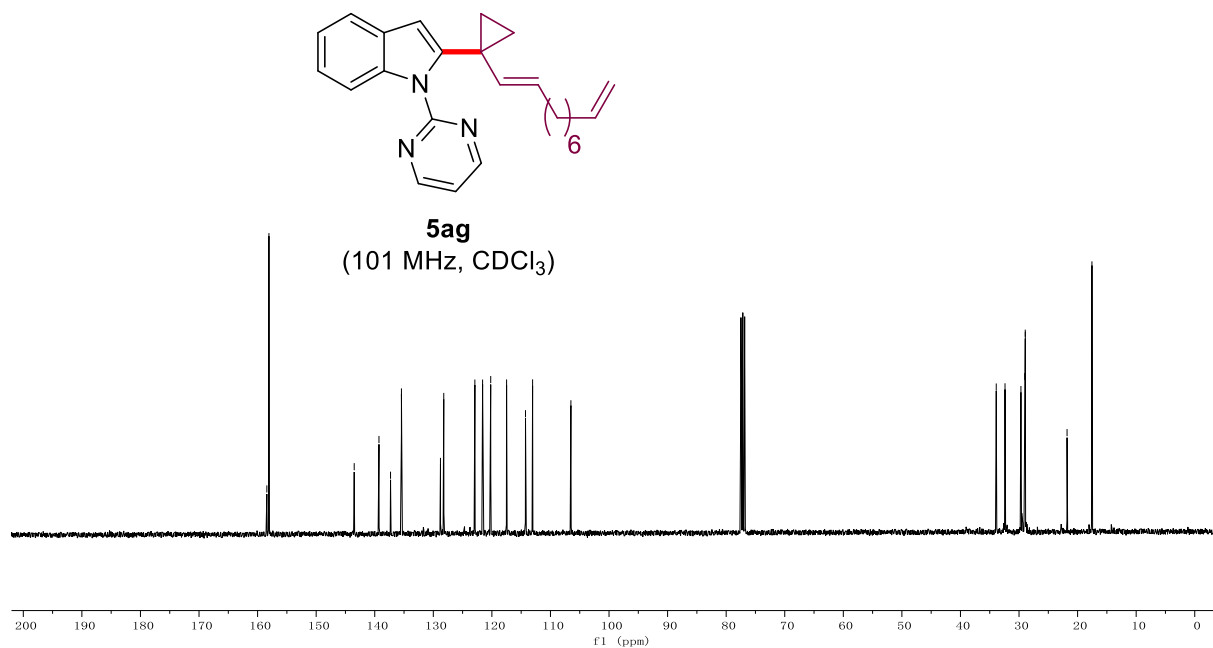

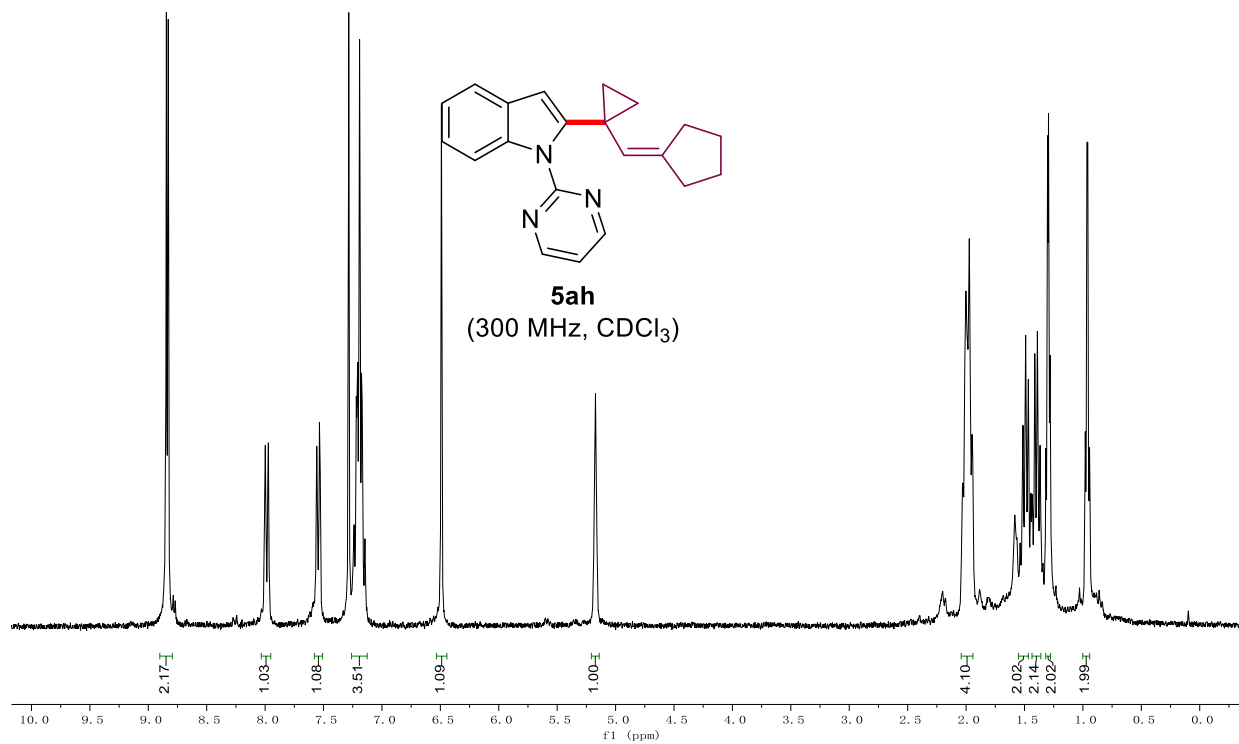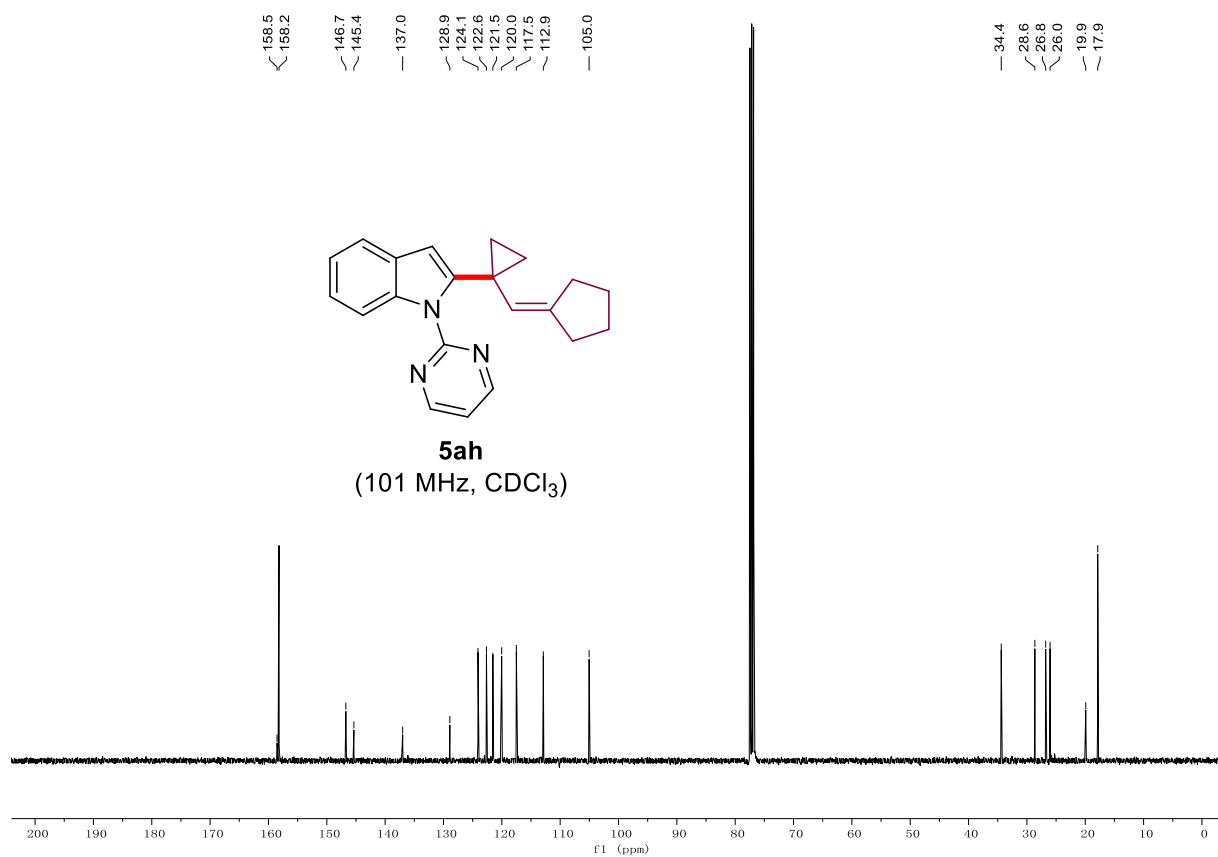

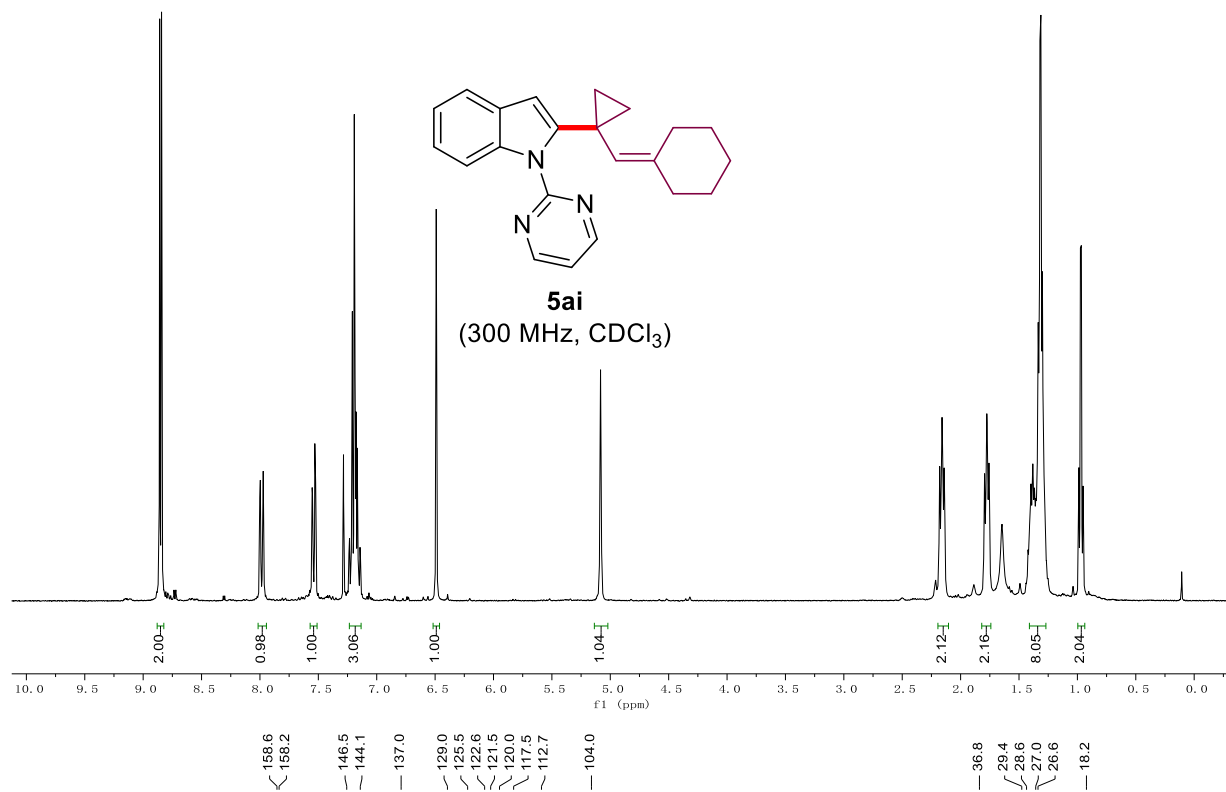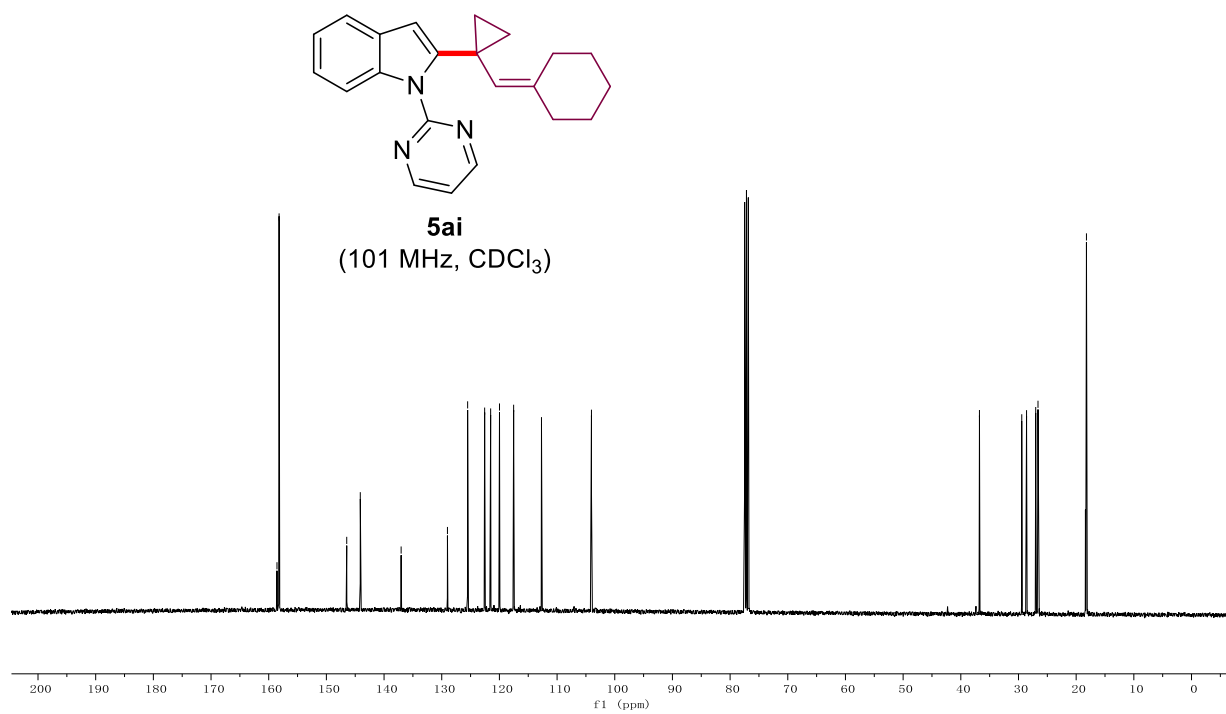

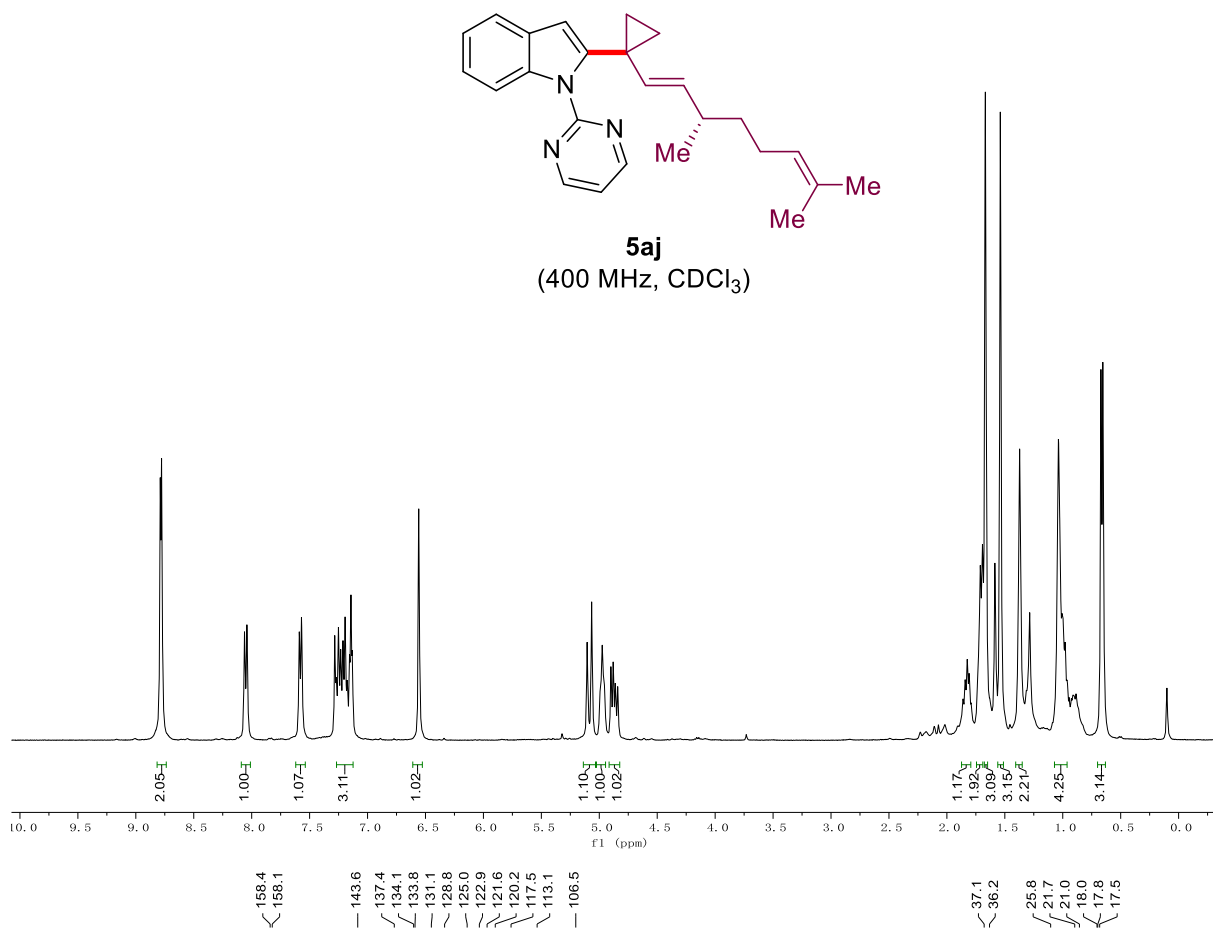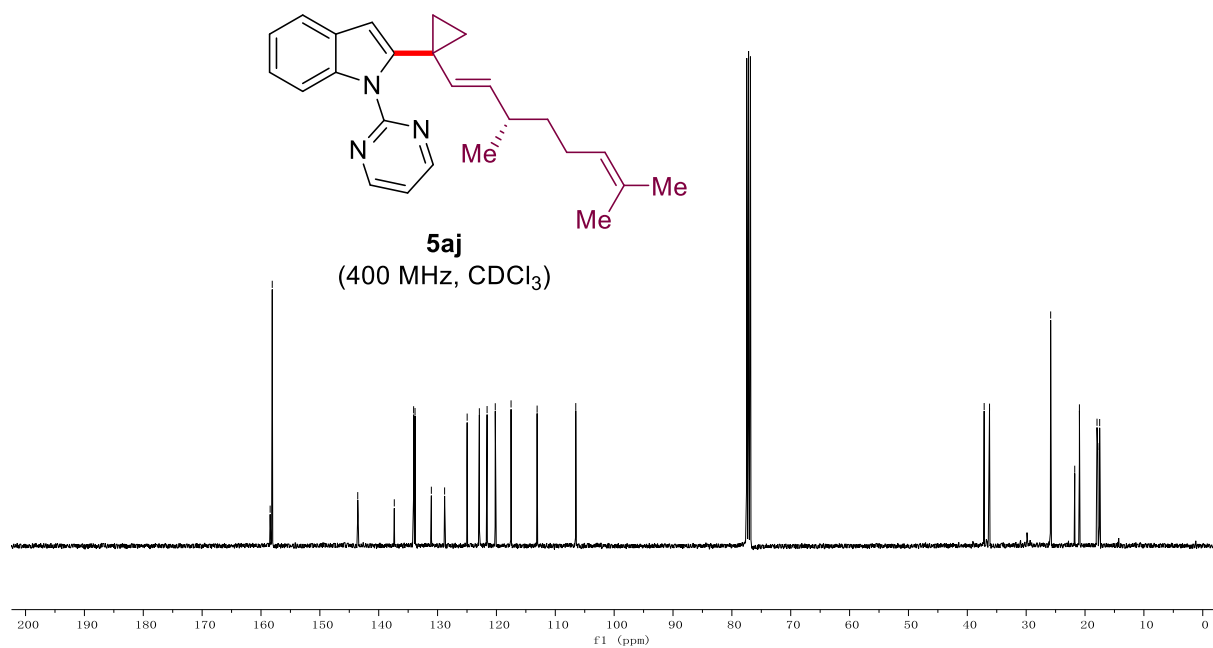

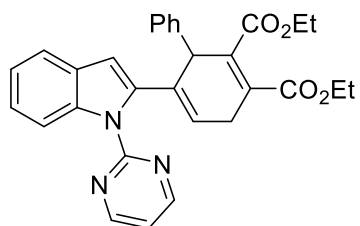

**7**  
(300 MHz, CDCl<sub>3</sub>)

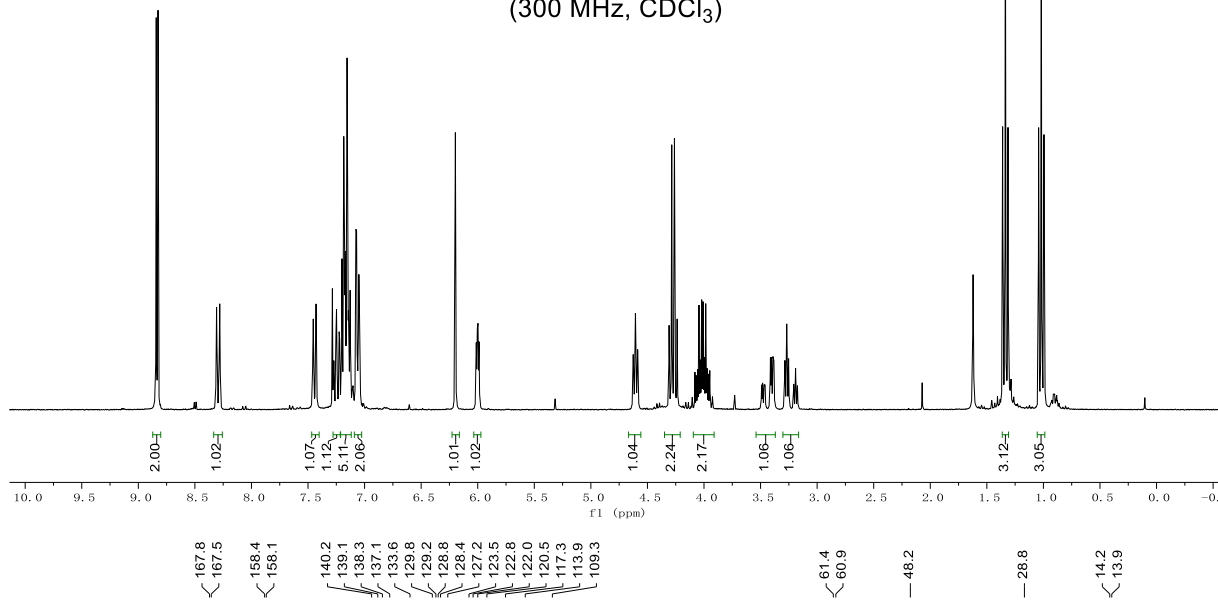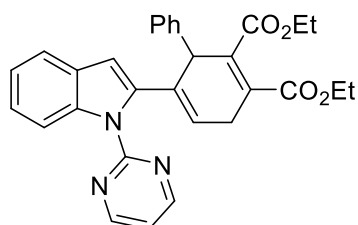

**7**  
(75 MHz, CDCl<sub>3</sub>)

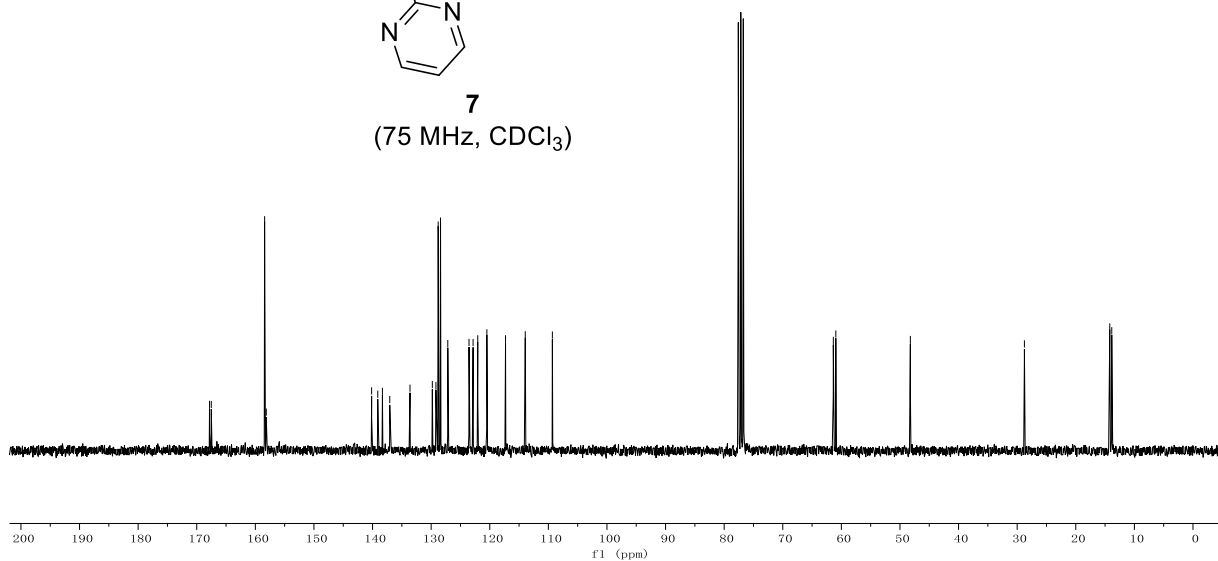

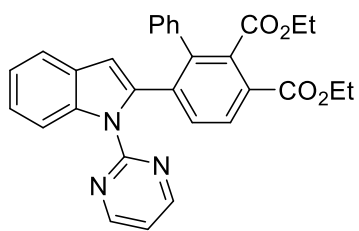

**8**  
(300 MHz, CDCl<sub>3</sub>)

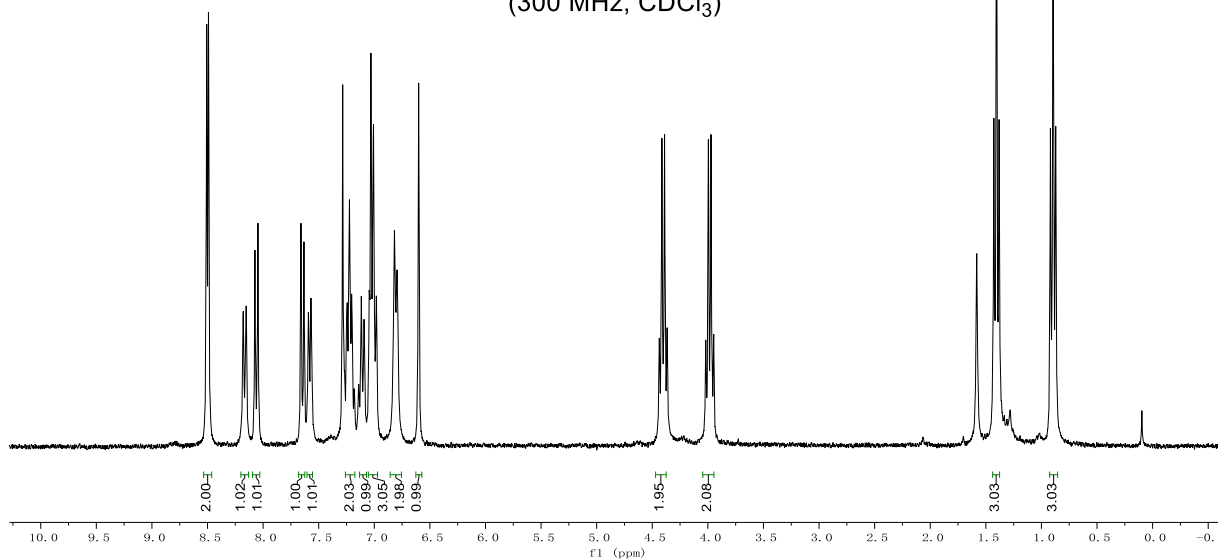

168.7  
165.8  
157.9  
157.2  
139.5  
138.5  
137.8  
137.2  
137.0  
136.3  
130.7  
129.2  
129.1  
129.0  
127.5  
127.5  
127.3  
124.0  
122.2  
120.7  
117.1  
114.0  
111.3

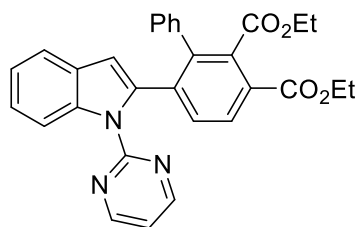

**8**  
(101 MHz, CDCl<sub>3</sub>)

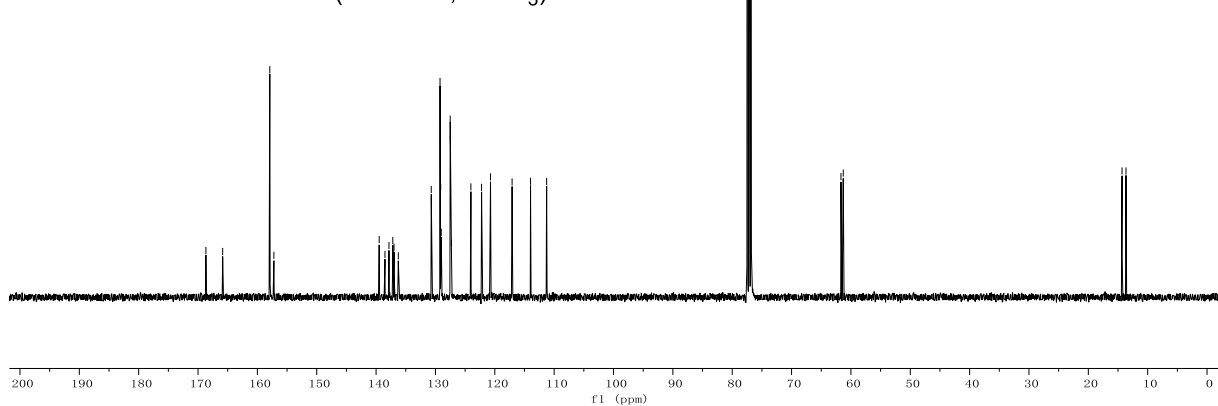

Supplement: d0cc08123j1.pdf [file d0cc08123j1.pdf]
